# Supplementary material for: Synthesis, self-assembly and optical properties of some rigid π-bridged triphenylene dimers
Source: Royal Society of Chemistry journal article supplement (doi:10.1039/d2tc02441a), 2022-01-01
Supplement: d2tc02441a1.pdf [file d2tc02441a1.pdf]

## Supporting Information

### Synthesis, self-assembly and optical properties of some rigid $\pi$ -bridged triphenylene dimers.

Hang Lin,<sup>a</sup> Ke-Xiao Zhao,<sup>a</sup> Min Jing,<sup>a</sup> Xiu-Hai Long,<sup>a</sup> Ke-Qing Zhao,<sup>a,\*</sup> Ping Hu,<sup>a</sup> Bi-Qin Wang,<sup>a</sup> Peng Lei,<sup>b</sup> Qing-Dao Zeng,<sup>b</sup> Bertrand Donnio<sup>c,\*</sup>

<sup>a</sup>Sichuan Normal University, Chengdu 610066, China. E-mail: kqzhao@sicnu.edu.cn

<sup>b</sup>Key Laboratory of Standardization and Measurement for Nanotechnology, Center for Excellence in Nanoscience, National Center for Nanoscience and Technology (NCNST), Beijing 100190, China.

<sup>c</sup>Institut de Physique et Chimie des Matériaux de Strasbourg (IPCMS), CNRS-Université de Strasbourg (UMR7504), Strasbourg, 67034 France. E-mail:bertrand.donnio@ipcms.unistra.fr

| Table of contents |                                                                             |           |
|-------------------|-----------------------------------------------------------------------------|-----------|
| Entry             | Section                                                                     | Pages     |
| 1.                | Experimental techniques                                                     | 2         |
| 2.                | Synthesis and Characterization (Schemes S1-S13)                             | 2 - 15    |
| 3.                | <sup>1</sup> H, <sup>13</sup> C and <sup>19</sup> F NMR (Figures S1 – S29)  | 15 - 45   |
| 4.                | HRMS (Figures S30 – S49)                                                    | 45 - 55   |
| 5.                | UV-Vis absorption and photoluminescence (Figures S50 – S52, Tables S1 – S2) | 55 - 58   |
| 6.                | Gels and xerogels (Figures S53 - S54)                                       | 59 - 62   |
| 7.                | DFT (Figures S55 – S60, Tables S3 – S6)                                     | 63 - 88   |
| 8.                | POM (Figure S61)                                                            | 84 - 91   |
| 9.                | TGA (Figures S62 – S63, Table S7)                                           | 92        |
| 10.               | DSC (Figures S64 – S66, Table S8)                                           | 93 - 97   |
| 11.               | SWAXS (Figures S67 – S70, Tables S9 – S13)                                  | 97 - 109  |
| 12.               | STM (Figure S71)                                                            | 110       |
| 13.               | Models' variations (Figures S72 – S74)                                      | 110 - 111 |

## 1. Experimental techniques

**Elemental analysis.** EA were measured on a Vario Micro cube (Elementar company, German).

**NMR, HRMS, UV-Vis, PL.**  $^1\text{H}$  NMR was measured on a Varian INOVA 400 MHz or Bruker AVANCETM 600 MHz spectrometers in  $\text{CDCl}_3$  using TMS as the internal standard.  $^{13}\text{C}$  NMR and  $^{19}\text{F}$  NMR was recorded on a Varian UNITY INOVA-400 (100 MHz and 376 MHz). The high-resolution mass spectra (HRMS) were measured on a Fourier Transform ion cyclotron resonance mass spectrometer (7.0T FTICRMS) instrument made by Ion Spec (Varian now) with MALDI or ESI as the ion source. Ultraviolet-visible (UV-Vis) absorption spectra were measured at room temperature on a Perkin Elmer Lambda 950 spectrophotometer. Photoluminescence (PL) was measured on a HORIBA Fluoromax-4p, and the absolute quantum yields were measured by a HORIB-F-3029 Integrating Sphere, HORIBA, Kyoto, Japan.

**POM, DSC and TGA.** The optical textures of liquid crystals were observed using a XP-201 and an Olympus BH2 Polarised Optical Microscope (POM) equipped with a XP-201 and Mettler FP82HT hot-stages of which temperatures were controlled by a XPR-201 and Mettler FP90. The phase transition temperatures and enthalpies were investigated using a TA-DSC Q100 differential scanning calorimeter (DSC) under  $\text{N}_2$  atmosphere with heating or cooling rate of  $10\text{ }^\circ\text{C}/\text{min}$ . The thermal gravimetric analysis (TGA) was measured on a TA TGA-Q500 instrument with heating rate of  $10\text{ }^\circ\text{C}/\text{min}$  in  $\text{N}_2$  atmosphere.

**SWAXS.** Temperature-variation SWAXS experiments were performed on a Rigaku Smartlab (3) X-Ray diffractometer equipped with a TCU 110 temperature control unit. The sample temperature was controlled within  $\pm 1\text{ K}$ . The X-ray sources ( $\text{Cu K}\alpha$ ,  $\lambda=0.154\text{ nm}$ ) were provided by 40 kW ceramic tubes.

**DFT.** Molecular structures, orbital frontiers, HOMO and LUMO were calculated by DFT. The B3LYP-D3 method with basis set of 6-311++G(d,p)\*\* was applied. First, the molecular structures were optimized to obtain most stable molecular geometry. Molecular structures were modelled by MM2 from Chem3D 15.0, after minimization of the energy (step interval 2fs, frame interval 10 fs, 10000 steps).

## 2. Synthesis and characterization

All solvents and some chemical reagents below are commercial products, and were used without further purification.

| Compound                              | Structure                                                                            | Purity | Manufacturer                  |
|---------------------------------------|--------------------------------------------------------------------------------------|--------|-------------------------------|
| 2-Thiophenylboronic acid              | 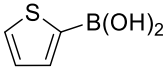  | 98%    | Sukailu Chem. Tech. Co., Ltd. |
| 3-Thiophenylboronic acid              |   | 98%    | Sukailu Chem. Tech. Co., Ltd. |
| 2-Furanylboronic acid                 |   | 98%    | Sukailu Chem. Tech. Co., Ltd. |
| Thieno[3,2-b]thiophene-2-boronic acid |  | 98%    | Sukailu Chem. Tech. Co., Ltd. |
| 1,4-Phenylenebisboronic acid          |  | 98%    | Sukailu Chem. Tech. Co., Ltd. |

|                                                                        |                                                                                    |     |                                     |
|------------------------------------------------------------------------|------------------------------------------------------------------------------------|-----|-------------------------------------|
| 4,4'-Biphenyldiboronic acid                                            | 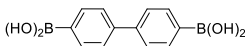 | 98% | Sukailu Chem. Tech. Co., Ltd.       |
| Thieno[3,2- <i>b</i> ]thiophene                                        |   | 98% | Alpha Chemical Co., Ltd.            |
| Benzo[1,2- <i>b</i> :4,5- <i>b'</i> ]dithiophene-4,8-dione             |   | 98% | Sukailu Chem. Tech. Co., Ltd.       |
| 3,4-Dimethoxybromobenzene                                              |   | 98% | Alpha Chemical Co., Ltd.            |
| 5,5'-Bis(4,4,5,5-tetramethyl-1,3,2-dioxaborolan-2-yl)-2,2'-bithiophene |  | 98% | Bide Pharmaceutical Tech. Co., Ltd. |
| Nonafluorobutanesulfonyl fluoride                                      |   | 99% | Jianting Chem. Tech. Co., Ltd.      |

## 2.1. Synthesis of precursor bridges 1 and 3 (Schemes S1 and S2)

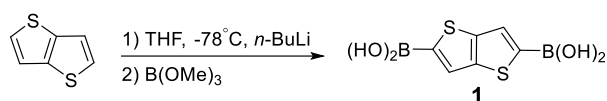

**Scheme S1:** Synthetic scheme bridge 1.

**1:** To thieno[3,2-*b*]thiophene (2.0 g, 14.3 mmol) was slowly added a solution of *n*-butyllithium (21.4 mL, 42.8 mmol) in THF (15 mL) under argon, and the reaction was kept for 0.5h. After stirring at room temperature for 1h, the reaction was cooled down to -78°C, and trimethyl borate (7.19 mL, 64.2 mmol) was added quickly. The mixture was stirred at room temperature for 12h. Then, it was slowly poured into ice water. Diluted hydrochloric acid was added dropwise until the mixture was acidic. After being filtered through a funnel, it was dried in vacuum under argon to yield **2** (1.98g, 61%).

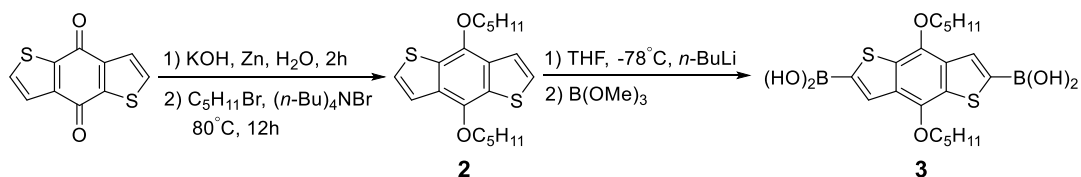

**Scheme S2:** Synthetic scheme of bridge 3.

**2 and 3:** A mixture of benzo[1,2-*b*:4,5-*b'*]dithiophene-4,8-dione (2.0 g, 9.08 mmol), KOH (1.33 g, 23.61 mmol) and zinc powder (1.49 g, 22.70 mmol) in water (50 mL) was heated to reflux with stirring for 2h. Then 1-bromopentane (3.15 g, 20.88 mmol) and tetrabutylammonium bromide (0.55 g, 1.36 mmol) were added into the reacting solution and continued to react for 12h at 80°C. After cooling to room temperature, the mixture was washed by water and the product extracted by CH<sub>2</sub>Cl<sub>2</sub>. The organic layer was dried over anhydrous MgSO<sub>4</sub> and filtered through a funnel, and condensed on a rotary evaporator. The crude product was purified by silica-gel column chromatography with elution of CH<sub>2</sub>Cl<sub>2</sub>/petroleum ether (1/4, v/v) to yield **2** (2.79 g, 85%). **3** was synthesized according to the same procedure used for **1**: **2** (1.0 g, 2.76

mmol), *n*-butyllithium (5.5 mL, 11.03 mmol), THF (30 mL), trimethyl borate (1.85 mL, 16.55 mmol). It was dried in vacuum under argon to yield **3** (0.66 g, 53%).

## 2.2. Synthesis of triphenylene precursors M0-1 - M0-4 (Schemes S3-S4)

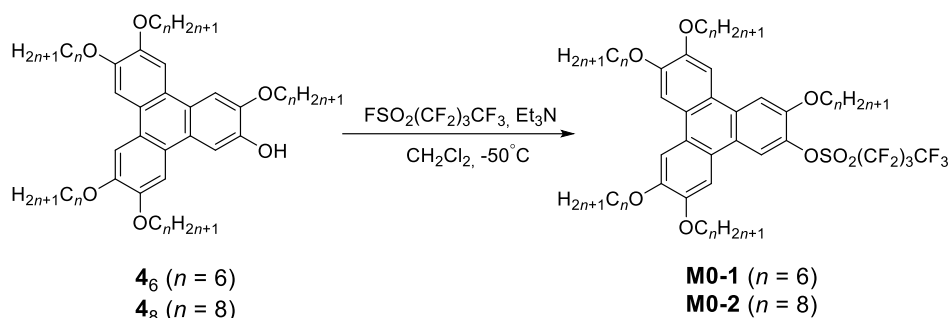

**Scheme S3:** Synthetic procedure of TP precursor **M0-1** and **M0-2**.

**M0-1:** Under argon, a solution of **4<sub>6</sub>**<sup>[1]</sup> (3.0g, 0.0040 mol) in CH<sub>2</sub>Cl<sub>2</sub> (150 mL), was cooled to -50°C, and were successively added, Et<sub>3</sub>N (5.60 mL, 0.0403 mol) and nonafluorobutanesulfonyl fluoride (2.84 mL, 0.0161 mol). The mixture was stirred at -50°C for 1h, and then maintained at room temperature for 12h. Water was then added, the mixture extracted with CH<sub>2</sub>Cl<sub>2</sub>, dried over MgSO<sub>4</sub>, and the organic solvent removed under vacuum. The residue was purified by silica column chromatography with elution of CH<sub>2</sub>Cl<sub>2</sub>/petroleum ether (1:2, v/v), and crystallized in EtOAc-EtOH to yield a white solid<sup>[2]</sup> (3.75g, 90.65%). <sup>1</sup>H NMR (CDCl<sub>3</sub>, TMS, 400MHz) δ (ppm): 8.16 (s, 1H), 7.83 (s, 1H), 7.78 (s, 3H), 7.68 (s, 1H), 4.28-4.20 (m, 10H), 2.00-1.94 (m, 10H), 1.60-1.57 (m, 10H), 1.42-1.37 (m, 20H), 0.95 (t, *J* = 7.0 Hz, 15H). <sup>13</sup>C NMR (CDCl<sub>3</sub>, 100MHz) δ (ppm): 150.29, 149.40, 149.37, 148.97, 148.87, 138.44, 129.44, 125.10, 123.40, 122.77, 122.16, 116.39, 107.91, 107.15, 106.55, 106.37, 106.29, 69.87, 69.74, 69.35, 69.29, 31.69, 31.68, 31.63, 31.57, 29.42, 29.39, 29.35, 29.29, 29.03, 25.85, 25.84, 25.76, 25.58, 22.66, 22.61, 22.56, 14.04, 14.00, 13.97. <sup>19</sup>F NMR (CDCl<sub>3</sub>, 376 MHz) δ (ppm): -80.64 (t, *J* = 9.7 Hz, 3F, CF<sub>3</sub>), -109.74 (t, *J* = 13.8 Hz, 2F, SCF<sub>2</sub>), -120.71 – -120.79 (m, 2F, CF<sub>2</sub>), -120.80 – -120.89 (m, 2F, CF<sub>2</sub>).

**M0-2** were synthesized accordingly to the above method. **4<sub>8</sub>** (3.0 g, 0.0034 mol), Et<sub>3</sub>N (4.71 mL, 0.0339 mol), nonafluorobutanesulfonyl fluoride (2.39 mL, 0.0136 mmol): **M0-2** (3.33 g, 84.1%). <sup>1</sup>H NMR (CDCl<sub>3</sub>, TMS, 400MHz) δ (ppm): 8.14 (s, 1H), 7.79 (s, 1H), 7.75 (s, 3H), 7.65 (s, 1H), 4.24-4.19 (m, 10H), 1.95 (s, 10H), 1.59 (s, 10H), 1.43-1.27 (m, 40H), 0.91 (t, *J* = 4.0 Hz, 15H). <sup>13</sup>C NMR (CDCl<sub>3</sub>, 100 MHz) δ (ppm): 150.21, 149.31, 149.29, 148.89, 148.78, 138.36, 129.38, 125.03, 123.32, 122.71, 122.68, 122.09, 116.33, 107.78, 107.02, 106.40, 106.24, 106.12, 69.81, 69.69, 69.29, 69.21, 31.87, 31.83, 31.82, 29.51, 29.48, 29.46, 29.40, 29.36, 29.32, 29.23, 29.08, 26.21, 26.11, 25.91, 22.70, 22.69, 22.67, 14.11, 14.08. <sup>19</sup>F NMR (CDCl<sub>3</sub>, 376 MHz) δ (ppm): -80.65 (t, *J* = 9.3 Hz, 3F, CF<sub>3</sub>), -109.82 (t, *J* = 12.2 Hz, 2F, SCF<sub>2</sub>), -120.80 (s, 2F, CF<sub>2</sub>), -125.86 – -125.92 (m, 2F, CF<sub>2</sub>).

**M0-3:** To a stirred solution of 3,3',4,4'-tetra(methoxy)-1,1-biphenyl<sup>[3]</sup> (500.0 mg, 1.823 mmol) and 2-bromoanisole (511.4 mg, 2.73 mmol) in dry CH<sub>2</sub>Cl<sub>2</sub> (30.0 mL), a solution of FeCl<sub>3</sub> (886.9 mg, 5.468 mmol) in CH<sub>3</sub>NO<sub>2</sub> (1.0 mL) was added dropwise at room temperature. After around 0.5h, methanol (5 mL) and water (5 mL) were added to quench the reaction. The extraction with CH<sub>2</sub>Cl<sub>2</sub> and purification by silica gel column chromatography (light petroleum/CH<sub>2</sub>Cl<sub>2</sub>, 1.5:1, v/v) and recrystallization in ethyl acetate and ethanol yielded a yellow solid, **6** (533.2 mg, 64%). Subsequently, under argon, **6** (500.0 mg, 1.093 mmol) was added to a reaction tube, stirring with dry CH<sub>2</sub>Cl<sub>2</sub> (10.0 mL). The above mixture was placed and stirred at -78 °C, then

<sup>[1]</sup> S. Kumar, B. Lakshmi. A convenient and economic method for the synthesis of monohydroxy-pentaalkoxy- and hexaalkoxytriphenylene discotics. *Tetrahedron Lett.*, 2005, 46, 2603-2605.

<sup>[2]</sup> S. J. Mahoney, M. M. Ahmida, H. Kayal, N. Fox, Y. Shimizu, S. H. Eichhorn. Synthesis, mesomorphism and electronic properties of nonaflate and cyano-substituted pentyloxy and 3-methylbutyloxy triphenylenes. *J. Mater. Chem.*, 2009,19, 9221-9232.

<sup>[3]</sup> J. F. Hang, H. Lin, K. Q. Zhao, P. Hu, B. Q. Wang, H. Monobe, C. H. Zhu, B. Donnio. Butterfly Mesogens Based on Carbazole, Fluorene or Fluorenone: Mesomorphous, Gelling, Photophysical, and Photoconductive Properties. *Eur. J. Org. Chem.*, 2021, 1989-2002.

$\text{BBr}_3$  (0.62 mL, 6.56 mmol) was injected into the reaction system, and kept stirring overnight. It was extracted by ethyl acetate, dried with  $\text{MgSO}_4$ , organic solvent evaporated under vacuum to yield the black solid, 11-bromotriphenylene-2,3,6,7,10-pentaol. Soon afterwards, in a 100 mL round bottom flask, all 11-bromotriphenylene-2,3,6,7,10-pentaol, *n*-bromohexane (1.28 g, 7.748 mmol),  $\text{K}_2\text{CO}_3$  (5.35 g, 38.741 mmol), zinc powder (211.1 mg, 3.23 mmol), KI (21.5 mg, 0.129 mmol) were introduced and DMF (20.0 mL) added. The reaction was heated to  $90^\circ\text{C}$  and let stirred for 24h. The mixture was cooled and poured in a 500 mL beaker in ice-water and dilute hydrochloric acid added to the solution till acidity, stirred, and filtered in a Buchner funnel. The solution was dried and solvent evaporated. The product was purified by silica gel column chromatography (dichloromethane/petroleum ether 1:1.5 v/v) and recrystallized from ethanol and ethyl acetate to obtain white powder **M0-3** (618.4 g, 70%).  $^1\text{H}$  NMR ( $\text{CDCl}_3$ , TMS, 400MHz)  $\delta$  (ppm): 8.57 (s, 1H), 7.84 (s, 1H), 7.78 (s, 3H), 7.77 (s, 1H), 4.26-4.21 (m, 10H), 2.00-1.90 (m, 10H), 1.65-1.57 (m, 10H), 1.41-1.34 (m, 20H), 0.96-0.92 (m, 15H).  $^{13}\text{C}$  NMR ( $\text{CDCl}_3$ , 100 MHz)  $\delta$  (ppm): 153.50, 149.90, 149.28, 148.94, 148.72, 129.25, 127.66, 124.75, 124.01, 123.05, 122.74, 122.63, 112.16, 107.54, 107.12, 106.68, 106.03, 105.57, 69.78, 69.73, 69.41, 69.38, 69.20, 31.69, 31.67, 31.61, 29.42, 29.40, 29.34, 29.33, 29.18, 25.85, 25.83, 25.82, 25.80, 22.66, 22.63, 14.06.

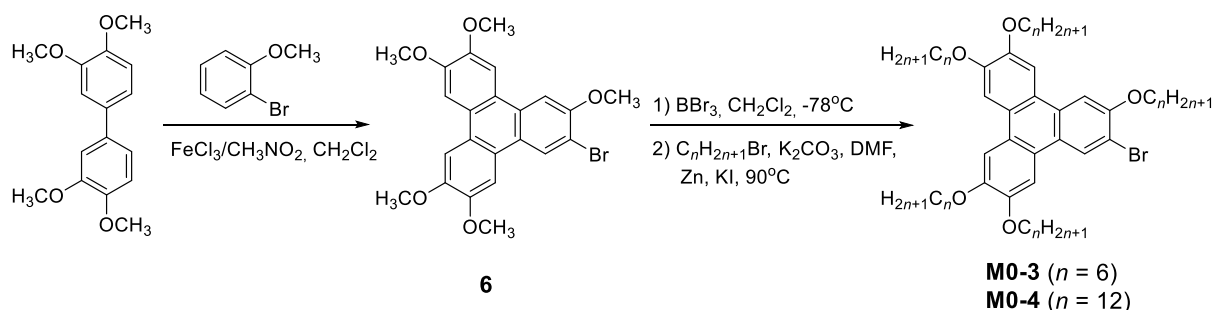

**Scheme S4:** Synthetic procedure of TP precursor **M0-3** and **M0-4**.

**M0-4:** As for compound **M0-3**: **6** (500.0 mg, 1.093 mmol),  $\text{BBr}_3$  (0.62 mL, 6.56 mmol), 1-bromododecane (1.93 g, 7.748 mmol),  $\text{K}_2\text{CO}_3$  (5.36 g, 38.741 mmol), zinc powder (211.1 mg, 3.23 mmol), KI (21.5 mg, 0.129 mmol). Silica gel column chromatography (eluting with light petroleum/ $\text{CH}_2\text{Cl}_2$ , 1.5:1, v/v) and recrystallization in ethyl acetate and ethanol yielded a white solid **M0-4** (994.1 mg, 74%).  $^1\text{H}$  NMR ( $\text{CDCl}_3$ , TMS, 400MHz)  $\delta$  (ppm): 8.56 (s, 1H), 7.83 (s, 1H), 7.78 (d,  $J = 1.9$  Hz, 3H), 7.75 (s, 1H), 4.25-4.21 (m, 10H), 2.00-1.90 (m, 10H), 1.63-1.54 (m, 10H), 1.43-1.27 (m, 80H), 0.88 (t,  $J = 6.9$  Hz, 15H).  $^{13}\text{C}$  NMR ( $\text{CDCl}_3$ , 100 MHz)  $\delta$  (ppm): 153.53, 149.91, 149.30, 148.96, 148.73, 129.28, 127.69, 124.78, 124.03, 123.08, 122.77, 122.65, 112.19, 107.59, 107.16, 106.72, 106.08, 105.60, 69.81, 69.75, 69.43, 69.41, 69.22, 31.93, 29.74, 29.71, 29.69, 29.64, 29.56, 29.52, 29.47, 29.46, 29.39, 29.38, 29.23, 26.21, 26.19, 26.16, 26.14, 22.70, 14.13.

### 2.3. Synthesis of triphenylene derivatives M1-M5 (Scheme S5)

**M1:** Under argon, **M0-1** (400.0 mg, 0.39 mmol), 2-thiophenylboric acid (64.77 mg, 0.51 mmol),  $\text{K}_2\text{CO}_3$  (1076.35 mg, 7.79 mmol), and  $\text{Pd}(\text{PPh}_3)_4$  (45.0 mg, 0.039 mmol) were added to a reaction tube. Degassed water (2 mL) and THF (8 mL) were injected into the reaction mixture. The mixture was stirred at  $70^\circ\text{C}$  for 24h. Then, it was cooled, extracted with  $\text{CH}_2\text{Cl}_2$  and dried with  $\text{MgSO}_4$ . The organic solvent was removed by distillation, and the residue was purified by silica gel column chromatography (light petroleum/ $\text{CH}_2\text{Cl}_2$  2:1, v/v) to yield **M1** as a yellow solid (284.33 mg, 90%).  $^1\text{H}$  NMR ( $\text{CDCl}_3$ , TMS, 400MHz)  $\delta$  (ppm): 8.65 (s, 1H), 7.93 (s, 1H), 7.87 (s, 1H), 7.81 (s, 3H), 7.70 (d,  $J = 2.8$  Hz, 1H), 7.42 (d,  $J = 4.9$  Hz, 1H), 7.19 (dd,  $J = 5.1, 3.7$  Hz, 1H), 4.31-4.23 (m, 10H), 2.05-1.95 (m, 10H), 1.65-1.57 (m, 10H), 1.47-1.36 (m, 20H), 0.95 (t,  $J = 6.7$  Hz, 15H).  $^{13}\text{C}$  NMR ( $\text{CDCl}_3$ , 100 MHz)  $\delta$  (ppm): 153.92, 149.82, 149.21, 148.84, 148.75, 139.96, 129.26, 126.81, 125.63, 125.59, 124.85, 123.78, 123.17, 123.14, 122.99, 122.90, 122.76, 107.86, 107.43, 106.89, 106.64, 104.48, 69.85, 69.78, 69.45, 69.37, 68.93, 31.69, 31.66, 29.44, 29.38, 29.31, 26.04, 25.86, 25.85, 22.67, 22.61, 14.06. Elemental analysis: calculated for  $\text{C}_{52}\text{H}_{74}\text{O}_5\text{S}$  (811.219), C 76.99%, H 9.20%, S 3.95%; found, C 76.84%, H 9.01%, S 3.94%.

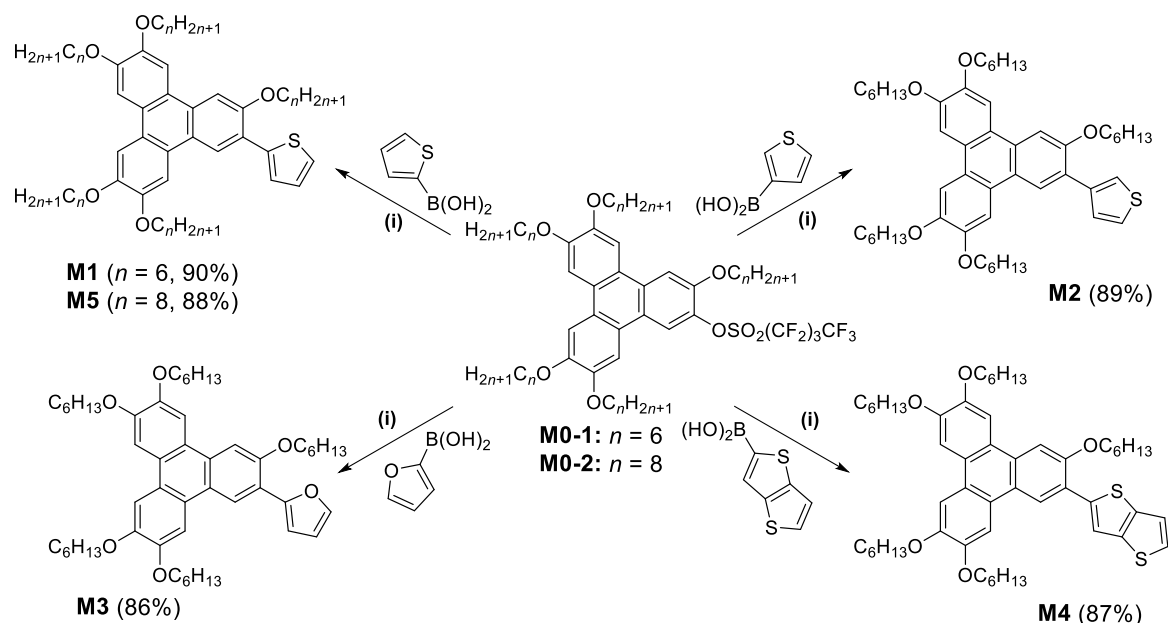

**Scheme S5:** Synthetic procedure for the monomeric species **M1-M5**: (i) Pd(PPh<sub>3</sub>)<sub>4</sub>, K<sub>2</sub>CO<sub>3</sub>, THF/H<sub>2</sub>O.

**M2-M5** were synthesized according to the same procedure used for **M1**.

**M2:** The coupling of **M0-1** (400.0 mg, 0.39 mmol) with 3-thiophenylboronic acid (64.77 mg, 0.51 mmol) resulted in **M2** (723.61 mg, 89.2%). <sup>1</sup>H NMR (CDCl<sub>3</sub>, TMS, 400MHz) δ (ppm): 8.51 (s, 1H), 7.94 (s, 1H), 7.90 (s, 1H), 7.83 (s, 3H), 7.79 (s, 1H), 7.64 (s, 1H), 7.44 (s, 1H), 4.25-4.24 (m, 10H), 1.96 (s, 10H), 1.60 (s, 10H), 1.42 (s, 20H), 0.96 (s, 15H). <sup>13</sup>C NMR (CDCl<sub>3</sub>, 100 MHz) δ (ppm): 154.81, 149.71, 149.19, 148.75, 148.72, 138.69, 129.18, 128.90, 124.82, 124.76, 124.35, 124.24, 123.87, 123.33, 123.08, 122.75, 107.80, 107.40, 106.88, 106.57, 104.63, 69.80, 69.76, 69.44, 69.37, 68.62, 31.68, 31.59, 29.43, 29.38, 29.30, 25.95, 25.85, 22.66, 22.60, 14.06. Elemental analysis: calculated for C<sub>52</sub>H<sub>74</sub>O<sub>5</sub>S (811.219), C 76.99%, H 9.20%, S 3.95%; found, C 77.29%, H 9.36%, S 3.95%.

**M3:** The coupling of **M0-1** (400.0 mg, 0.39 mmol) with 2-furanylboronic acid (56.65 mg, 0.51 mmol) resulted in **M3** (264.75 mg, 85.5%). <sup>1</sup>H NMR (CDCl<sub>3</sub>, TMS, 400MHz) δ (ppm): 8.90 (s, 1H), 8.03 (s, 1H), 7.86 (s, 1H), 7.81 (s, 2H), 7.78 (s, 1H), 7.60 (s, 1H), 7.13 (s, 1H), 6.59 (s, 1H), 4.30-4.24 (m, 10H), 2.04-1.96 (m, 10H), 1.62-1.60 (m, 10H), 1.42 (s, 20H), 0.96 (s, 15H). <sup>13</sup>C NMR (CDCl<sub>3</sub>, 100 MHz) δ (ppm): 153.59, 150.59, 149.74, 149.23, 148.75, 148.67, 141.15, 128.82, 124.88, 124.08, 123.05, 123.02, 122.67, 120.32, 119.18, 111.93, 110.30, 107.86, 107.34, 106.86, 106.81, 103.94, 69.84, 69.77, 69.42, 69.35, 68.44, 31.70, 31.69, 29.45, 29.42, 29.40, 29.38, 26.07, 25.85, 22.67, 22.61, 14.06. Elemental analysis: calculated for C<sub>52</sub>H<sub>74</sub>O<sub>6</sub> (795.158), C 78.55%, H 9.38%; found, C 78.21%, H 9.54%.

**M4:** The coupling of **M0-1** (400.0 mg, 0.39 mmol) with thieno[3,2-*b*]thiophene-2-boronic acid (93.17 mg, 0.51 mmol) resulted in **M4** (294.84 mg, 87.3%). <sup>1</sup>H NMR (CDCl<sub>3</sub>, TMS, 400MHz) δ (ppm): 8.58 (s, 1H), 7.87 (s, 2H), 7.80 (s, 1H), 7.76 (s, 2H), 7.72 (s, 1H), 7.40 (d, *J* = 5.1 Hz, 1H), 7.32 (d, *J* = 5.1 Hz, 1H), 4.26-4.21 (m, 10H), 2.04-1.92 (m, 10H), 1.62-1.60 (m, 10H), 1.43 (s, 20H), 0.96 (t, *J* = 6.4 Hz, 10H). <sup>13</sup>C NMR (CDCl<sub>3</sub>, 100 MHz) δ (ppm): 153.90, 149.80, 149.16, 148.78, 148.64, 142.43, 139.43, 139.38, 129.37, 126.60, 124.86, 123.60, 123.08, 123.04, 122.95, 122.81, 122.72, 119.47, 118.06, 107.70, 107.27, 106.68, 106.36, 104.43, 69.77, 69.72, 69.35, 69.26, 68.91, 31.73, 31.72, 31.71, 31.70, 31.66, 29.45, 29.39, 29.29, 26.01, 25.89, 25.88, 25.86, 22.69, 22.67, 22.60, 14.09, 14.07. Elemental analysis: calculated for C<sub>54</sub>H<sub>74</sub>O<sub>5</sub>S<sub>2</sub> (867.301), C 74.78%, H 8.60%, S 7.39%; found, C 74.30%, H 8.26%, S 7.52%.

**M5:** The coupling of **M0-2** (400.0 mg, 0.34 mmol) with 2-thiophenylboronic acid (57.0 mg, 0.45 mmol) resulted in **M5** (287.5 mg, 88.2%). <sup>1</sup>H NMR (CDCl<sub>3</sub>, TMS, 400MHz) δ (ppm): 8.65 (s, 1H), 7.94 (s, 1H), 7.87 (s, 1H), 7.81 (s, 3H), 7.70 (d, *J* = 3.8 Hz, 1H), 7.42 (d, *J* = 4.8 Hz, 1H), 7.19 (dd, *J* = 4.8, 3.8 Hz, 1H), 4.30-4.23 (m, 10H), 2.03-1.96 (m, 10H), 1.61-1.58 (m, 10H), 1.44-1.34 (m, 40H), 0.92 (t, *J* = 8.0 Hz, 15H). <sup>13</sup>C NMR (CDCl<sub>3</sub>, 100 MHz) δ (ppm): 153.95, 149.87, 149.26,

148.90, 148.80, 140.01, 129.28, 126.82, 125.64, 125.56, 124.90, 123.83, 123.19, 123.05, 122.94, 122.80, 107.98, 107.55, 107.02, 106.78, 104.55, 69.92, 69.85, 69.52, 69.44, 68.98, 31.87, 31.84, 29.50, 29.46, 29.45, 29.35, 29.26, 26.38, 26.22, 22.70, 14.10. Elemental analysis: calculated for C<sub>62</sub>H<sub>94</sub>O<sub>5</sub>S (951.489), C 78.26%, H 9.96%, S 3.37%; found, C 78.31%, H 9.71%, S 3.21%.

## 2.4. Synthesis of the unsymmetrical fused heterocycles **Tp<sup>6</sup>T<sup>6</sup>** and **Tp<sup>6</sup>Dt<sup>6</sup>** (Schemes S6-S7)

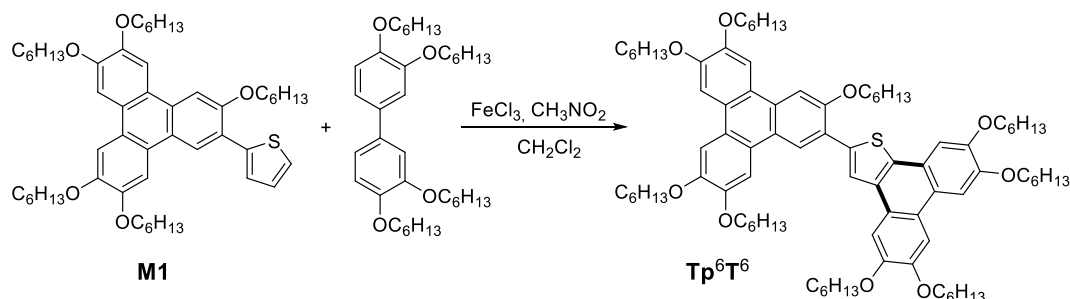

**Scheme S6:** Synthetic procedure for **Tp<sup>6</sup>T<sup>6</sup>**.

**Tp<sup>6</sup>T<sup>6</sup>:** **Tp<sup>6</sup>T<sup>6</sup>** was synthesized by intermolecular cyclodehydrogenation (cross oxidation). To a solution of 3,3',4,4'-tetra(hexyloxy)-1,1'-biphenyl<sup>[4]</sup> (120.0 mg, 0.220 mmol) and stirring FeCl<sub>3</sub> (43.0 mg, 0.250 mmol) in CH<sub>3</sub>NO<sub>2</sub> (1 mL) in CH<sub>2</sub>Cl<sub>2</sub> (8 mL), were added with **M1** (50 mg, 0.062 mmol) in CH<sub>2</sub>Cl<sub>2</sub>. After around 1h, cold CH<sub>3</sub>OH (2 mL) and H<sub>2</sub>O (2 mL) were added. It was extracted by CH<sub>2</sub>Cl<sub>2</sub>, dried with MgSO<sub>4</sub>, organic solvent evaporated under vacuum, the residue purified by silica column with elution of light petroleum/CH<sub>2</sub>Cl<sub>2</sub> 1:1, v/v), and recrystallized from EtOAc-EtOH to get a yellow solid **Tp<sup>6</sup>T<sup>6</sup>** (10.0 mg, 24%) and some amount of dimer **Tp<sup>6</sup>Th<sub>2</sub>Tp<sup>6</sup>** (20.5 mg, 41%). <sup>1</sup>H NMR (CDCl<sub>3</sub>, TMS, 600MHz) δ (ppm): δ 8.80 (s, 1H), 8.43 (s, 1H), 8.08 (s, 1H), 7.94 (s, 1H), 7.91 (s, 2H), 7.89 (s, 1H), 7.85 (s, 2H), 7.74 (s, 1H), 7.50 (s, 1H), 4.38 (t, *J* = 6.4 Hz, 2H), 4.31-4.23 (m, 16H), 2.11-2.06 (m, 2H), 1.99-1.94 (m, 16H), 1.74-1.69 (m, 2H), 1.63-1.56 (m, 16H), 1.46-1.36 (m, 36H), 0.96-0.88 (m, 27H). <sup>13</sup>C NMR (C<sub>2</sub>D<sub>2</sub>Cl<sub>4</sub>, 151 MHz) δ (ppm): 154.43, 150.18, 149.57, 149.36, 149.31, 148.98, 148.58, 138.01, 134.25, 133.62, 129.44, 124.88, 123.78, 123.63, 123.39, 123.11, 122.99, 122.88, 122.71, 122.68, 122.31, 122.18, 108.60, 108.15, 108.10, 108.07, 107.39, 106.92, 104.70, 70.16, 70.13, 69.97, 69.63, 69.23, 68.92, 31.66, 31.59, 31.57, 29.43, 29.41, 29.40, 29.38, 29.35, 29.32, 29.22, 26.08, 25.77, 25.76, 25.75, 25.71, 22.63, 22.60, 22.57, 14.12, 14.09, 14.08. HRMS (MALDI): [M+H]<sup>+</sup> calcd for C<sub>88</sub>H<sub>128</sub>O<sub>9</sub>S, *m/z*: 1360.9279 (100.0%), 1361.9313 (95.2%), 1362.9346 (44.8%), 1364.9413 (3.1%); found, 1361.9311, 1360.9278, 1362.9357, 1363.9420. Elemental analysis: calculated for C<sub>88</sub>H<sub>128</sub>O<sub>9</sub>S (1362.04), C 77.60%, H 9.47%, S 2.35%; found, C 77.69%, H 9.31%, S 2.45%.

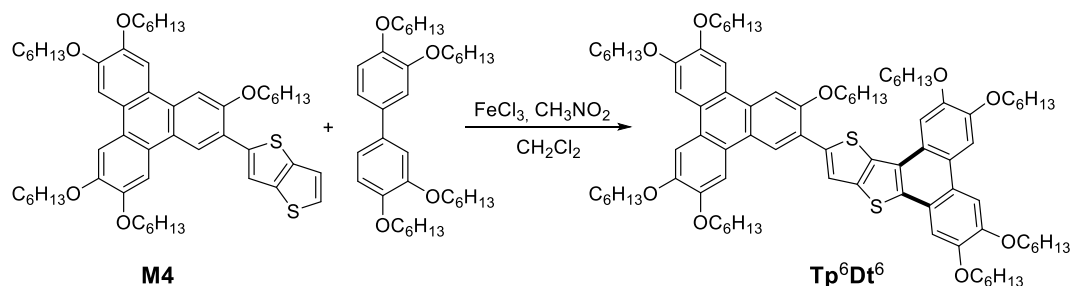

**Scheme S7:** Synthetic procedure for **Tp<sup>6</sup>Dt<sup>6</sup>**.

**Tp<sup>6</sup>Dt<sup>6</sup>** was synthesized according to the same procedure used for **Tp<sup>6</sup>T<sup>6</sup>**. **M4** (50.0 mg, 0.058 mmol), FeCl<sub>3</sub> (38.0 mg, 0.230 mmol), CH<sub>3</sub>NO<sub>2</sub> (1.0 mL), 3,3',4,4'-tetra(hexyloxy)-1,1'-biphenyl (120.0 mg, 0.220 mmol). Silica gel column chromatography (eluting with light petroleum/CH<sub>2</sub>Cl<sub>2</sub>, 1:1, v/v) and recrystallization in ethyl acetate and ethanol yielded a yellow solid **Tp<sup>6</sup>Dt<sup>6</sup>** (26.3 mg, 64%) and small amount of dimer **Tp<sup>6</sup>Tt<sub>2</sub>Tp<sup>6</sup>** (9.5 mg, 19%). <sup>1</sup>H NMR (CDCl<sub>3</sub>, TMS, 600MHz) δ (ppm): 8.78 (s, 1H), 8.02 (s, 1H), 8.02 (s, 1H), 7.96 (s, 1H), 7.92 (s, 1H), 7.90 (s,

<sup>[4]</sup> K. Q. Zhao, Y. Gao, W. H. Yu, P. Hu, B. Q. Wang, B. Heinrich, B. Donnio. Discogens Possessing Aryl Side Groups Synthesized by Suzuki Coupling of Triphenylene Triflates and Their Self-Organization Behavior. *Eur.J.Org. Chem.*, 2016, 2802-2814.

3H), 7.84 (s, 2H), 7.42 (s, 1H), 4.38 (t,  $J = 6.3$  Hz, 4H), 4.33-4.20 (m, 14H), 2.12-2.08 (m, 2H), 2.03-1.93 (m, 16H), 1.67-1.57 (m, 18H), 1.46-1.35 (m, 36H), 0.97-0.88 (m, 27H).  $^{13}\text{C}$  NMR ( $\text{CDCl}_3$ , 151 MHz)  $\delta$  (ppm): 150.79, 146.84, 146.34, 146.17, 146.12, 145.84, 145.65, 145.15, 138.70, 133.60, 132.85, 126.43, 123.34, 121.85, 120.55, 120.11, 120.09, 120.06, 120.01, 119.94, 119.84, 119.78, 119.64, 118.71, 115.17, 104.85, 104.32, 104.20, 104.12, 104.04, 103.75, 103.61, 102.83, 101.60, 66.77, 66.74, 66.69, 66.63, 66.31, 66.29, 65.92, 65.73, 28.56, 28.52, 28.50, 28.49, 28.46, 28.42, 26.29, 26.27, 26.25, 26.21, 26.19, 26.14, 26.01, 22.87, 22.79, 22.74, 22.68, 22.67, 22.64, 19.47, 10.86, 10.83. HRMS (MALDI):  $[\text{M}+\text{H}]^+$  calcd for  $\text{C}_{90}\text{H}_{128}\text{O}_9\text{S}_2$ ,  $m/z$ : 1416.9000 (100.0%), 1417.9033 (97.3%), 1418.9067 (46.9%), 1419.9076 (1.8%); found, 1417.9032, 1416.8990, 1418.9057, 1419.9079. Elemental analysis: calculated for  $\text{C}_{90}\text{H}_{128}\text{O}_9\text{S}_2$  (1418.125), C 76.23%, H 9.10%, S 4.52%; found, C 76.14%, H 9.06%, S 4.45%.

## 2.5. Synthesis of the symmetrical bridged dimers by Scholl cyclohydrogenation (Schemes S8-S9)

**$\text{Tp}^6\text{Th}_2\text{Tp}^6$** : To a stirred solution of **M1** (100.0 mg, 0.120 mmol) in dry  $\text{CH}_2\text{Cl}_2$  (15 mL), a solution of  $\text{FeCl}_3$  (42.0 mg, 0.260 mmol) in  $\text{CH}_3\text{NO}_2$  (1.0 mL) was added dropwise at room temperature. After around 1h, methanol (3 mL) and water (3 mL) were added to quench the reaction. The extraction with  $\text{CH}_2\text{Cl}_2$  and purification by silica gel column chromatography (light petroleum/ $\text{CH}_2\text{Cl}_2$ , 1:1, v/v) and recrystallization in ethyl acetate and ethanol yielded a yellow solid,  **$\text{Tp}^6\text{Th}_2\text{Tp}^6$**  (75.4 mg, 76%).  $^1\text{H}$  NMR ( $\text{CDCl}_3$ , TMS, 600MHz)  $\delta$  (ppm): 8.69 (s, 2H), 7.98 (s, 2H), 7.89 (s, 2H), 7.84 (s, 2H), 7.83 (s, 4H), 7.67 (d,  $J = 3.8$  Hz, 2H), 7.32 (d,  $J = 3.8$  Hz, 2H), 4.34 (t,  $J = 6.3$  Hz, 4H), 4.29-4.22 (m, 16H), 2.09-2.04 (m, 4H), 1.99-1.93 (m, 16H), 1.72-1.67 (m, 4H), 1.63-1.59 (m, 16H), 1.48-1.40 (m, 40H), 0.97-0.93 (m, 30H).  $^{13}\text{C}$  NMR ( $\text{C}_2\text{D}_2\text{Cl}_4$ , 151 MHz)  $\delta$  (ppm): 153.76, 150.08, 149.37, 149.10, 148.91, 138.55, 137.53, 129.15, 126.41, 124.80, 123.57, 123.46, 123.14, 122.82, 122.59, 122.46, 122.35, 108.48, 107.94, 107.35, 104.46, 70.12, 69.96, 69.73, 69.61, 69.05, 31.65, 31.61, 29.42, 29.39, 29.35, 29.24, 26.08, 25.77, 22.65, 22.63, 14.13, 14.10. HRMS (MALDI):  $[\text{M}]^+$  calcd for  $\text{C}_{104}\text{H}_{146}\text{O}_{10}\text{S}_2$ ,  $m/z$ : 1620.0391 (100.0%), 1619.0357 (88.9%), 1621.0425 (55.7%), 1622.0458 (18.9%); found, 1620.0381, 1619.0358, 1621.0467, 1622.0467. Elemental analysis: calculated for  $\text{C}_{104}\text{H}_{146}\text{O}_{10}\text{S}_2$  (1620.42), C 77.09%, H 9.08%, S 3.96%; found, C 76.95%, H 9.19%, S 4.03%.

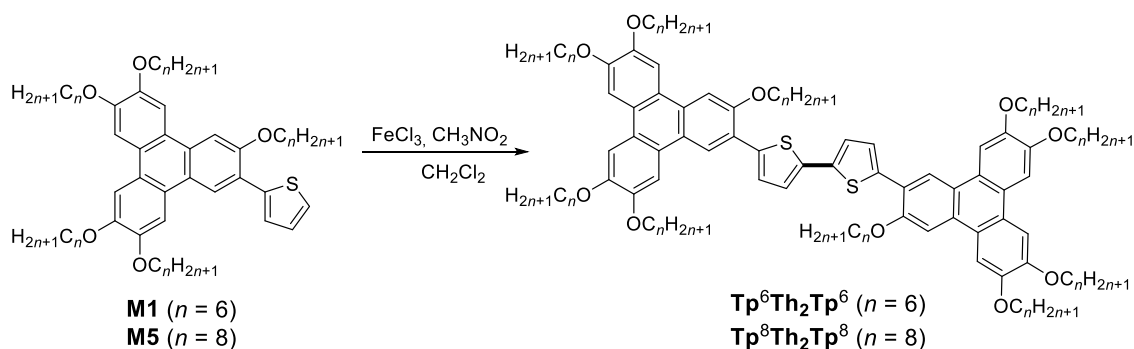

**Scheme S8:** Synthetic procedure for  **$\text{Tp}^6\text{Th}_2\text{Tp}^6$**  and  **$\text{Tp}^8\text{Th}_2\text{Tp}^8$** .

**$\text{Tp}^8\text{Th}_2\text{Tp}^8$** : As for  **$\text{Tp}^6\text{Th}_2\text{Tp}^6$** . **M5** (100.0 mg, 0.105 mmol),  $\text{CH}_2\text{Cl}_2$  (15 mL),  $\text{FeCl}_3$  (37.51 mg, 0.231 mmol),  $\text{CH}_3\text{NO}_2$  (1.0 mL). Silica gel column chromatography (eluting with light petroleum/ $\text{CH}_2\text{Cl}_2$ , 1:1, v/v) and recrystallization in ethyl acetate and ethanol yielded a yellow solid  **$\text{Tp}^8\text{Th}_2\text{Tp}^8$**  (72.7 mg, 73%).  $^1\text{H}$  NMR ( $\text{CDCl}_3$ , TMS, 600MHz)  $\delta$  (ppm): 8.69 (s, 2H), 7.98 (s, 2H), 7.90 (s, 2H), 7.85 (s, 2H), 7.83 (s, 4H), 7.67 (d,  $J = 3.4$  Hz, 2H), 7.33 (d,  $J = 3.4$  Hz, 2H), 4.35 (t,  $J = 6.2$  Hz, 4H), 4.28-4.23 (m, 16H), 2.09-2.04 (m, 4H), 1.99-1.93 (m, 16H), 1.71-1.66 (m, 4H), 1.63-1.58 (m, 16H), 1.50-1.32 (m, 80H), 0.92-0.87 (m, 30H).  $^{13}\text{C}$  NMR ( $\text{CDCl}_3$ , 100 MHz)  $\delta$  (ppm): 153.85, 149.86, 149.25, 148.91, 148.76, 138.79, 137.72, 129.29, 126.34, 124.90, 123.76, 123.36, 123.21, 122.99, 122.83, 122.62, 122.50, 107.90, 107.49, 106.95, 106.80, 104.48, 69.89, 69.81, 69.48, 69.03, 31.90, 31.88, 29.55, 29.53, 29.53, 29.49, 29.37, 26.53, 26.25, 26.24, 22.70, 14.11. HRMS (MALDI):  $[\text{M}]^+$  calcd for  $\text{C}_{124}\text{H}_{186}\text{O}_{10}\text{S}_2$ ,  $m/z$ : 1900.3521 (100.0%), 1899.3487 (74.6%), 1901.3555 (66.5%), 1902.3588 (29.2%), 1903.3622 (8.7%); found, 1900.3520, 1901.3554, 1899.3481, 1902.3584, 1903.3624. Elemental analysis: calculated for  $\text{C}_{124}\text{H}_{186}\text{O}_{10}\text{S}_2$



(1900.96), C 78.35%, H 9.86%, S 3.37%; found, C 78.00%, H 9.97%, S 3.37%.

**Tp<sup>6</sup>β-Th<sub>2</sub>Tp<sup>6</sup>**, **Tp<sup>6</sup>Fu<sub>2</sub>Tp<sup>6</sup>**, and **Tp<sup>6</sup>Tt<sub>2</sub>Tp<sup>6</sup>** were synthesized according to the same procedure used for **Tp<sup>6</sup>Th<sub>2</sub>Tp<sup>6</sup>** (Scheme S9).

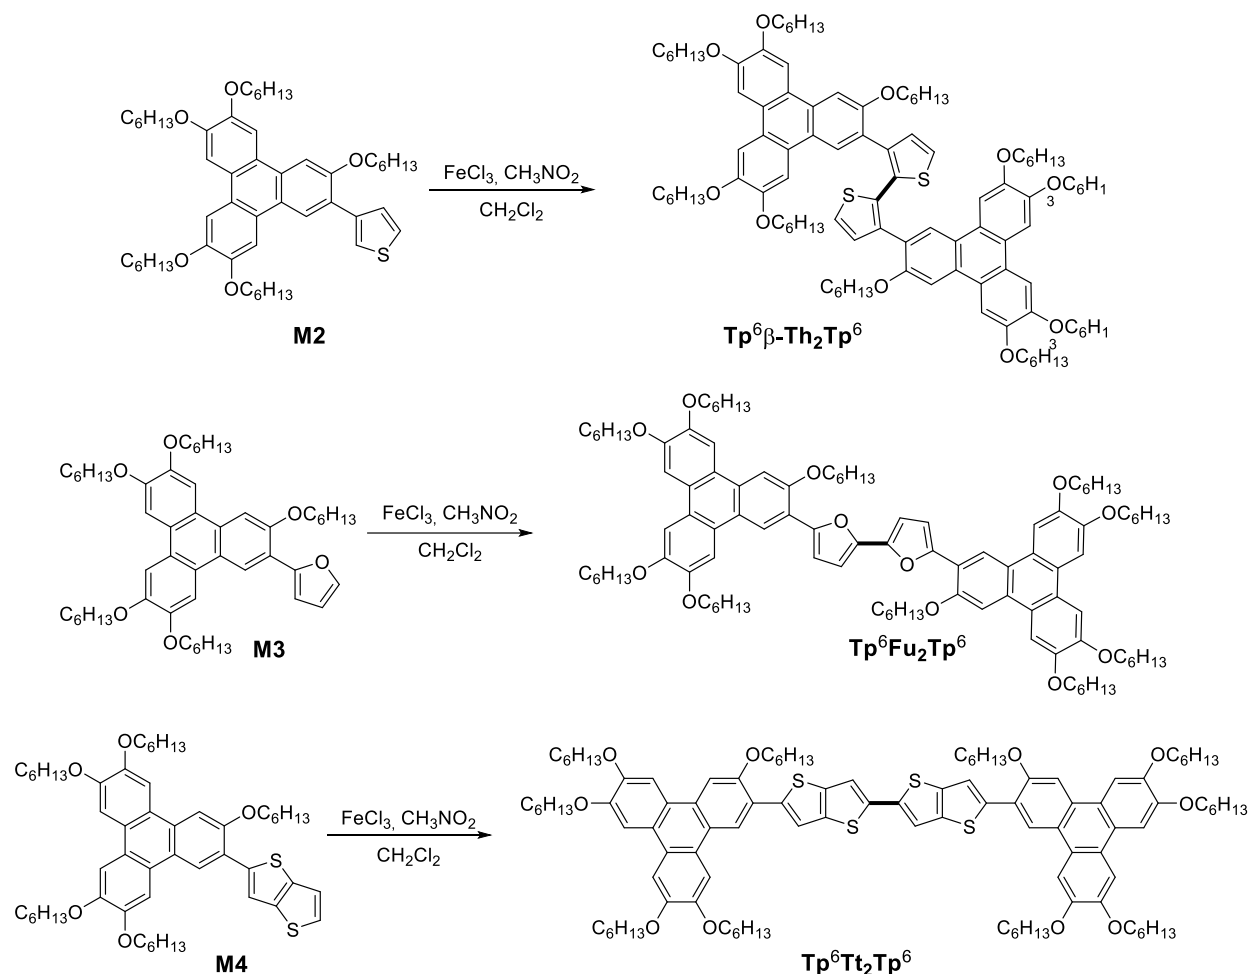

**Scheme S9:** Synthetic procedure for **Tp<sup>6</sup>β-Th<sub>2</sub>Tp<sup>6</sup>**, **Tp<sup>6</sup>Fu<sub>2</sub>Tp<sup>6</sup>**, and **Tp<sup>6</sup>Tt<sub>2</sub>Tp<sup>6</sup>**.

**Tp<sup>6</sup>β-Th<sub>2</sub>Tp<sup>6</sup>:** **M2** (100.0 mg, 0.120 mmol), CH<sub>2</sub>Cl<sub>2</sub> (15 mL), FeCl<sub>3</sub> (42.0 mg, 0.260 mmol), CH<sub>3</sub>NO<sub>2</sub> (1.0 mL). Silica gel column chromatography (eluting with light petroleum/CH<sub>2</sub>Cl<sub>2</sub>, 1:1, v/v) and recrystallization in ethyl acetate and ethanol yielded a yellow solid **Tp<sup>6</sup>β-Th<sub>2</sub>Tp<sup>6</sup>** (64.1 mg, 64%). <sup>1</sup>H NMR (CDCl<sub>3</sub>, TMS, 600MHz) δ (ppm): 7.85 (s, 2H), 7.77 (s, 2H), 7.71 (s, 2H), 7.55 (s, 2H), 7.32 (d, *J* = 5.2 Hz, 2H), 7.21 (s, 2H), 7.19 (d, *J* = 5.2 Hz, 2H), 7.07 (s, 2H), 4.23 (t, *J* = 6.4 Hz, 4H), 4.17 (s, 4H), 4.12 (t, *J* = 5.2 Hz, 4H), 3.87 (s, 4H), 3.08 (s, 4H), 1.99-1.82 (m, 16H), 1.63-1.34 (m, 50H), 1.22-1.16 (m, 4H), 1.06-1.01 (m, 10H), 0.97-0.92 (m, 24H), 0.86 (t, *J* = 7.3 Hz, 6H). <sup>13</sup>C NMR (CDCl<sub>3</sub>, 100 MHz) δ (ppm): 154.51, 149.42, 149.05, 148.43, 148.10, 136.89, 132.23, 131.72, 128.58, 126.00, 124.59, 124.26, 123.90, 123.46, 123.12, 122.15, 107.37, 107.02, 106.65, 105.25, 102.95, 69.80, 69.68, 69.40, 68.49, 67.41, 31.78, 31.75, 31.73, 31.58, 29.53, 29.49, 29.28, 28.45, 25.95, 25.91, 25.90, 25.87, 25.59, 22.71, 22.68, 22.60, 14.10, 14.06. HRMS (MALDI): [M]<sup>+</sup> calculated for C<sub>104</sub>H<sub>146</sub>O<sub>10</sub>S<sub>2</sub>, *m/z*: 1620.0391 (100.0%), 1619.0357 (88.9%), 1621.0425 (55.7%), 1622.0458 (18.9%); found, 1620.0381, 1619.0355, 1621.0416, 1622.0471. Elemental analysis: calculated for C<sub>104</sub>H<sub>146</sub>O<sub>10</sub>S<sub>2</sub> (1620.42), C 77.09%, H 9.08%, S 3.96%; found, C 76.75%, H 9.08%, S 3.96%.

**Tp<sup>6</sup>Fu<sub>2</sub>Tp<sup>6</sup>:** **M3** (100.0 mg, 0.120 mmol), CH<sub>2</sub>Cl<sub>2</sub> (15 mL), FeCl<sub>3</sub> (42.0 mg, 0.260 mmol), CH<sub>3</sub>NO<sub>2</sub> (1.0 mL). Silica gel column chromatography (eluting with light petroleum/CH<sub>2</sub>Cl<sub>2</sub>, 1:1, v/v) and recrystallization in ethyl acetate and ethanol yielded a yellow solid **Tp<sup>6</sup>Fu<sub>2</sub>Tp<sup>6</sup>** (66.9 mg, 67%). <sup>1</sup>H NMR (CDCl<sub>3</sub>, TMS, 600MHz) δ (ppm): 9.03 (s, 2H), 8.08 (s, 2H), 7.90 (s, 2H), 7.84 (s, 2H), 7.83 (s, 2H), 7.83 (s, 2H), 7.25 (d, *J* = 3.5 Hz, 2H), 6.87 (d, *J* = 3.5 Hz, 2H), 4.36 (t, *J* = 6.5 Hz, 4H), 4.26 (t, *J* = 6.5 Hz, 4H), 4.25 (t, *J* = 6.5 Hz, 4H), 4.21 (t, *J* = 6.6 Hz, 4H), 4.18 (t, *J* = 6.7 Hz, 4H), 2.10-

2.05 (m, 4H), 1.99-1.89 (m, 12H), 1.74-1.65 (m, 8H), 1.62-1.57 (m, 10H), 1.50-1.33 (m, 36H), 1.28-1.20 (m, 10H), 0.98-0.92 (m, 24H), 0.86 (t,  $J = 7.0$  Hz, 6H).  $^{13}\text{C}$  NMR ( $\text{CDCl}_3$ , 100 MHz)  $\delta$  (ppm): 153.75, 150.12, 149.84, 149.35, 148.77, 148.70, 145.29, 128.90, 125.01, 124.09, 123.07, 123.02, 122.78, 120.14, 118.87, 112.36, 107.99, 107.71, 107.63, 106.90, 106.54, 103.94, 69.94, 69.91, 69.44, 69.20, 68.51, 31.74, 31.72, 31.66, 29.50, 29.45, 29.41, 29.25, 26.08, 25.90, 25.88, 25.67, 22.68, 22.65, 22.61, 14.07. HRMS (MALDI):  $[\text{M}]^+$  calcd for  $\text{C}_{104}\text{H}_{146}\text{O}_{12}$ ,  $m/z$ : 1588.0848 (100.0%), 1587.0814 (88.9%), 1589.0881 (55.7%), 1590.0915 (18.9%); found, 1588.0850, 1587.0849, 1589.0851, 1590.0866. Elemental analysis: calculated for  $\text{C}_{104}\text{H}_{146}\text{O}_{12}$  (1588.30), C 78.65%, H 9.27%; found, C 78.98%, H 9.20%.

**$\text{Tp}^6\text{Tt}_2\text{Tp}^6$ : M4** (100.0 mg, 0.120 mmol),  $\text{CH}_2\text{Cl}_2$  (15 mL),  $\text{FeCl}_3$  (43.0 mg, 0.250 mmol),  $\text{CH}_3\text{NO}_2$  (1.0 mL). Silica gel column chromatography (eluting with light petroleum/ $\text{CH}_2\text{Cl}_2$ , 1:1, v/v) and recrystallization in toluene and light petroleum yielded a yellow solid  **$\text{Tp}^6\text{Tt}_2\text{Tp}^6$**  (71.0 mg, 71%).  $^1\text{H}$  NMR ( $\text{CDCl}_3$ , TMS, 600MHz)  $\delta$  (ppm): 8.60 (s, 2H), 7.90 (s, 2H), 7.83 (s, 2H), 7.79 (s, 2H), 7.76 (s, 2H), 7.74 (s, 2H), 7.73 (s, 2H), 7.44 (s, 2H), 4.28 (t,  $J = 6.0$  Hz, 4H), 4.27 (t,  $J = 6.0$  Hz, 4H), 4.24-4.21 (m, 12H), 2.07-1.92 (m, 20H), 1.68-1.58 (m, 20H), 1.48-1.38 (m, 40H), 0.99-0.94 (m, 30H).  $^{13}\text{C}$  NMR ( $\text{CDCl}_3$ , 151 MHz)  $\delta$  (ppm): 153.90, 149.89, 149.24, 148.89, 148.71, 142.43, 140.16, 138.97, 138.34, 129.44, 124.92, 123.64, 123.15, 122.87, 122.84, 122.81, 117.93, 115.78, 107.78, 107.37, 106.76, 106.55, 104.52, 69.83, 69.78, 69.40, 69.04, 31.76, 31.74, 31.73, 31.71, 29.48, 29.45, 29.41, 29.36, 26.08, 25.93, 25.90, 25.88, 22.72, 22.68, 22.64, 14.11, 14.07. HRMS (MALDI):  $[\text{M}]^+$  calcd for  $\text{C}_{108}\text{H}_{146}\text{O}_{10}\text{S}_4$ ,  $m/z$ : 1731.9832 (100.0%), 1730.9799 (85.6%), 1732.9866 (57.9%), 1733.9899 (19.8%), 1734.9824 (10.5%); found, 1731.9836, 1732.9862, 1730.9792, 1733.9893, 1734.9891. Elemental analysis: calculated for  $\text{C}_{108}\text{H}_{146}\text{O}_{10}\text{S}_4$  (1732.59), C 74.87%, H 8.49%, S 7.40%; found, C 74.93%, H 8.48%, S 7.54%.

## 2.6. Synthesis of the symmetrical bridged dimers by Suzuki cross-coupling (Schema 10)

**$\text{Tp}^6\text{PhTp}^6$** : Under argon, **M0-1** (250.0 mg, 0.244 mmol), 1,4-phenylenebisboronic acid (16.14 mg, 0.097 mmol),  $\text{K}_2\text{CO}_3$  (403.63 mg, 2.921 mmol),  $\text{Pd}(\text{PPh}_3)_4$  (28.13 mg, 0.024 mmol), were mixed and stirred in a  $\text{H}_2\text{O}/\text{THF}$  (2 mL:8 mL) solvent mixture. The mixture was heated to  $70^\circ\text{C}$  for 24h with stirring. When cooled, the mixture was extracted with  $\text{CH}_2\text{Cl}_2$ , dried over  $\text{MgSO}_4$ , and the solvent removed under vacuum. The residue was purified by silica column chromatography with elution of  $\text{CH}_2\text{Cl}_2$ /petroleum ether 1:1 (v/v). Recrystallization in ethyl acetate-ethanol yielded a white solid (119.4 mg, 80%).  $^1\text{H}$  NMR ( $\text{CDCl}_3$ , TMS, 600MHz)  $\delta$  (ppm): 8.49 (s, 2H), 7.98 (d,  $J = 5.3$  Hz, 4H), 7.93 (s, 2H), 7.87 (s, 4H), 7.86 (s, 4H), 4.29-4.26 (m, 12H), 4.24 (d,  $J = 6.6$  Hz, 4H), 4.25 (t,  $J = 6.6$  Hz, 4H), 4.22 (t,  $J = 6.6$  Hz, 4H), 1.99-1.88 (m, 16H), 1.63-1.53 (m, 20H), 1.46-1.34 (m, 40H), 0.95 (t,  $J = 6.6$  Hz, 18H), 0.91 (t,  $J = 6.6$  Hz, 6H), 0.91 (t,  $J = 6.6$  Hz, 6H).  $^{13}\text{C}$  NMR ( $\text{CDCl}_3$ , 100 MHz)  $\delta$  (ppm): 155.02, 149.77, 149.29, 148.73, 137.51, 130.41, 129.49, 125.62, 124.86, 124.02, 123.14, 123.05, 122.97, 107.90, 107.49, 106.91, 106.46, 104.80, 69.84, 69.47, 69.31, 68.66, 31.71, 31.69, 31.65, 31.50, 29.44, 29.39, 29.37, 29.17, 25.87, 25.85, 25.81, 22.67, 22.63, 14.07, 14.04. HRMS (MALDI):  $[\text{M}]^+$  calcd for  $\text{C}_{102}\text{H}_{146}\text{O}_{10}$ ,  $m/z$ : 1532.0950 (100.0%), 1531.0916 (90.6%), 1533.0983 (54.7%), 1534.1017 (19.6%); found, 1532.0946, 1531.0918, 1533.0996, 1534.1063. Elemental analysis: calculated for  $\text{C}_{102}\text{H}_{146}\text{O}_{10}$  (1532.28), C 79.95%, H 9.60%; found, C 79.77%, H 9.89%.

All the other D- $\pi$ -D molecules were synthesized according to the above method.

**$\text{Tp}^8\text{PhTp}^8$** : **M0-2** (250.0 mg, 0.214 mmol), 1,4-phenylenebisboronic acid (14.20 mg, 0.086 mmol),  $\text{K}_2\text{CO}_3$  (355.13 mg, 2.570 mmol),  $\text{Pd}(\text{PPh}_3)_4$  (24.75 mg, 0.022 mmol):  **$\text{Tp}^8\text{PhTp}^8$**  (112.3 mg, 72%).  $^1\text{H}$  NMR ( $\text{CDCl}_3$ , TMS, 600MHz)  $\delta$  (ppm): 8.49 (s, 2H), 7.98 (d,  $J = 4.6$  Hz, 4H), 7.93 (s, 2H), 7.86 (s, 8H), 4.28-4.26 (m, 12H), 4.24 (t,  $J = 6.6$  Hz, 4H), 4.21 (t,  $J = 6.6$  Hz, 4H), 1.99-1.88 (m, 20H), 1.62-1.52 (m, 20H), 1.46-1.26 (m, 80H), 0.92-0.83 (m, 30H).  $^{13}\text{C}$  NMR ( $\text{CDCl}_3$ , 100 MHz)  $\delta$  (ppm): 155.01, 149.78, 149.31, 148.75, 148.73, 137.50, 130.38, 129.49, 125.62, 124.85, 124.06, 123.17, 123.04, 122.98, 107.94, 107.54, 106.94, 106.48, 104.77, 69.87, 69.49, 69.32, 68.64, 31.86, 31.83, 31.81, 29.50, 29.45, 29.35, 29.31, 29.24, 26.22, 26.19, 26.15, 22.70, 22.66, 14.12, 14.09. HRMS (MALDI):  $[\text{M}]^+$  calcd for  $\text{C}_{122}\text{H}_{186}\text{O}_{10}$ ,  $m/z$ : 1812.4080 (100.0%), 1811.4046 (75.8%), 1813.4113 (65.4%), 1814.4147 (28.4%); found, 1812.4072, 1811.4045, 1813.4115, 1814.40. Elemental analysis: calculated for  $\text{C}_{122}\text{H}_{186}\text{O}_{10}$  (1812.82), C 80.83%, H 10.34%; found, C 80.42%, H 10.54%.

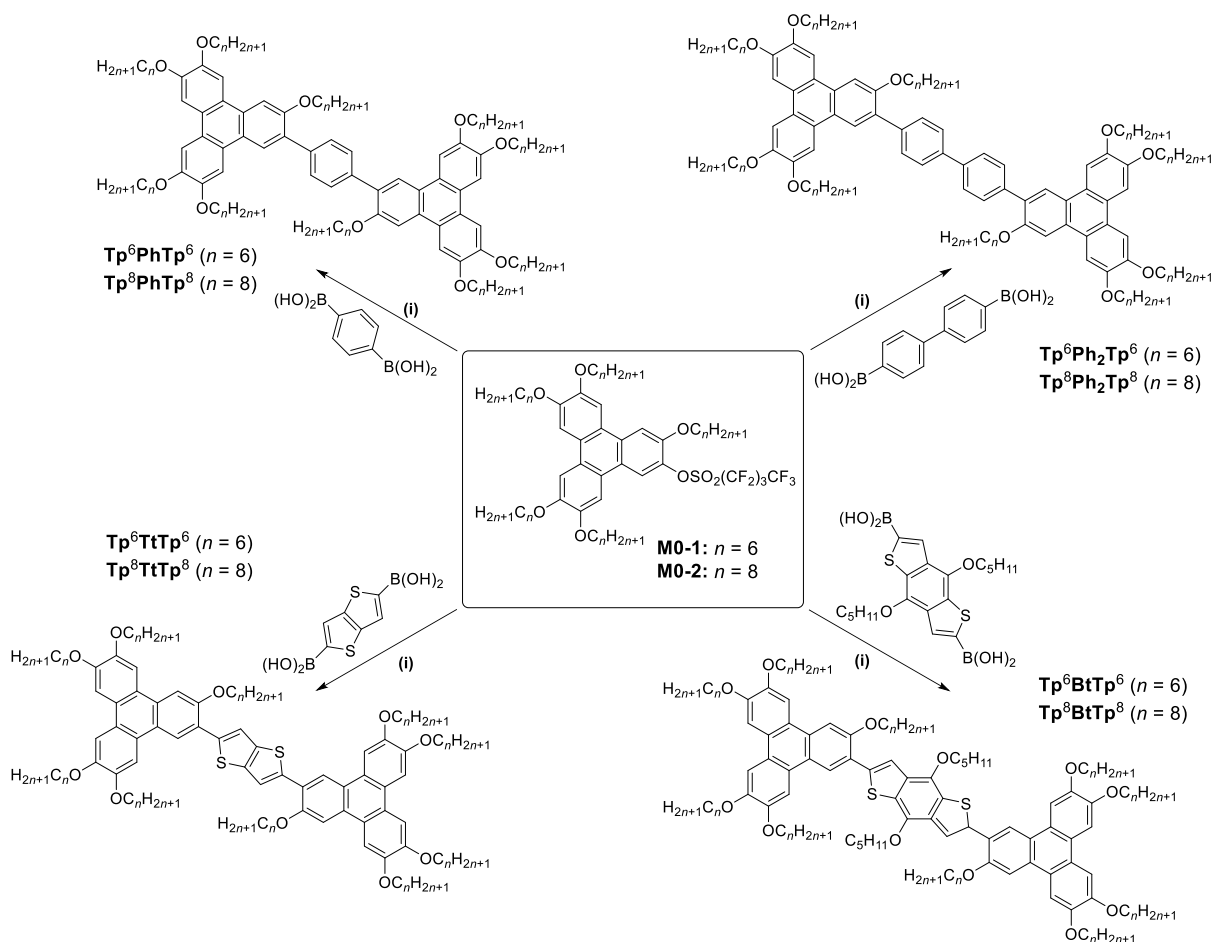

**Scheme S10:** Synthetic procedure for symmetrical dimers by Suzuki cross-coupling. (i) Pd(PPh<sub>3</sub>)<sub>4</sub>, K<sub>2</sub>CO<sub>3</sub>, THF/H<sub>2</sub>O.

**Tp<sup>6</sup>Ph<sub>2</sub>Tp<sup>6</sup>:** **MO-1** (250.0 mg, 0.244 mmol), 4,4'-biphenyldiboronic acid (23.54 mg, 0.097 mmol), K<sub>2</sub>CO<sub>3</sub> (403.63 mg, 2.921 mmol), Pd(PPh<sub>3</sub>)<sub>4</sub> (28.13 mg, 0.024 mmol): **Tp<sup>6</sup>Ph<sub>2</sub>Tp<sup>6</sup>** (123.5 mg, 78%). <sup>1</sup>H NMR (CDCl<sub>3</sub>, TMS, 600MHz) δ (ppm): 8.45 (s, 2H), 7.97 (d, *J* = 6.4 Hz, 4H), 7.92 (s, 2H), 7.86–7.82 (m, 12H), 4.28–4.21 (m, 20H), 1.99–1.86 (m, 20H), 1.63–1.51 (m, 20H), 1.46–1.35 (m, 40H), 0.96–0.91 (m, 30H). <sup>13</sup>C NMR (C<sub>2</sub>D<sub>2</sub>Cl<sub>4</sub>, 151 MHz) δ (ppm): 154.97, 150.02, 149.46, 148.95, 139.11, 137.60, 130.40, 129.97, 129.35, 126.51, 125.33, 124.76, 123.91, 122.98, 122.77, 108.57, 108.06, 107.46, 107.18, 104.92, 70.12, 70.05, 69.67, 68.75, 31.59, 31.56, 31.44, 29.42, 29.36, 29.12, 25.83, 25.77, 25.71, 22.62, 22.59, 14.10, 14.07. HRMS (MALDI): [M]<sup>+</sup> calcd for C<sub>108</sub>H<sub>150</sub>O<sub>10</sub>, *m/z*: 1608.1263 (100.0%), 1607.1229 (85.6%), 1609.1296 (57.9%), 1610.1330 (12.1%); found, 1608.1258, 1607.1228, 1609.1306, 1610.1354. Elemental analysis: calculated for C<sub>108</sub>H<sub>150</sub>O<sub>10</sub> (1608.38), C 80.65%, H 9.40%; found, C 80.39%, H 9.03%.

**Tp<sup>8</sup>Ph<sub>2</sub>Tp<sup>8</sup>:** **MO-2** (250.0 mg, 0.214 mmol), 4,4'-biphenyldiboronic acid (20.72 mg, 0.086 mmol), K<sub>2</sub>CO<sub>3</sub> (355.13 mg, 2.570 mmol), Pd(PPh<sub>3</sub>)<sub>4</sub> (24.75 mg, 0.022 mmol): **Tp<sup>8</sup>Ph<sub>2</sub>Tp<sup>8</sup>** (116.2 mg, 72%). <sup>1</sup>H NMR (CDCl<sub>3</sub>, TMS, 600MHz) δ (ppm): 8.45 (s, 2H), 7.97 (d, *J* = 6.1 Hz, 4H), 7.92 (s, 2H), 7.86–7.83 (m, 12H), 4.28–4.21 (m, 20H), 1.99–1.86 (m, 20H), 1.62–1.51 (m, 20H), 1.46–1.28 (m, 80H), 0.92–0.87 (m, 30H). <sup>13</sup>C NMR (C<sub>2</sub>D<sub>2</sub>Cl<sub>4</sub>, 151 MHz) δ (ppm): 154.96, 150.01, 149.46, 148.93, 139.09, 137.59, 130.38, 129.99, 129.35, 126.49, 125.34, 124.77, 123.89, 122.99, 122.76, 108.58, 108.10, 107.48, 107.19, 104.96, 70.15, 70.08, 69.70, 69.64, 68.78, 31.77, 31.74, 29.48, 29.41, 29.38, 29.27, 29.24, 29.19, 26.20, 26.13, 26.11, 26.05, 22.65, 14.16. HRMS (MALDI): [M]<sup>+</sup> calcd for C<sub>128</sub>H<sub>190</sub>O<sub>10</sub>, *m/z*: 1888.4393 (100.0%), 1887.4359 (72.2%), 1889.4426 (68.7%), 1890.4460 (31.1%), 1891.4493 (10.5%); found, 1888.4391, 1889.4429, 1887.4358, 1890.4465, 1891.4502. Elemental analysis: calculated for C<sub>128</sub>H<sub>190</sub>O<sub>10</sub> (1888.92), C 81.39%, H 10.14%; found, C 80.93%, H 10.39%.

**Tp<sup>6</sup>TtTp<sup>6</sup>:** **MO-1** (250.0 mg, 0.244 mmol), thieno[3,2-*b*]thiophene-2,5-diboronic acid (22.18 mg,

0.097 mmol), K<sub>2</sub>CO<sub>3</sub> (403.63 mg, 2.921 mmol), Pd(PPh<sub>3</sub>)<sub>4</sub> (28.13 mg, 0.024 mmol): **Tp<sup>6</sup>TtTp<sup>6</sup>** (106.0 mg, 68%). <sup>1</sup>H NMR (CDCl<sub>3</sub>, TMS, 600MHz) δ (ppm): 8.72 (s, 2H), 7.99 (s, 2H), 7.95 (s, 2H), 7.90 (s, 2H), 7.87 (s, 2H), 7.83 (s, 4H), 4.36 (t, *J* = 6.4 Hz, 4H), 4.30 (t, *J* = 6.5 Hz, 4H), 4.27-4.23(m, 12H), 2.10-2.05 (m, 4H), 2.01-1.93 (m, 16H), 1.71-1.57 (m, 20H), 1.50-1.37 (m, 40H), 0.98-0.93 (m, 30H). <sup>13</sup>C NMR (CDCl<sub>3</sub>, 100 MHz) δ (ppm): 157.49, 149.54, 149.09, 148.72, 148.59, 130.31, 124.59, 124.34, 123.94, 123.24, 122.93, 122.84, 114.43, 107.36, 107.28, 106.85, 106.66, 106.37, 69.76, 69.49, 69.46, 69.17, 68.21, 31.67, 29.43, 29.40, 29.35, 29.31, 25.82, 22.65, 14.06. HRMS (MALDI): [M]<sup>+</sup> calcd for C<sub>102</sub>H<sub>144</sub>O<sub>10</sub>S<sub>2</sub>, *m/z*: 1594.0234 (100.0%), 1593.0201 (90.6%), 1595.0268 (54.6%), 1596.0302 (19.6%); found, 1594.0234, 1593.0198, 1595.0276, 1596.0304. Elemental analysis: calculated for C<sub>102</sub>H<sub>144</sub>O<sub>10</sub>S<sub>2</sub> (1594.38), C 76.84%, H 9.10%, S 4.02%; found, C 77.09%, H 9.10%, S 4.06%.

**Tp<sup>8</sup>TtTp<sup>8</sup>: MO-2** (250.0 mg, 0.214 mmol), thieno[3,2-*b*]thiophene-2,5-diboronic acid (19.52 mg, 0.086 mmol), K<sub>2</sub>CO<sub>3</sub> (355.13 mg, 2.570 mmol), Pd(PPh<sub>3</sub>)<sub>4</sub> (24.75 mg, 0.022 mmol): **Tp<sup>8</sup>TtTp<sup>8</sup>** (107.8 mg, 67%). <sup>1</sup>H NMR (CDCl<sub>3</sub>, TMS, 600MHz) δ (ppm): 8.72 (s, 2H), 8.00 (s, 2H), 7.94 (s, 2H), 7.91 (s, 2H), 7.87 (s, 2H), 7.84 (s, 4H), 4.36 (t, *J* = 6.5 Hz, 4H), 4.29 (t, *J* = 6.5 Hz, 4H), 4.27-4.23 (m, 12H), 2.10-2.05 (m, 4H), 2.00-1.93(m, 16H), 1.69-1.57 (m, 20H), 1.50-1.32 (m, 80H), 0.92-0.88 (m, 30H). <sup>13</sup>C NMR (CDCl<sub>3</sub>, 100 MHz) δ (ppm): 154.06, 149.88, 149.30, 148.93, 148.76, 141.79, 139.89, 129.37, 124.94, 123.75, 123.36, 123.22, 123.12, 122.95, 118.30, 107.91, 107.46, 106.91, 106.74, 104.73, 69.89, 69.81, 69.47, 69.10, 31.87, 31.85, 29.54, 29.46, 29.37, 29.30, 26.40, 26.24, 26.23, 22.70, 14.14, 14.12. HRMS (MALDI): [M]<sup>+</sup> calcd for C<sub>122</sub>H<sub>184</sub>O<sub>10</sub>S<sub>2</sub>, *m/z*: 1874.3364 (100.0%), 1873.3331 (75.8%), 1875.3398 (65.4%), 1876.3432 (28.4%); found, 1874.3340, 1875.3399, 1873.3290, 1876.3516. Elemental analysis: calculated for C<sub>122</sub>H<sub>184</sub>O<sub>10</sub>S<sub>2</sub> (1874.92), C 78.15%, H 9.89%, S 3.42%; found, C 78.34%, H 9.68%, S 3.34%.

**Tp<sup>6</sup>BtTp<sup>6</sup>: MO-1** (250.0 mg, 0.244 mmol), 4,8-bis(pentyloxy)benzo[1,2-*b*:4,5-*b'*]thiophene diboronic acid (43.83 mg, 0.097 mmol), K<sub>2</sub>CO<sub>3</sub> (403.63 mg, 2.921 mmol), Pd(PPh<sub>3</sub>)<sub>4</sub> (28.13 mg, 0.024 mmol): **Tp<sup>6</sup>BtTp<sup>6</sup>** (112.7 mg, 64%). <sup>1</sup>H NMR (CDCl<sub>3</sub>, TMS, 600MHz) δ (ppm): 8.78 (s, 2H), 8.15 (s, 2H), 8.04 (s, 2H), 7.94 (s, 2H), 7.91 (s, 2H), 7.85 (s, 4H), 4.43 (t, *J* = 6.5 Hz, 4H), 4.38 (t, *J* = 6.4 Hz, 4H), 4.31-4.24 (m, 16H), 2.12-2.07 (m, 4H), 2.03-1.93 (m, 20H), 1.72-1.57 (m, 24H), 1.52-1.37 (m, 44H), 0.99 (t, *J* = 7.4 Hz, 6H), 0.96-0.92 (m, 30H). <sup>13</sup>C NMR (C<sub>2</sub>D<sub>2</sub>Cl<sub>4</sub>, 151 MHz) δ (ppm): 154.57, 150.31, 149.52, 149.20, 148.95, 143.77, 139.54, 132.36, 129.81, 129.64, 125.06, 124.22, 123.60, 123.19, 122.75, 122.64, 119.53, 108.74, 108.16, 107.35, 104.68, 70.23, 70.07, 69.72, 69.62, 69.05, 31.66, 31.60, 31.57, 30.26, 29.41, 29.39, 29.33, 28.16, 26.03, 25.76, 22.62, 22.58, 22.53, 14.13, 14.10. HRMS (MALDI): [M]<sup>+</sup> calcd for C<sub>116</sub>H<sub>166</sub>O<sub>12</sub>S<sub>2</sub>, *m/z*: 1816.1854 (100.0%), 1815.1821 (79.7%), 1817.1888 (62.2%), 1818.1921 (25.6%), 1819.1846 (5.6%); found, 1816.1855, 1815.1818, 1817.1893, 1818.1925, 1819.1943. Elemental analysis: calculated for C<sub>116</sub>H<sub>166</sub>O<sub>12</sub>S<sub>2</sub> (1816.71), C 76.69%, H 9.21%, S 3.53%; found, C 76.90%, H 9.13%, S 3.60%.

**Tp<sup>8</sup>BtTp<sup>8</sup>: MO-2** (250.0 mg, 0.214 mmol), 4,8-bis(pentyloxy)benzo[1,2-*b*:4,5-*b'*]thiophene diboronic acid (38.56 mg, 0.086 mmol), K<sub>2</sub>CO<sub>3</sub> (355.13 mg, 2.570 mmol), Pd(PPh<sub>3</sub>)<sub>4</sub> (24.75 mg, 0.022 mmol): **Tp<sup>8</sup>BtTp<sup>8</sup>** (108.5 mg, 60%). <sup>1</sup>H NMR (CDCl<sub>3</sub>, TMS, 600MHz) δ (ppm): 8.78 (s, 2H), 8.15 (s, 2H), 8.04 (s, 2H), 7.94 (s, 2H), 7.91 (s, 2H), 7.85 (s, 4H), 4.43 (t, *J* = 6.6 Hz, 4H), 4.38 (t, *J* = 6.4 Hz, 4H), 4.31-4.24 (m, 16H), 2.12-2.07 (m, 4H), 2.03-1.93 (m, 20H), 1.71-1.57 (m, 24H), 1.52-1.32 (m, 84H), 0.99 (t, *J* = 7.4 Hz, 6H), 0.92-0.88 (m, 30H). <sup>13</sup>C NMR (C<sub>2</sub>D<sub>2</sub>Cl<sub>4</sub>, 151 MHz) δ (ppm): 154.57, 150.31, 149.53, 149.19, 148.95, 143.78, 139.54, 132.37, 129.79, 129.66, 129.63, 125.06, 124.22, 123.61, 123.19, 122.76, 122.65, 119.55, 108.74, 108.18, 107.35, 104.69, 70.24, 70.10, 69.72, 69.63, 69.06, 31.82, 31.77, 30.27, 29.48, 29.45, 29.43, 29.40, 29.28, 29.27, 29.24, 28.18, 26.35, 26.13, 26.12, 22.65, 22.63, 22.53, 14.16, 14.14. HRMS (MALDI): [M]<sup>+</sup> calcd for C<sub>136</sub>H<sub>206</sub>O<sub>12</sub>S<sub>2</sub>, *m/z*: 2096.4984 (100.0%), 2097.5018 (73.0%), 2095.4951 (68.0%); found, 2096.4983, 2097.5023, 2095.4943. Elemental analysis: calculated for C<sub>136</sub>H<sub>206</sub>O<sub>12</sub>S<sub>2</sub> (2097.25), C 77.89%, H 9.90%, S 3.06%; found, C 77.63%, H 9.68%, S 3.02%.

## 2.7. Synthesis of the unsymmetrical bridged dimers **Tp<sup>6</sup>Ph<sub>2</sub>Tp<sup>12</sup>** and **Tp<sup>6</sup>Th<sub>2</sub>Tp<sup>12</sup>** by double Suzuki cross-coupling (Schemes S11-S12)

**Tp<sup>6</sup>Ph<sub>2</sub>Tp<sup>12</sup>/Tp<sup>12</sup>Ph<sub>2</sub>Tp<sup>12</sup>**: Under argon, 4,4'-biphenyldiboronic acid (36.4 mg, 0.151 mmol), **MO-4** (203.5 mg, 0.166 mmol), K<sub>2</sub>CO<sub>3</sub> (416.1 mg, 3.011 mmol), Pd(PPh<sub>3</sub>)<sub>4</sub> (17.4 mg, 0.015 mmol), were mixed and stirred in a H<sub>2</sub>O/THF (2 mL:8 mL) solvent mixture. The mixture was heated to

70°C for 6h with stirring. Subsequently, the reaction was cooled to room temperature, and **M0-3** (133.8 mg, 0.166 mmol) and additional Pd(PPh<sub>3</sub>)<sub>4</sub> (34.8 mg, 0.030 mmol) were added. The temperature was reheated to 70°C under argon, and the reaction was stirred for 12h. When cooled, the mixture was extracted with CH<sub>2</sub>Cl<sub>2</sub>, dried over MgSO<sub>4</sub>, and the solvent removed under vacuum. The residue was purified by silica column chromatography with elution of CH<sub>2</sub>Cl<sub>2</sub>/petroleum ether 1:1 (v/v). Recrystallizing from EtOAc-EtOH yield a white solid **Tp<sup>6</sup>Ph<sub>2</sub>Tp<sup>12</sup>** (73.3 mg, 24%) and some amount of the symmetrical compounds **Tp<sup>12</sup>Ph<sub>2</sub>Tp<sup>12</sup>** (114.4 mg, 31%) and **Tp<sup>6</sup>Ph<sub>2</sub>Tp<sup>6</sup>** (65.4 mg, 27%). **Tp<sup>6</sup>Ph<sub>2</sub>Tp<sup>12</sup>**: <sup>1</sup>H NMR (CDCl<sub>3</sub>, TMS, 600MHz) δ (ppm): 8.45 (s, 2H), 7.97 (s, 2H), 7.96 (s, 2H), 7.91 (s, 2H), 7.86-7.83 (m, 12H), 4.26 (s, 20H), 1.98-1.86 (m, 20H), 1.63-1.53 (m, 20H), 1.44-1.28 (m, 100H), 0.96-0.83 (m, 30H). <sup>13</sup>C NMR (CDCl<sub>3</sub>, 151 MHz) δ (ppm): 155.00, 149.78, 149.30, 148.78, 139.58, 137.86, 130.34, 130.13, 129.55, 126.66, 125.45, 124.85, 124.01, 123.13, 122.99, 107.89, 107.49, 106.92, 106.58, 104.90, 69.83, 69.47, 69.36, 68.72, 31.93, 31.91, 31.71, 31.69, 31.66, 31.53, 29.74, 29.71, 29.69, 29.66, 29.64, 29.56, 29.51, 29.44, 29.39, 29.36, 29.27, 29.22, 26.26, 26.23, 26.21, 26.15, 25.90, 25.87, 25.85, 25.81, 22.69, 22.67, 22.63, 14.11, 14.10, 14.06, 14.04. HRMS (MALDI): [M]<sup>+</sup> calcd for C<sub>138</sub>H<sub>210</sub>O<sub>10</sub>, m/z: 2028.5958 (100.0%), 2027.5924 (67.0%), 2029.5991 (45.4%), 2030.6025 (17.0%); found, 2028.5902, 2029.5945, 2027.5854, 2030.5997. Elemental analysis: calculated for C<sub>138</sub>H<sub>210</sub>O<sub>10</sub> (2029.19), C 81.68%, H 10.43%; found, C 81.47%, H 10.26%. **Tp<sup>12</sup>Ph<sub>2</sub>Tp<sup>12</sup>**: <sup>1</sup>H NMR (CDCl<sub>3</sub>, TMS, 600MHz) δ (ppm): 8.45 (s, 2H), 7.97 (s, 2H), 7.96 (s, 2H), 7.92 (s, 2H), 7.87-7.83 (m, 12H), 4.27-4.25 (m, 20H), 1.98-1.87 (m, 20H), 1.62-1.51 (m, 20H), 1.46-1.28 (m, 160H), 0.90-0.84 (m, 30H). <sup>13</sup>C NMR (CDCl<sub>3</sub>, 151 MHz) δ (ppm): 154.99, 149.81, 149.31, 148.79, 139.57, 137.86, 130.34, 130.16, 129.56, 126.66, 125.45, 124.86, 124.03, 123.12, 123.00, 107.92, 107.52, 106.95, 106.60, 104.91, 69.86, 69.49, 69.38, 68.73, 31.93, 31.91, 29.74, 29.72, 29.69, 29.56, 29.51, 29.45, 29.39, 29.37, 29.27, 26.26, 26.23, 26.21, 26.17, 22.70, 22.68, 14.12. HRMS (MALDI): [M]<sup>+</sup> calcd for C<sub>168</sub>H<sub>270</sub>O<sub>10</sub>, m/z: 2449.0653 (100.0%), 2450.0686 (66.8%), 2448.0619 (55.0%), 2451.0720 (54.0%), 2452.0753 (17.1%); found, 2449.0656, 2450.0616, 2451.0612, 2448.0689, 2452.0641. Elemental analysis: calculated for C<sub>168</sub>H<sub>270</sub>O<sub>10</sub> (2449.99), C 82.36%, H 11.11%; found, C 82.42%, H 10.87%.

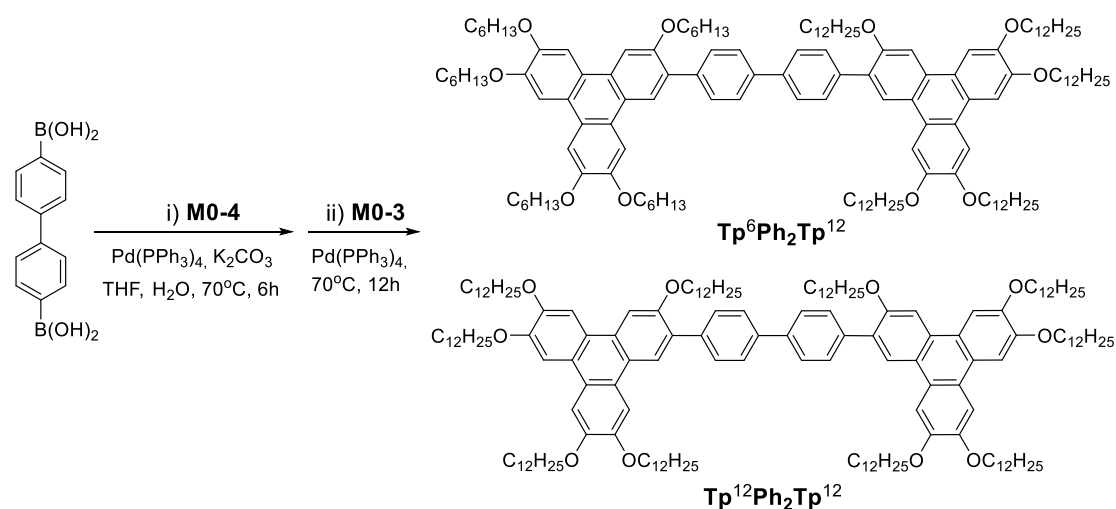

**Scheme S11:** Synthetic procedure for unsymmetrical dimer **Tp<sup>6</sup>Ph<sub>2</sub>Tp<sup>12</sup>**.

**Tp<sup>6</sup>Th<sub>2</sub>Tp<sup>12</sup>/Tp<sup>12</sup>Th<sub>2</sub>Tp<sup>12</sup>**: Under argon, 2,2'-Bithiophene-5,5'-diboronic acid bis(pinacol) ester (108.2 mg, 0.259 mmol), **M0-3** (230.0 mg, 0.285 mmol), **M0-4** (349.8 mg, 0.285 mmol), K<sub>2</sub>CO<sub>3</sub> (715.2 mg, 5.175 mmol), Pd(PPh<sub>3</sub>)<sub>4</sub> (89.7 mg, 0.078 mmol), were mixed and stirred in a H<sub>2</sub>O/THF (2 mL:8 mL) solvent mixture. The mixture was heated to 70°C for 24h with stirring. When cooled, the mixture was extracted with CH<sub>2</sub>Cl<sub>2</sub>, dried over MgSO<sub>4</sub>, and the solvent removed under vacuum. The residue was purified by silica column chromatography with elution of CH<sub>2</sub>Cl<sub>2</sub>/petroleum ether 1:1 (v/v). Recrystallized from EtOAc-EtOH to get a yellow solid **Tp<sup>6</sup>Th<sub>2</sub>Tp<sup>12</sup>** (132.1 mg, 25%) and some amount of symmetrical compounds **Tp<sup>12</sup>Th<sub>2</sub>Tp<sup>12</sup>** (101.9 mg, 16%) and **Tp<sup>6</sup>Th<sub>2</sub>Tp<sup>6</sup>** (96.4 mg, 23%). **Tp<sup>6</sup>Th<sub>2</sub>Tp<sup>12</sup>**: <sup>1</sup>H NMR (CDCl<sub>3</sub>, TMS, 600MHz) δ (ppm): 8.69 (s, 2H), 7.98 (s, 2H), 7.89 (s, 2H), 7.84 (s, 2H), 7.82 (s, 4H), 7.67 (s, 2H), 7.33 (s, 2H), 4.34 (s, 4H), 4.27-4.23 (m, 16H), 2.08-2.05 (m, 4H), 1.95-1.93 (m, 16H), 1.71-1.67 (m, 4H), 1.62-

1.57 (m, 16H), 1.48-1.21 (m, 100H), 0.97-0.93 (m, 15H), 0.89-0.81 (m, 15H).  $^{13}\text{C}$  NMR ( $\text{CDCl}_3$ , 151 MHz)  $\delta$  (ppm): 153.91, 149.89, 149.26, 148.94, 148.79, 138.76, 137.72, 129.32, 126.42, 124.92, 123.77, 123.38, 123.23, 123.02, 122.87, 122.72, 122.64, 107.89, 107.46, 106.93, 106.83, 106.78, 104.55, 69.88, 69.80, 69.47, 69.04, 31.93, 31.90, 31.72, 31.71, 31.70, 31.68, 29.74, 29.72, 29.69, 29.57, 29.51, 29.47, 29.44, 29.39, 29.37, 26.50, 26.23, 26.15, 25.89, 25.86, 22.69, 22.67, 14.12, 14.06. HRMS (MALDI):  $[\text{M}]^+$  calcd for  $\text{C}_{134}\text{H}_{206}\text{O}_{10}\text{S}_2$ ,  $m/z$ : 2040.5086 (100.0%), 2041.5120 (71.9%), 2039.5052 (69.0%), 2042.5153 (35.2%), 2043.5187 (14.4%); found, 2040.5073, 2041.5100, 2039.5033, 2042.5120, 2043.5151. Elemental analysis: calculated for  $\text{C}_{134}\text{H}_{206}\text{O}_{10}\text{S}_2$  (2041.23), C 78.85%, H 10.17%, S 3.14%; found, C 79.15%, H 9.97%, S 3.26%. **Tp<sup>12</sup>Th<sub>2</sub>Tp<sup>12</sup>**:  $^1\text{H}$  NMR ( $\text{CDCl}_3$ , TMS, 600MHz)  $\delta$  (ppm): 8.69 (s, 2H), 7.98 (s, 2H), 7.90 (s, 2H), 7.85 (s, 2H), 7.83 (s, 4H), 7.67 (d,  $J = 3.5$  Hz, 2H), 7.33 (d,  $J = 3.5$  Hz, 2H), 4.35 (t,  $J = 6.1$  Hz, 4H), 4.28-4.23 (m, 16H), 2.09-2.04 (m, 4H), 1.99-1.95 (m, 16H), 1.71-1.66 (m, 4H), 1.62-1.58 (m, 16H), 1.49-1.21 (m, 160H), 0.89-0.81 (m, 30H).  $^{13}\text{C}$  NMR ( $\text{CDCl}_3$ , 151 MHz)  $\delta$  (ppm): 153.91, 149.89, 149.27, 148.95, 148.80, 138.75, 137.74, 129.33, 126.41, 124.93, 123.78, 123.35, 123.24, 123.03, 122.88, 122.74, 122.63, 107.93, 107.49, 106.96, 106.82, 104.56, 69.90, 69.82, 69.49, 69.04, 31.93, 31.91, 29.74, 29.72, 29.69, 29.57, 29.51, 29.47, 29.44, 29.39, 26.50, 26.22, 22.69, 22.67, 14.12. HRMS (MALDI):  $[\text{M}]^+$  calcd for  $\text{C}_{164}\text{H}_{266}\text{O}_{10}\text{S}_2$ ,  $m/z$ : 2460.9781 (100.0%), 2461.9815 (88.1%), 2459.9747 (56.4%), 2462.9848 (60.5%), 2463.9882 (22.4%); found, 2460.9770, 2461.9787, 2459.9751, 2462.9803, 2463.9831. Elemental analysis: calculated for  $\text{C}_{164}\text{H}_{266}\text{O}_{10}\text{S}_2$  (2462.04), C 80.01%, H 10.89%, S 2.60%; found, C 79.82%, H 10.61%, S 2.59%.

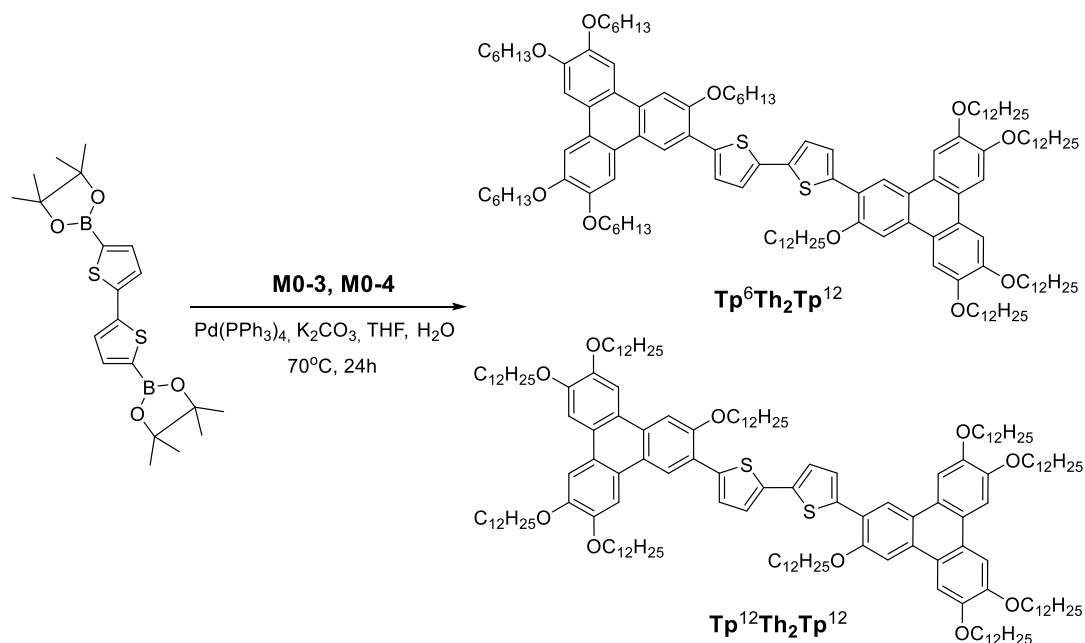

## 2.8. Synthesis of the non-bridged dimers $\text{Tp}^6\text{Tp}^6$ by Suzuki cross-coupling (Schemes S13)

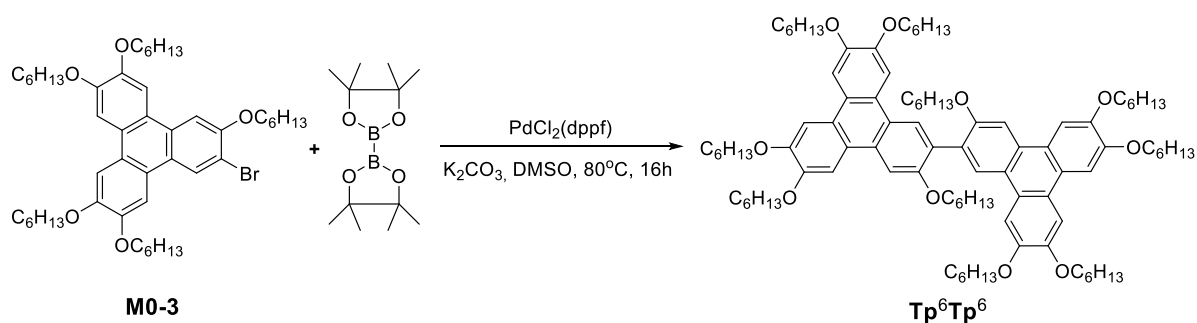

**Tp<sup>6</sup>Tp<sup>6</sup>**: A dry flask with an argon atmosphere was charged with **M0-3** (400.0 mg, 0.495 mmol), bis(pinacolato)diboron (68.9 mg, 0.248 mmol), PdCl<sub>2</sub>(dppf) (14.5 mg, 4.0 mol %), K<sub>2</sub>CO<sub>3</sub> (205.3 mg, 1.49 mmol), 4.0 mol % of dppf (11.0 mg) were added. After addition of 10 mL of DMSO, the reaction was stirred at 80°C for 16h. The reaction mixture was cooled to room temperature and extracted with CH<sub>2</sub>Cl<sub>2</sub>, dried over MgSO<sub>4</sub>, evaporated and the residue purified by column chromatography (eluent light petroleum/dichloromethane, 1/1.5, v/v). Recrystallized from EtOAc-EtOH to get a white solid **Tp<sup>6</sup>Tp<sup>6</sup>** (256.2 mg, 71%).<sup>[5]</sup> <sup>1</sup>H NMR (CDCl<sub>3</sub>, TMS, 600MHz) δ (ppm): 8.47 (s, 2H), 8.00 (s, 2H), 7.93 (s, 2H), 7.92 (s, 2H), 7.88 (s, 4H), 4.28 (t, *J* = 6.3 Hz, 8H), 4.24 (m, 4H), 4.18 (m, 4H), 4.14 (m, 4H), 2.00-1.91 (m, 12H), 1.89-1.84 (m, 4H), 1.72-1.68 (m, 4H), 1.63-1.58 (m, 12H), 1.52-1.47 (m, 4H), 1.45-1.38 (m, 24H), 1.34-1.28 (m, 12H), 1.20-1.11 (m, 8H), 0.96-0.92 (m, 18H), 0.85 (t, *J* = 7.0 Hz, 6H), 0.72 (t, *J* = 7.1 Hz, 6H). <sup>13</sup>C NMR (CDCl<sub>3</sub>, 151 MHz) δ (ppm): 156.02, 149.70, 149.37, 148.71, 148.54, 129.64, 128.54, 126.23, 124.82, 124.24, 123.37, 122.90, 122.60, 107.96, 107.69, 106.92, 106.30, 104.41, 69.96, 69.87, 69.48, 69.16, 68.77, 31.70, 31.68, 31.59, 31.53, 29.44, 29.40, 29.35, 29.30, 25.87, 25.82, 25.76, 22.66, 22.65, 22.55, 22.48, 14.06, 13.96, 13.88. HRMS (MALDI): [M]<sup>+</sup> calcd for C<sub>96</sub>H<sub>142</sub>O<sub>10</sub>, m/z: 1456.0637 (100.0%), 1455.0603 (96.3%), 1457.0670 (51.4%), 1458.0704 (17.0%); found, 1456.0621, 1455.0572, 1457.0663, 1458.0703. Elemental analysis: calculated for C<sub>96</sub>H<sub>142</sub>O<sub>10</sub> (1455.0603), C 79.18%, H 9.83%; found, C 78.86%, H 9.85%.

### 3. <sup>1</sup>H, <sup>13</sup>C and <sup>19</sup>F NMR

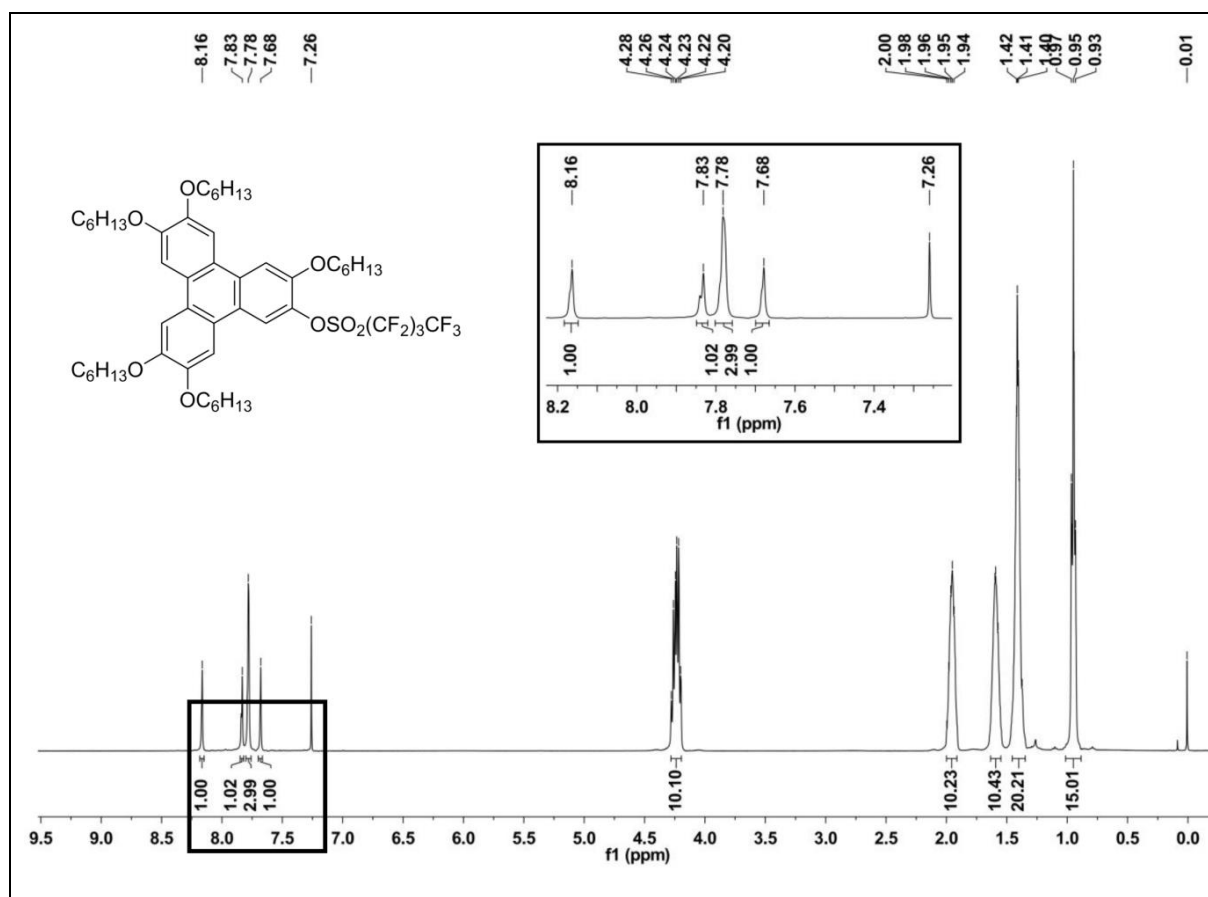

<sup>[5]</sup> C. F. Nising, U. K. Schmid, M. Nieger, S. Bräse. A New Protocol for the One-Pot Synthesis of Symmetrical Biaryls. *J. Org. Chem.*, 2004, 69, 6830-6833.

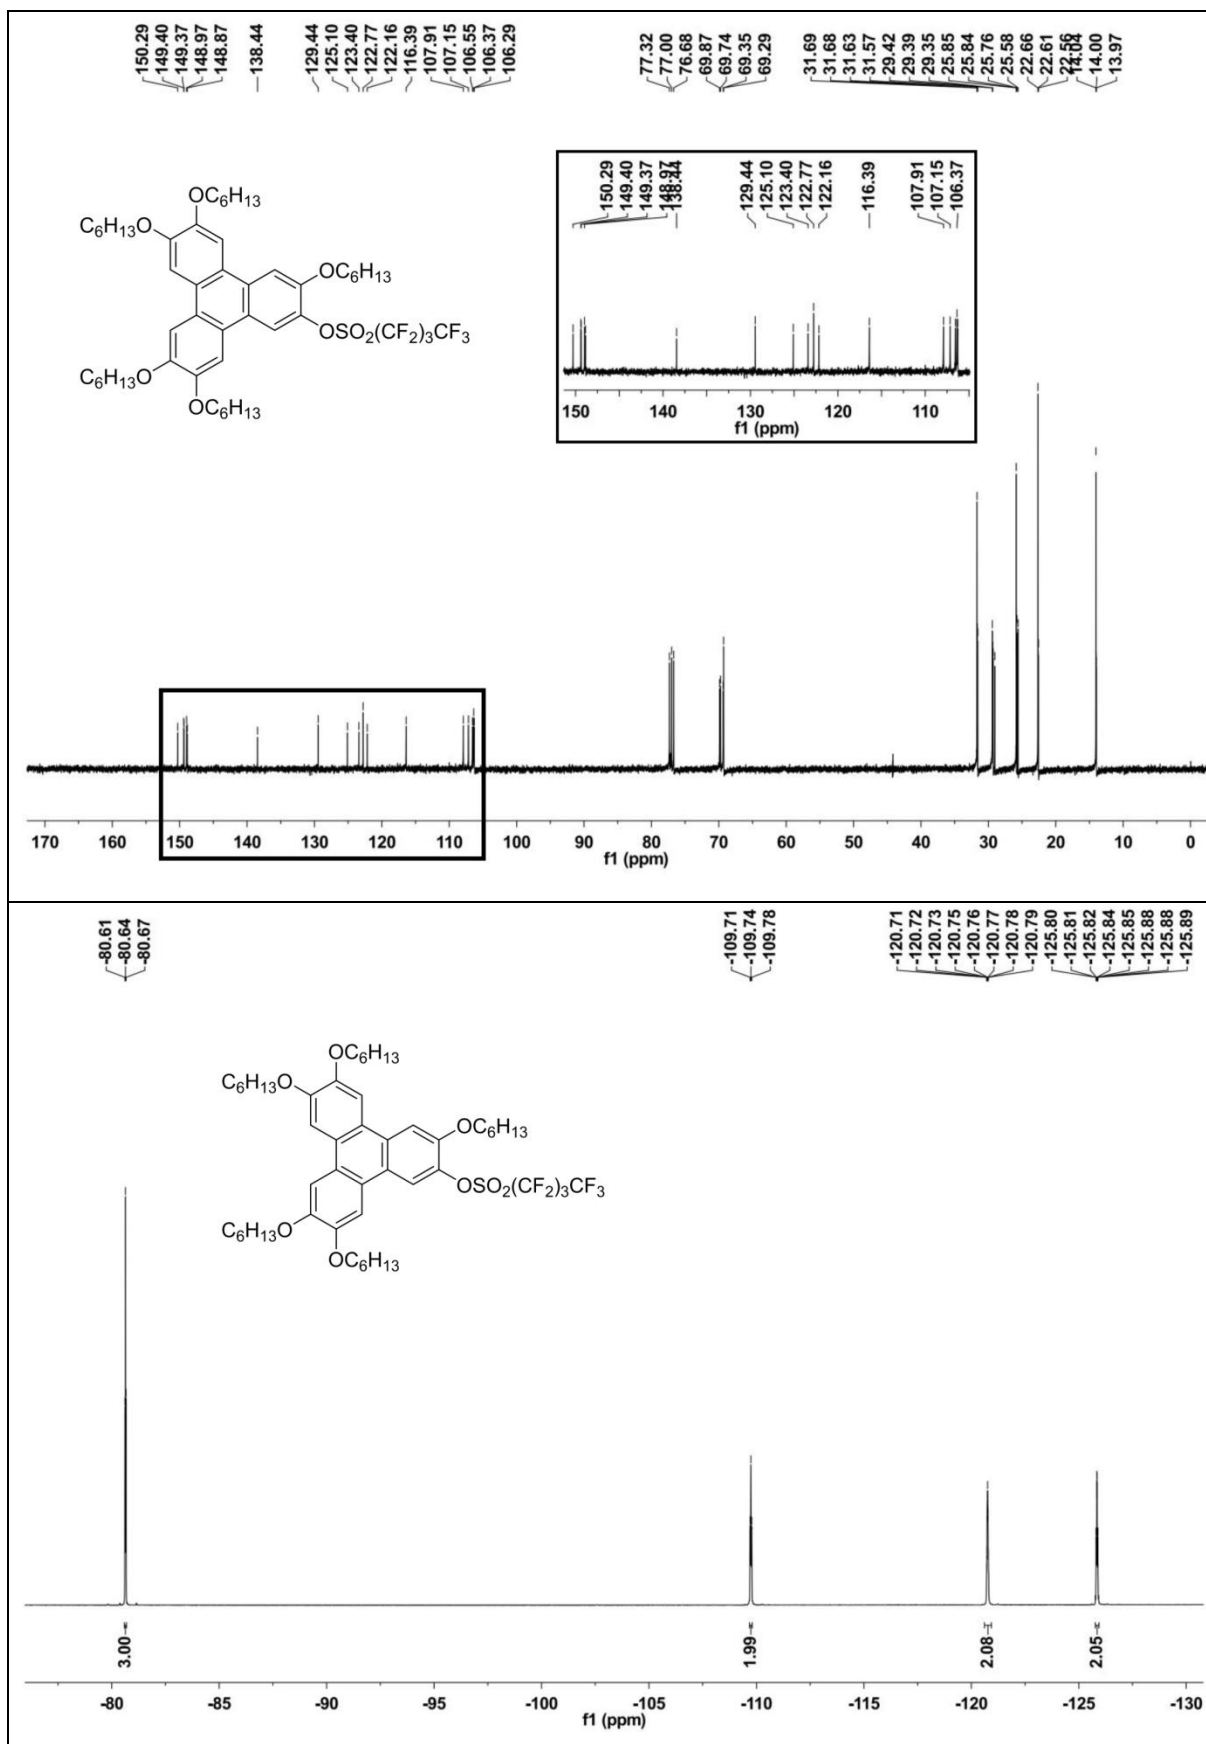

**Figure S1.** <sup>1</sup>H NMR (CDCl<sub>3</sub>, 400MHz), <sup>13</sup>C NMR (CDCl<sub>3</sub>, 100 MHz) and <sup>19</sup>F NMR (CDCl<sub>3</sub>, 376 MHz) spectra of **M0-1**.



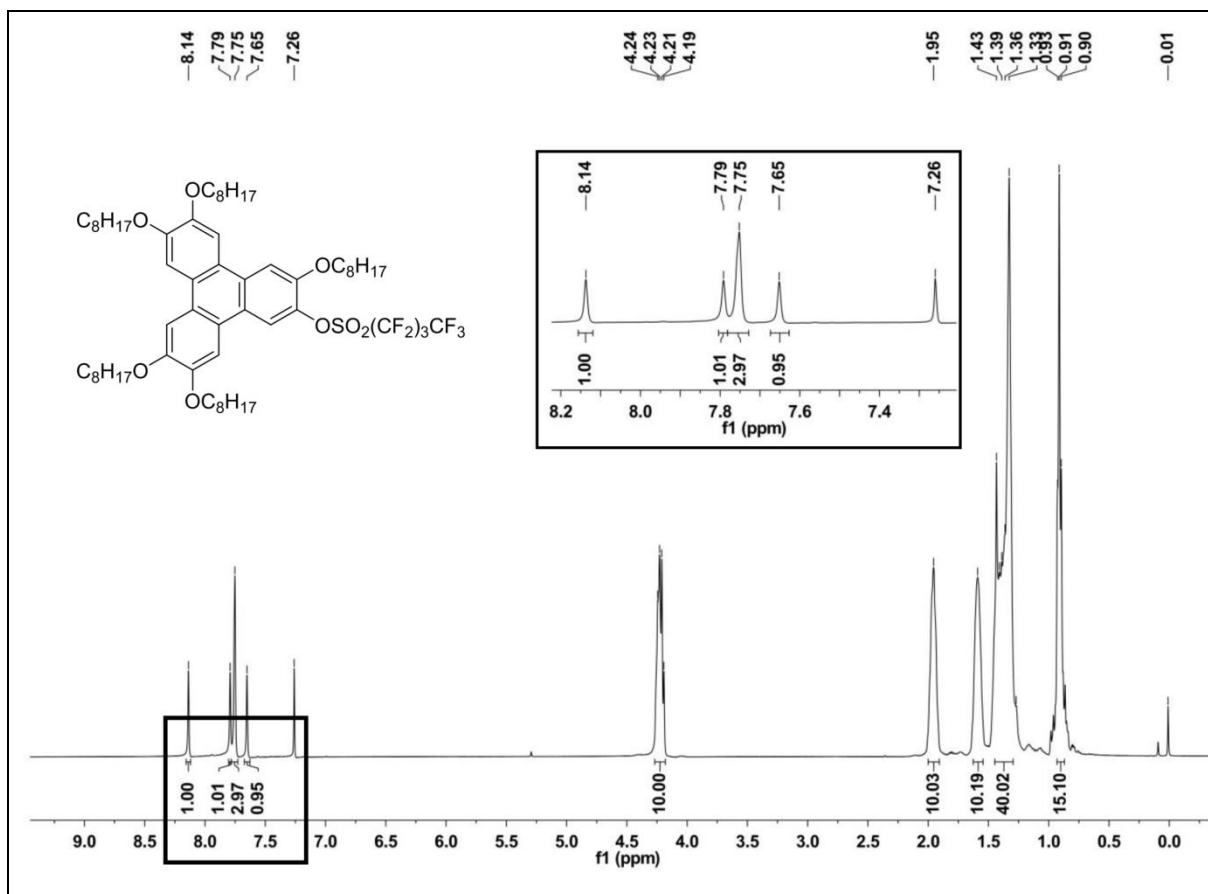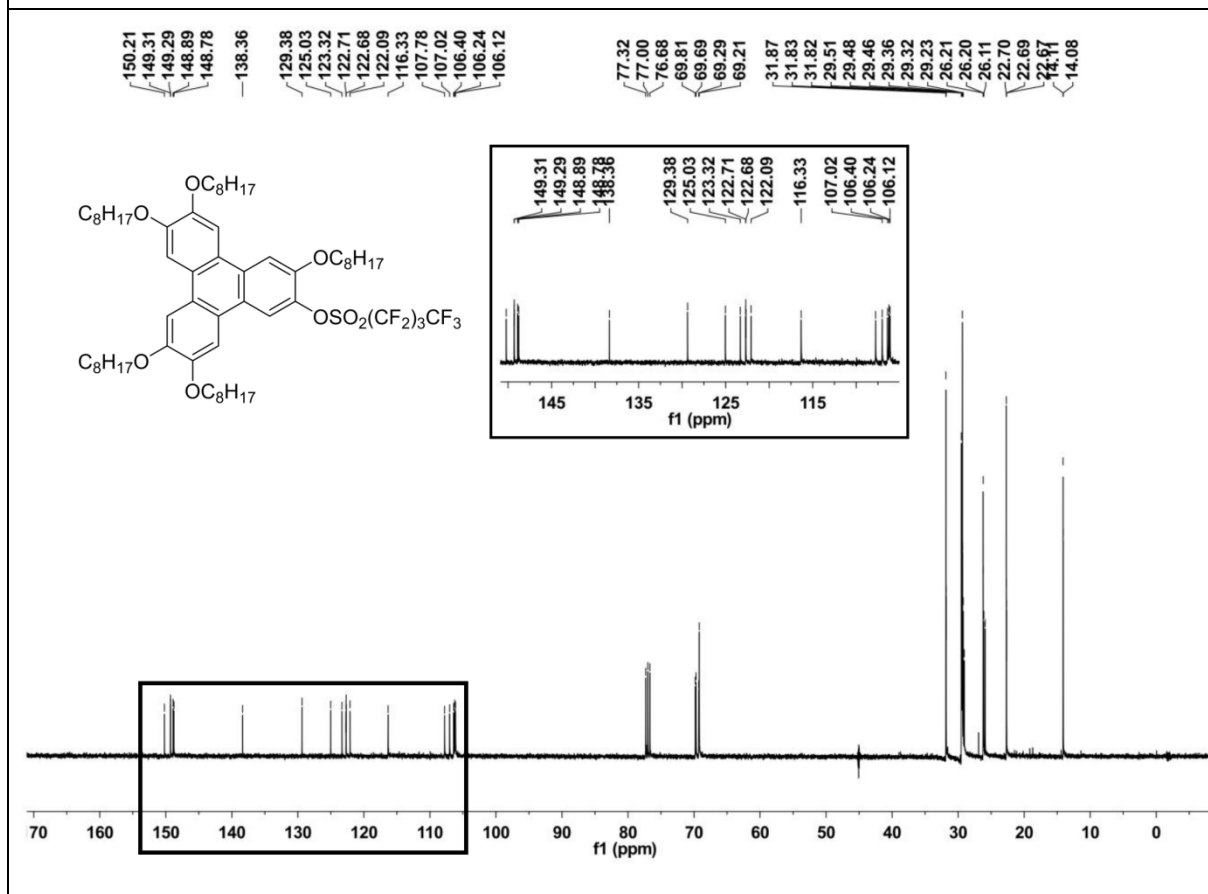

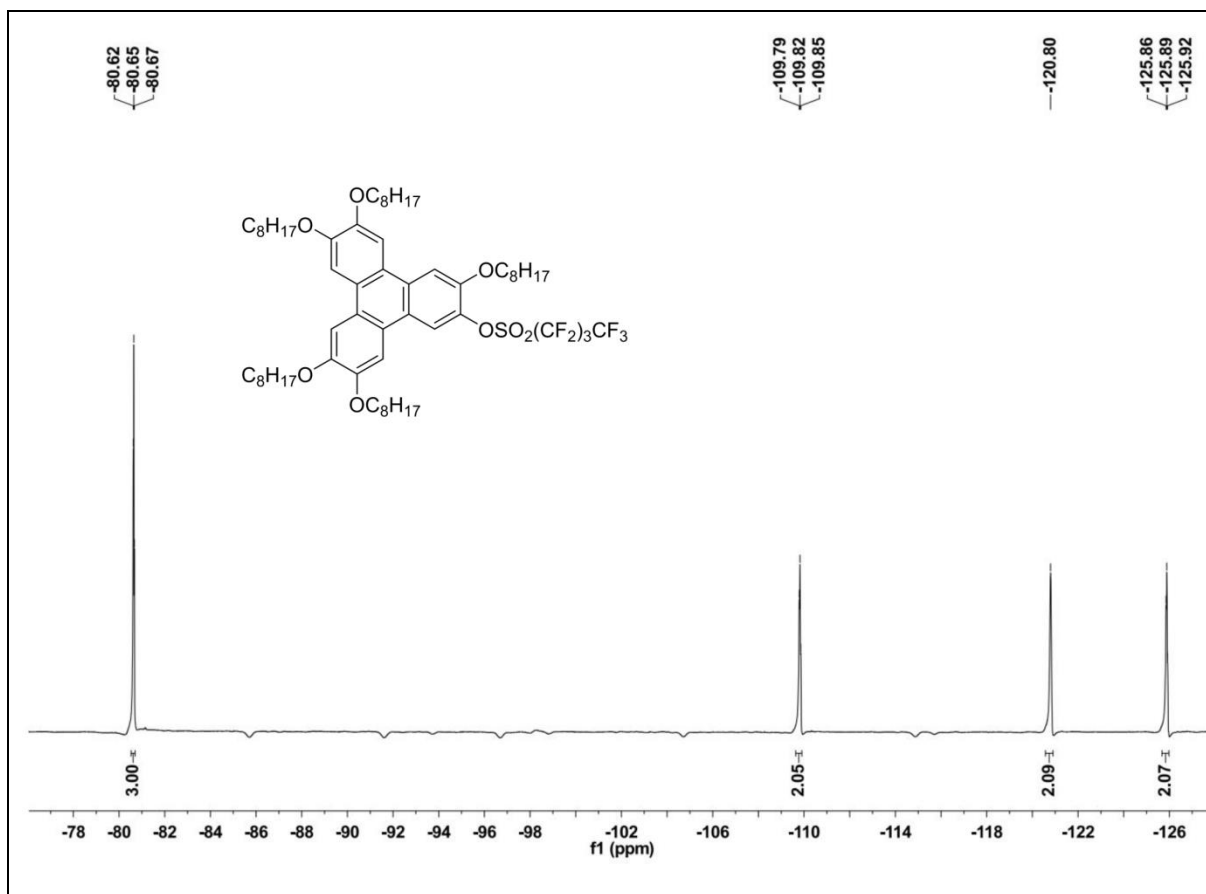

**Figure S2.**  $^1\text{H}$  NMR (CDCl<sub>3</sub>, 400 MHz),  $^{13}\text{C}$  NMR (CDCl<sub>3</sub>, 100 MHz) and  $^{19}\text{F}$  NMR (CDCl<sub>3</sub>, 376 MHz) spectra of M0-2.

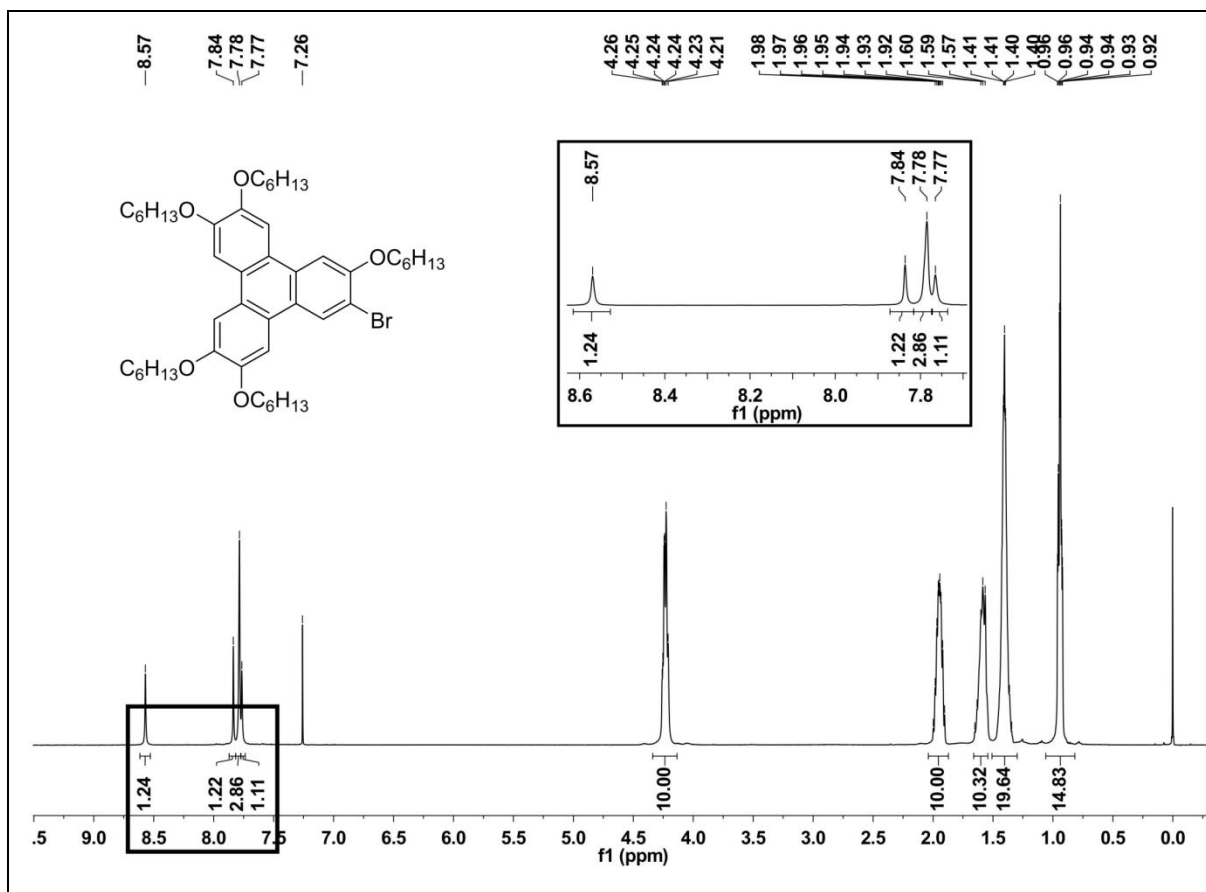

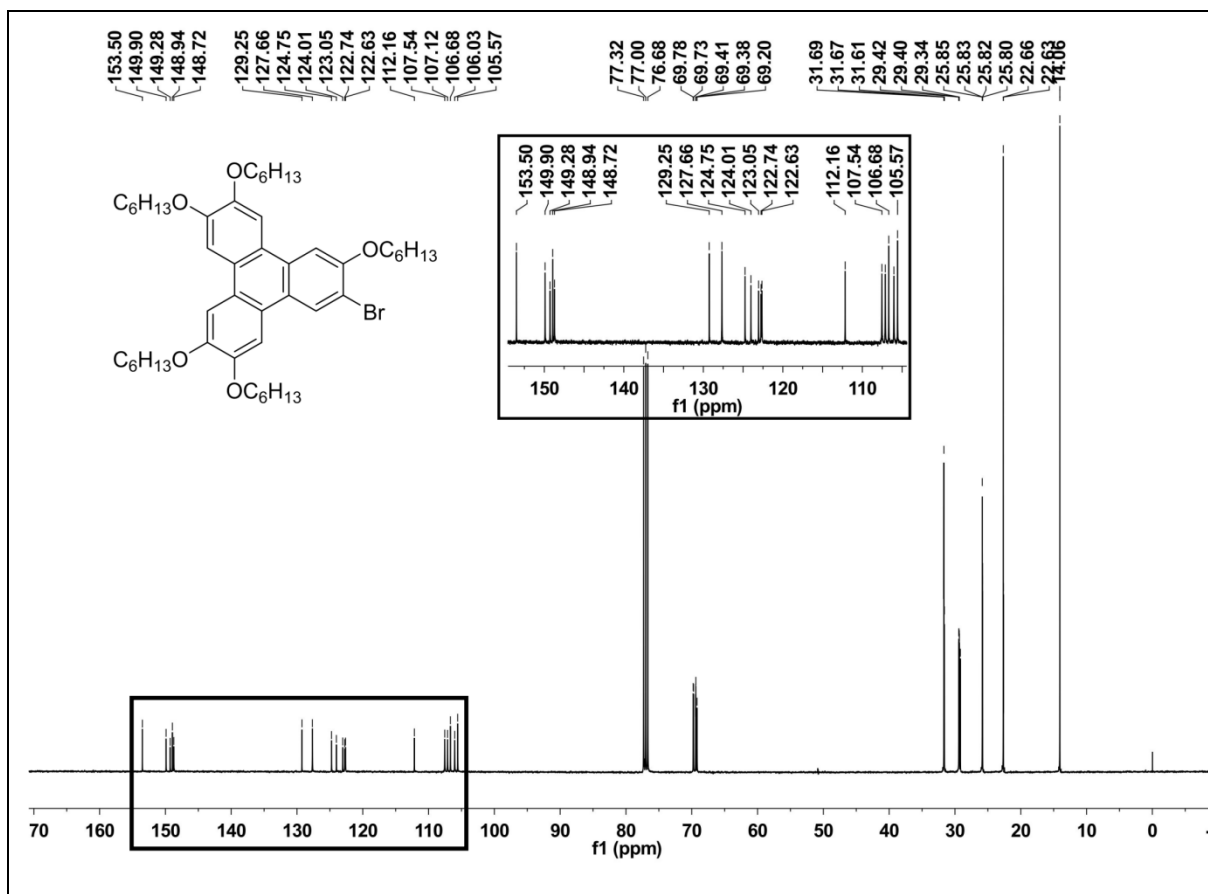

Figure S3. <sup>1</sup>H NMR (CDCl<sub>3</sub>, 400MHz) and <sup>13</sup>C NMR (CDCl<sub>3</sub>, 100 MHz) spectra of M0-3.

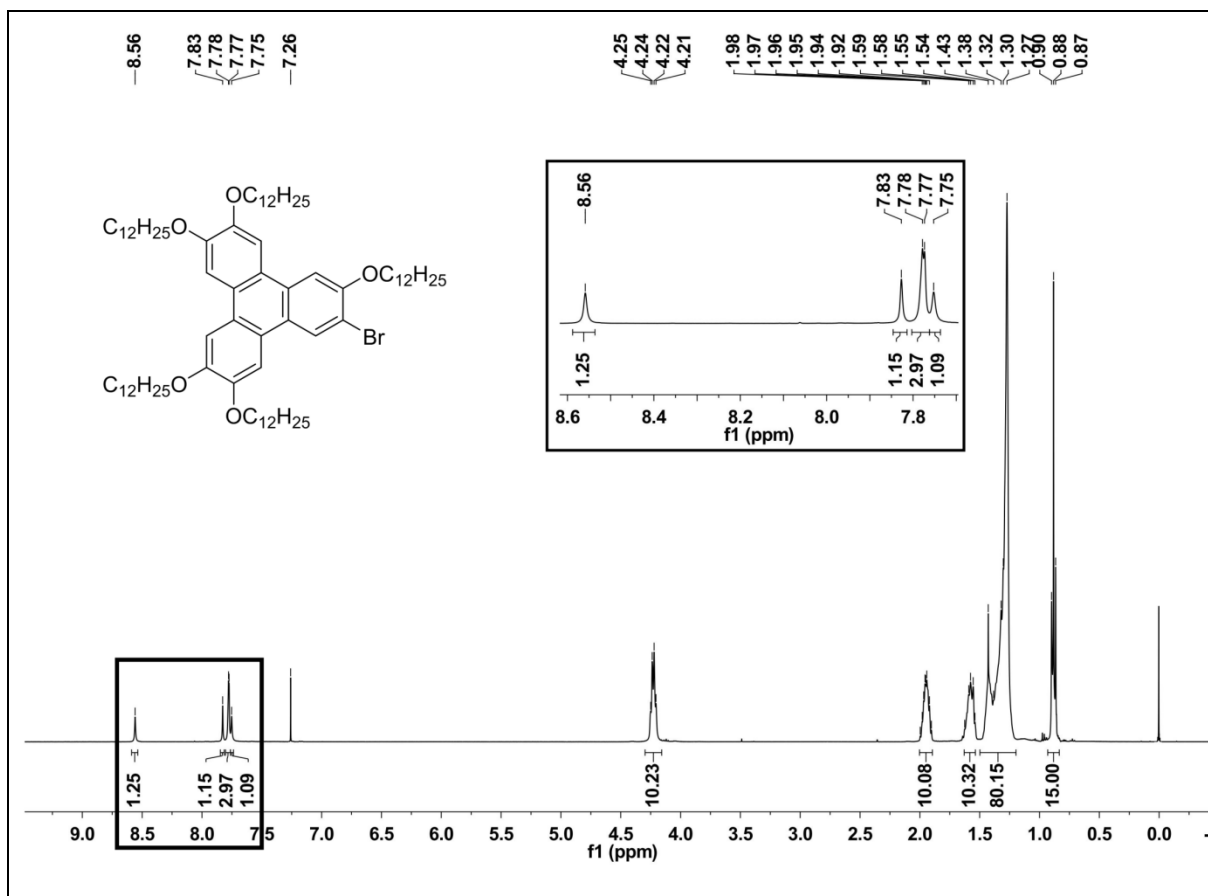

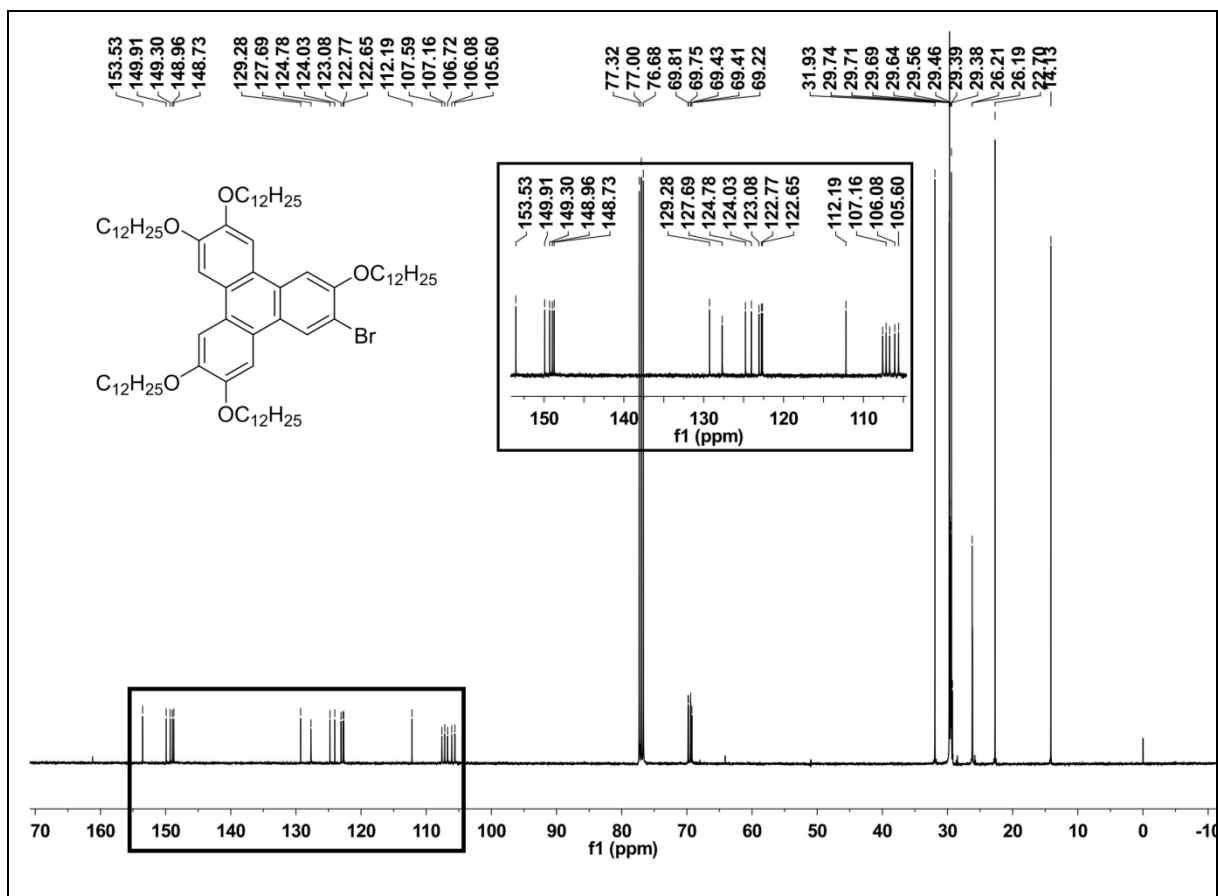

Figure S4. <sup>1</sup>H NMR (CDCl<sub>3</sub>, 400MHz) and <sup>13</sup>C NMR (CDCl<sub>3</sub>, 100 MHz) spectra of M0-4.

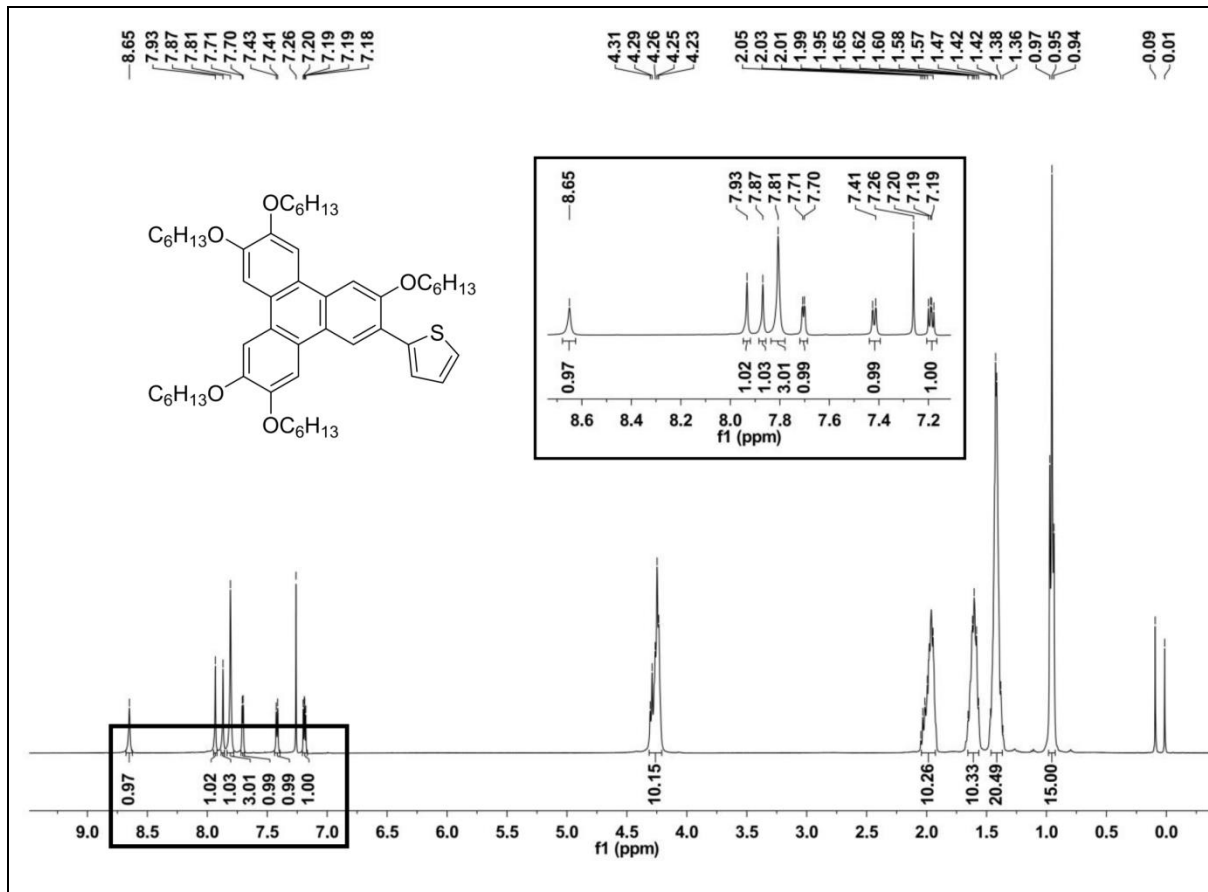

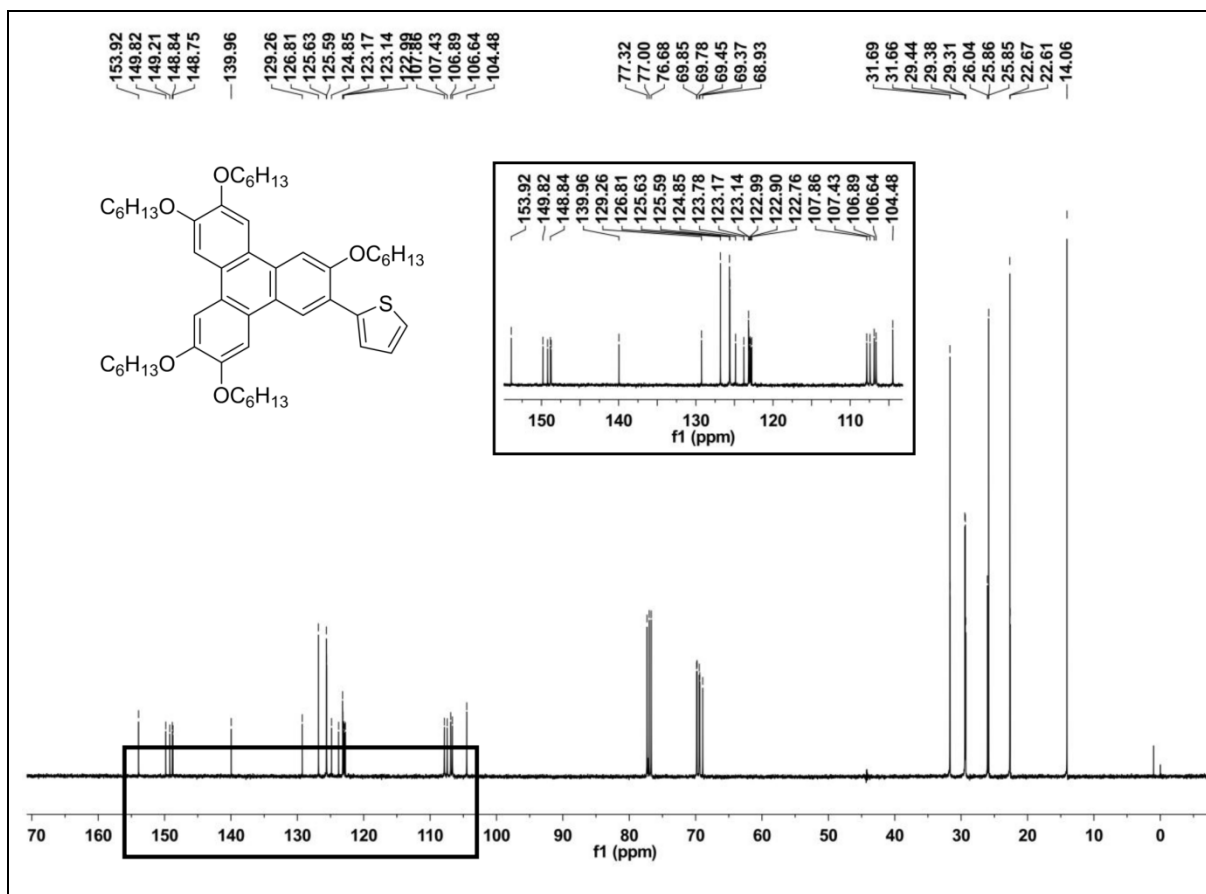

Figure S5. <sup>1</sup>H NMR (CDCl<sub>3</sub>, 400MHz) and <sup>13</sup>C NMR (CDCl<sub>3</sub>, 100 MHz) spectra of M1.

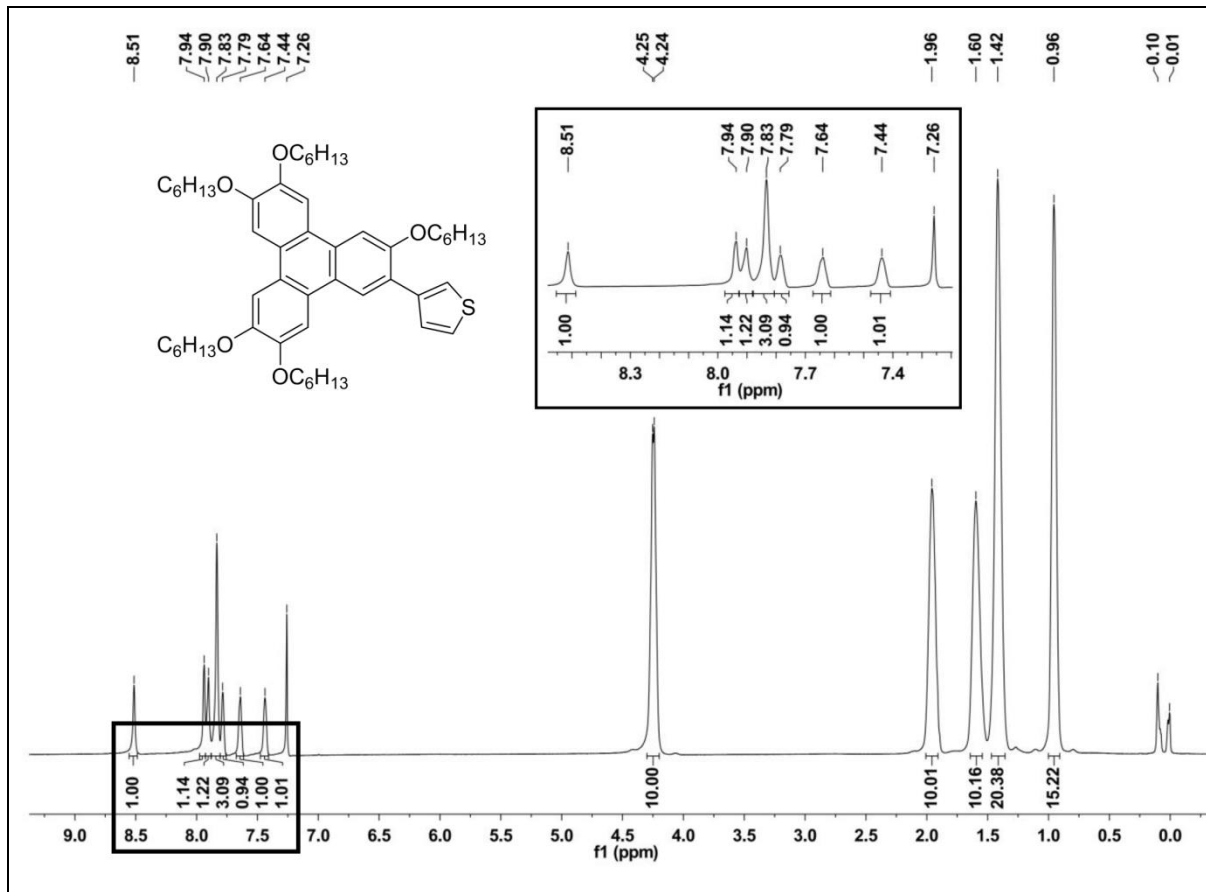

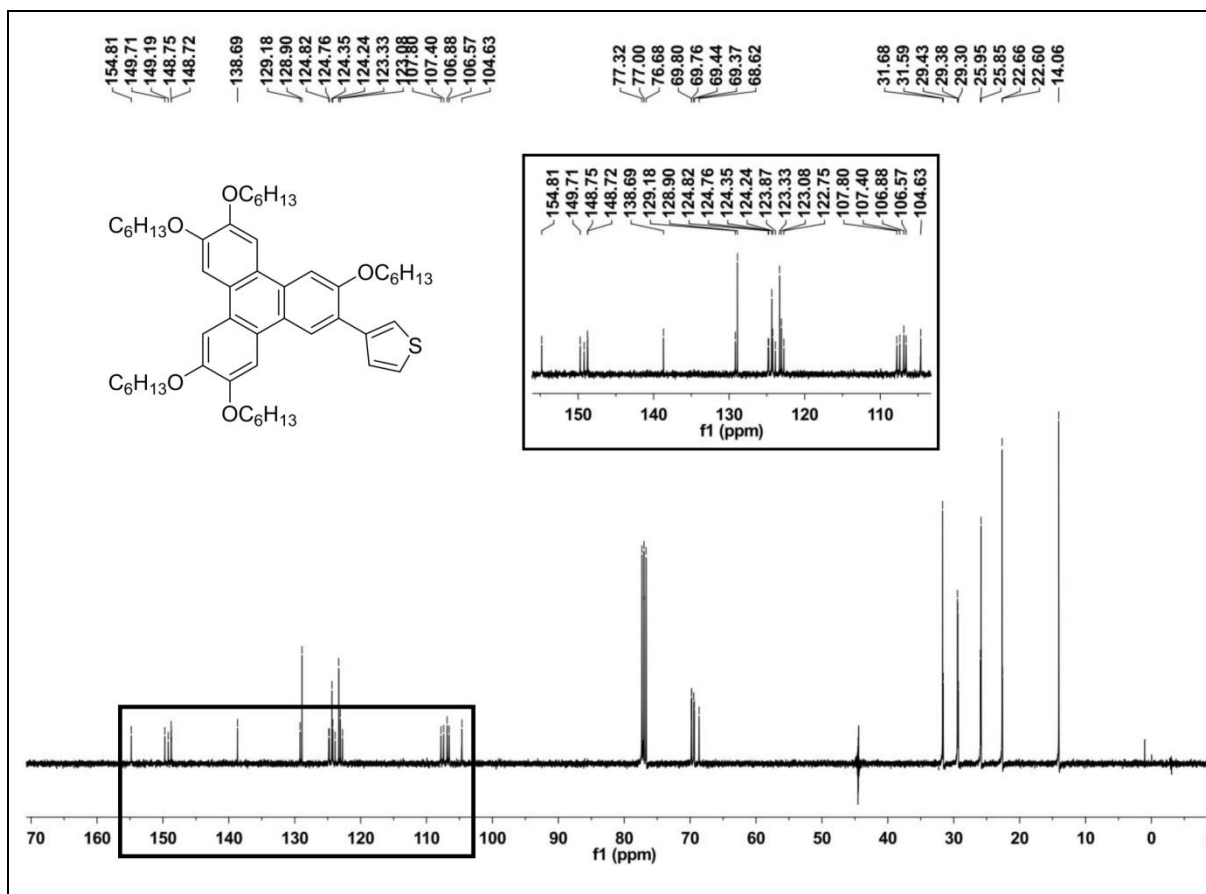

Figure S6. <sup>1</sup>H NMR (CDCl<sub>3</sub>, 400MHz) and <sup>13</sup>C NMR (CDCl<sub>3</sub>, 100 MHz) spectra of M2.

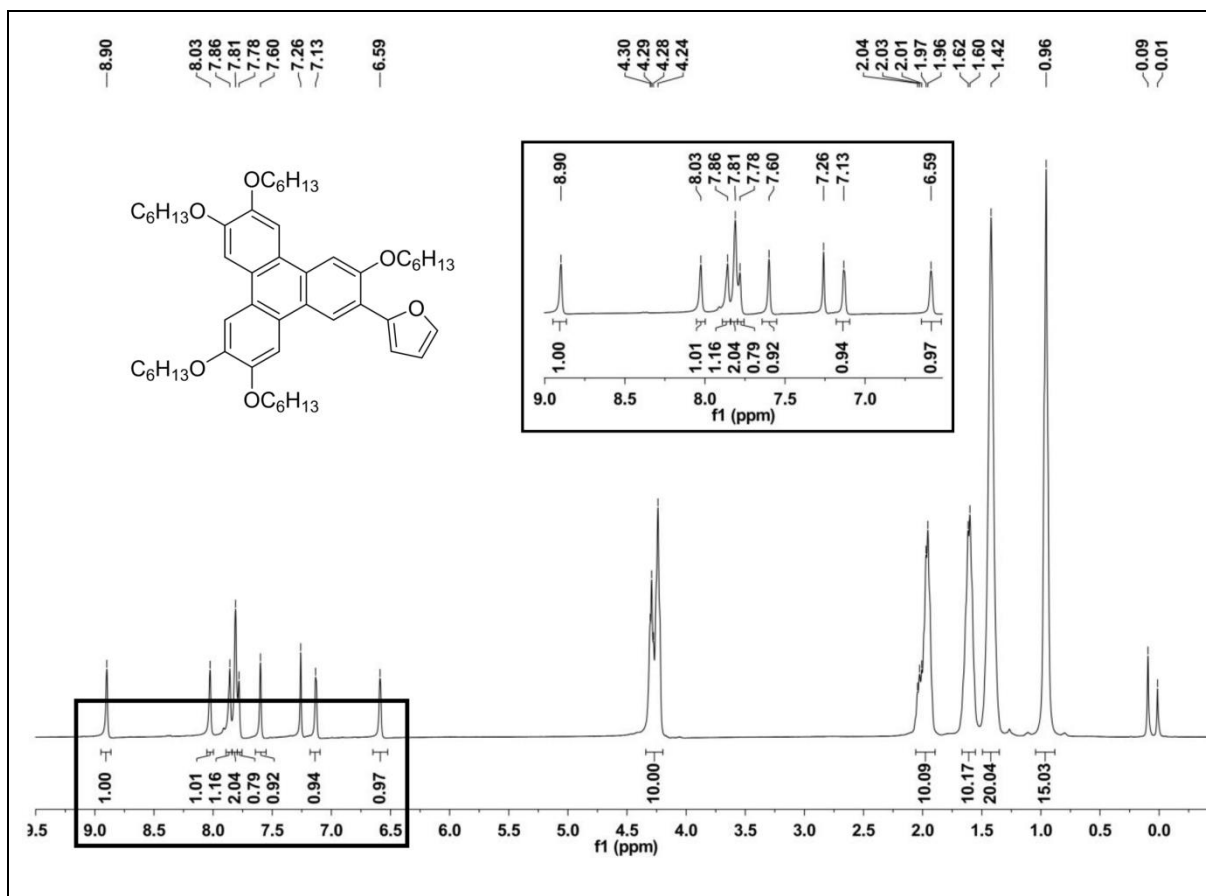

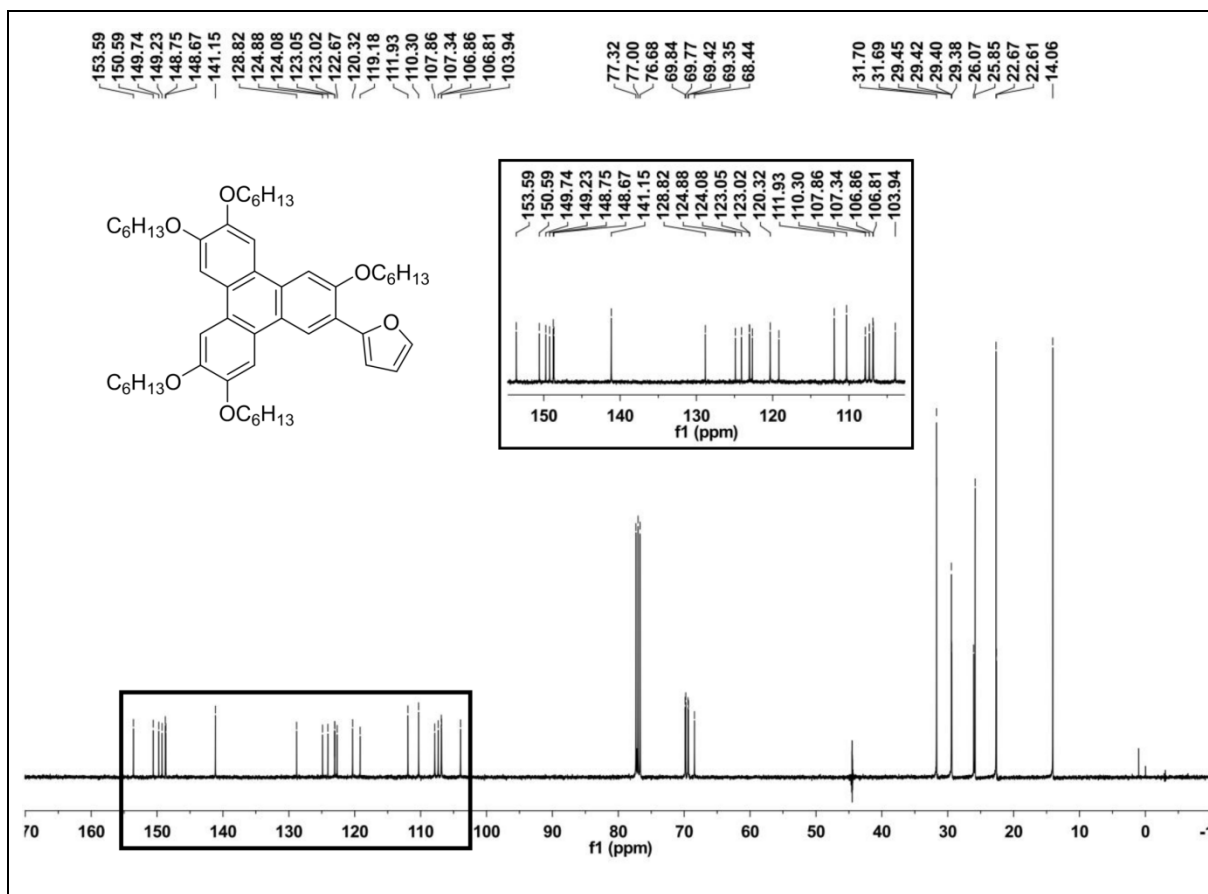

Figure S7. <sup>1</sup>H NMR (CDCl<sub>3</sub>, 400MHz) and <sup>13</sup>C NMR (CDCl<sub>3</sub>, 100 MHz) spectra of M3.

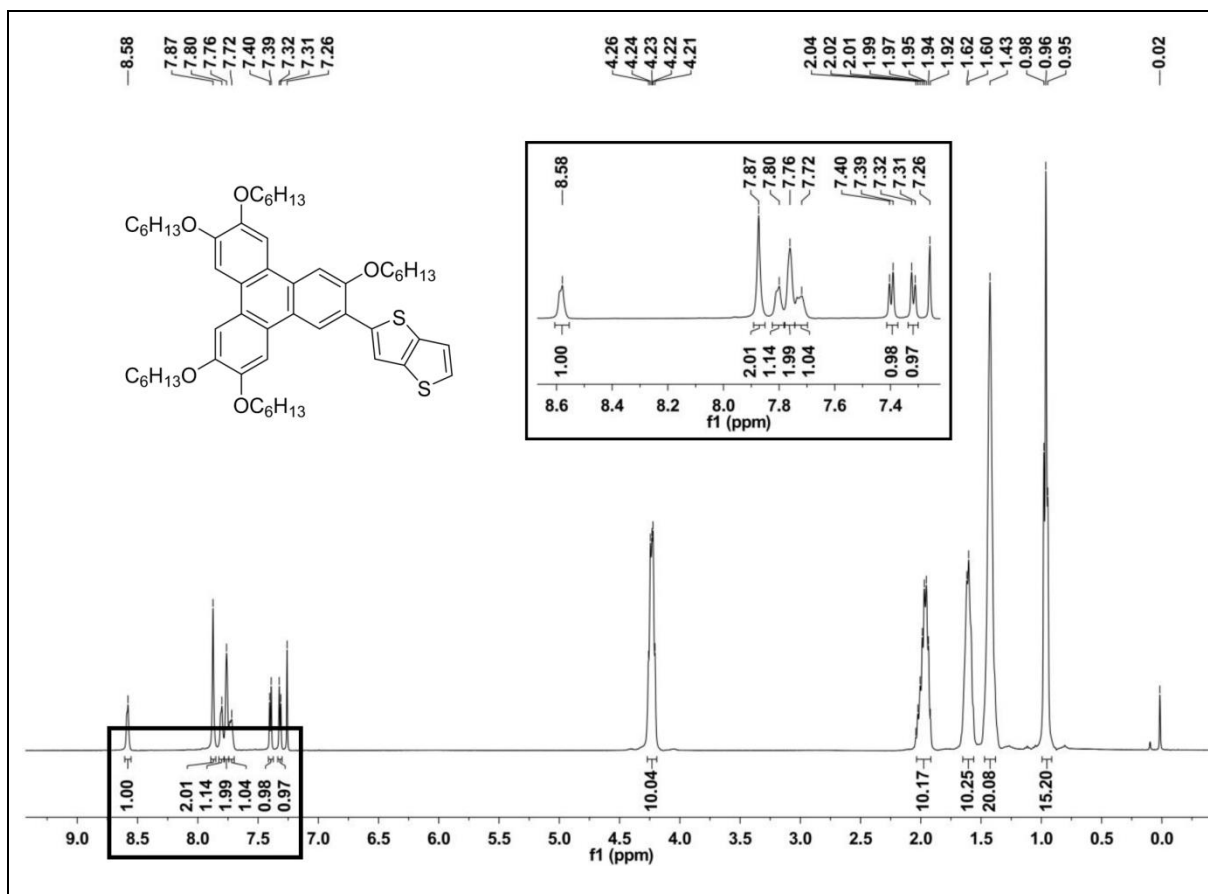

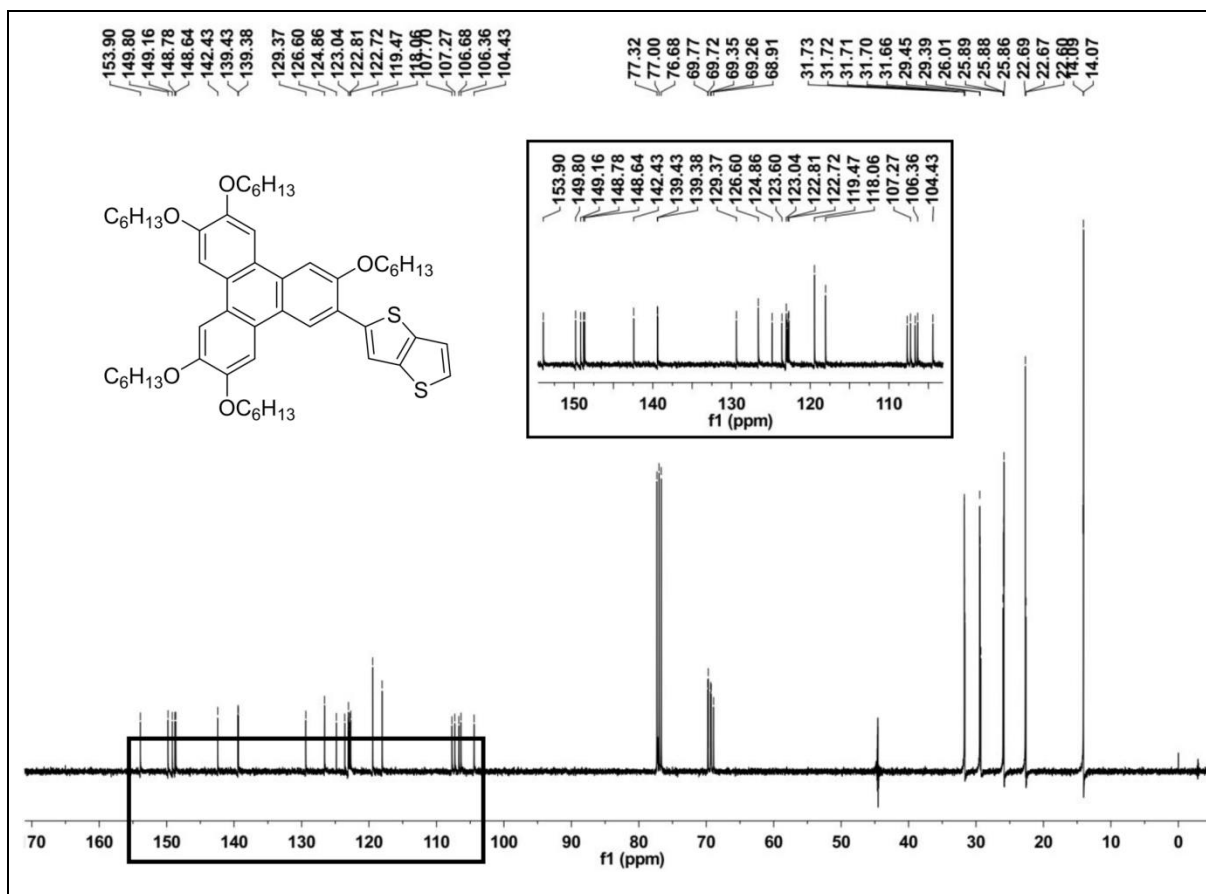

**Figure S8.** <sup>1</sup>H NMR (CDCl<sub>3</sub>, 400MHz) and <sup>13</sup>C NMR (CDCl<sub>3</sub>, 100 MHz) spectra of **M4**.

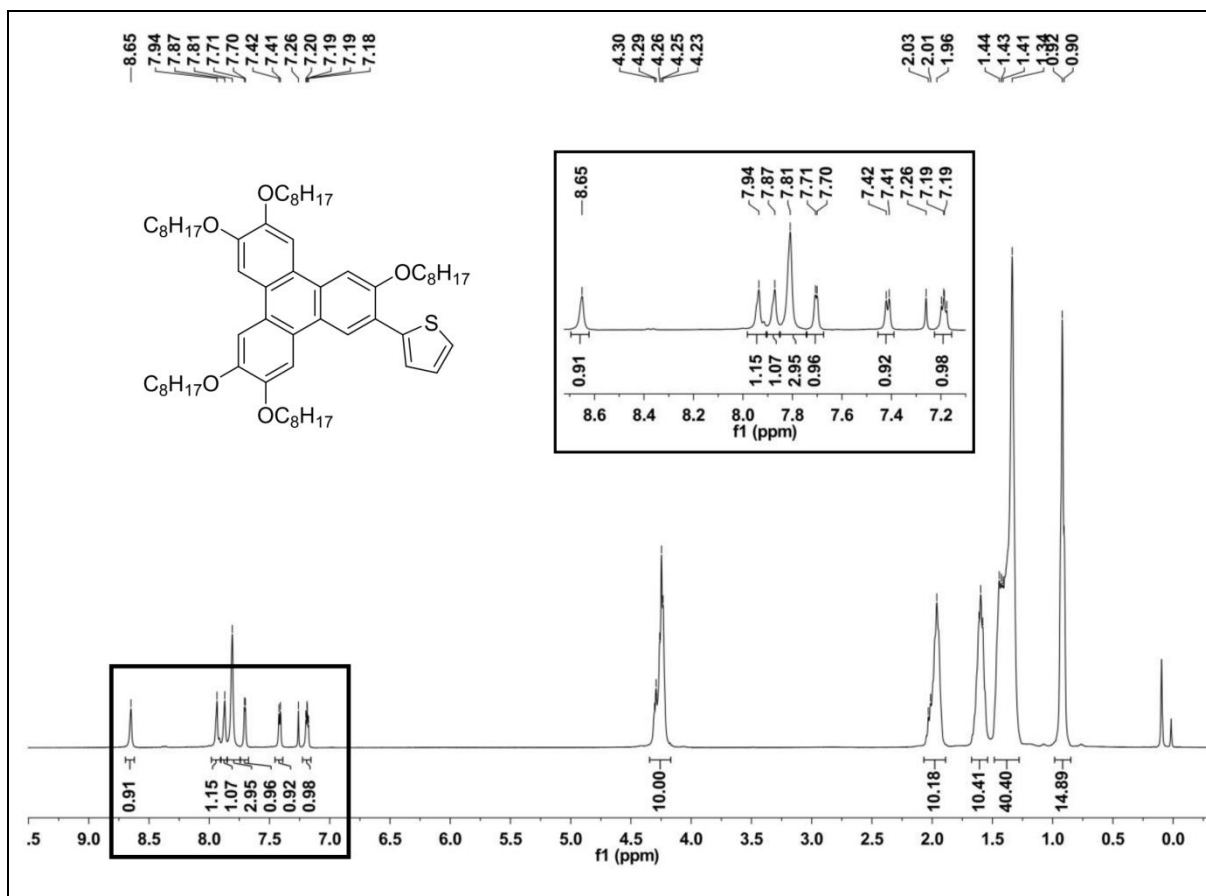



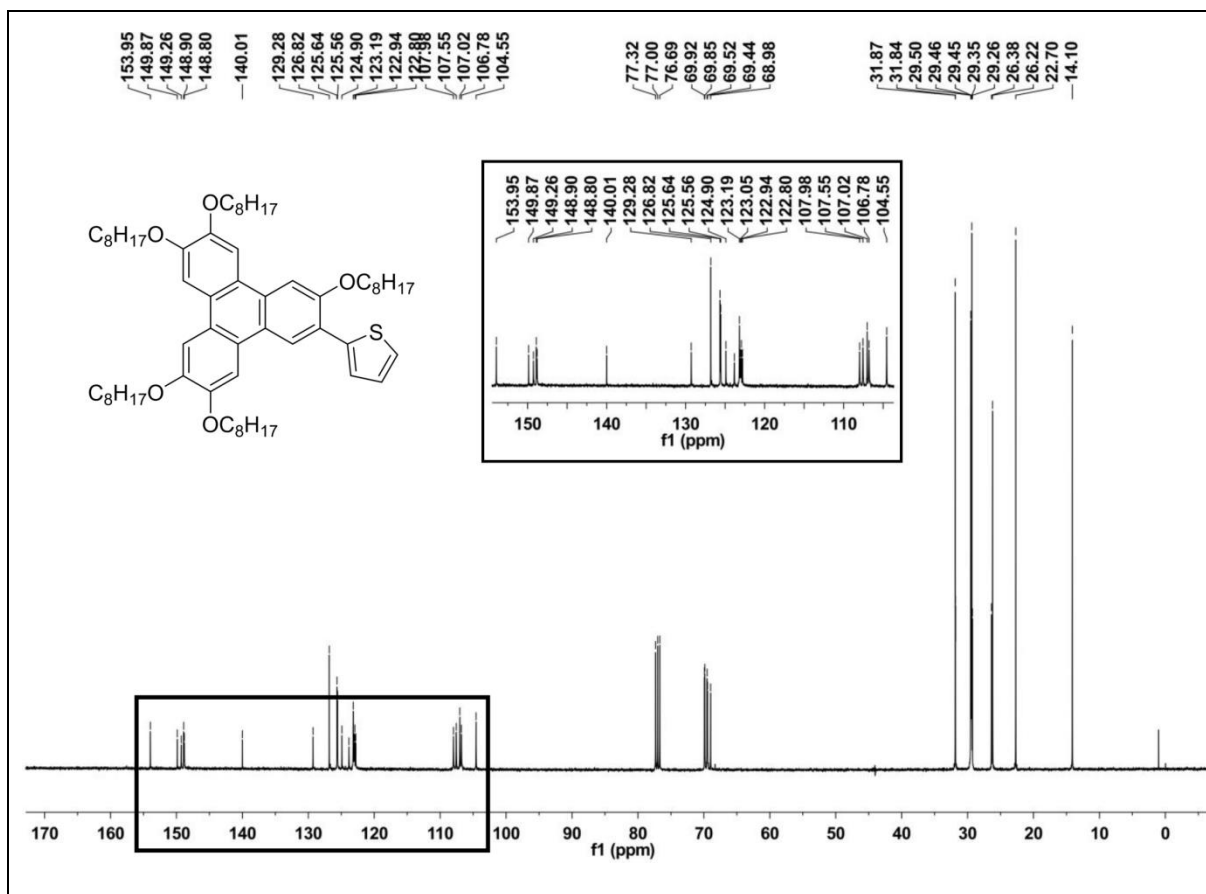

Figure S9. <sup>1</sup>H NMR (CDCl<sub>3</sub>, 400MHz) and <sup>13</sup>C NMR (CDCl<sub>3</sub>, 100 MHz) spectra of M5.

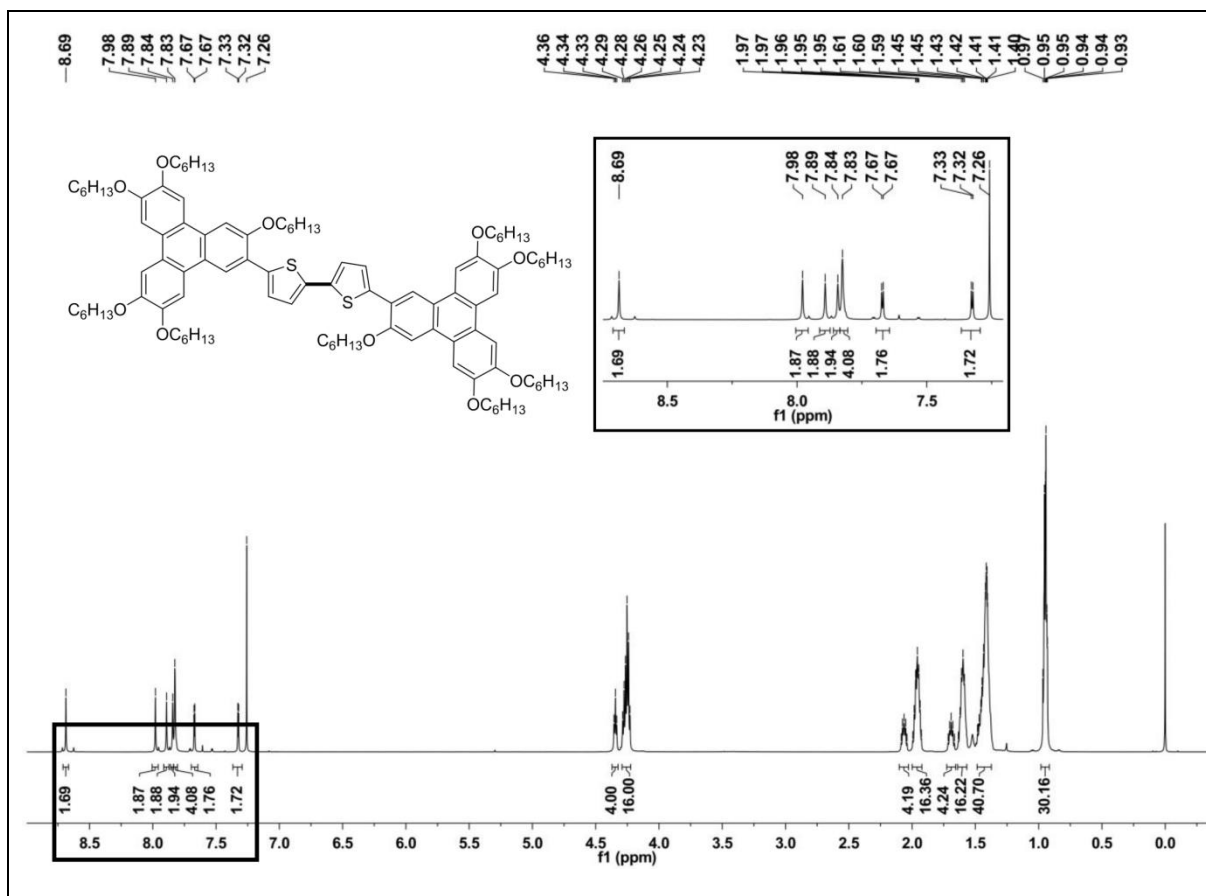

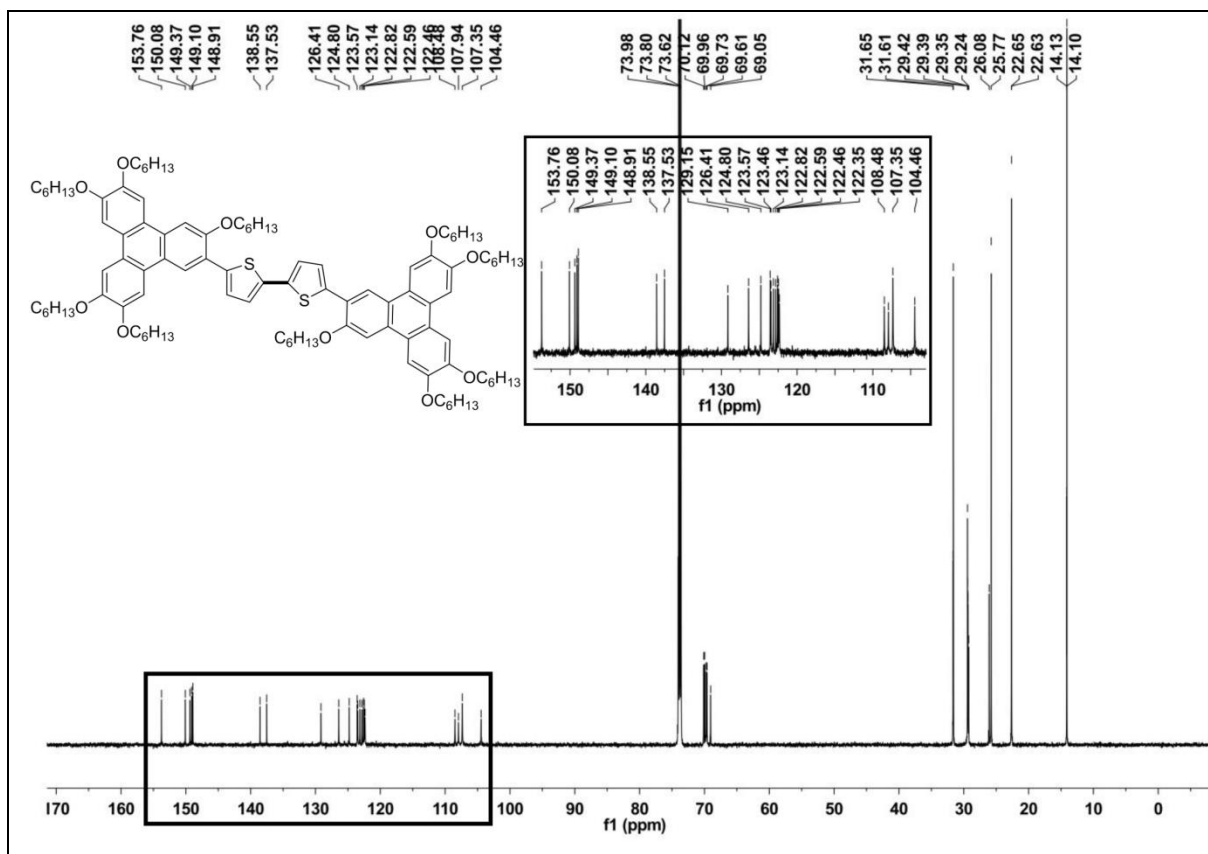

Figure S10.  $^1\text{H}$  NMR ( $\text{CDCl}_3$ , 600MHz) and  $^{13}\text{C}$  NMR ( $\text{C}_2\text{D}_2\text{Cl}_4$ , 151 MHz) spectra of  $\text{Tp}^6\text{Th}_2\text{Tp}^6$ .

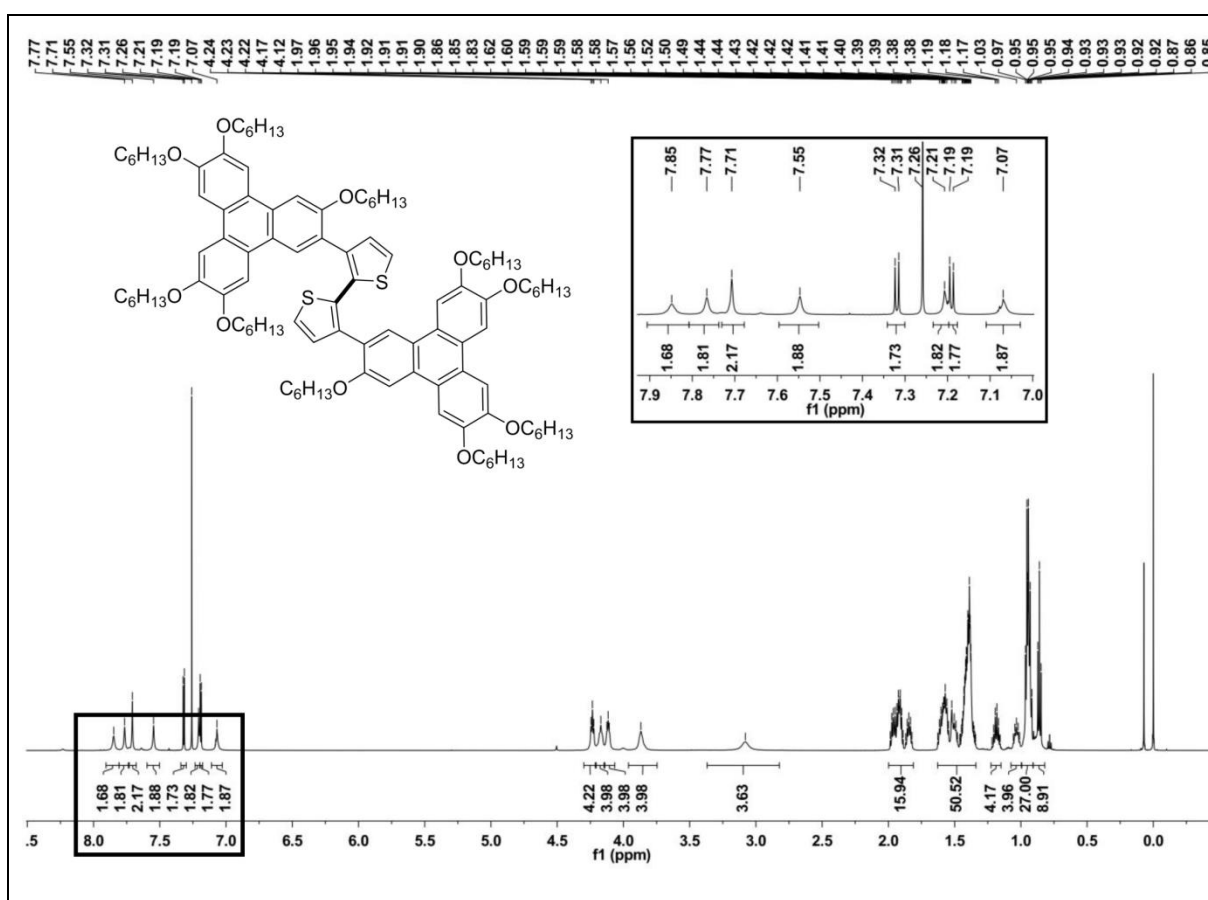

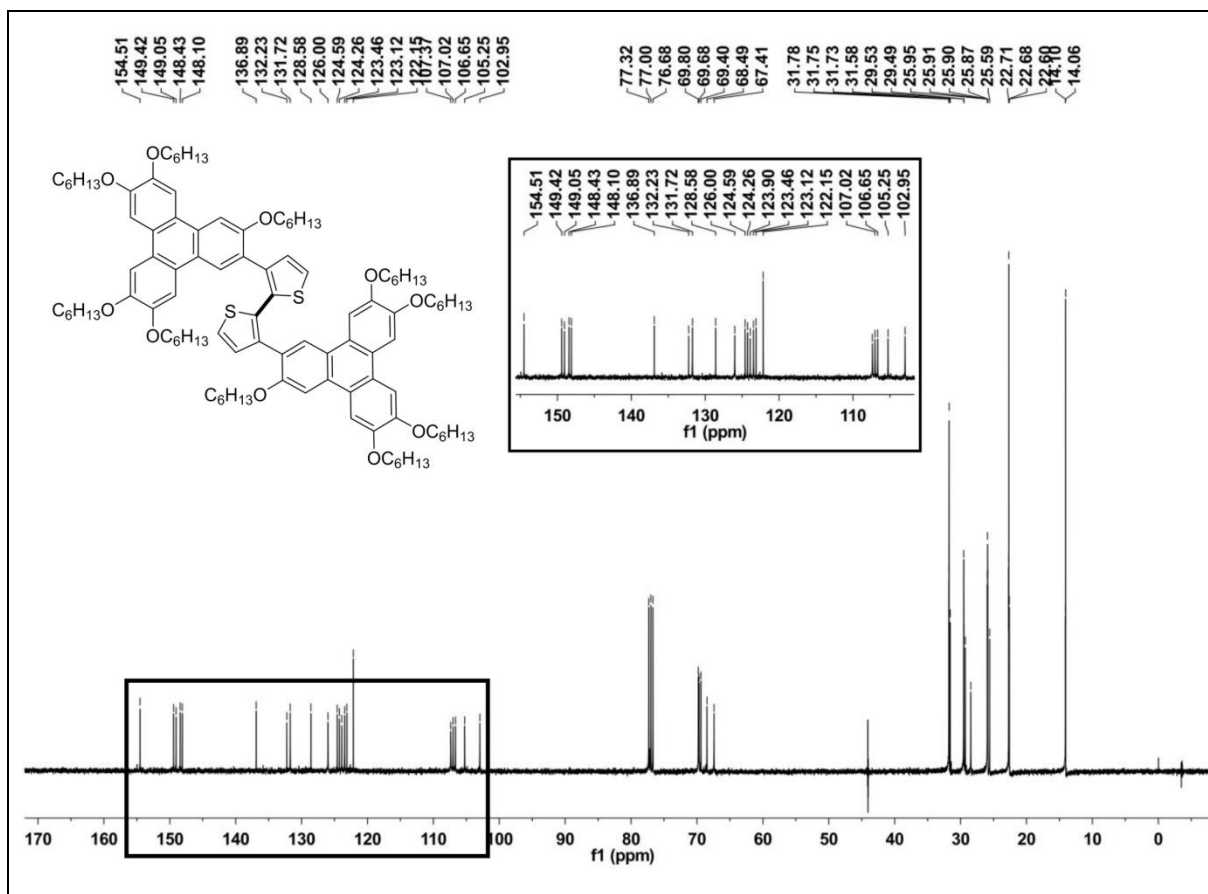

**Figure S11.** <sup>1</sup>H NMR (CDCl<sub>3</sub>, 600MHz) and <sup>13</sup>C NMR (CDCl<sub>3</sub>, 100 MHz) spectra of **Tp<sup>6</sup>β-Th<sub>2</sub>Tp<sup>6</sup>**.

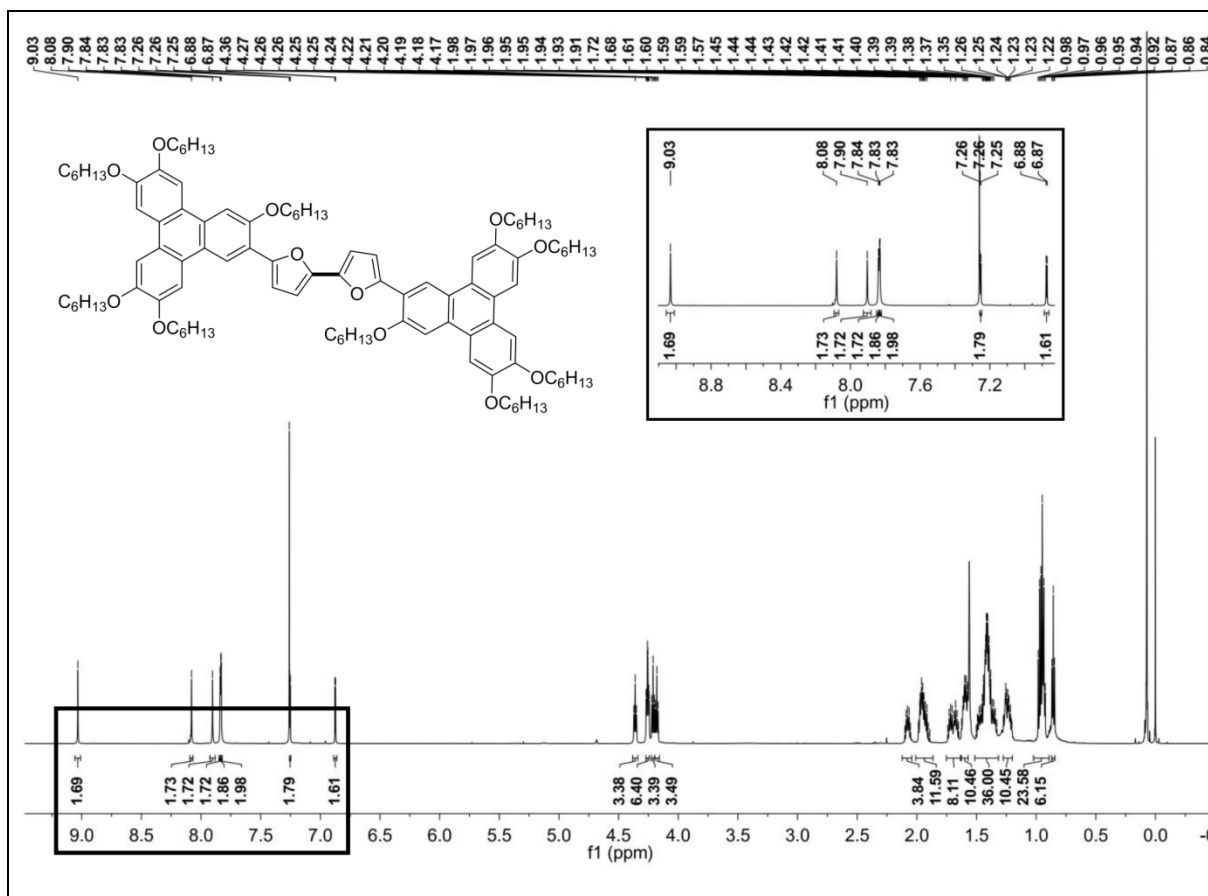

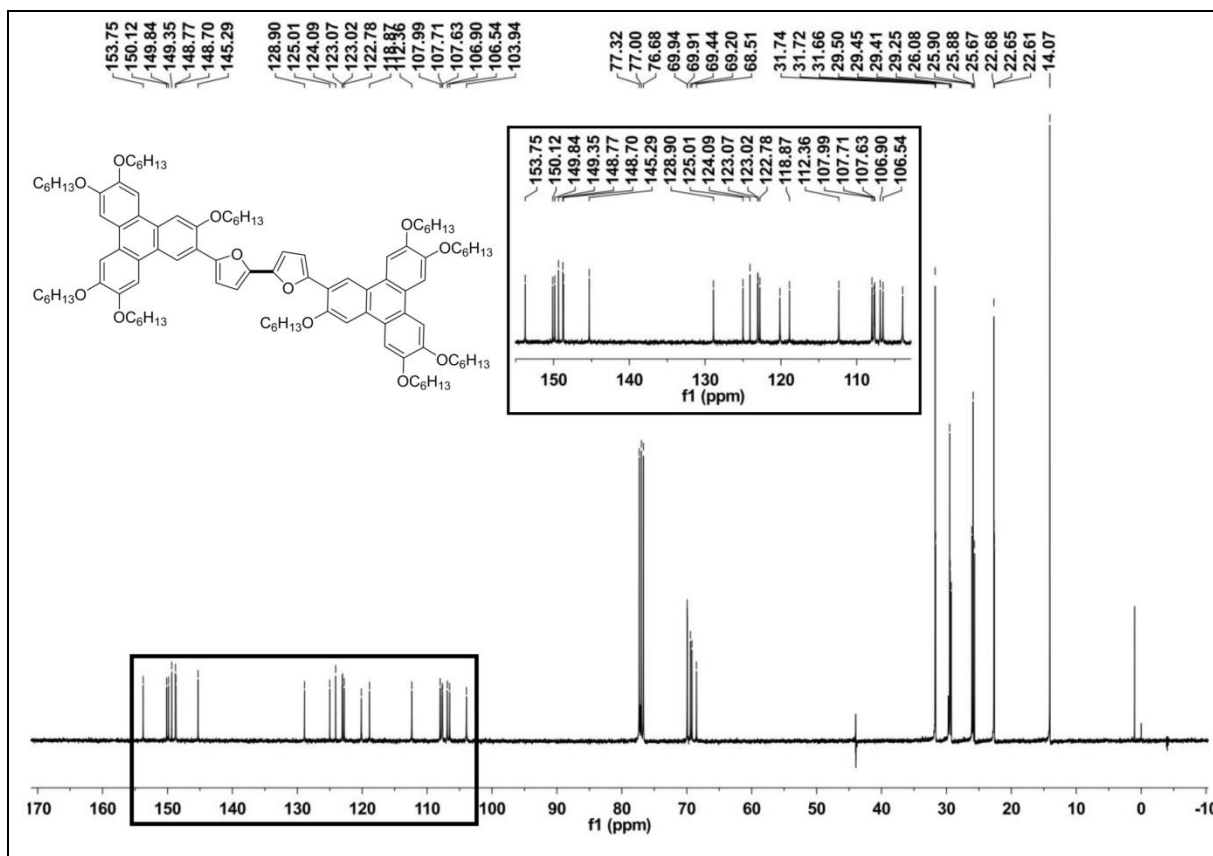

**Figure S12.** <sup>1</sup>H NMR (CDCl<sub>3</sub>, 600MHz) and <sup>13</sup>C NMR (CDCl<sub>3</sub>, 100 MHz) spectra of **Tp<sup>6</sup>Fu<sub>2</sub>Tp<sup>6</sup>**.

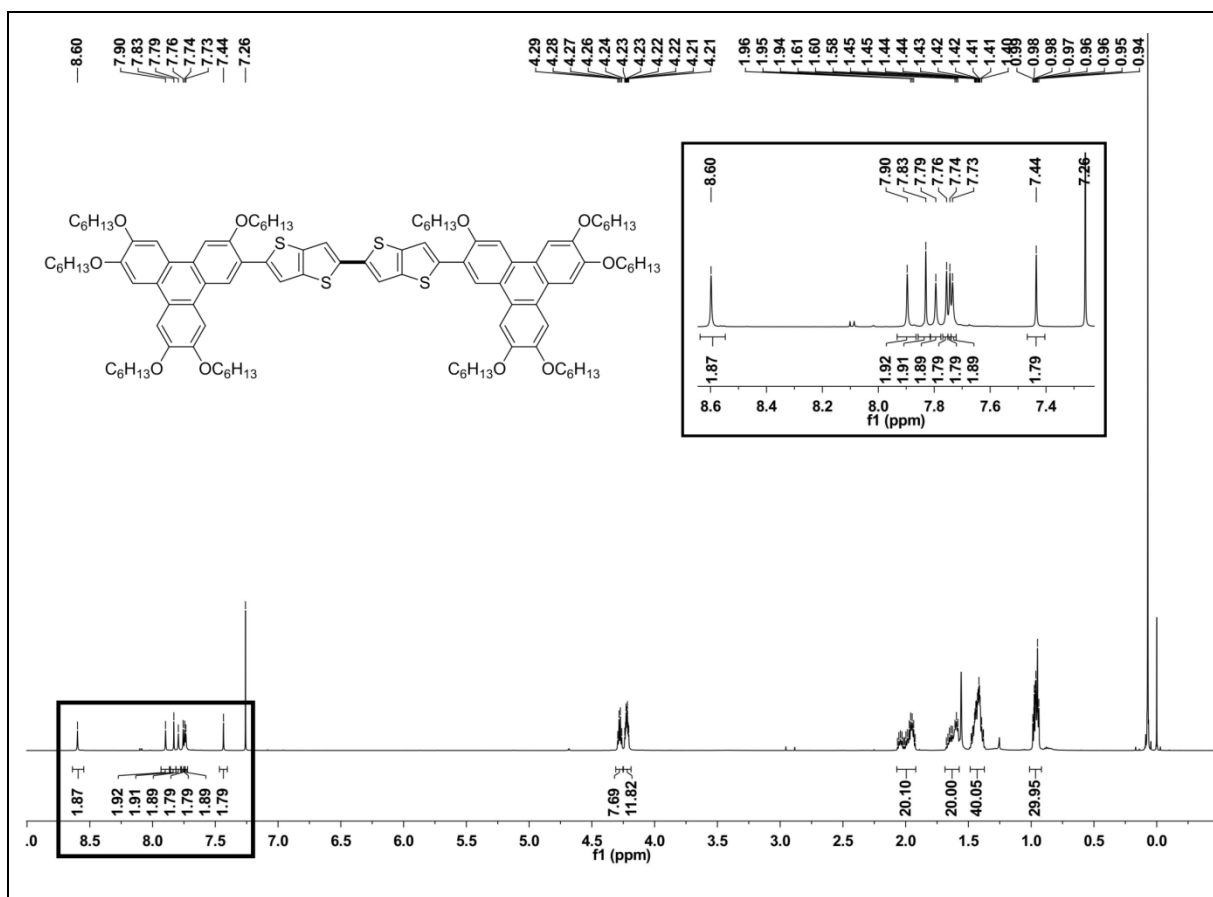

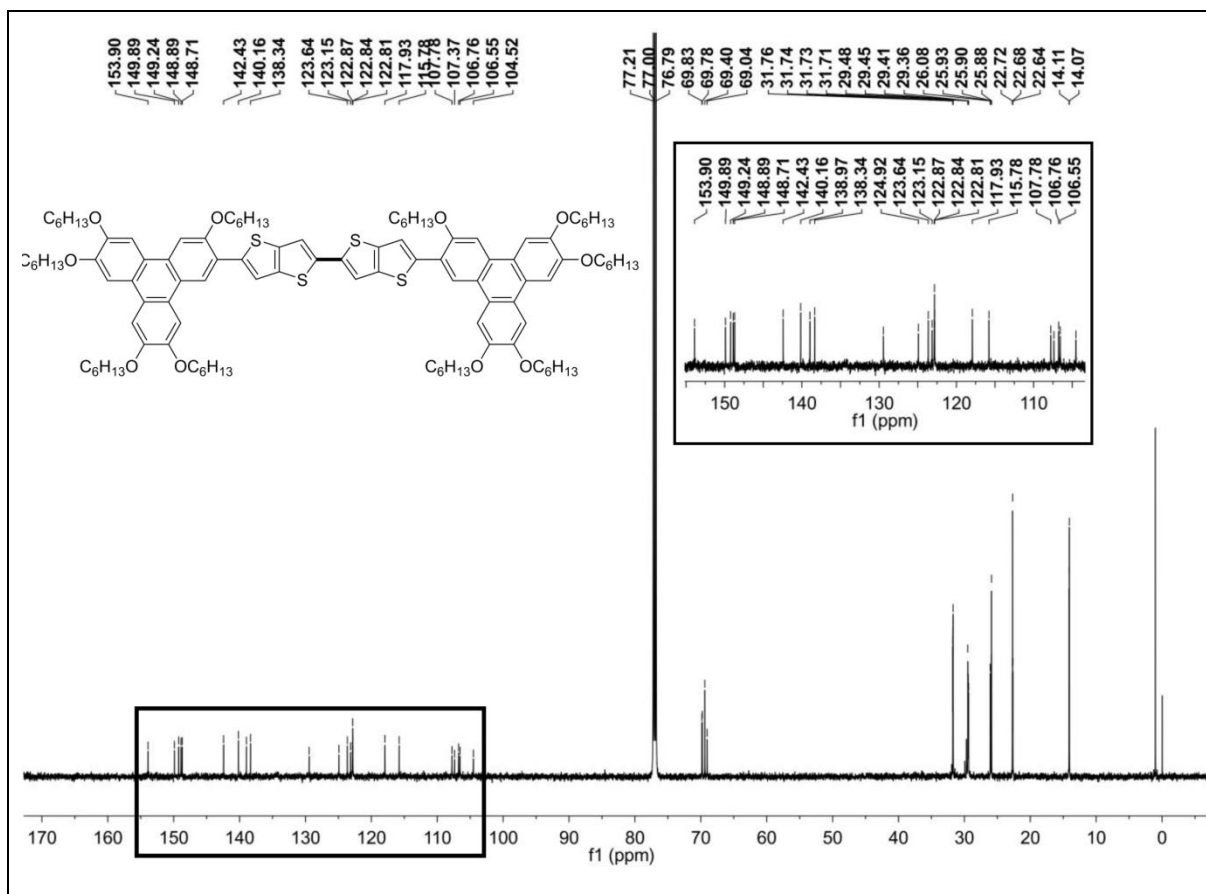

Figure S13.  $^1\text{H}$  NMR ( $\text{CDCl}_3$ , 600MHz) and  $^{13}\text{C}$  NMR ( $\text{CDCl}_3$ , 151 MHz) spectra of  $\text{Tp}^6\text{Tt}_2\text{Tp}^6$ .

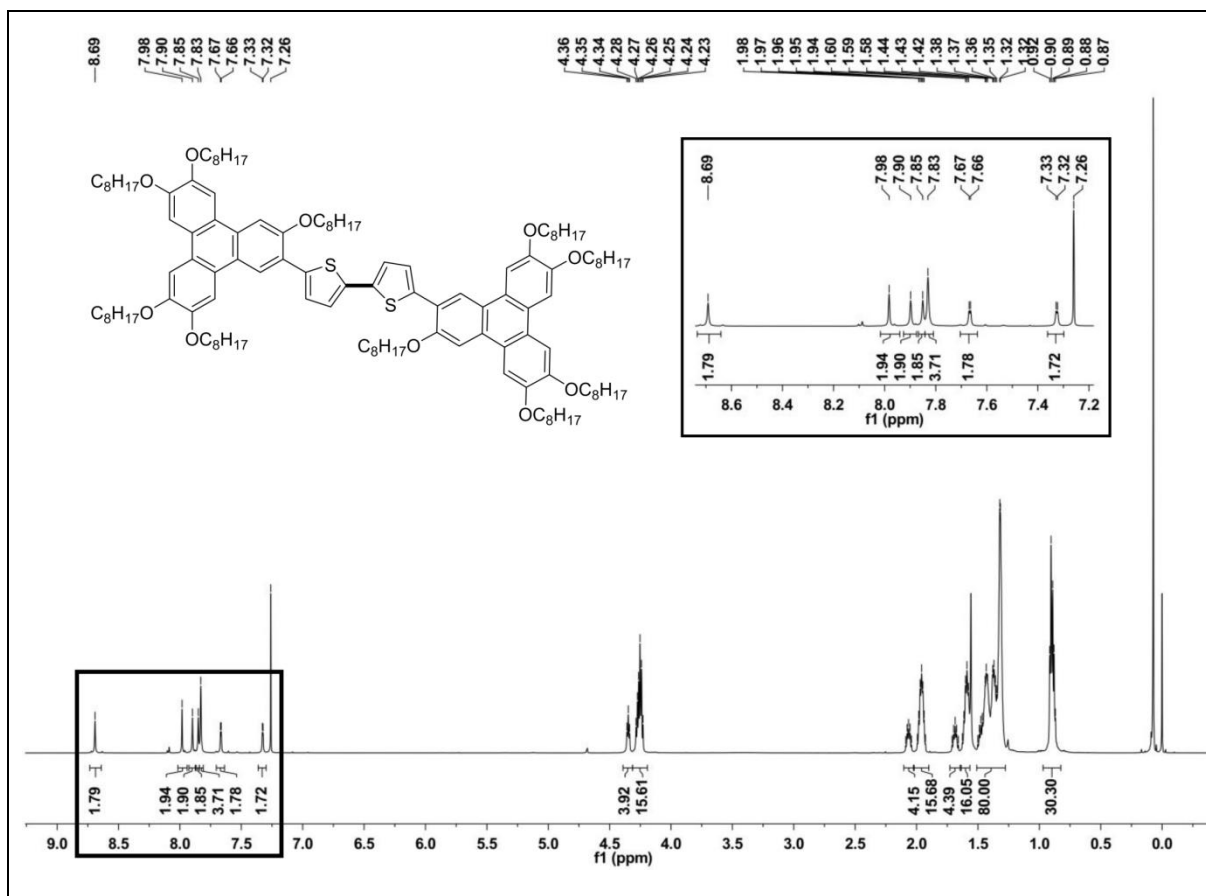

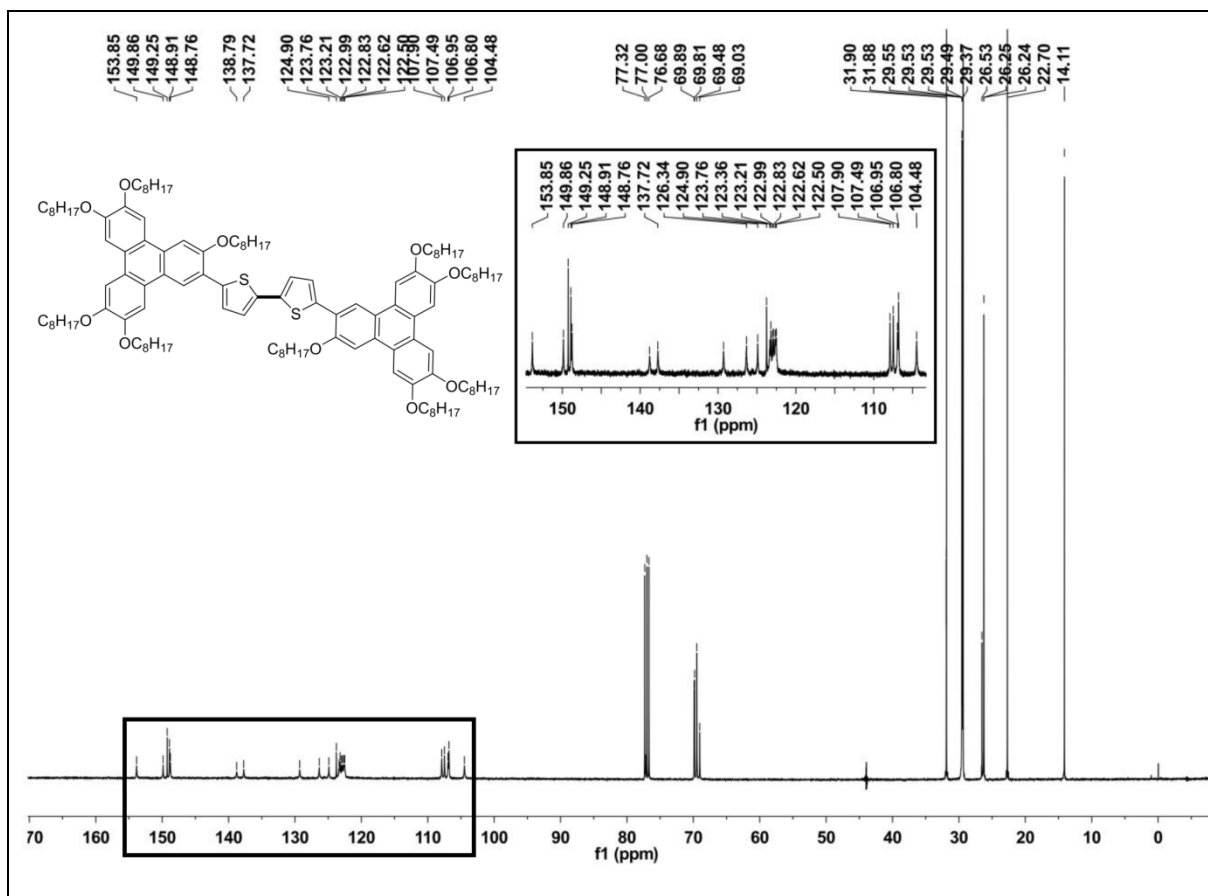

**Figure S14.** <sup>1</sup>H NMR (CDCl<sub>3</sub>, 600MHz) and <sup>13</sup>C NMR (CDCl<sub>3</sub>, 100 MHz) spectra of **Tp<sup>8</sup>Th<sub>2</sub>Tp<sup>8</sup>**.

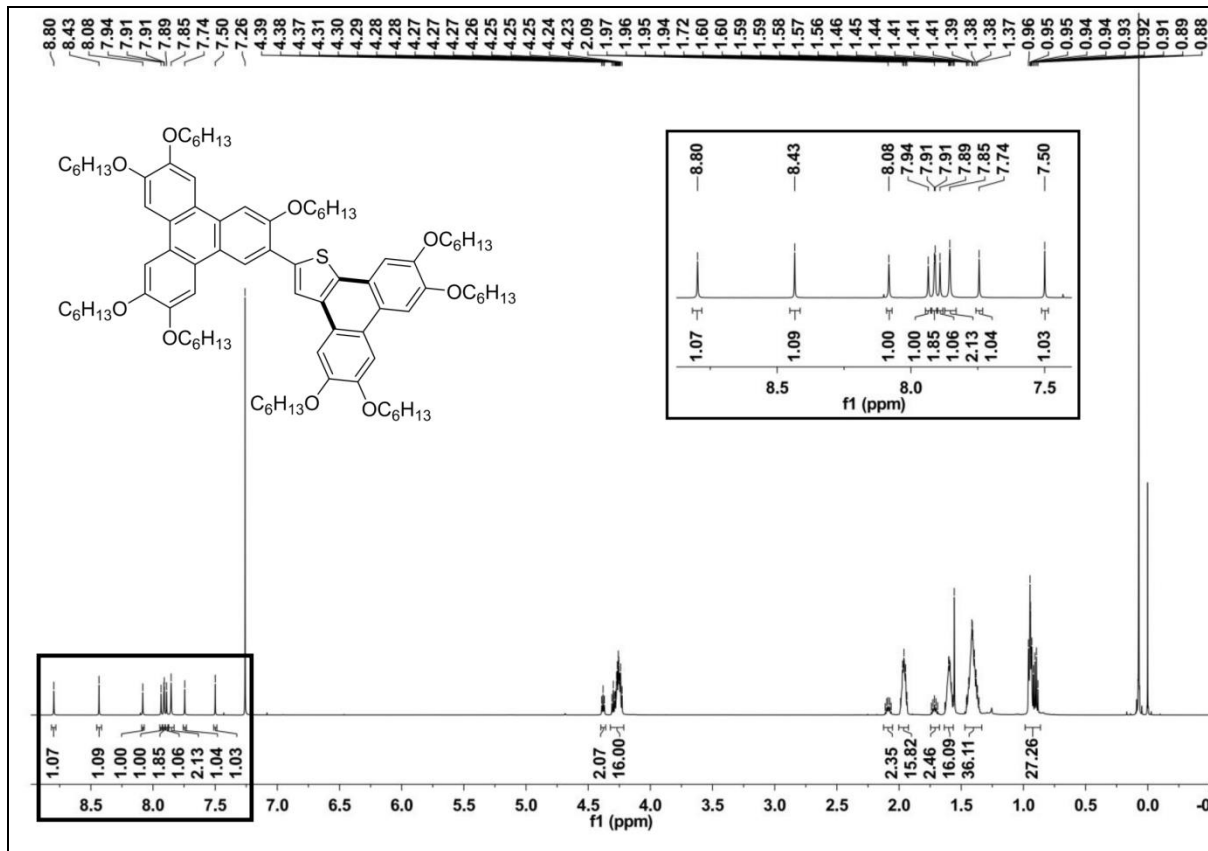

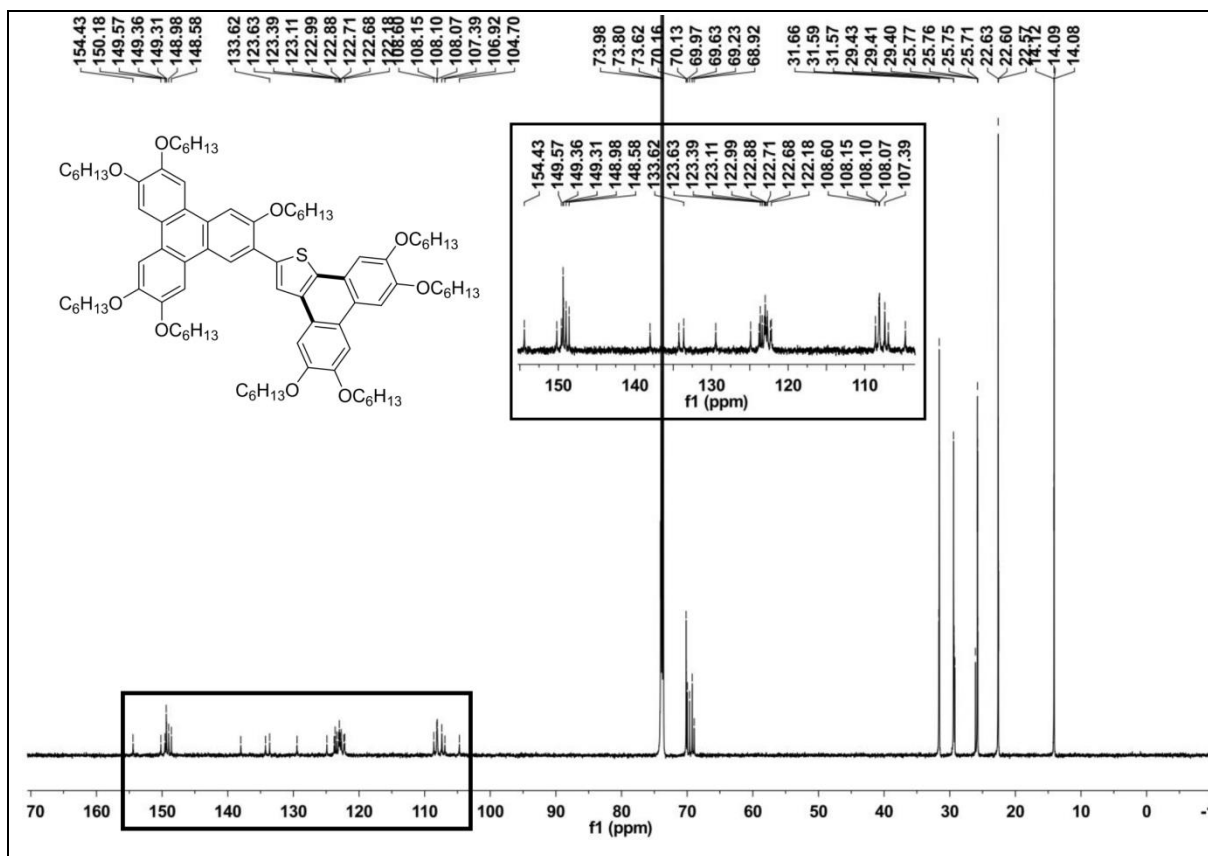

Figure S15.  $^1\text{H}$  NMR ( $\text{CDCl}_3$ , 600MHz) and  $^{13}\text{C}$  NMR ( $\text{C}_2\text{D}_2\text{Cl}_4$ , 151 MHz) spectra of  $\text{Tp}^6\text{T}^6$ .

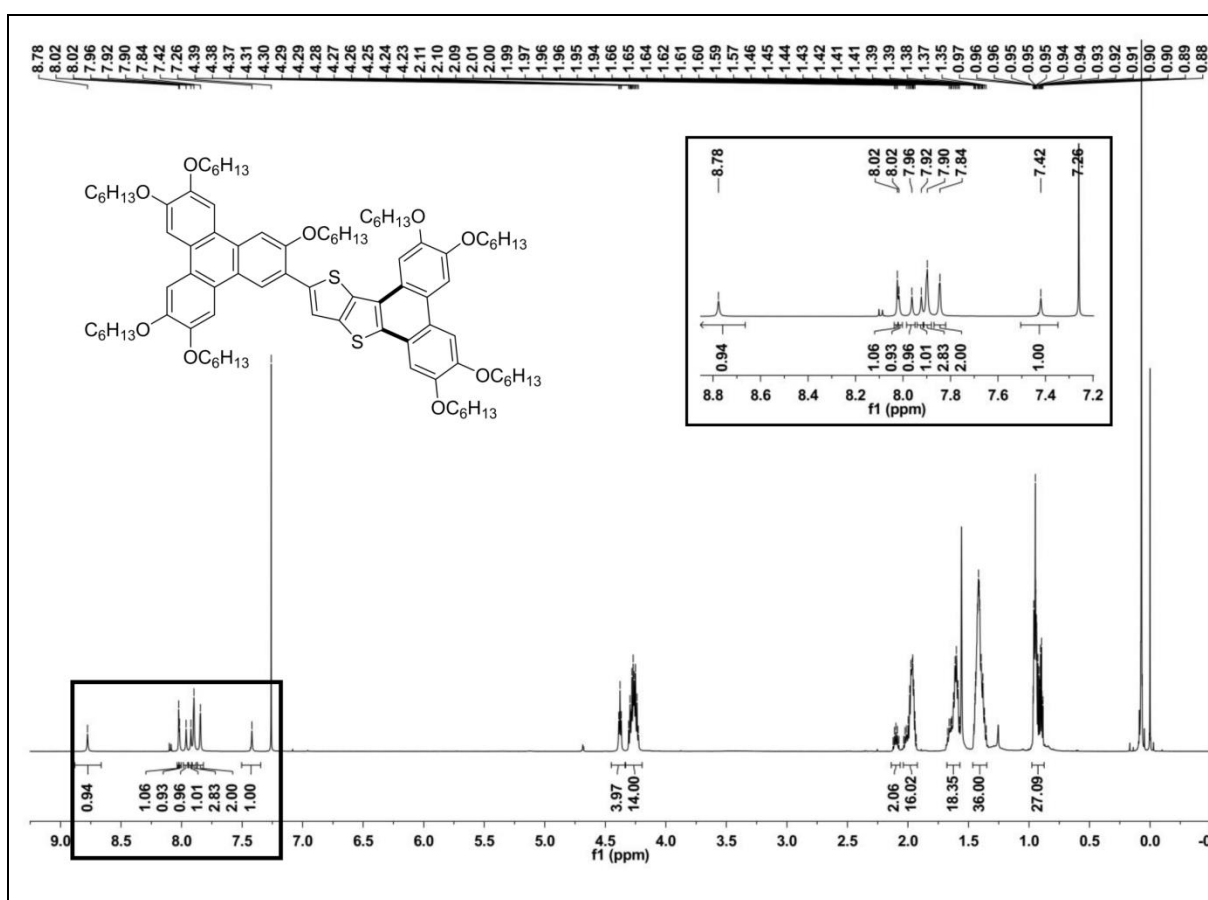

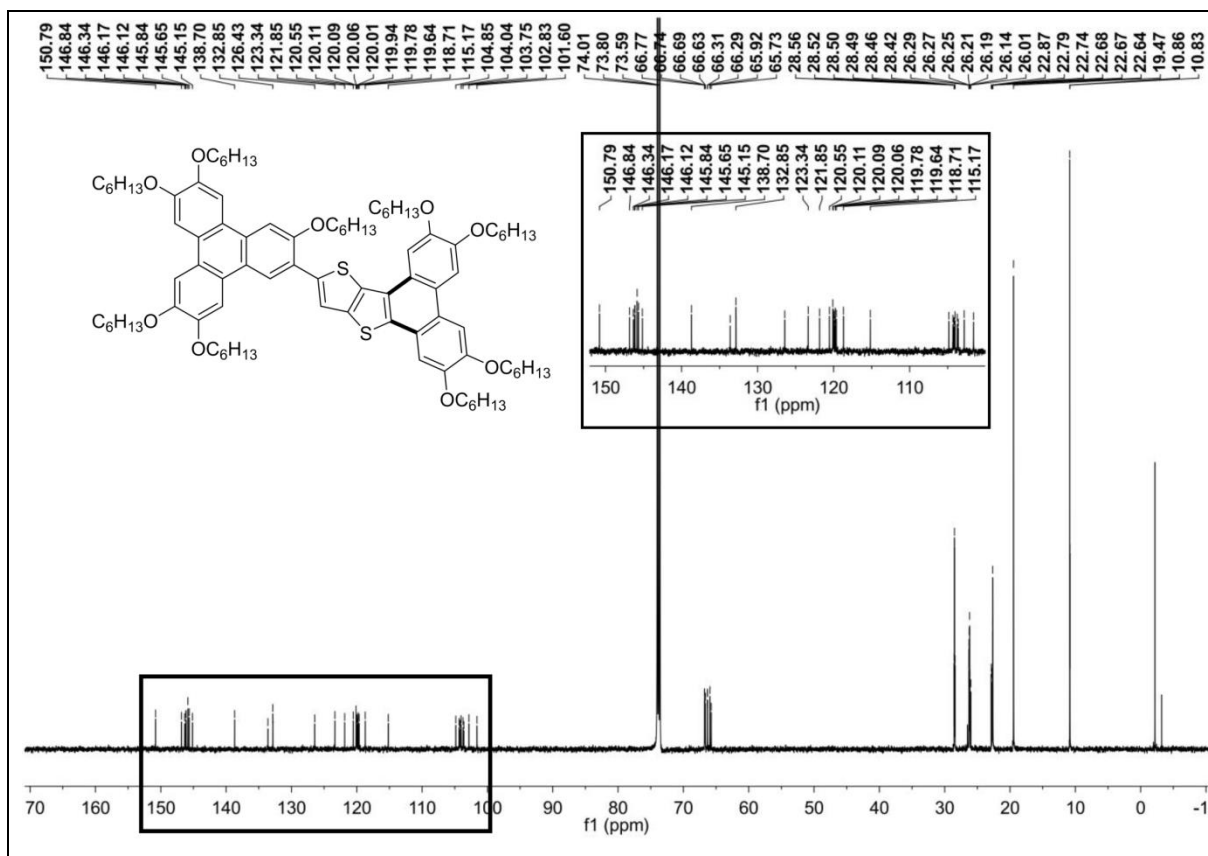

**Figure S16.** <sup>1</sup>H NMR (CDCl<sub>3</sub>, 600MHz) and <sup>13</sup>C NMR (CDCl<sub>3</sub>, 151 MHz) spectra of **Tp<sup>6</sup>Dt<sup>6</sup>**.

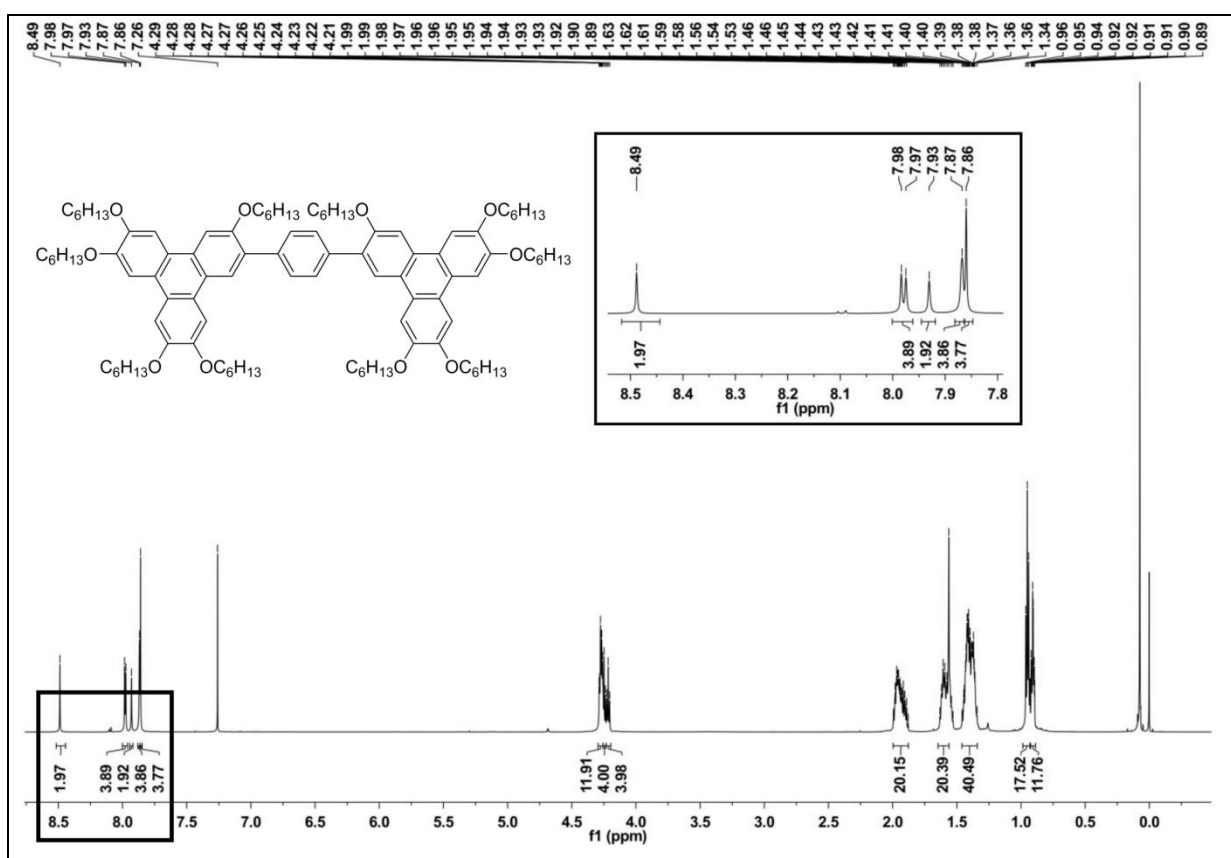



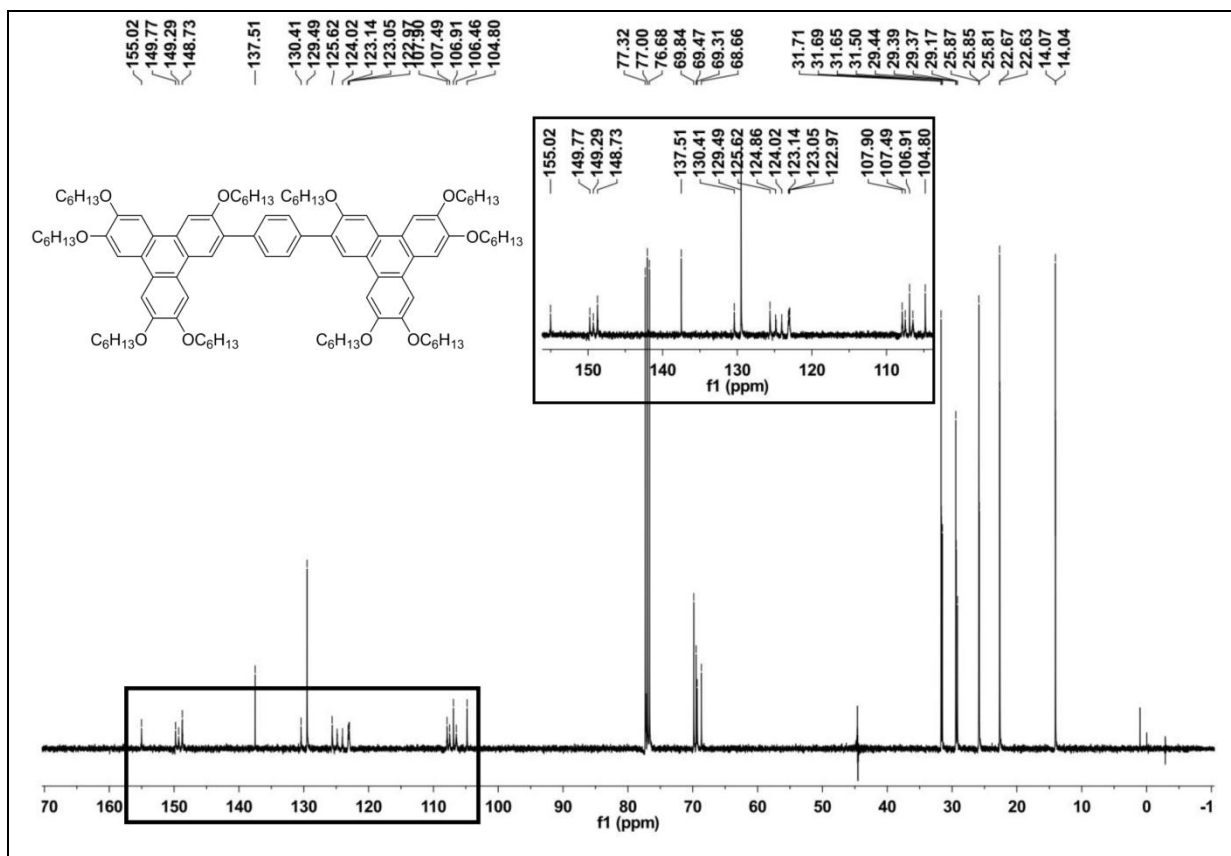

Figure S17. <sup>1</sup>H NMR (CDCl<sub>3</sub>, 600MHz) and <sup>13</sup>C NMR (CDCl<sub>3</sub>, 100 MHz) spectra of  $\text{Tp}^6\text{Ph}^6$ .

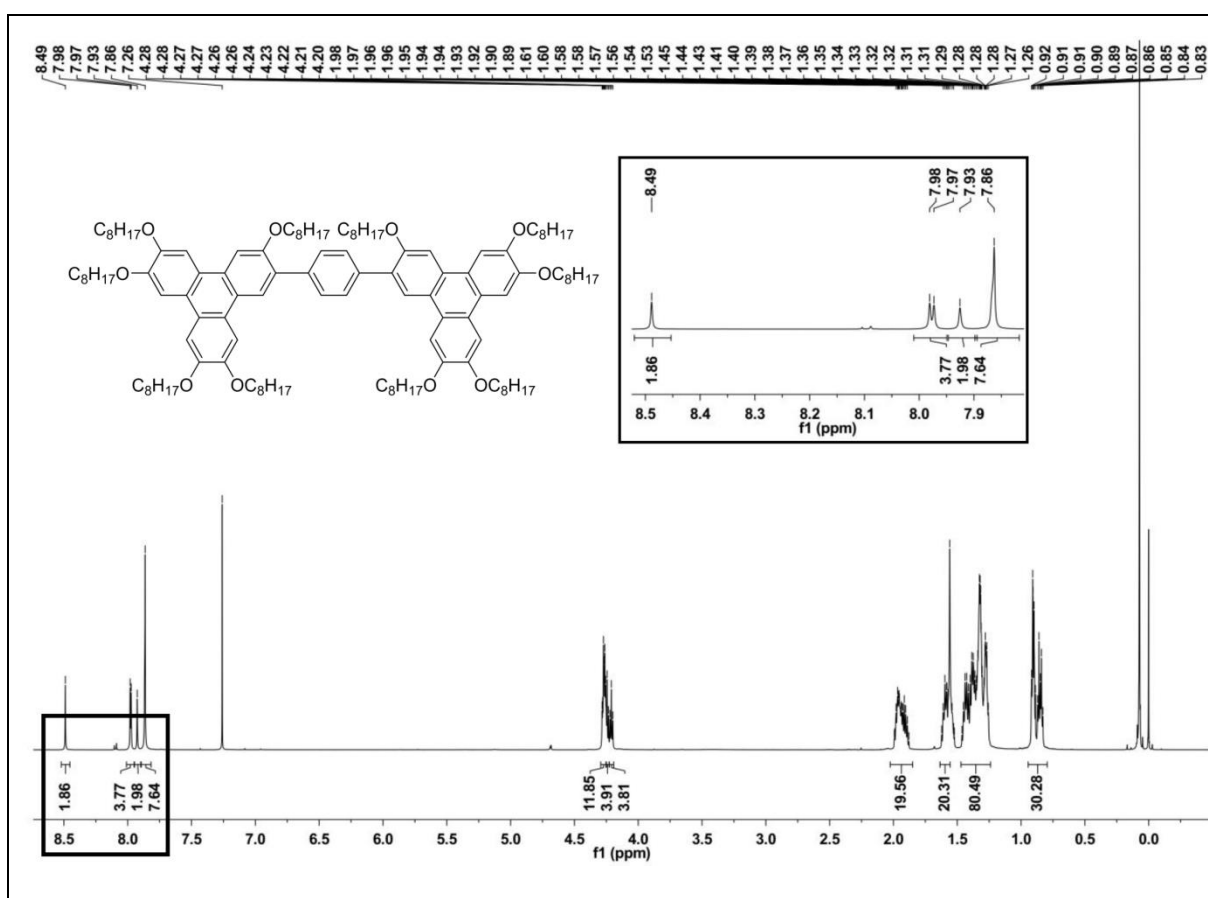

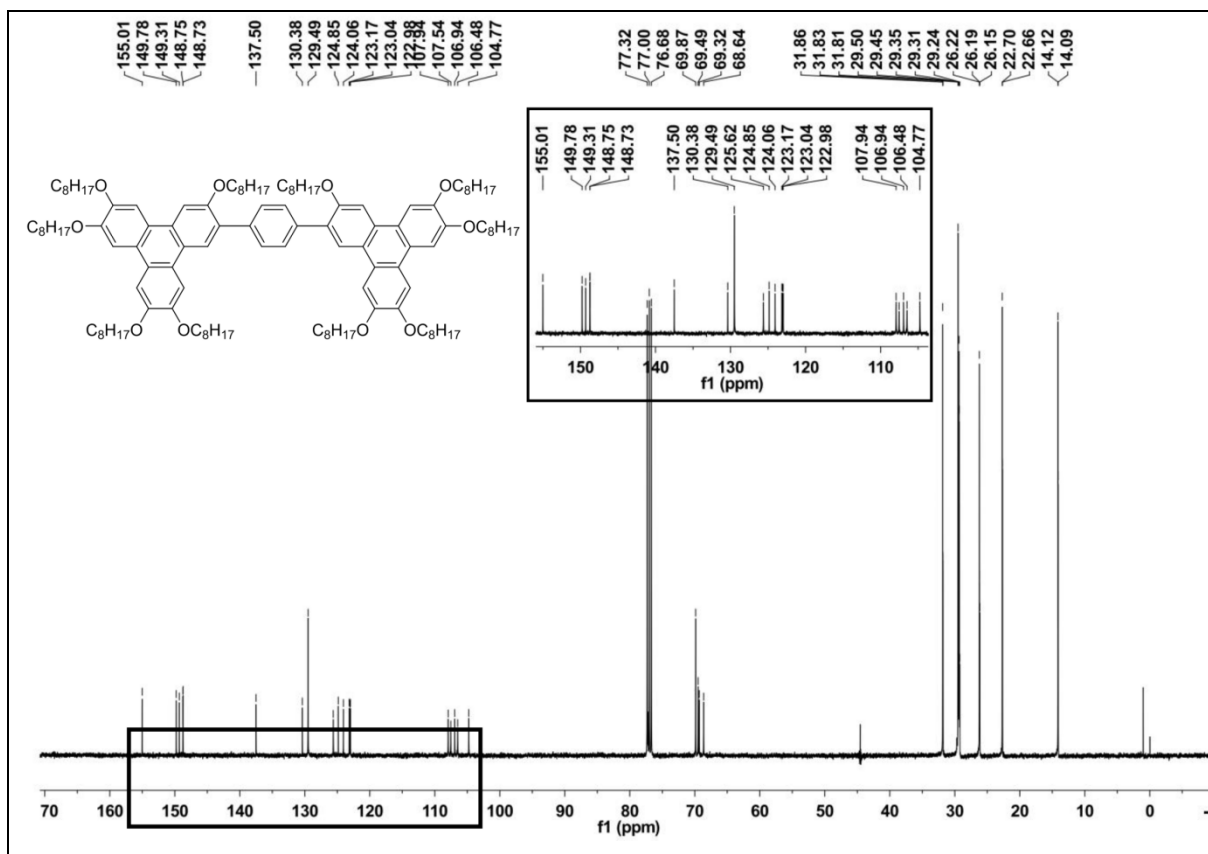

Figure S18.  $^1\text{H}$  NMR ( $\text{CDCl}_3$ , 600MHz) and  $^{13}\text{C}$  NMR ( $\text{CDCl}_3$ , 100 MHz) spectra of  $\text{Tp}^8\text{PhTp}^8$ .

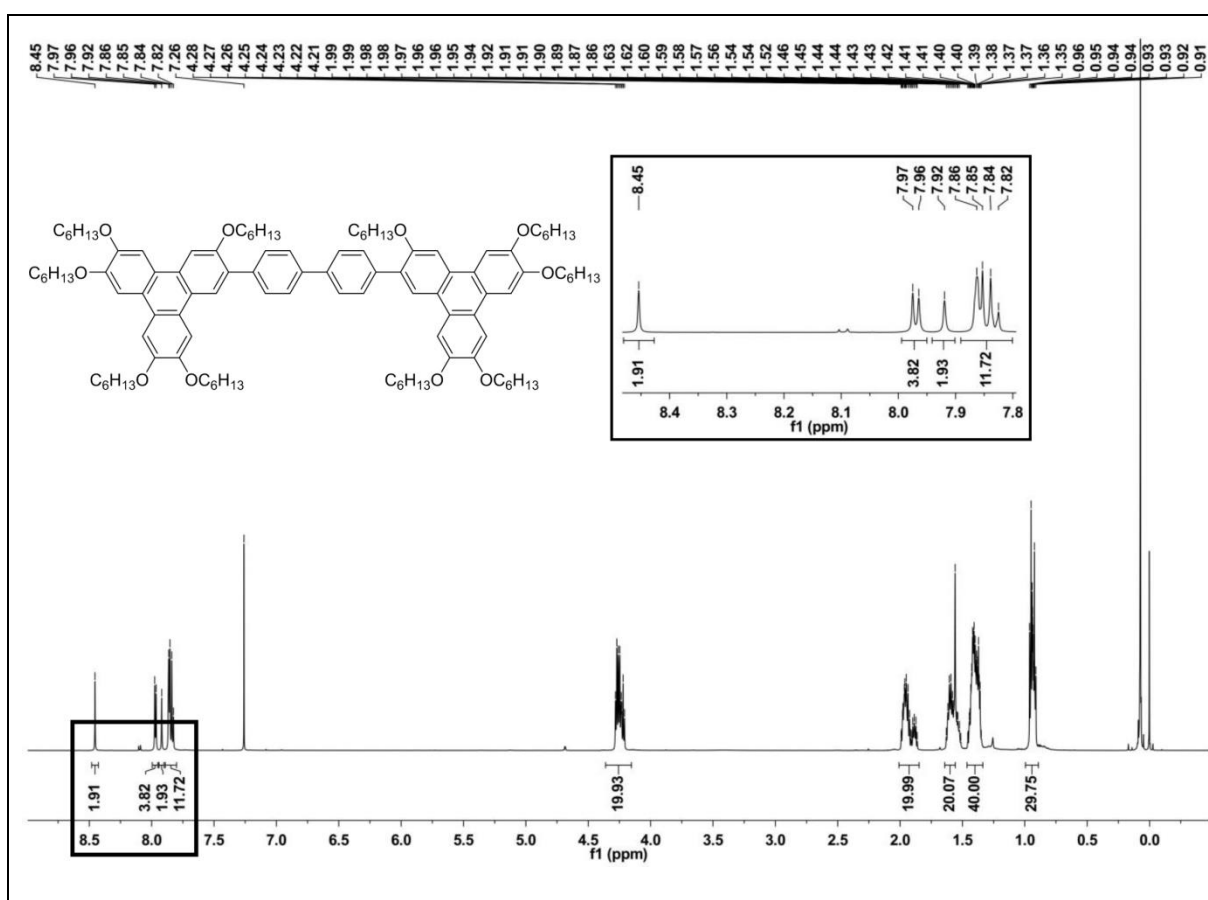

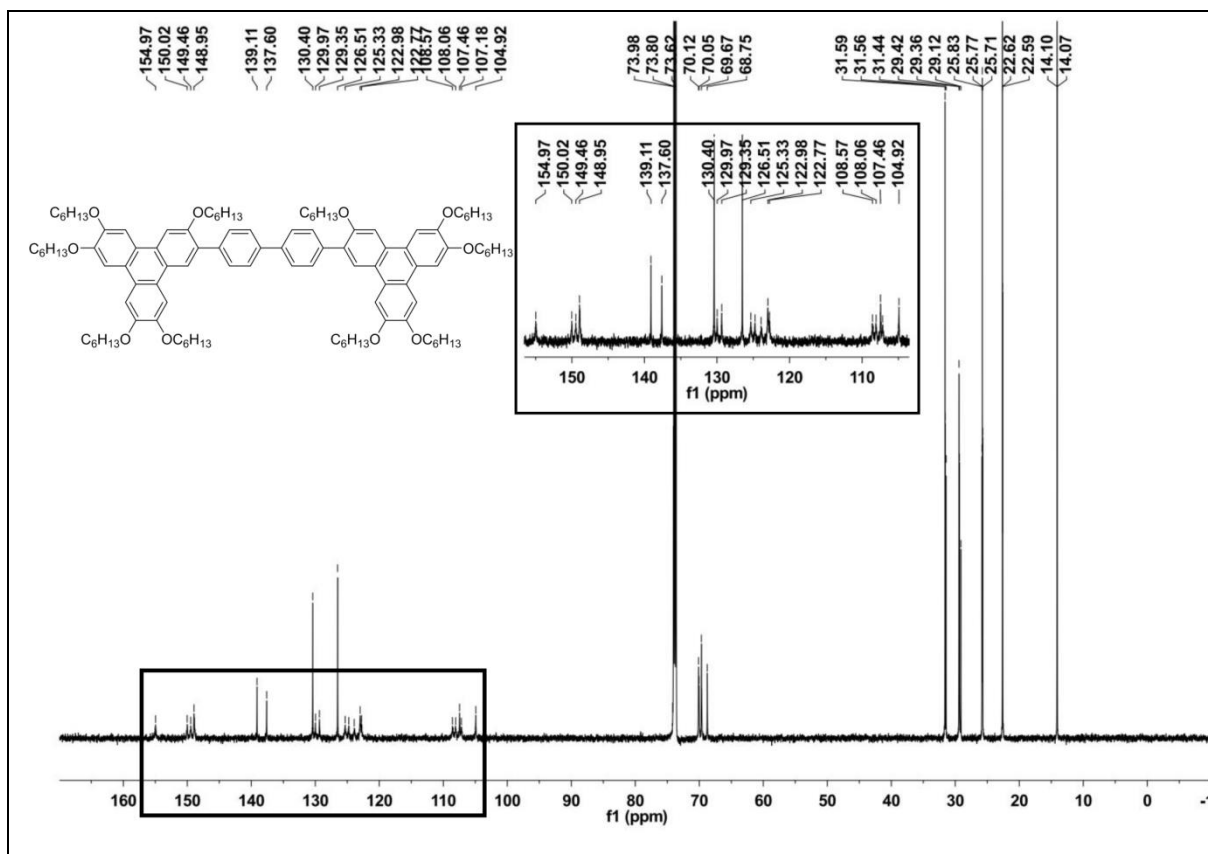

Figure S19. <sup>1</sup>H NMR (CDCl<sub>3</sub>, 600MHz) and <sup>13</sup>C NMR (C<sub>2</sub>D<sub>2</sub>Cl<sub>4</sub>, 151 MHz) spectra of Tp<sup>6</sup>Ph<sub>2</sub>Tp<sup>6</sup>.

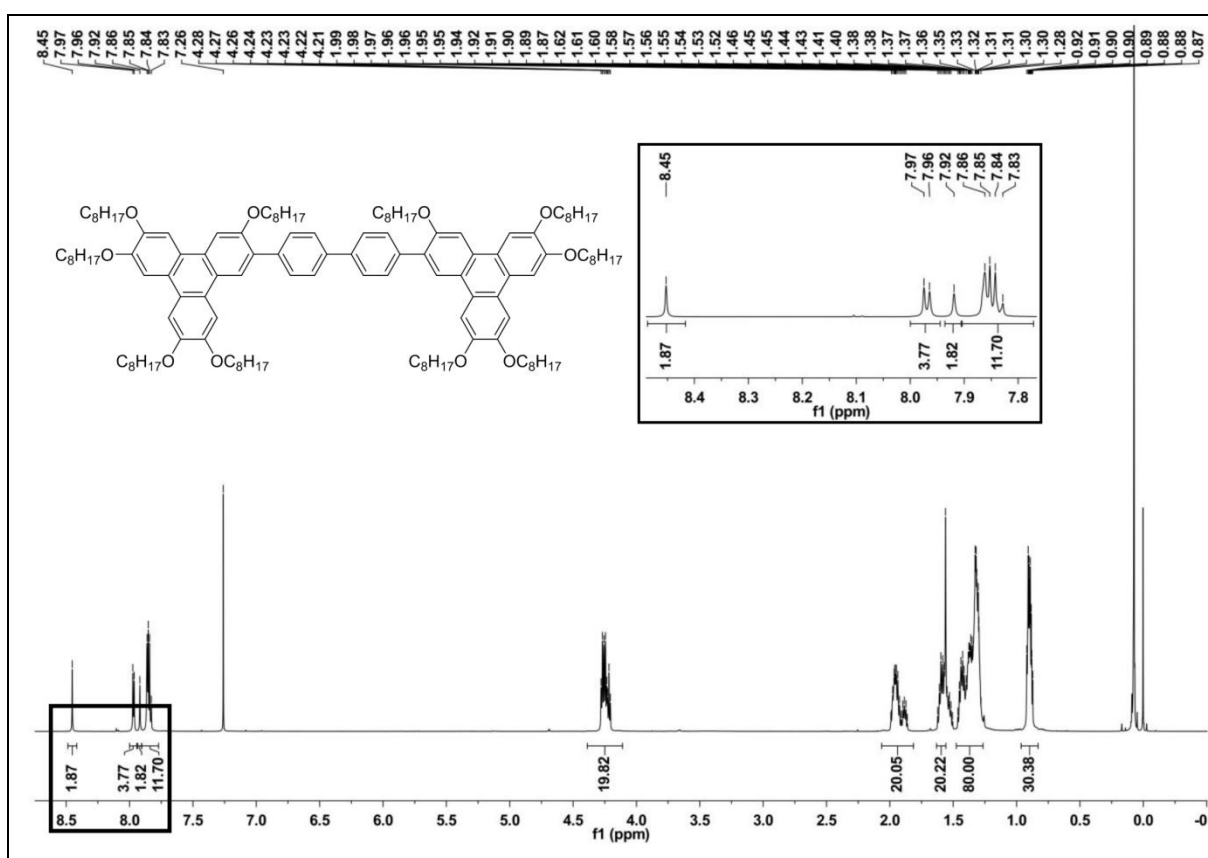

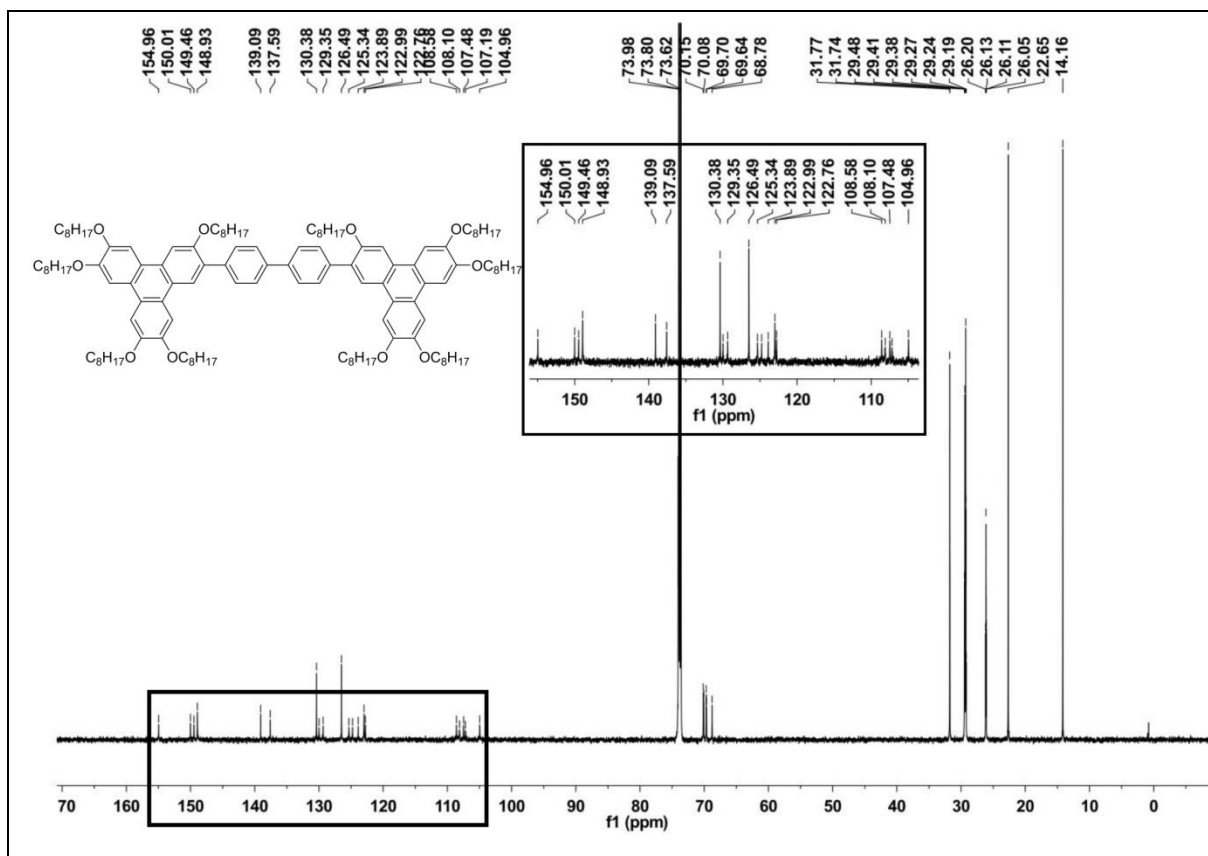

Figure S20. <sup>1</sup>H NMR (CDCl<sub>3</sub>, 600MHz) and <sup>13</sup>C NMR (C<sub>2</sub>D<sub>2</sub>Cl<sub>4</sub>, 151 MHz) spectra of **Tp<sup>8</sup>Ph<sub>2</sub>Tp<sup>8</sup>**.

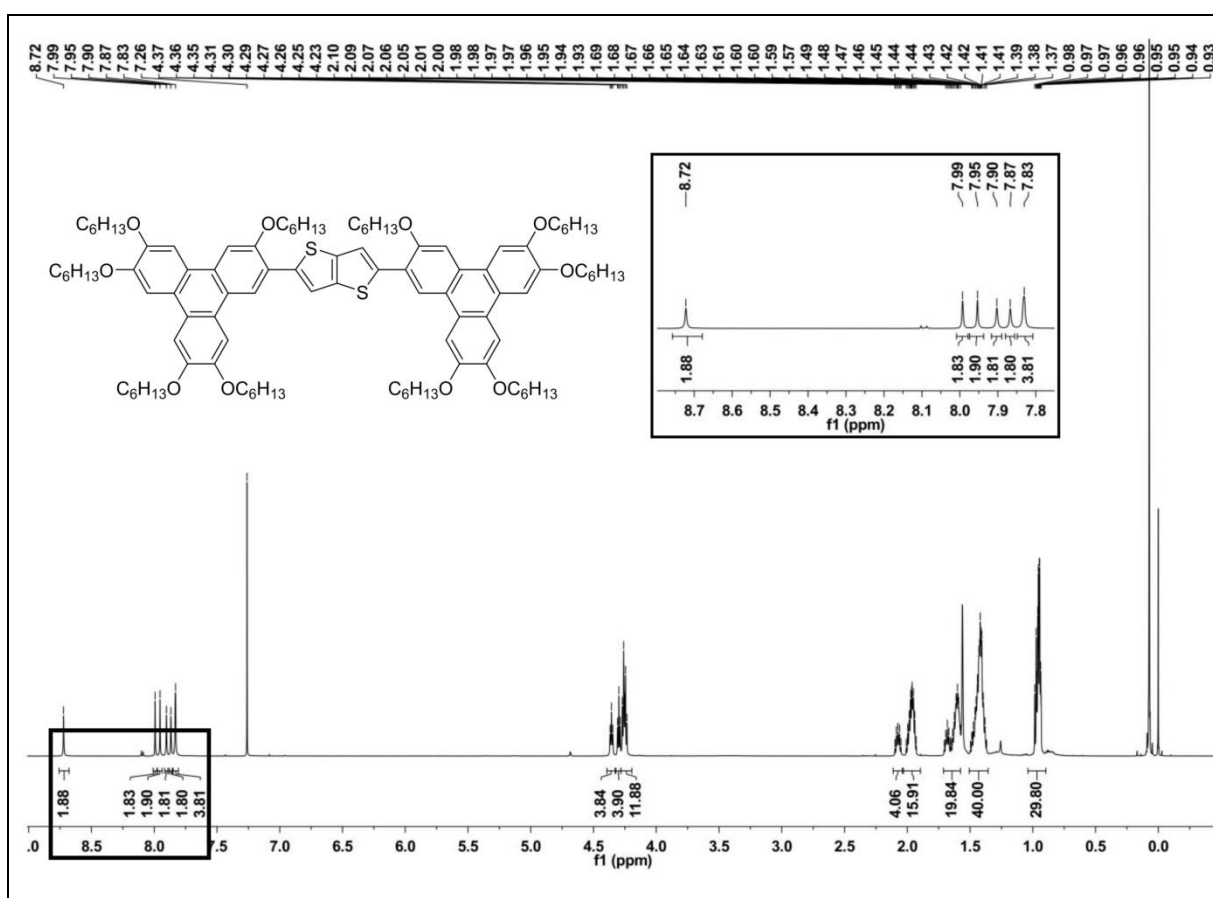

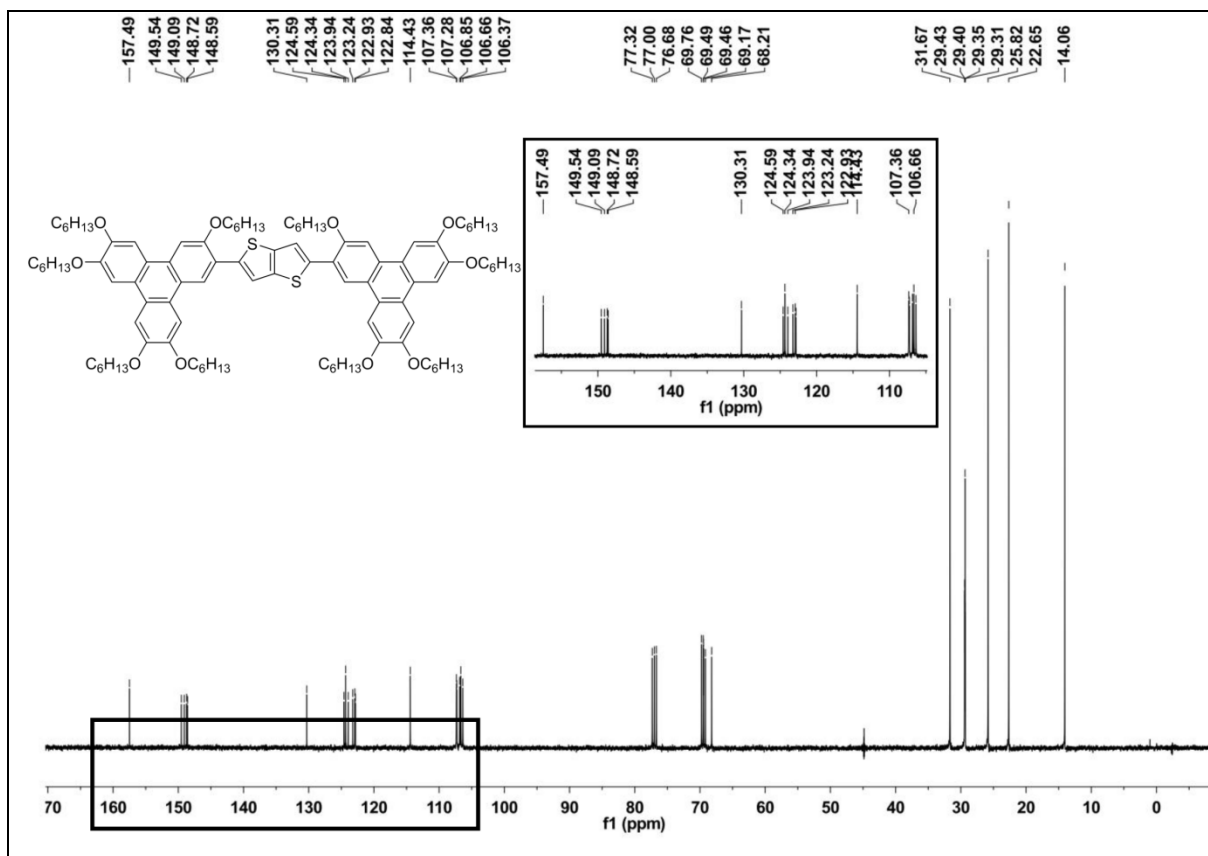

**Figure S21.**  $^1\text{H}$  NMR ( $\text{CDCl}_3$ , 600MHz) and  $^{13}\text{C}$  NMR ( $\text{CDCl}_3$ , 100 MHz) spectra of  $\text{Tp}^6\text{TtTp}^6$ .

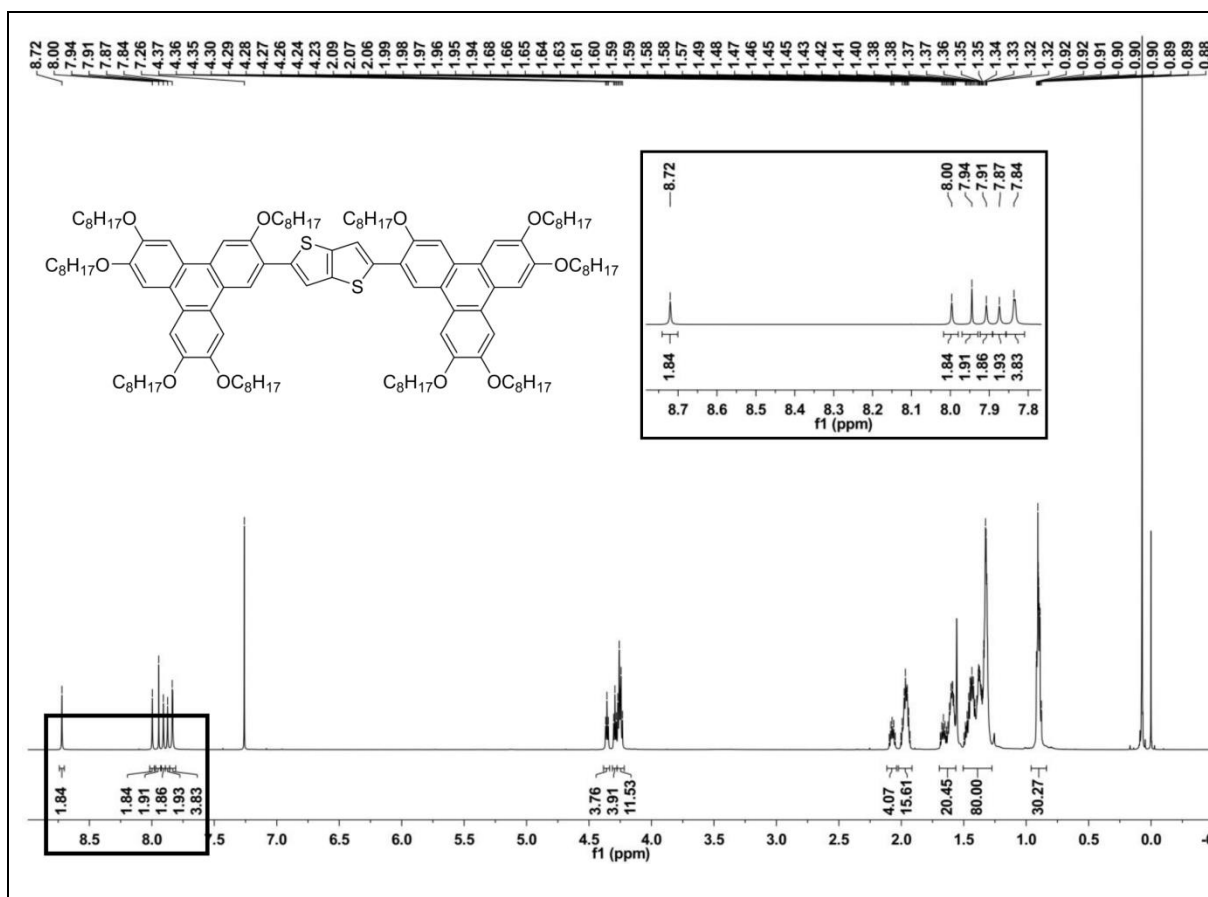

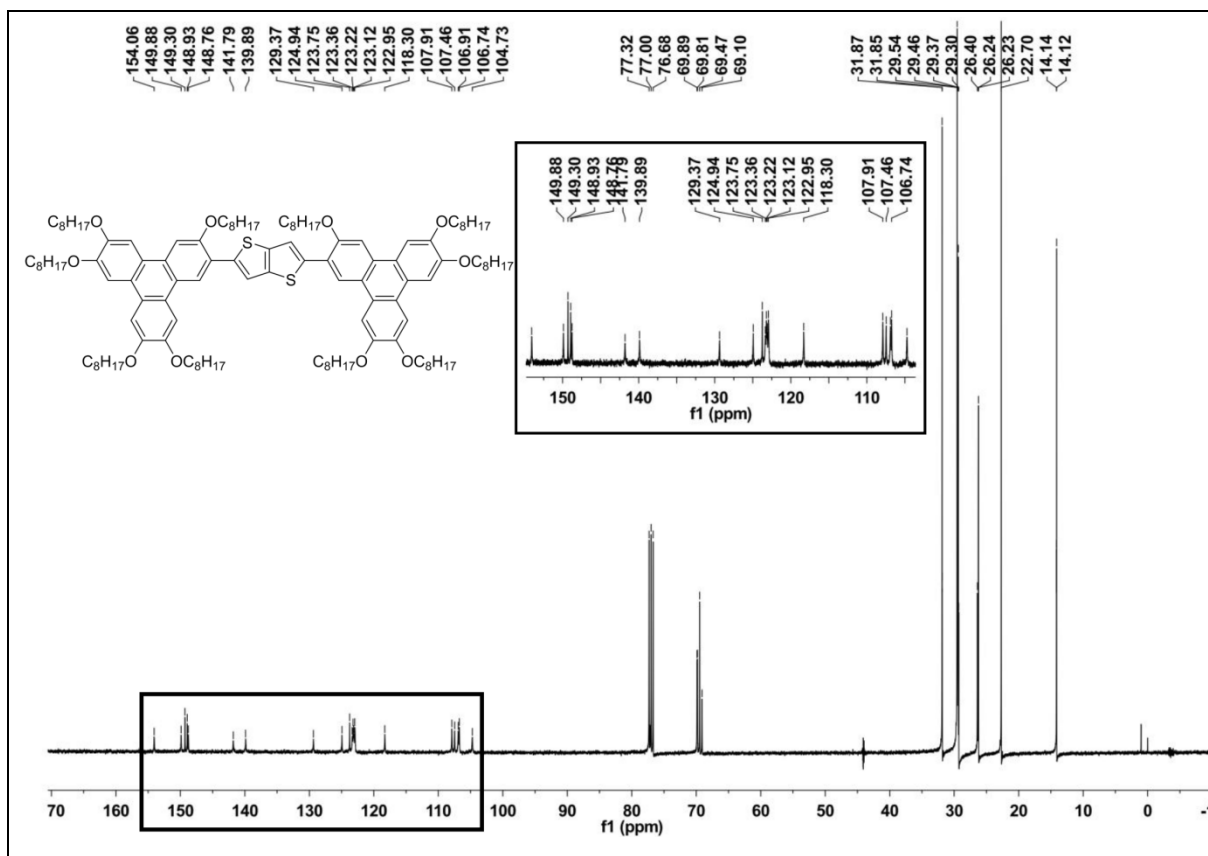

**Figure S22.** <sup>1</sup>H NMR (CDCl<sub>3</sub>, 600MHz) and <sup>13</sup>C NMR (CDCl<sub>3</sub>, 100 MHz) spectra of **Tp<sup>8</sup>TtP<sup>8</sup>**.

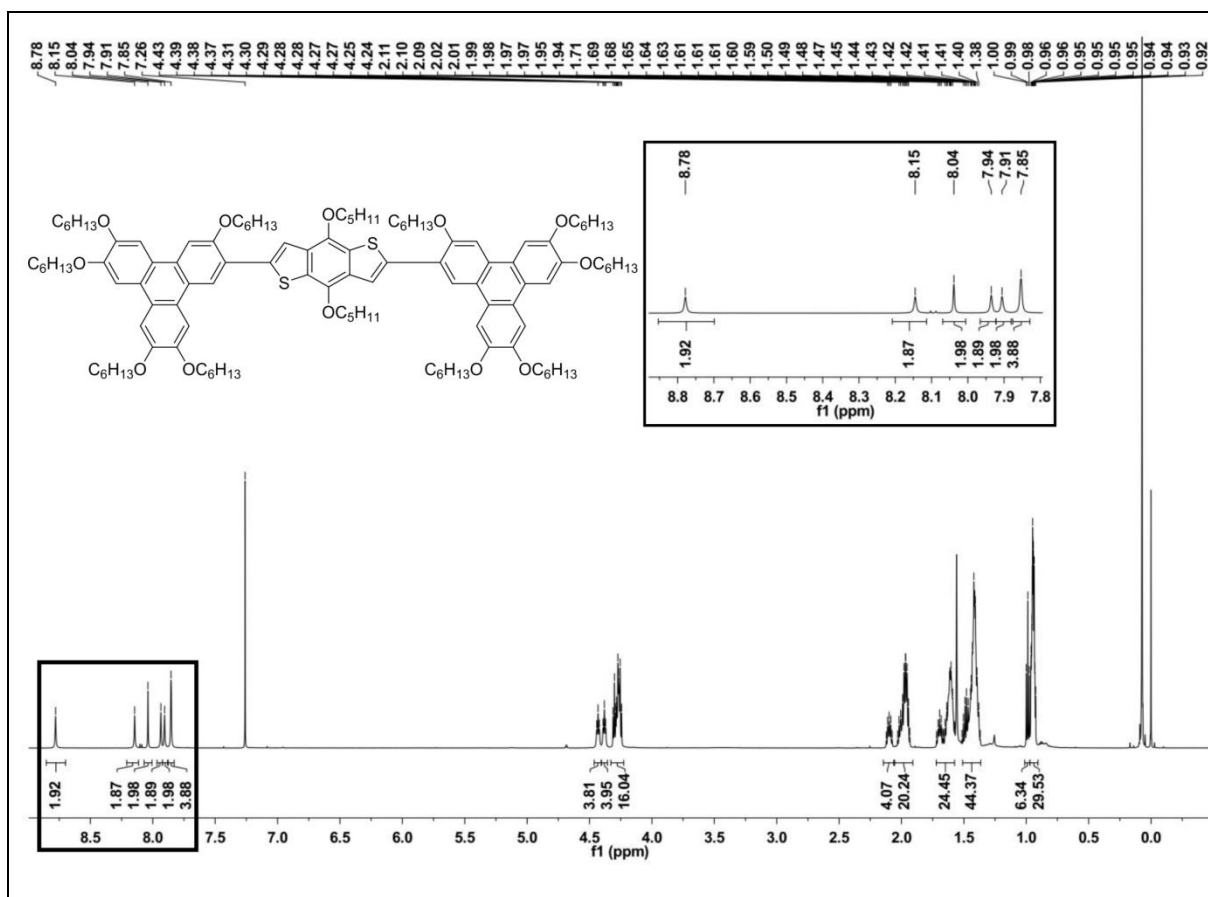

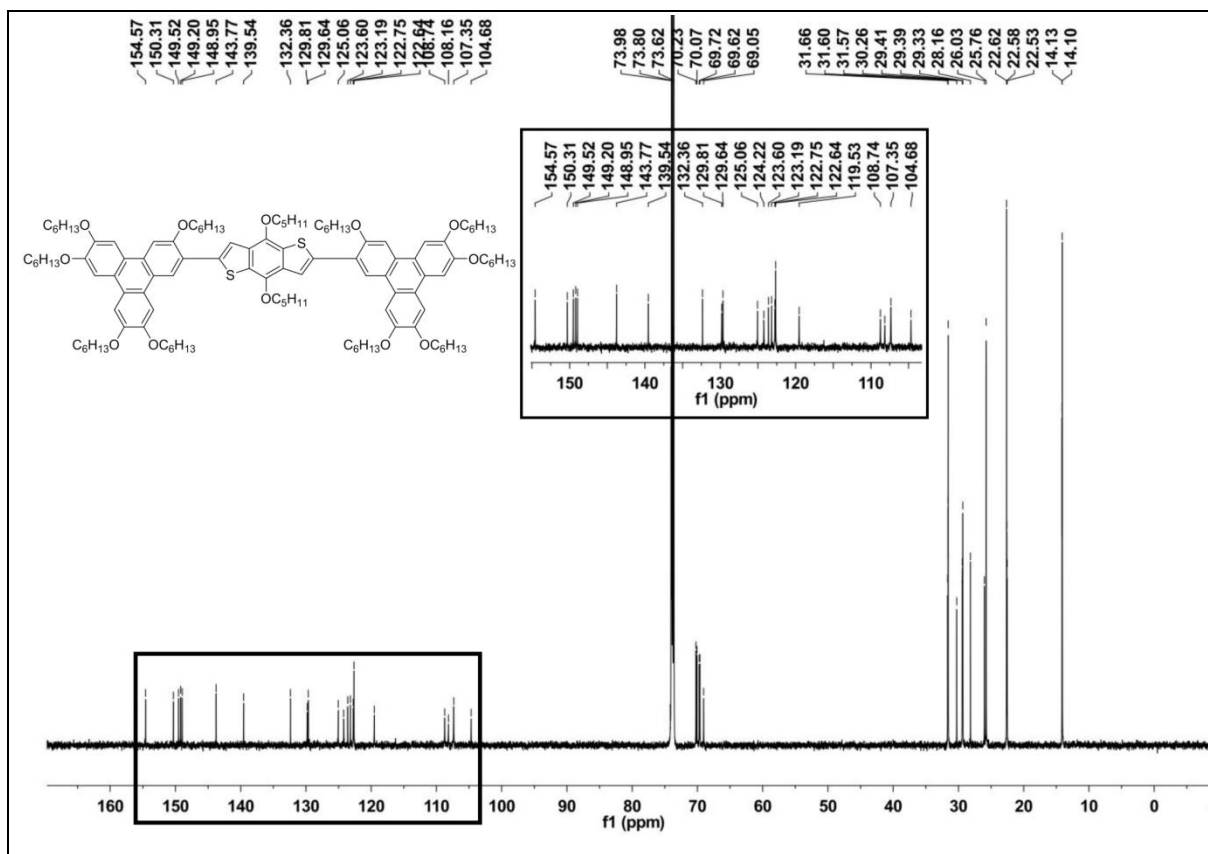

Figure S23.  $^1\text{H}$  NMR (CDCl<sub>3</sub>, 600MHz) and  $^{13}\text{C}$  NMR (C<sub>2</sub>D<sub>2</sub>Cl<sub>4</sub>, 151 MHz) spectra of  $\text{Tp}^6\text{BtTp}^6$ .

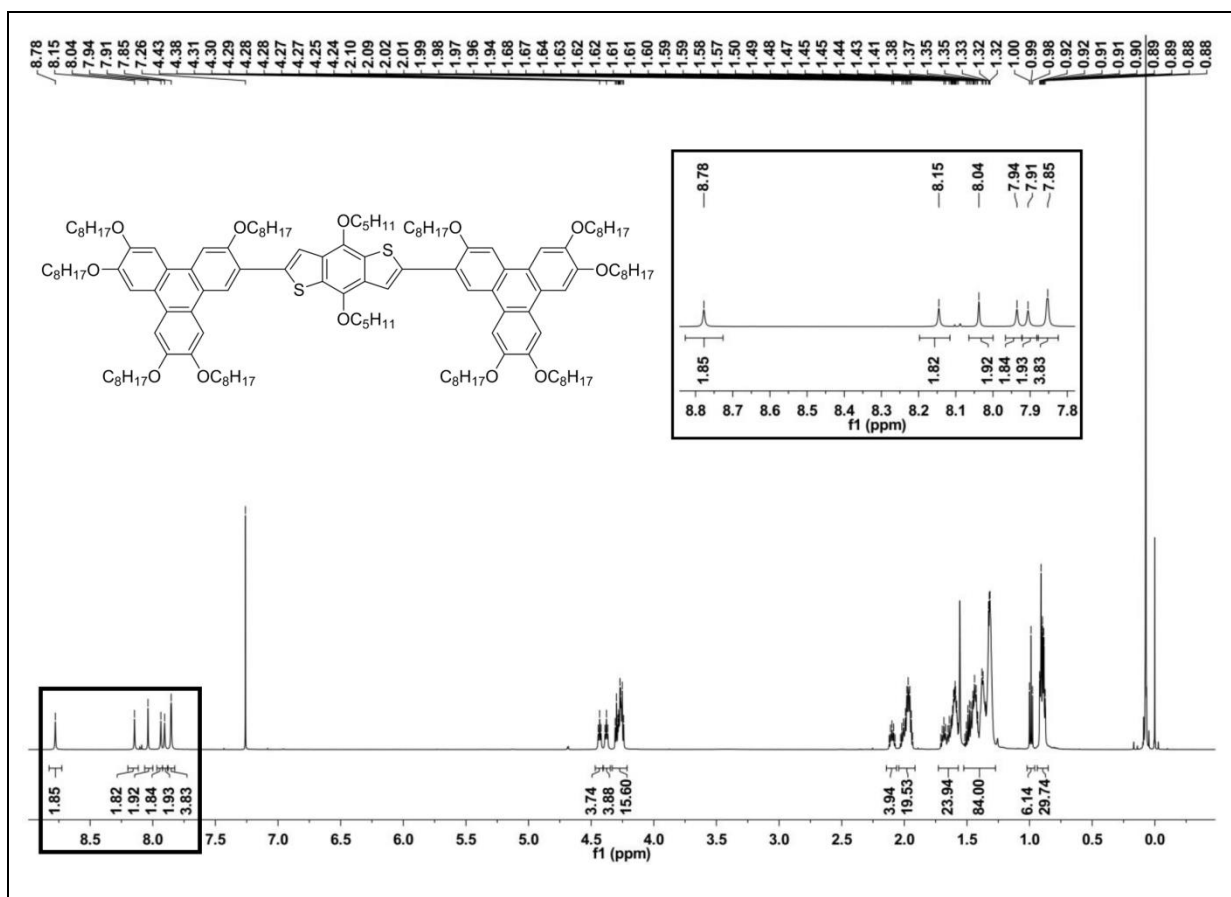

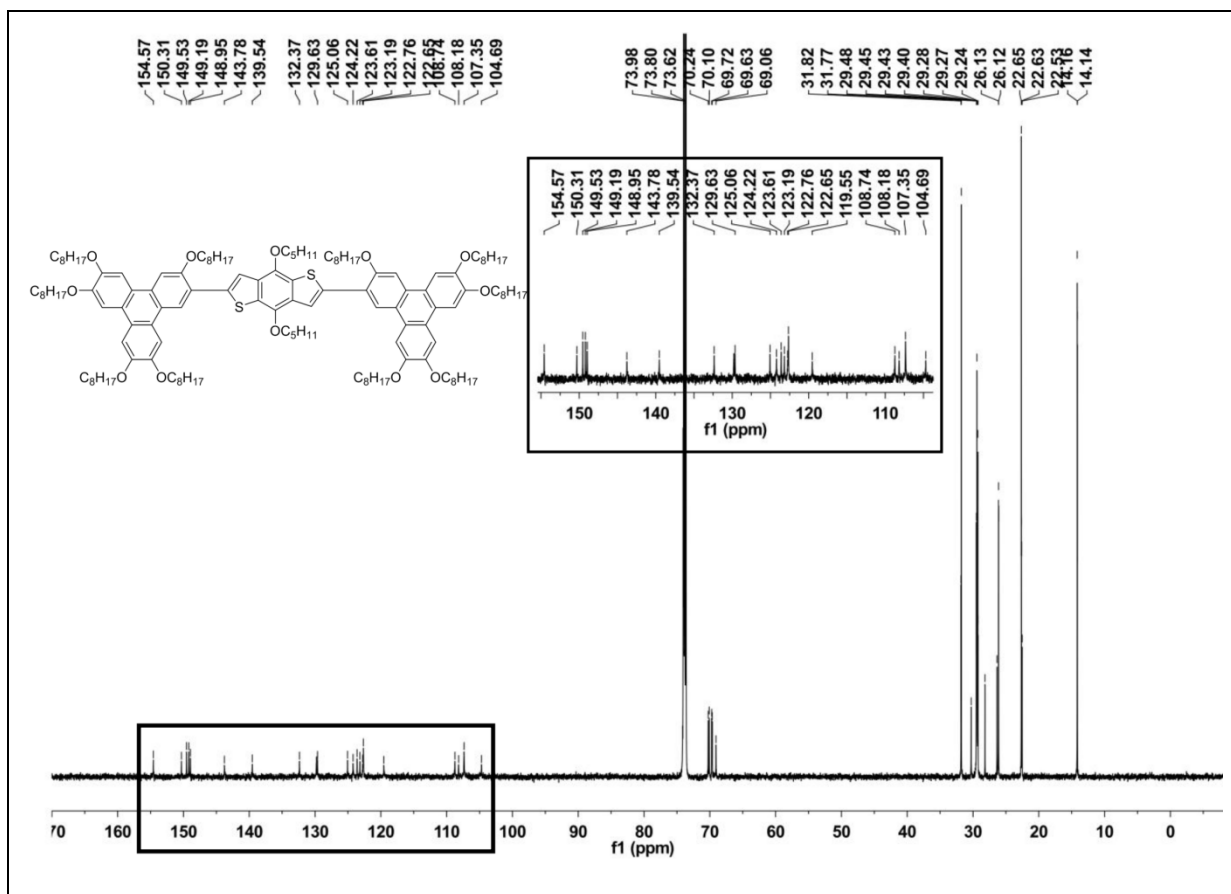

Figure S24.  $^1\text{H}$  NMR ( $\text{CDCl}_3$ , 600MHz) and  $^{13}\text{C}$  NMR ( $\text{C}_2\text{D}_2\text{Cl}_4$ , 151 MHz) spectra of  $\text{Tp}^8\text{TBTp}^8$ .

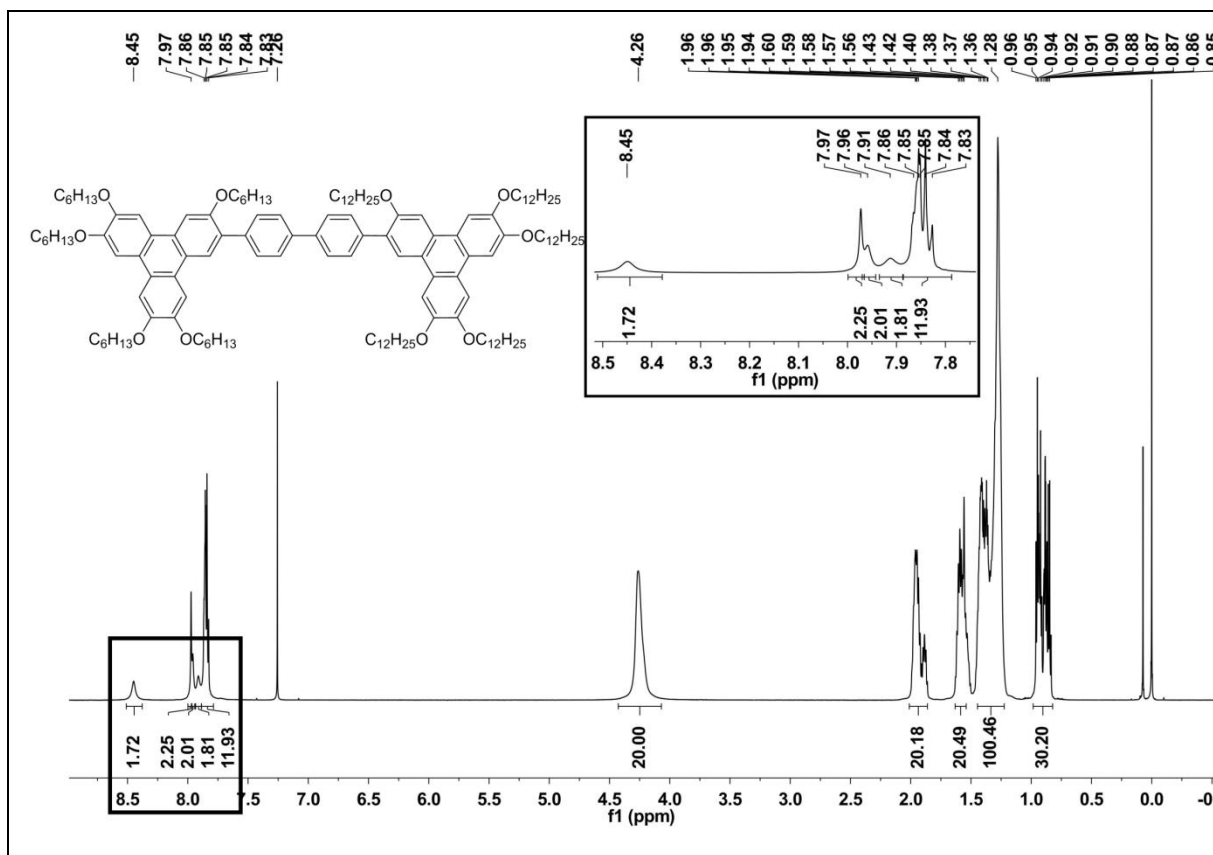



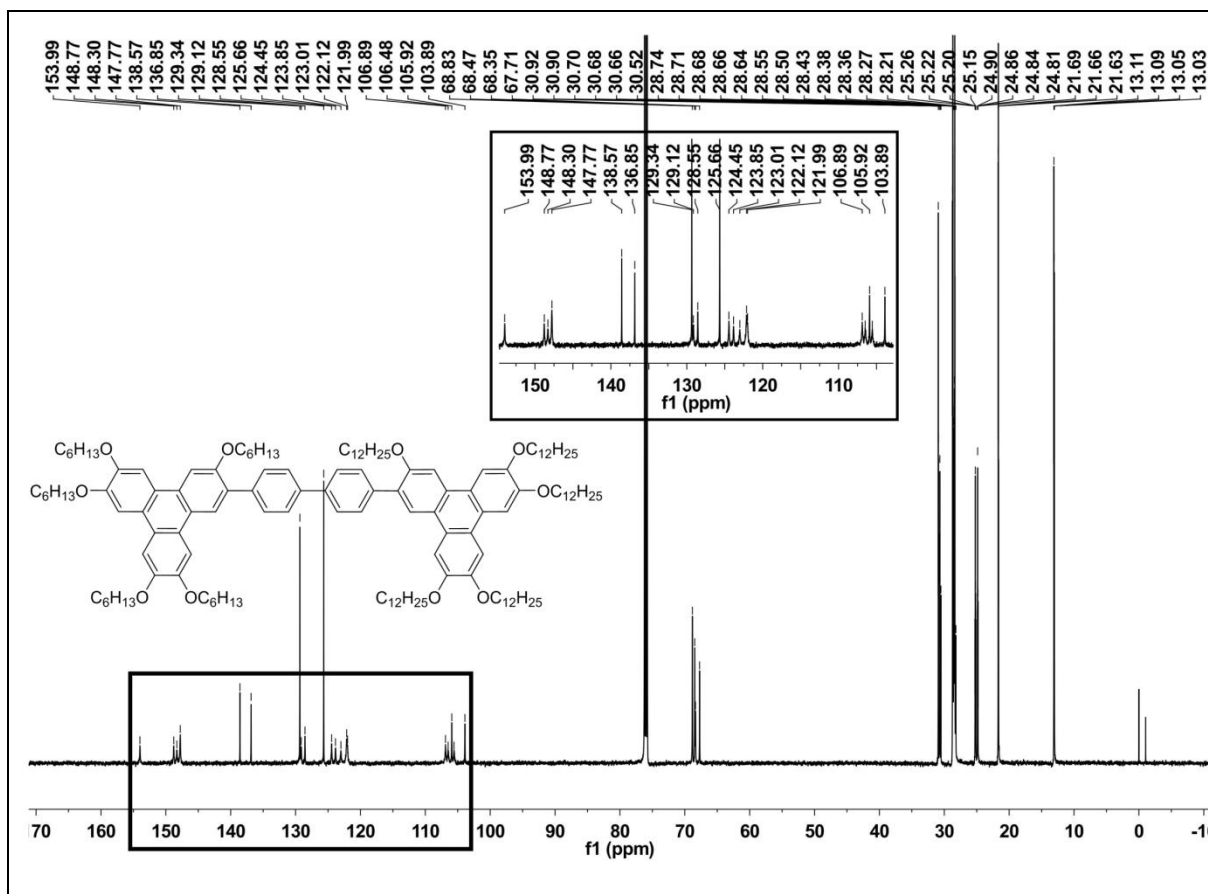

Figure S25.  $^1\text{H}$  NMR (CDCl<sub>3</sub>, 600MHz) and  $^{13}\text{C}$  NMR (CDCl<sub>3</sub>, 151 MHz) spectra of  $\text{Tp}^6\text{Ph}_2\text{Tp}^{12}$ .

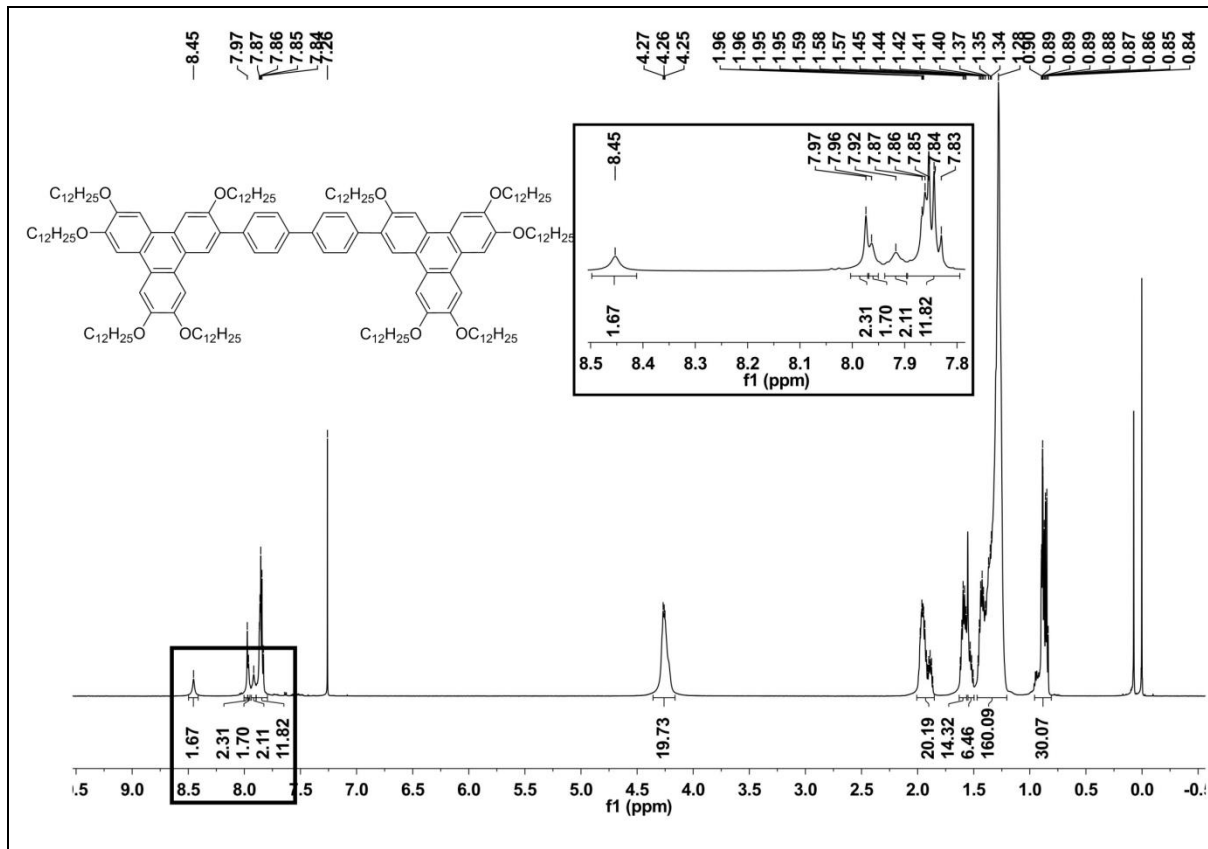

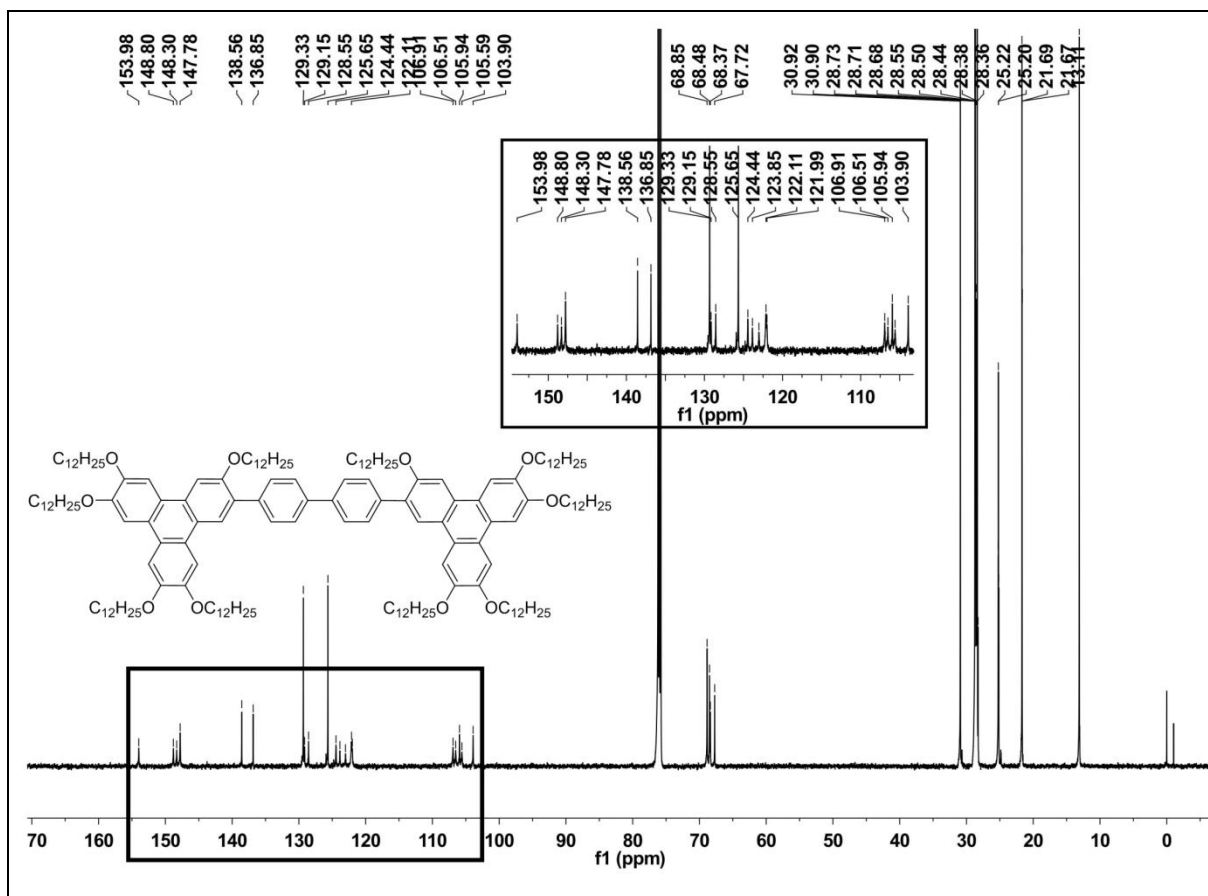

Figure S26. <sup>1</sup>H NMR (CDCl<sub>3</sub>, 600MHz) and <sup>13</sup>C NMR (CDCl<sub>3</sub>, 151 MHz) spectra of Tp<sup>12</sup>Ph<sub>2</sub>Tp<sup>12</sup>.

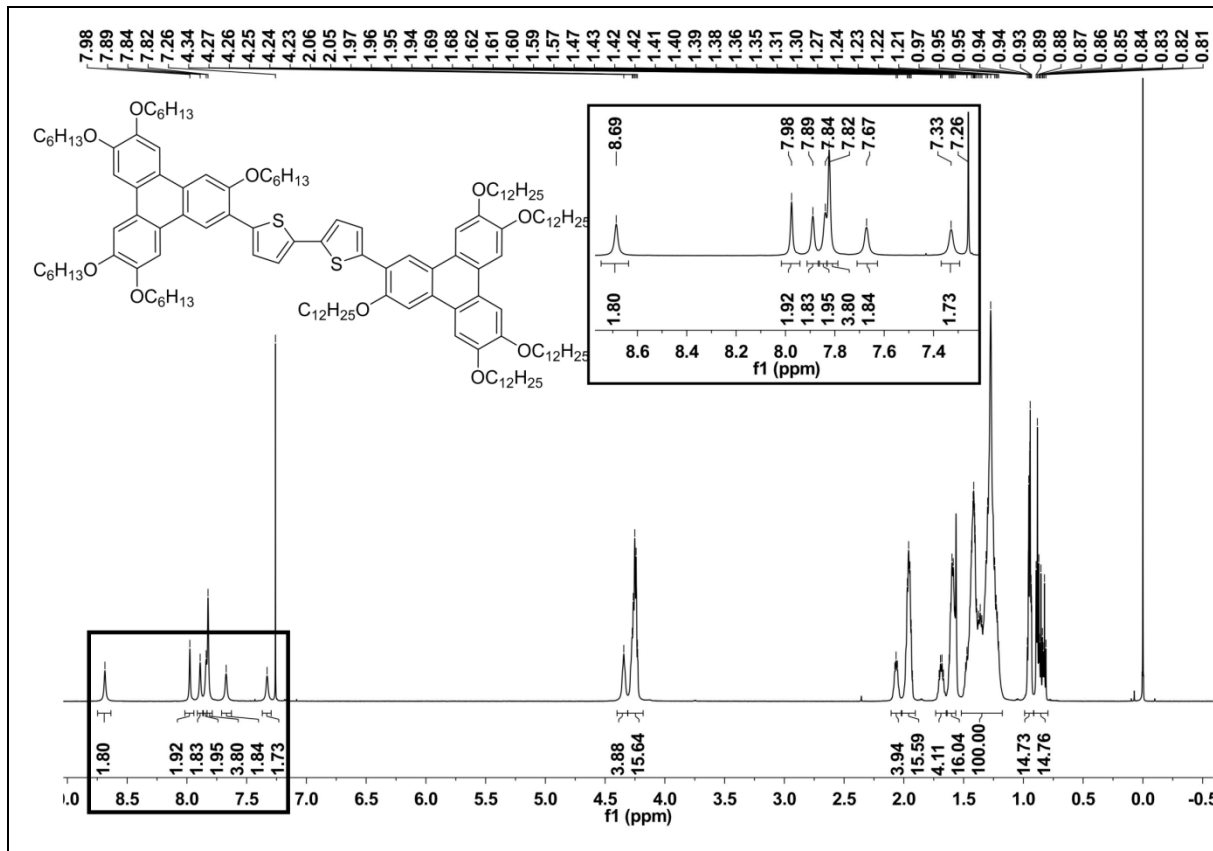

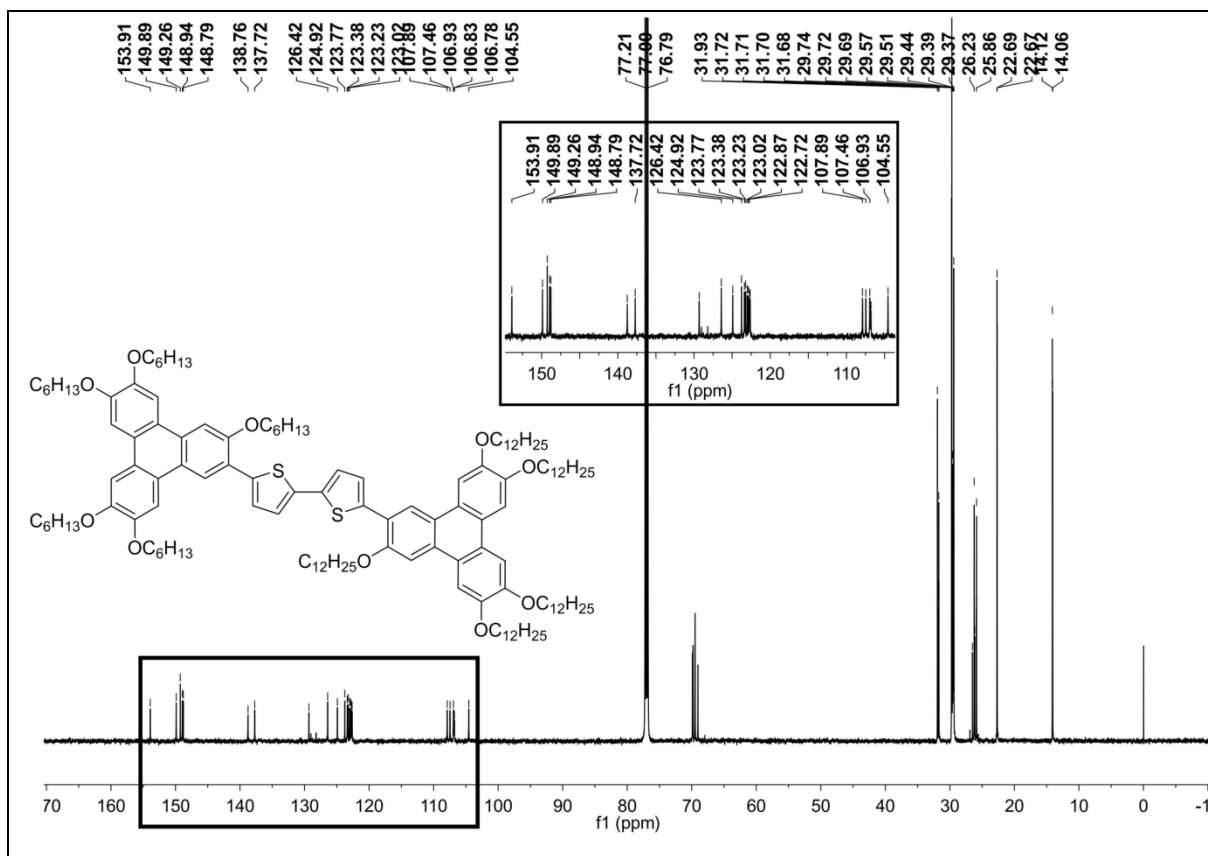

Figure S27.  $^1\text{H}$  NMR ( $\text{CDCl}_3$ , 600MHz) and  $^{13}\text{C}$  NMR ( $\text{CDCl}_3$ , 151 MHz) spectra of  $\text{Tp}^6\text{Th}_2\text{Tp}^{12}$ .

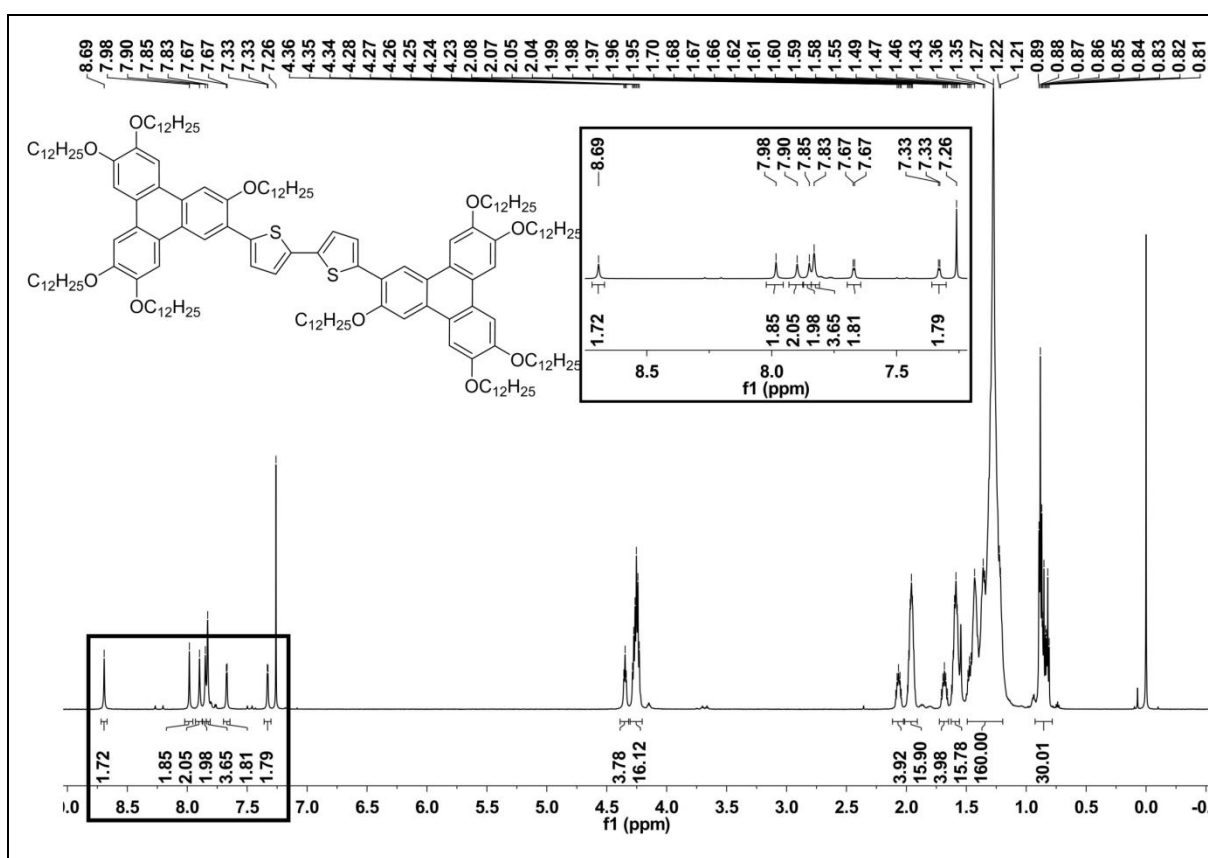

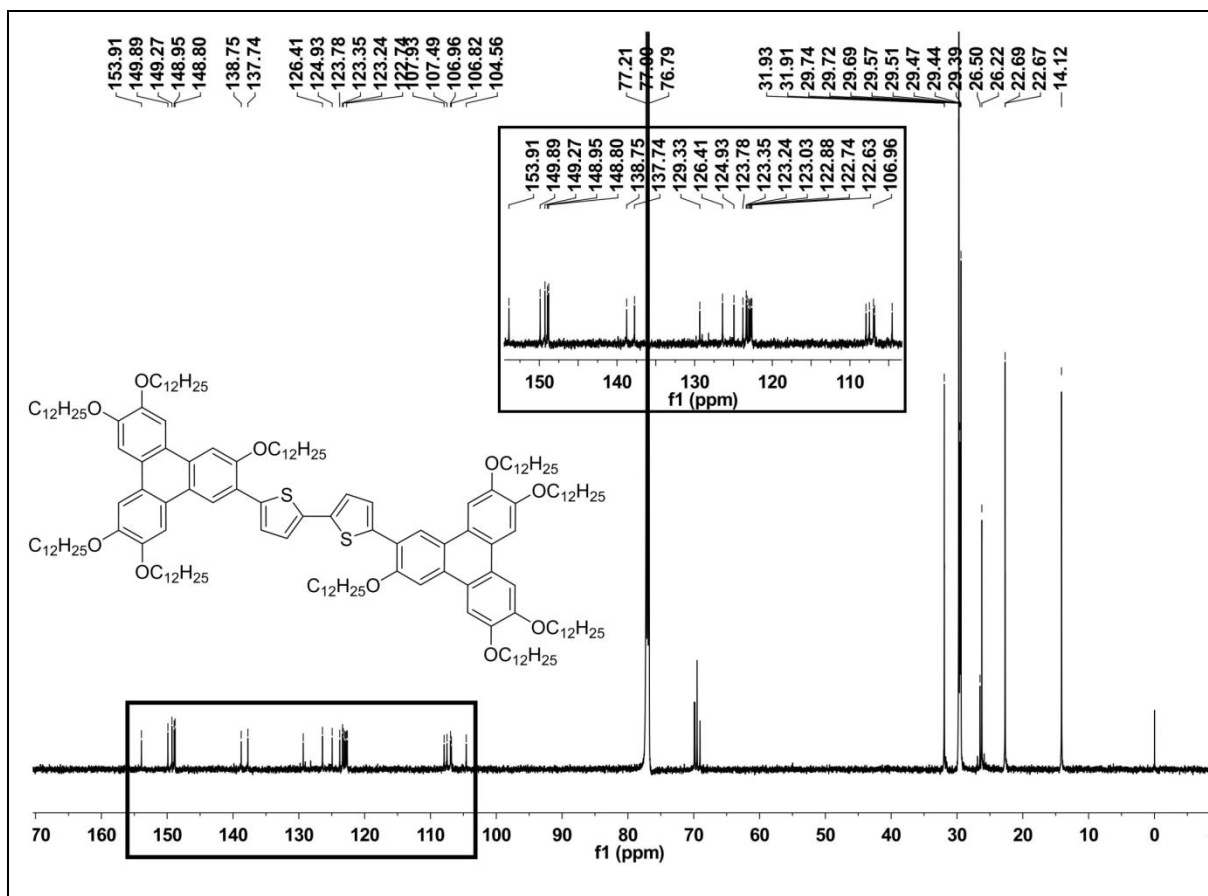

Figure S28.  $^1\text{H}$  NMR (CDCl<sub>3</sub>, 600MHz) and  $^{13}\text{C}$  NMR (CDCl<sub>3</sub>, 151 MHz) spectra of  $\text{Tp}^{12}\text{Th}_2\text{Tp}^{12}$ .

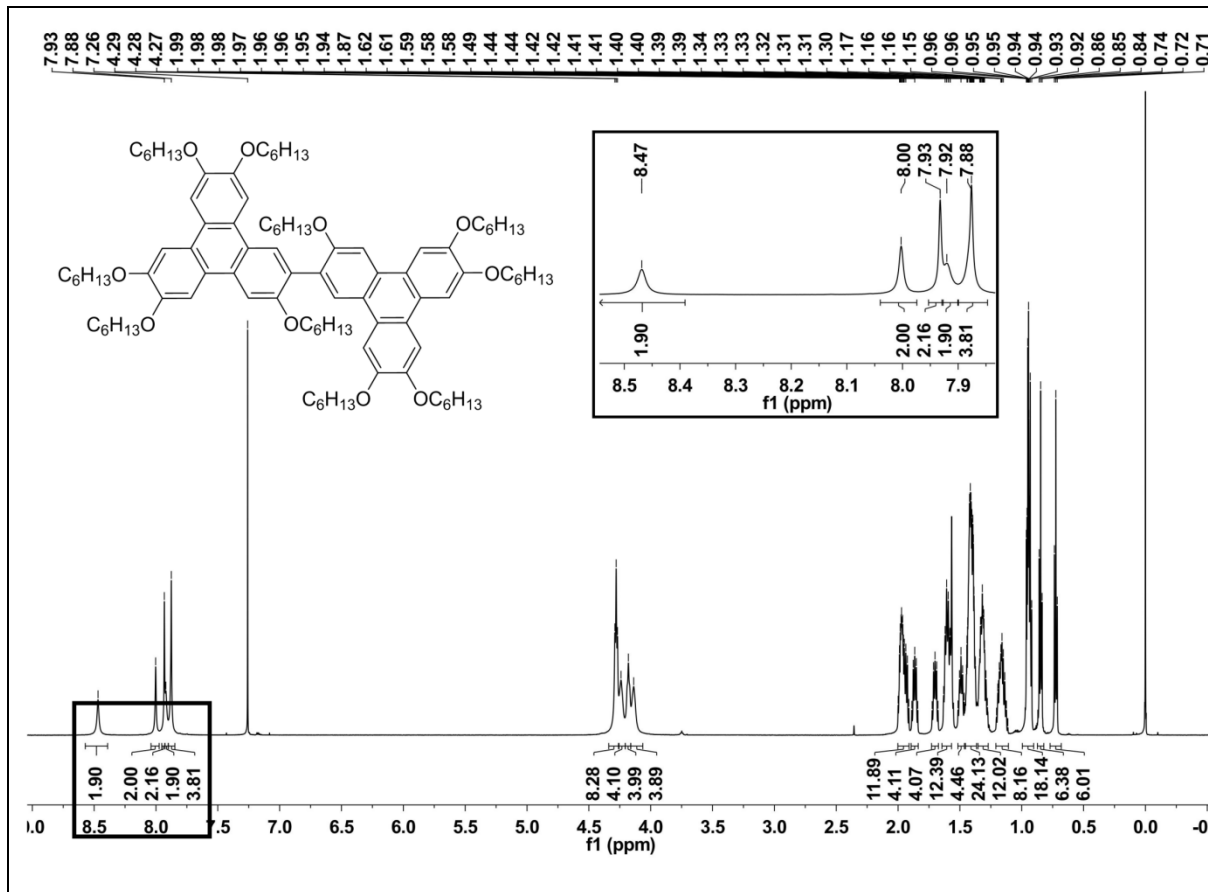

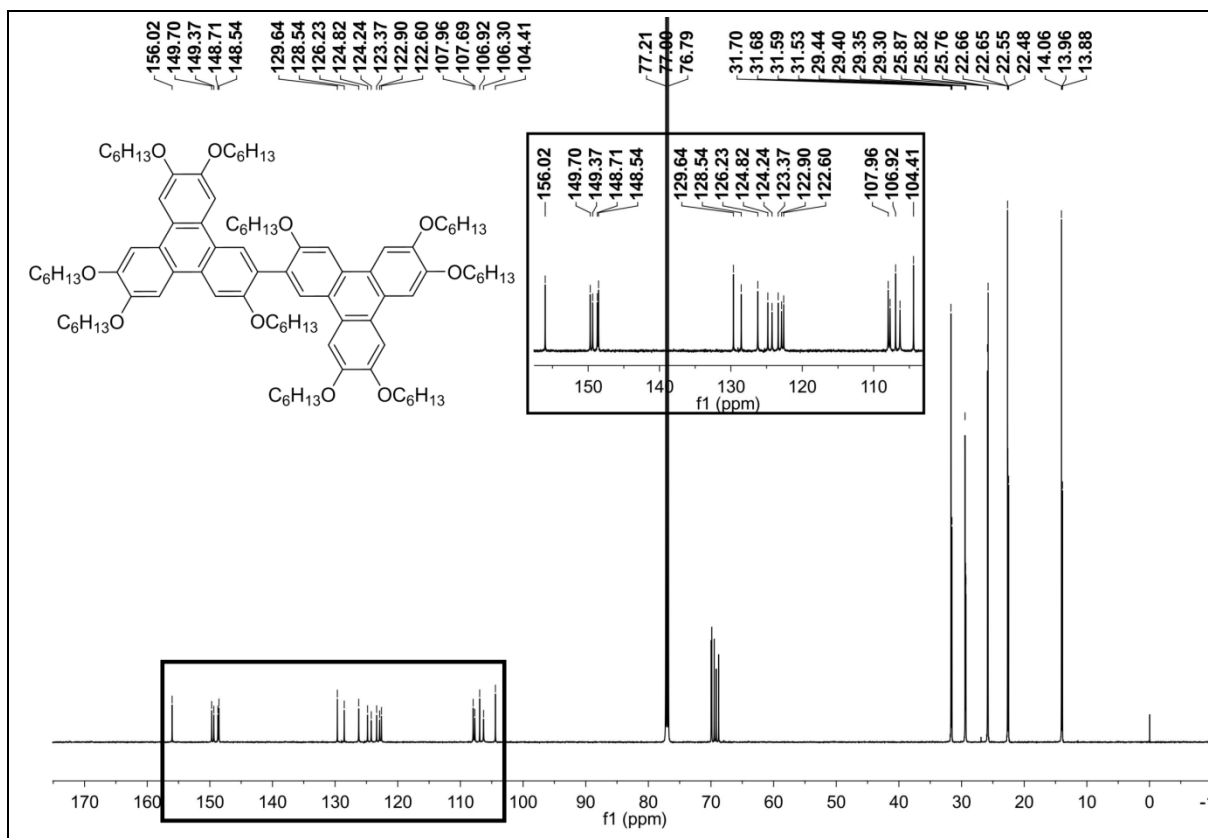

Figure S29.  $^1\text{H}$  NMR ( $\text{CDCl}_3$ , 600MHz) and  $^{13}\text{C}$  NMR ( $\text{CDCl}_3$ , 151 MHz) spectra of  $\text{Tp}^6\text{Tp}^6$ .

#### 4. HRMS

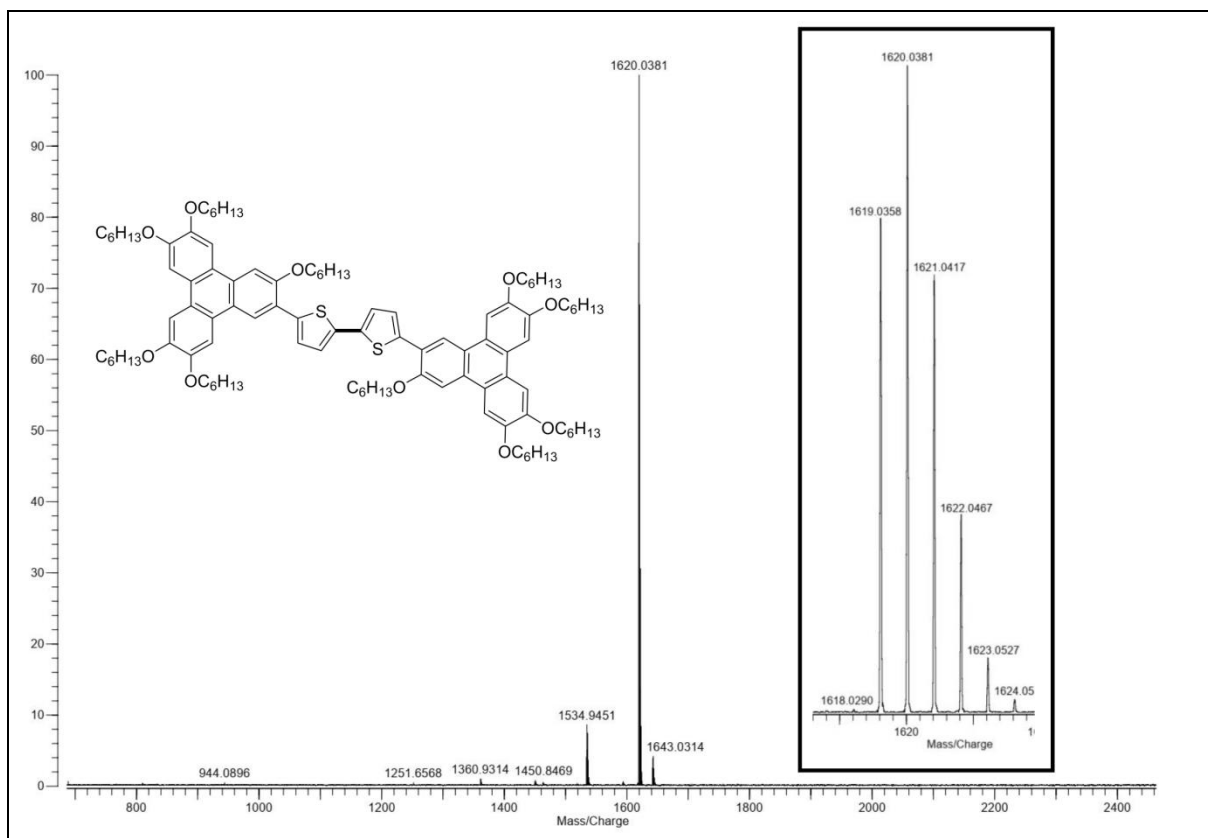

Figure S30. HRMS m/z(MALDI) spectrum of  $\text{Tp}^6\text{Th}_2\text{Tp}^6$ .

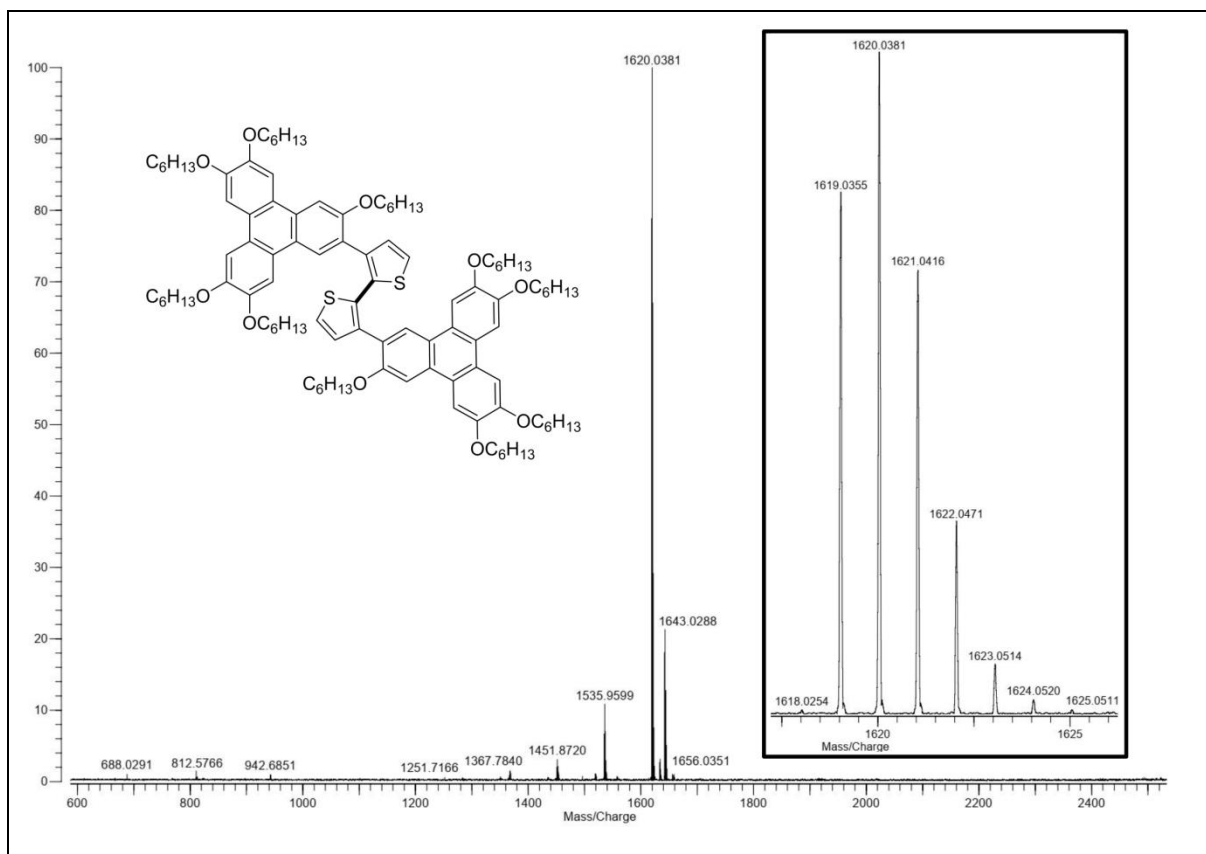

Figure S31. HRMS m/z(MALDI) spectrum of  $Tp^6\beta-Th_2Tp^6$ .

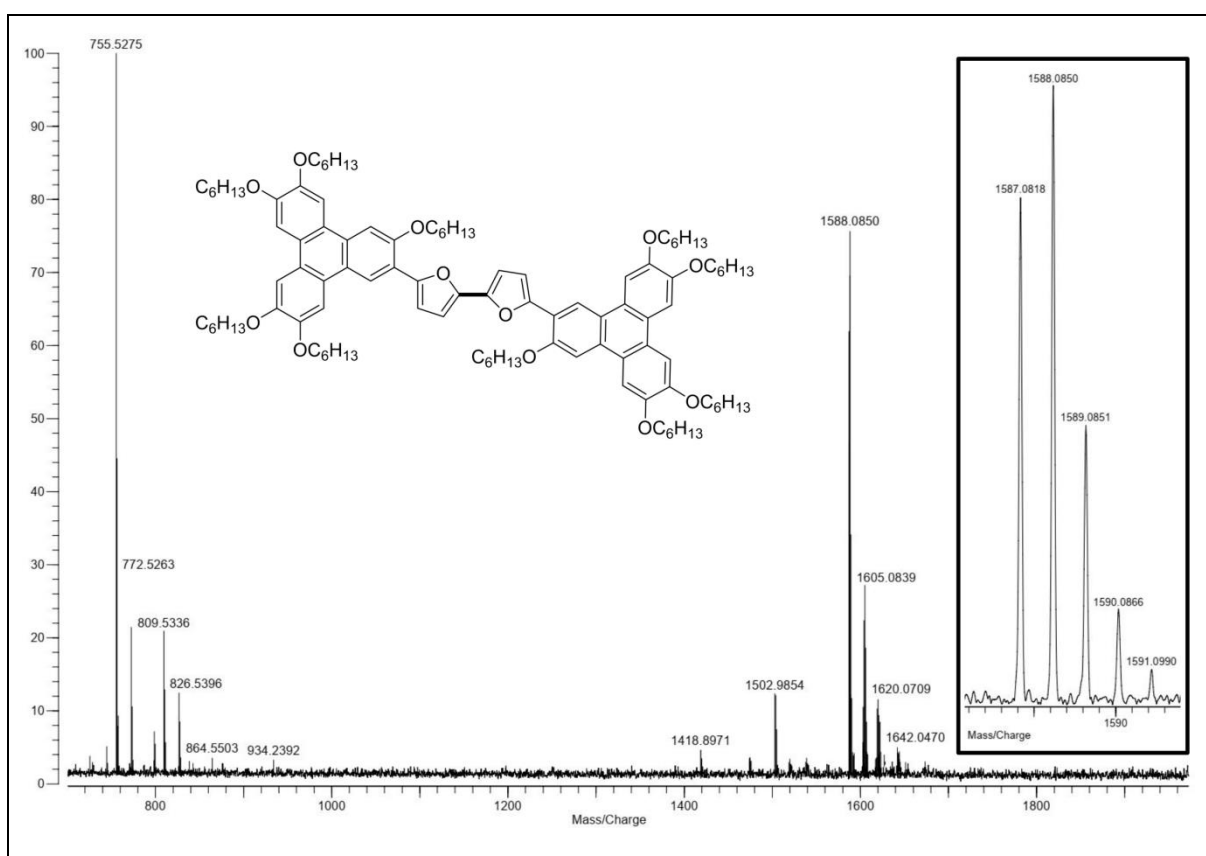

Figure S32. HRMS m/z(MALDI) spectrum of  $Tp^6Fu_2Tp^6$ .

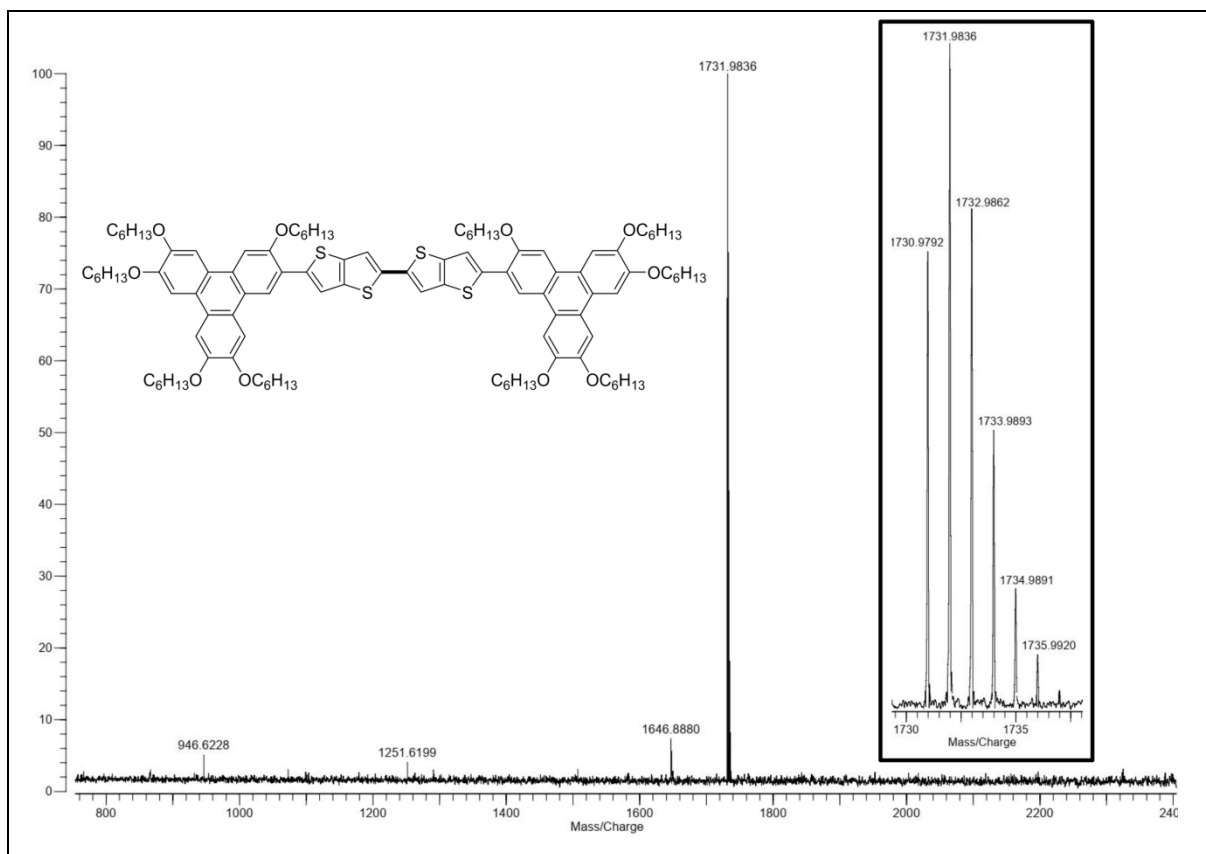

Figure S33. HRMS m/z(MALDI) spectrum of  $\text{Tp}^6\text{Tt}_2\text{Tp}^6$ .

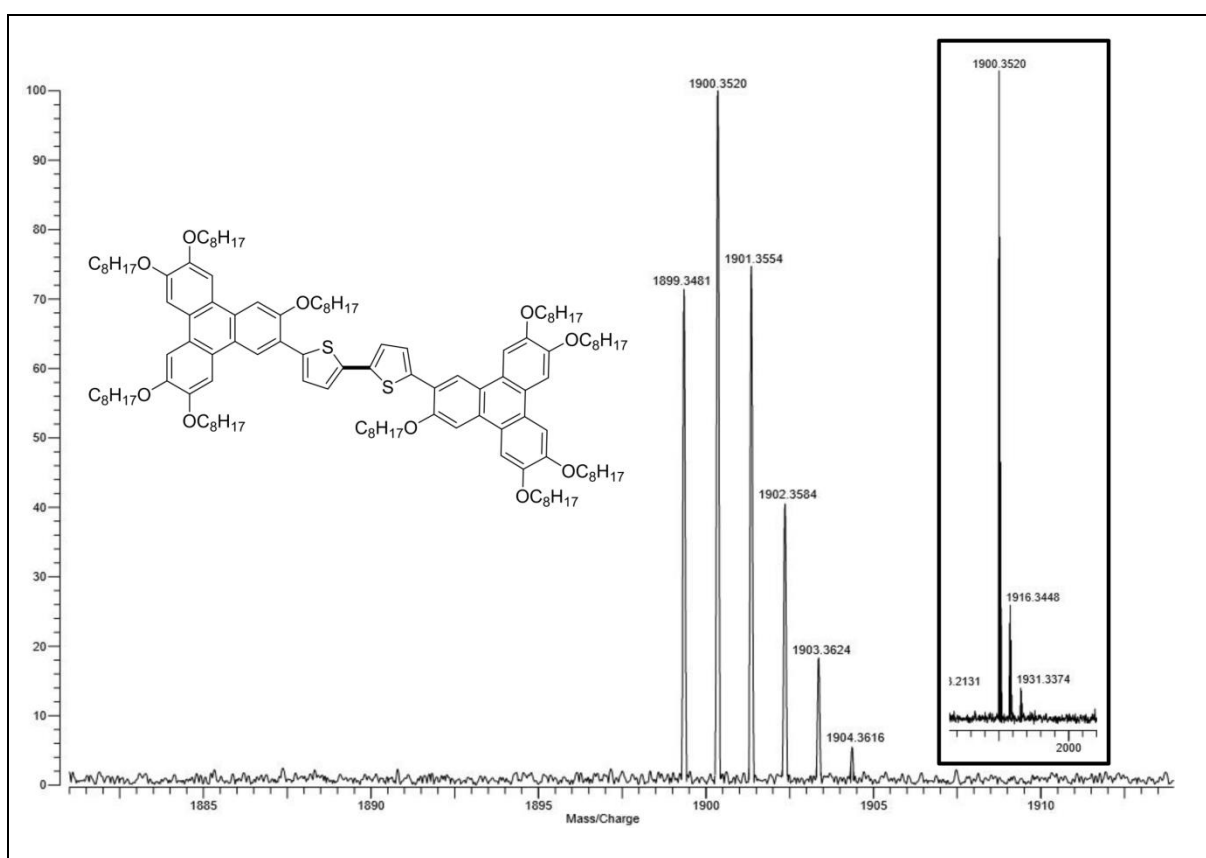

Figure S34. HRMS m/z(MALDI) spectrum of  $\text{Tp}^8\text{Th}_2\text{Tp}^8$ .

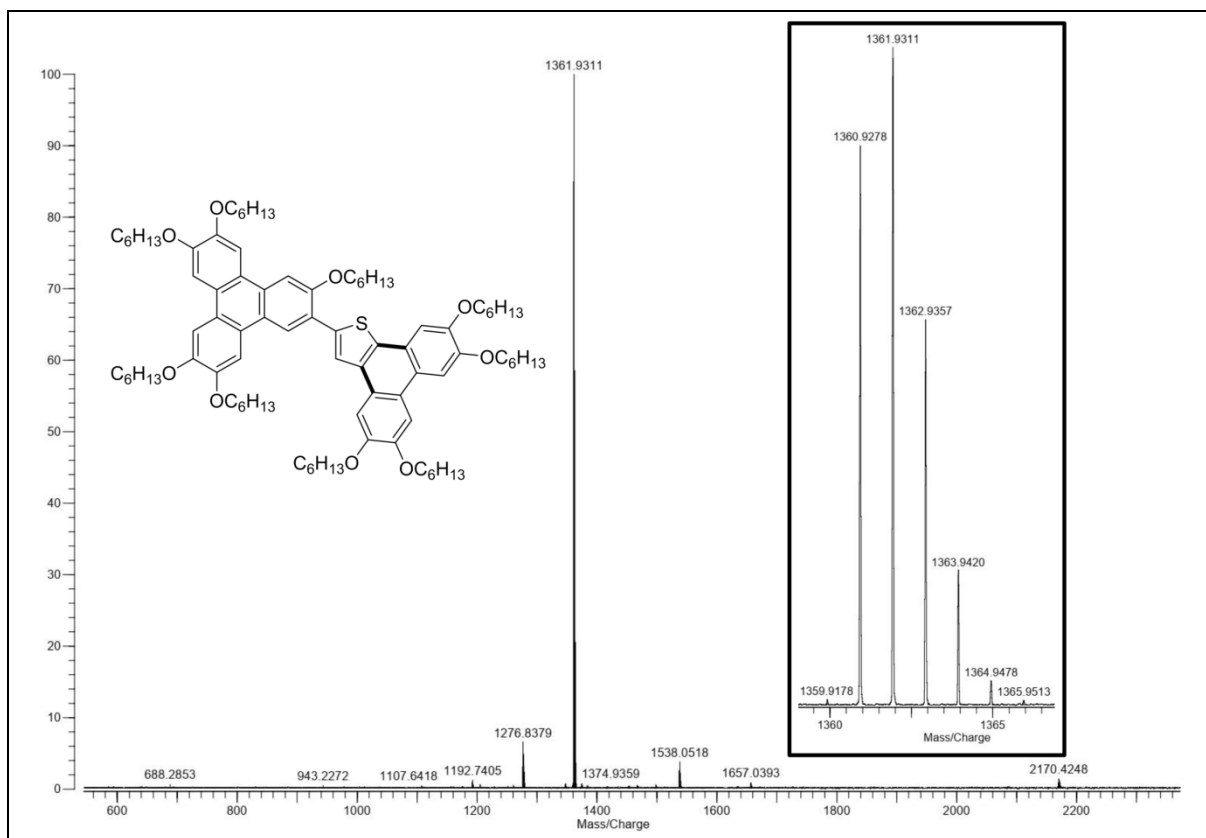

Figure S35. HRMS m/z(MALDI) spectrum of  $Tp^6T^6$ .

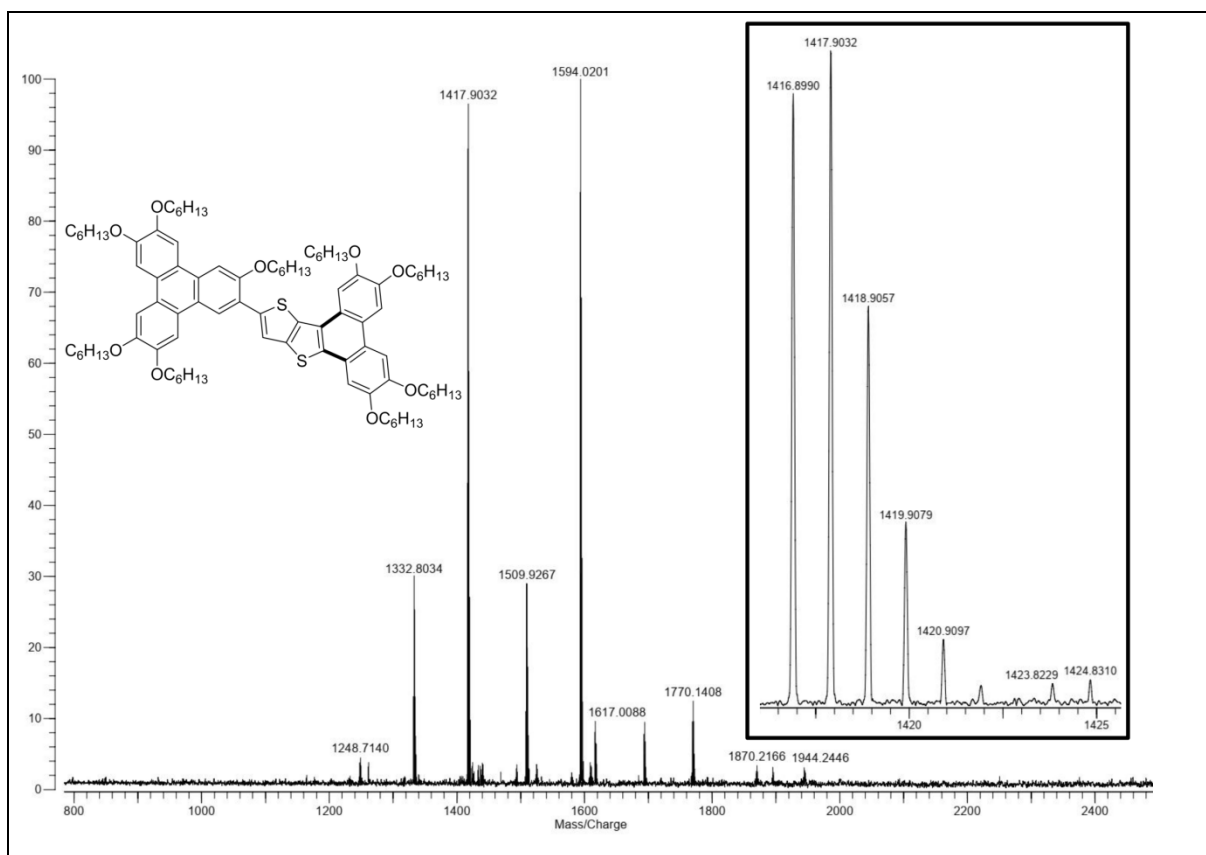

Figure S36. HRMS m/z(MALDI) spectrum of  $Tp^6Dt^6$ .



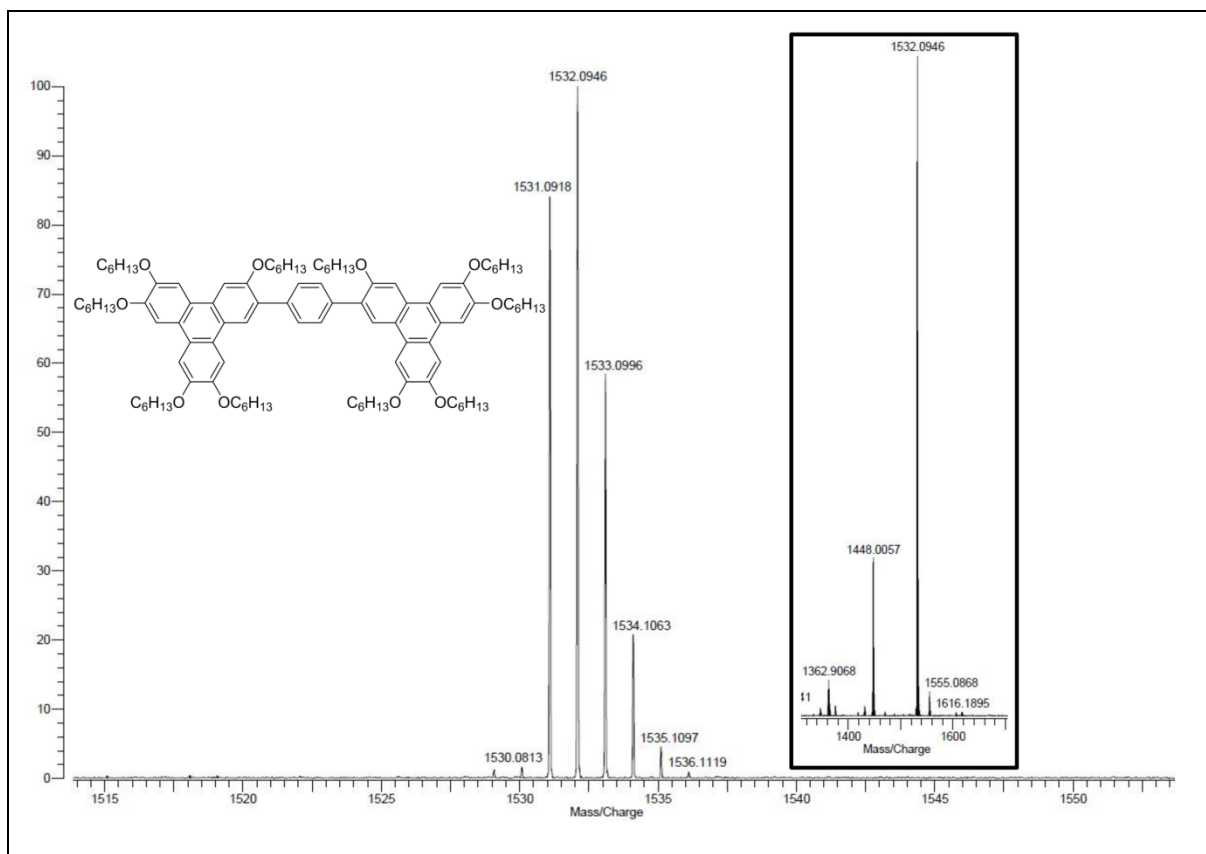

Figure S37. HRMS m/z(MALDI) spectrum of  $\text{Tp}^6\text{PhTp}^6$ .

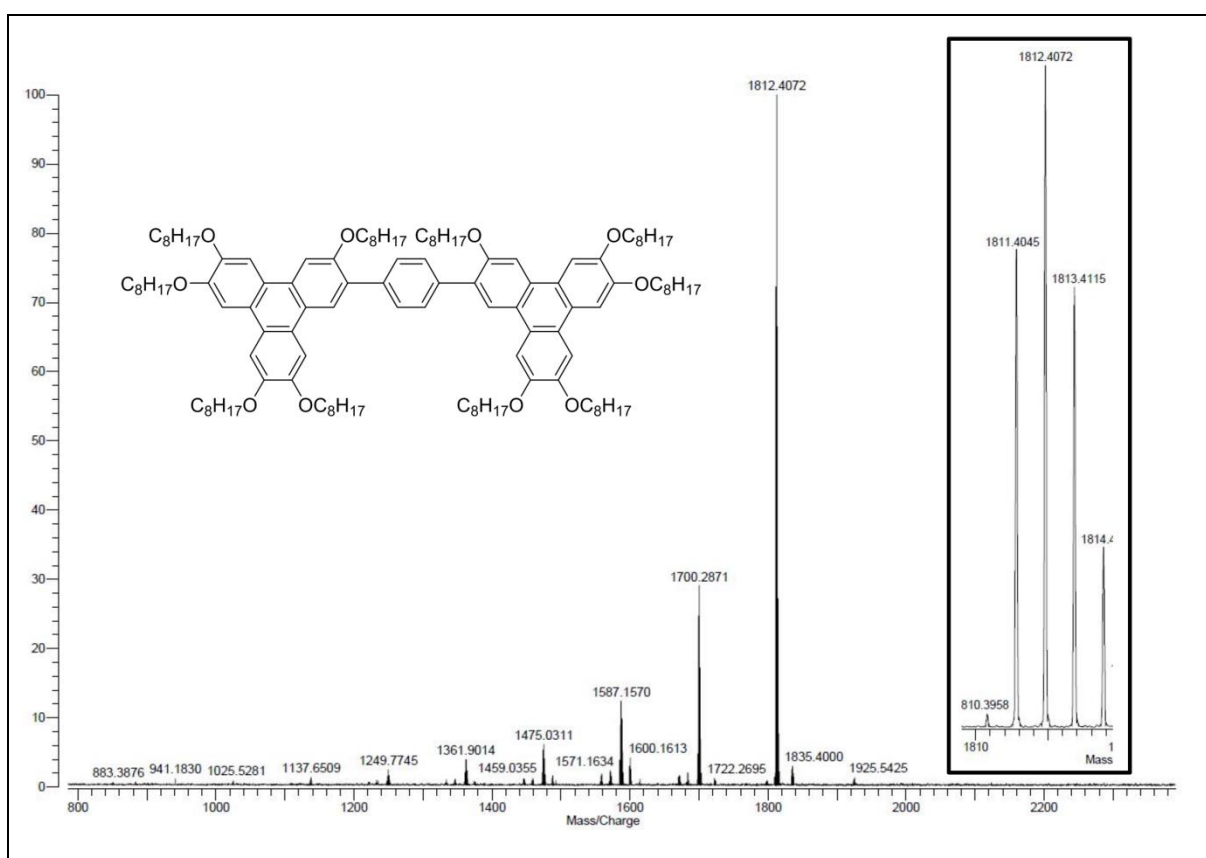

Figure S38. HRMS m/z(MALDI) spectrum of  $\text{Tp}^8\text{PhTp}^8$ .

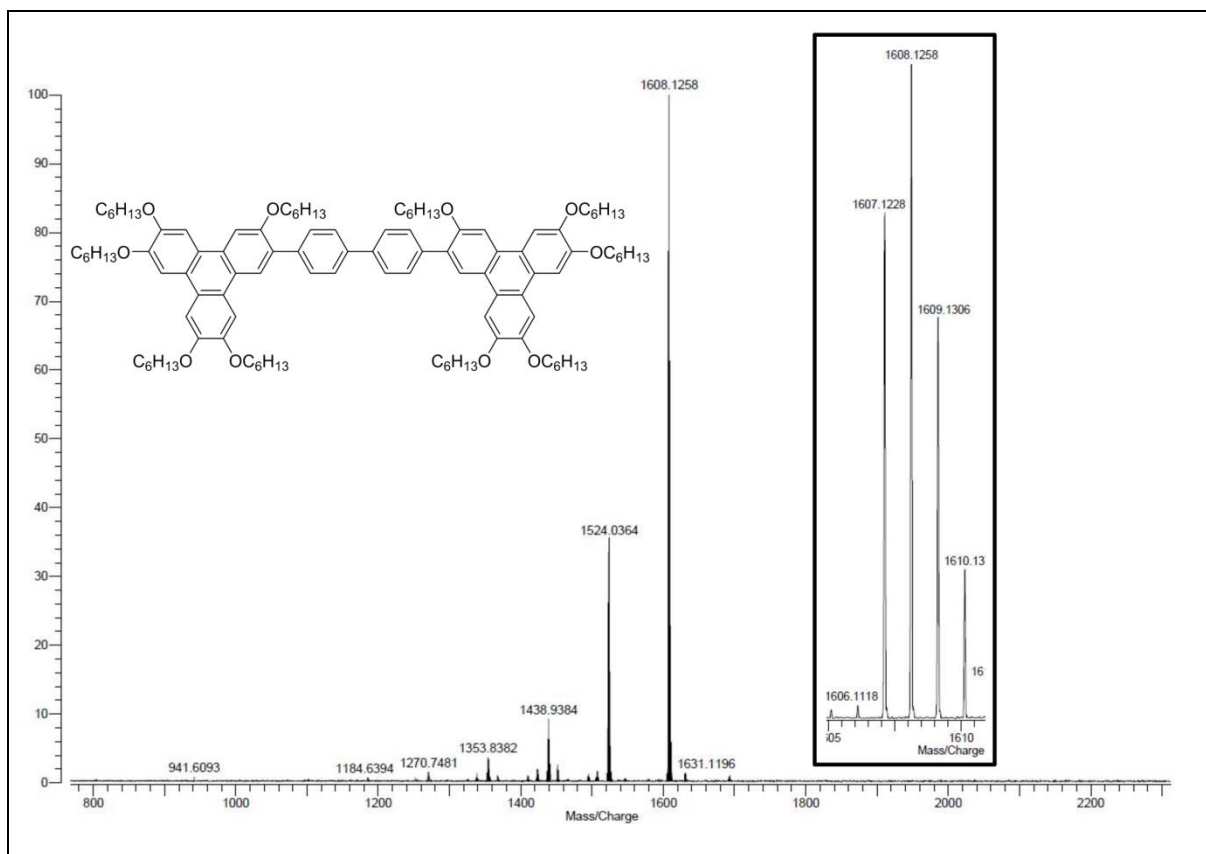

Figure S39. HRMS m/z(MALDI) spectrum of  $\text{Tp}^6\text{Ph}_2\text{Tp}^6$ .

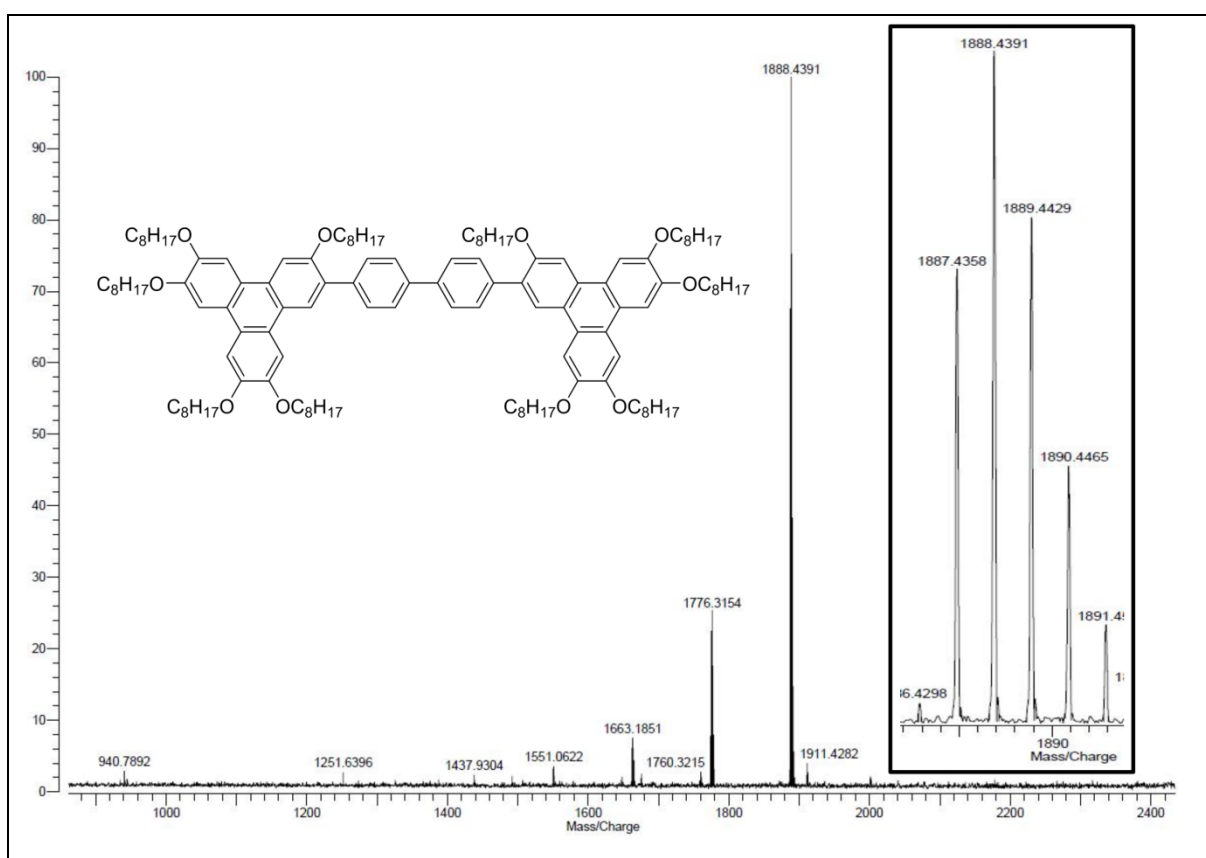

Figure S40. HRMS m/z(MALDI) spectrum of  $\text{Tp}^8\text{Ph}_2\text{Tp}^8$ .

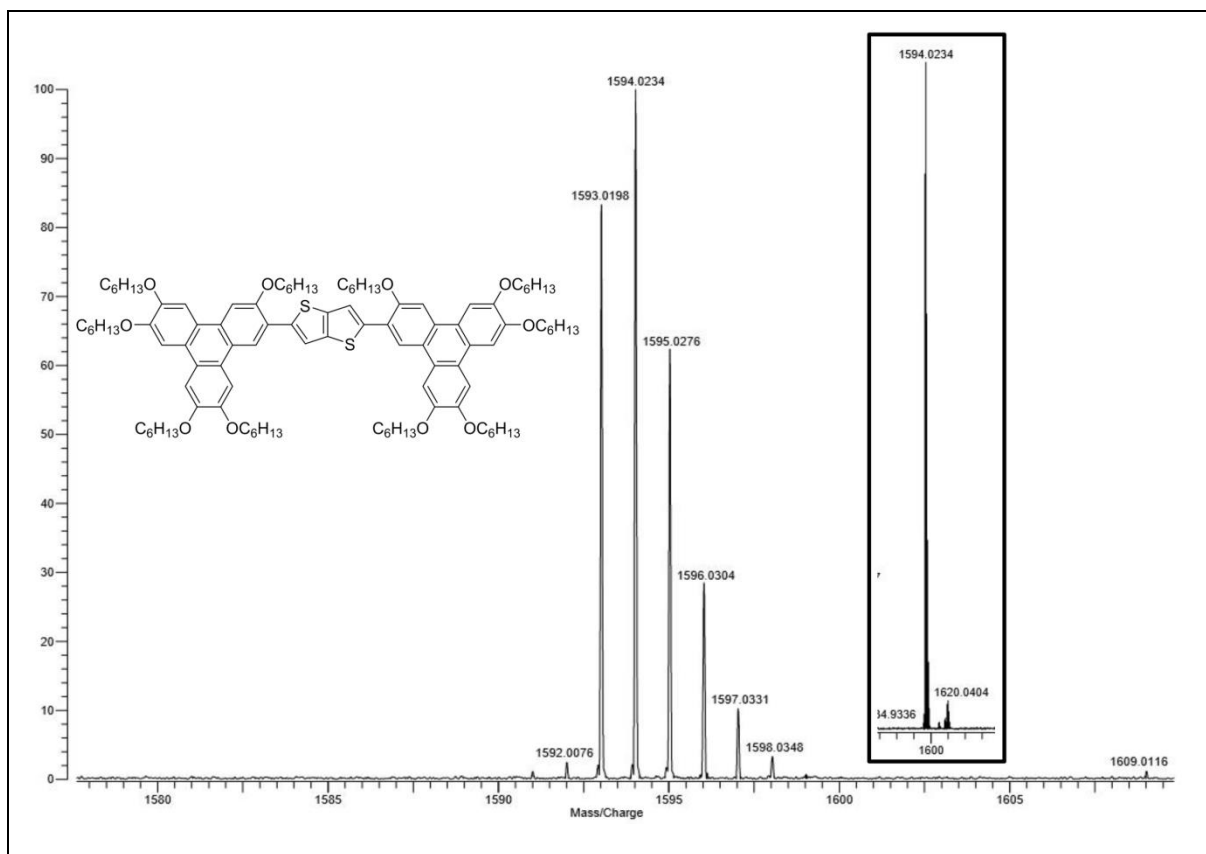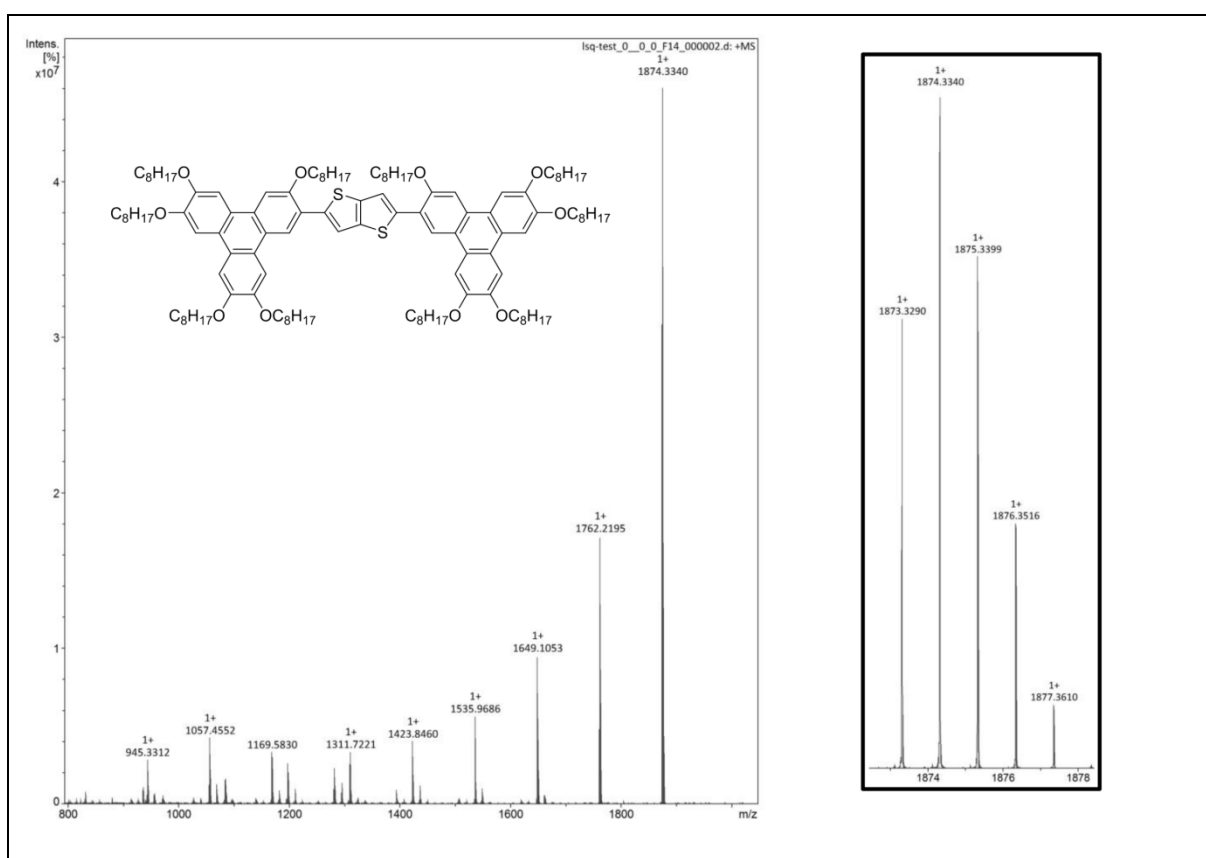

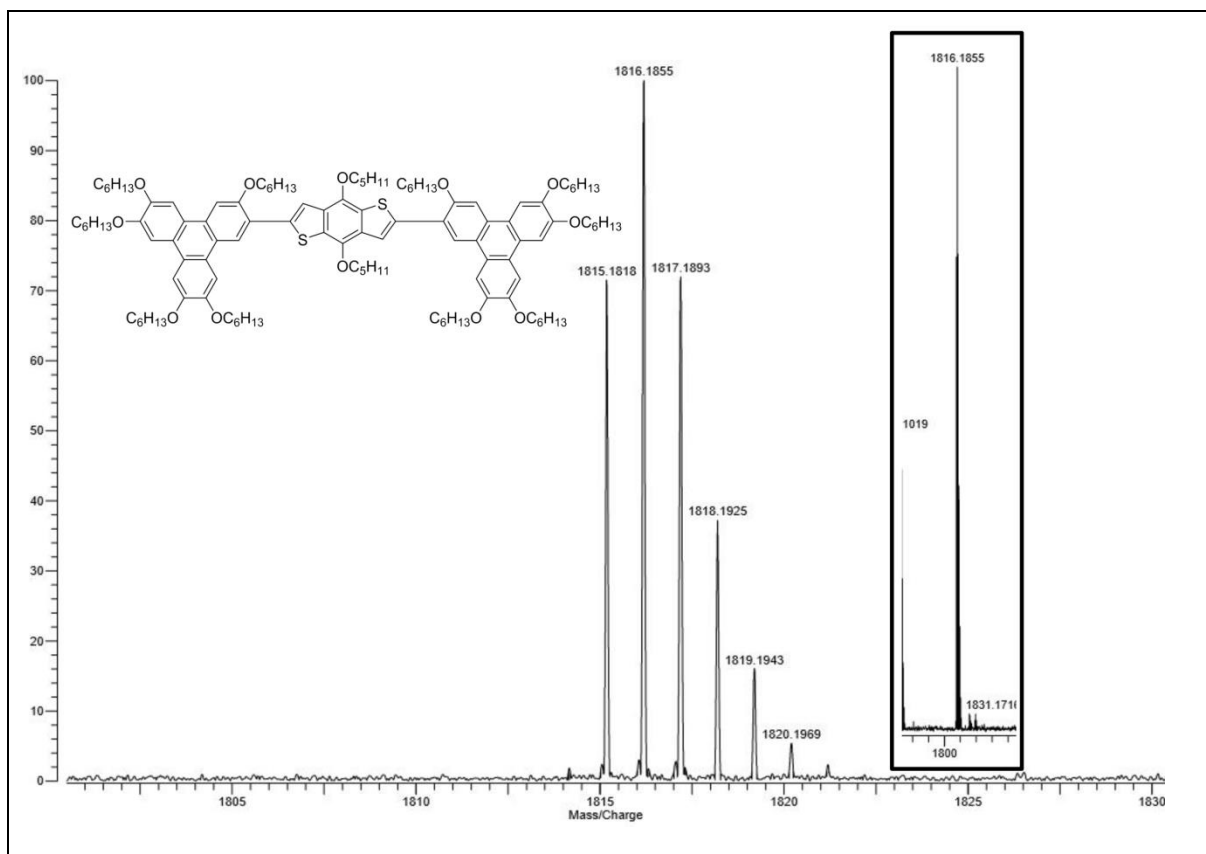

Figure S43. HRMS m/z(MALDI) spectrum of  $\text{Tp}^6\text{BtTp}^6$ .

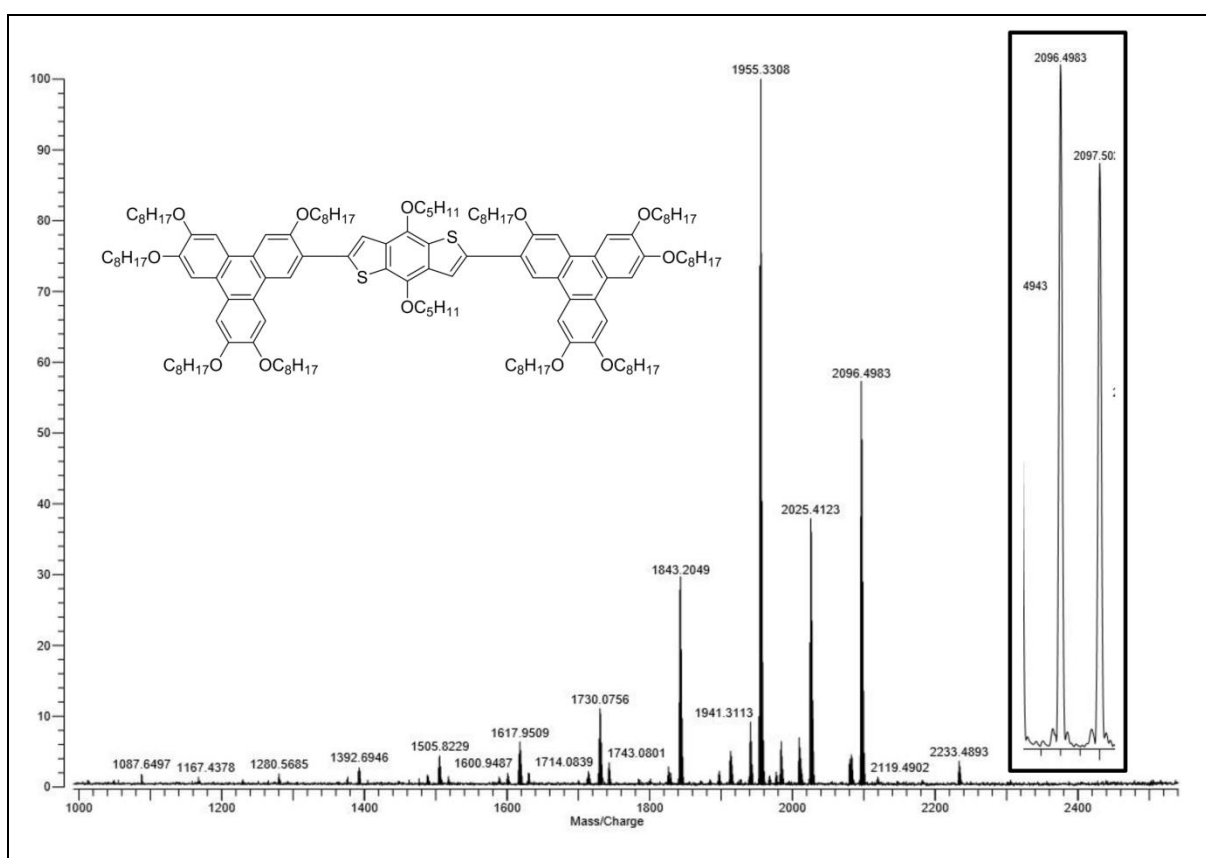

Figure S44. HRMS m/z(MALDI) spectrum of  $\text{Tp}^8\text{BtTp}^8$ .

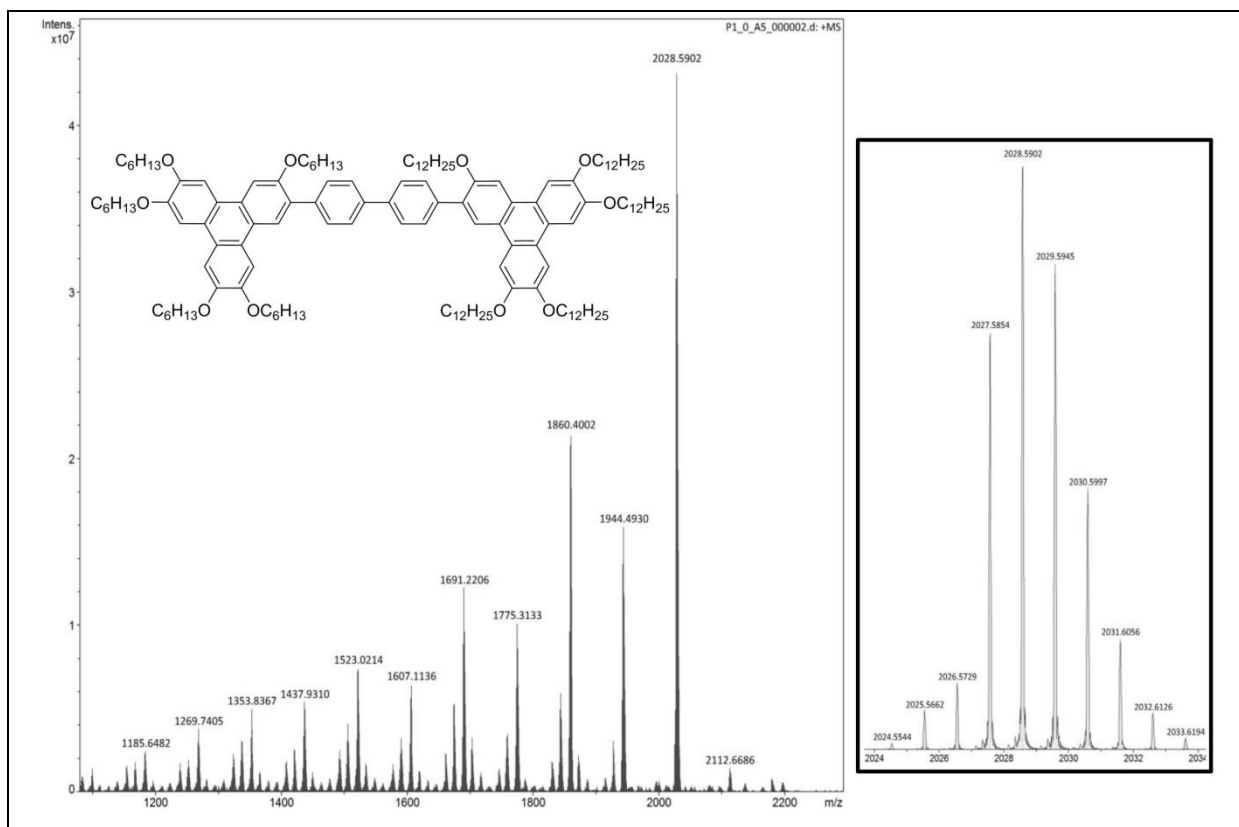

Figure S45. HRMS m/z(MALDI) spectrum of  $\text{Tp}^6\text{Ph}_2\text{Tp}^{12}$ .

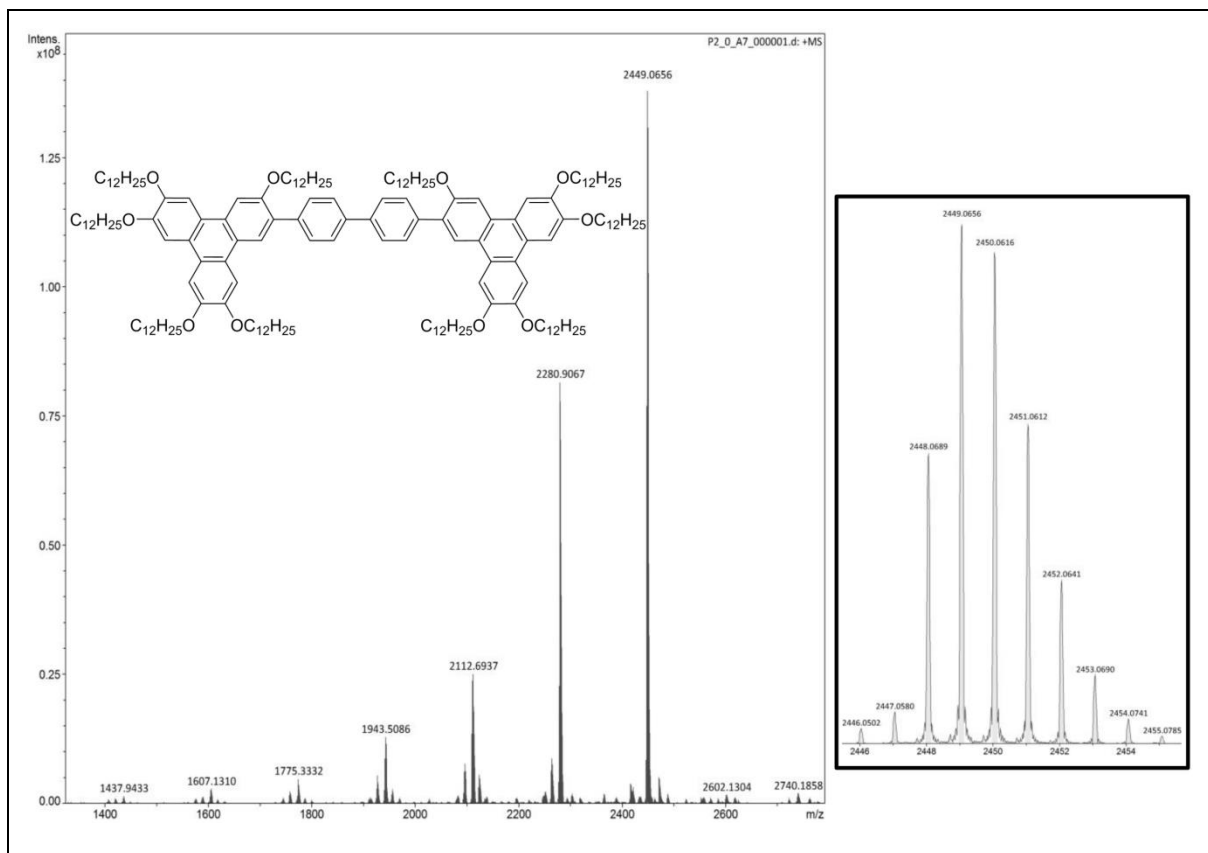

Figure S46. HRMS m/z(MALDI) spectrum of  $\text{Tp}^{12}\text{Ph}_2\text{Tp}^{12}$ .

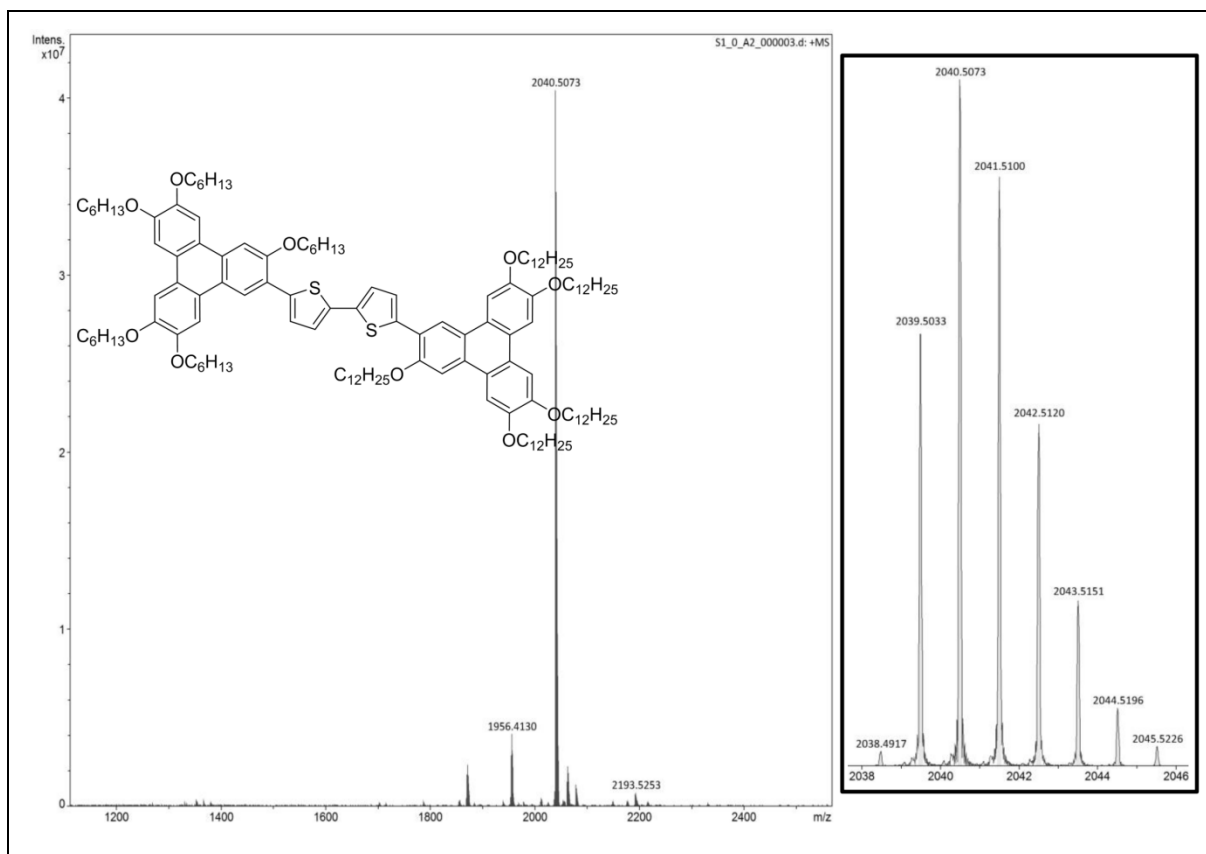

Figure S47. HRMS m/z(MALDI) spectrum of  $\text{Tp}^6\text{Th}_2\text{Tp}^{12}$ .

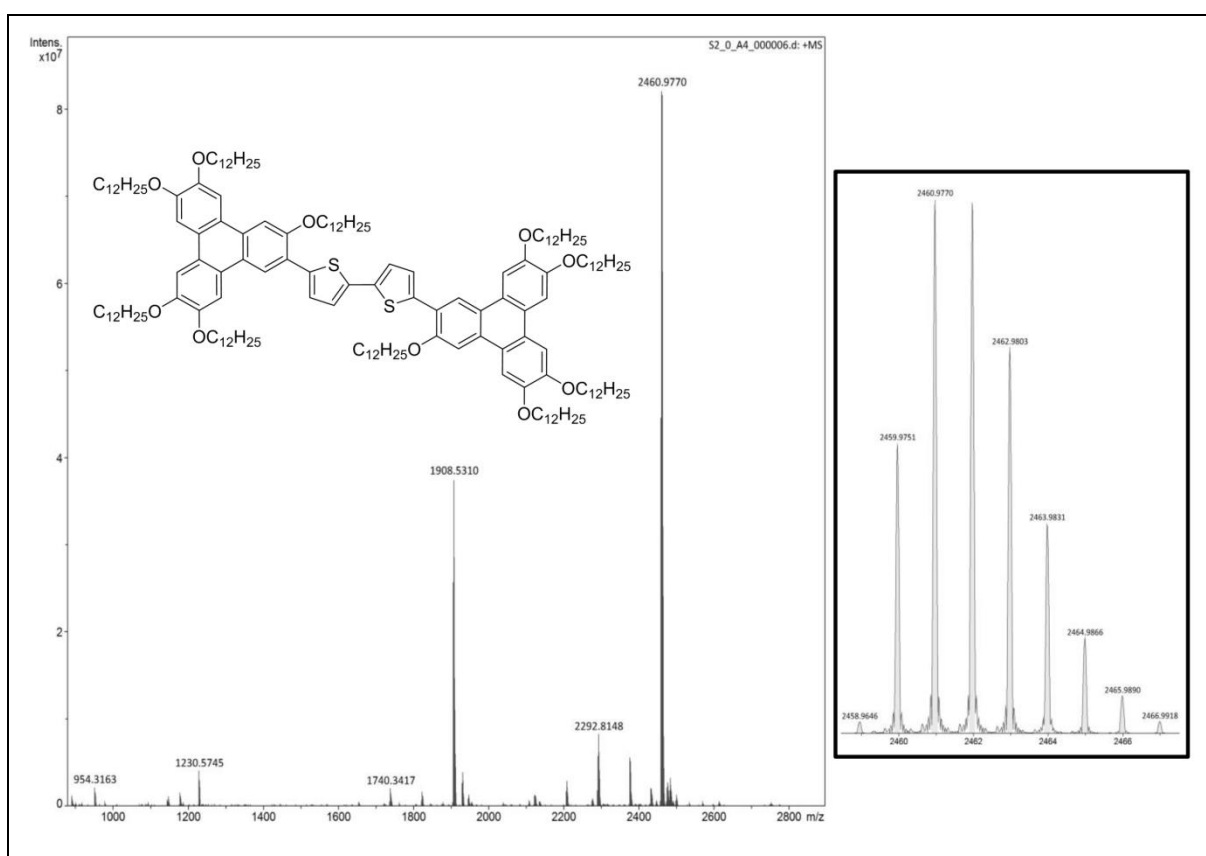

Figure S48. HRMS m/z(MALDI) spectrum of  $\text{Tp}^{12}\text{Th}_2\text{Tp}^{12}$ .

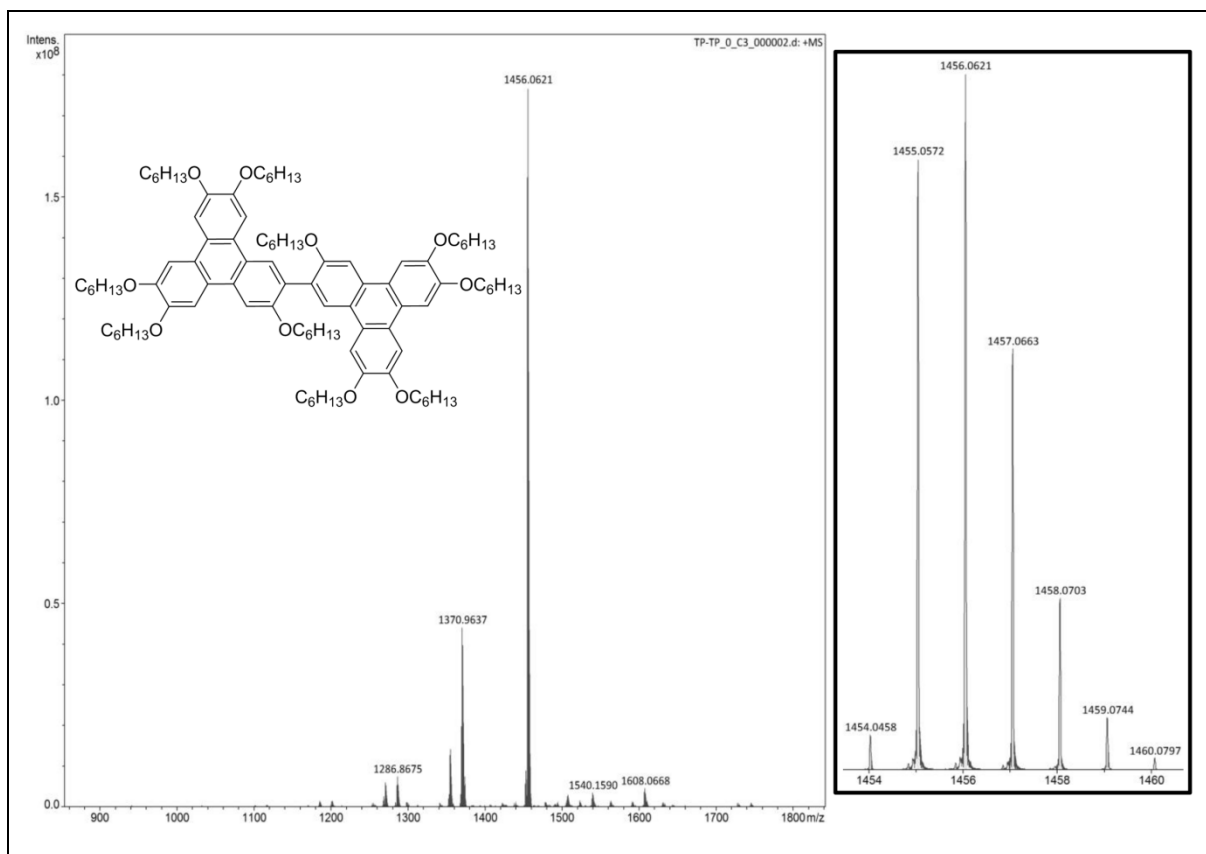

Figure S49. HRMS m/z(MALDI) spectrum of  $\text{Tp}^6\text{Tp}^6$ .

## 5. UV-Vis absorption and photoluminescence

**Table S1.** Summary of the UV/vis absorption<sup>[a]</sup> and fluorescence spectroscopic properties of the monomers in solution<sup>[b]</sup> and films<sup>[c]</sup>.

| Compound  | $\lambda_{\text{abs}}$ (nm) | $\epsilon$ ( $\times 10^4$ , L mol <sup>-1</sup> cm <sup>-1</sup> ) | $\lambda_{\text{em}}$ (nm) solution | $\lambda_{\text{em}}$ (nm) film | QY <sup>[d]</sup> [%] solution |
|-----------|-----------------------------|---------------------------------------------------------------------|-------------------------------------|---------------------------------|--------------------------------|
| <b>M1</b> | 261                         | 4.60                                                                | 400                                 | 420                             | 19.70                          |
|           | 290                         | 8.74                                                                | 412                                 | 431                             |                                |
|           | 345                         | 2.52                                                                |                                     |                                 |                                |
| <b>M2</b> | 252                         | 2.34                                                                | 391                                 | 406                             | 15.87                          |
|           | 262                         | 3.07                                                                | 403                                 |                                 |                                |
|           | 284                         | 7.73                                                                |                                     |                                 |                                |
|           | 320                         | 1.79                                                                |                                     |                                 |                                |
|           | 337                         | 1.35                                                                |                                     |                                 |                                |
| <b>M3</b> | 261                         | 4.09                                                                | 391                                 | 411                             | 25.18                          |
|           | 290                         | 10.61                                                               | 409                                 | 492                             |                                |
|           | 334                         | 3.00                                                                |                                     |                                 |                                |
|           | 349                         | 3.13                                                                |                                     |                                 |                                |
|           | 378                         | 0.40                                                                |                                     |                                 |                                |
| <b>M4</b> | 263                         | 5.10                                                                | 401                                 | 437                             | 30.05                          |
|           | 294                         | 6.78                                                                | 422                                 | 459                             |                                |
|           | 359                         | 3.45                                                                |                                     | 483                             |                                |
| <b>M5</b> | 261                         | 4.68                                                                | 401                                 | 436                             | 19.10                          |
|           | 290                         | 8.63                                                                | 411                                 |                                 |                                |
|           | 346                         | 2.47                                                                |                                     |                                 |                                |

|             |     |       |     |     |     |
|-------------|-----|-------|-----|-----|-----|
| <b>M0-1</b> | 260 | 5.87  | 370 | --- | --- |
|             | 269 | 8.81  | 391 |     |     |
|             | 278 | 12.24 | 412 |     |     |
|             | 309 | 3.11  |     |     |     |
| <b>M0-2</b> | 260 | 5.49  | 371 | --- | --- |
|             | 269 | 8.06  | 391 |     |     |
|             | 278 | 10.98 | 412 |     |     |
|             | 309 | 2.82  |     |     |     |

[a] UV-vis absorption measured in THF solution with a concentration of  $1 \times 10^{-5} \text{ mol L}^{-1}$  ( $\lambda$  in nm, absorption coefficient,  $\epsilon$ , in  $\times 10^4 \text{ L mol}^{-1} \text{ cm}^{-1}$ ). [b] In micromolar THF solutions with solution concentration of  $1 \times 10^{-5} \text{ mol L}^{-1}$ . Excitation wavelength: 310 nm for all monomers. [c] The thin films were obtained by drop-casting dilute THF solution and evaporation of solvent. Excitation wavelength: 320 nm for **M3** and 340 nm for others. [d] Quantum yields (QY) in % were measured with solution concentration of  $1 \times 10^{-5} \text{ mol L}^{-1}$  in THF excited at 310 nm as well.

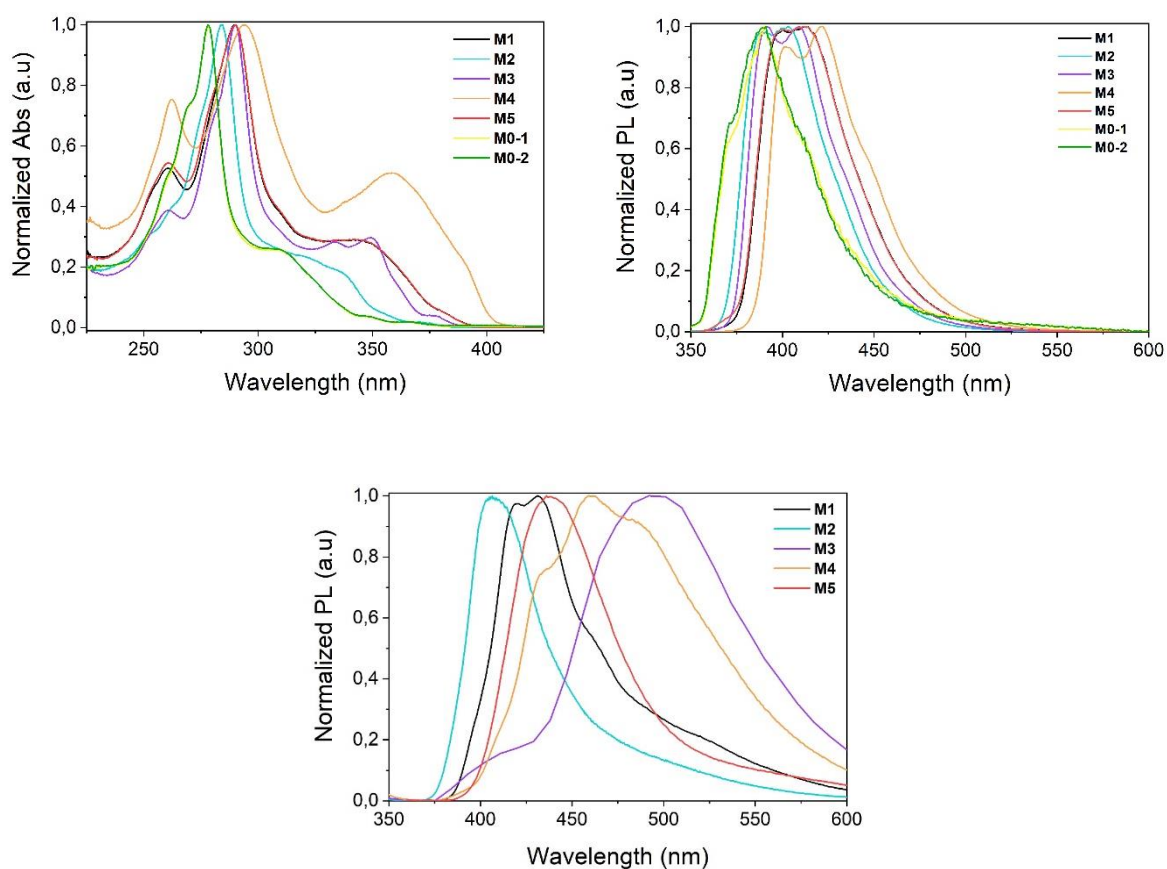

**Figure S50.** Absorption and photoluminescence of the monomeric precursors. From top to bottom: UV/Vis absorption spectra; photoluminescence spectra in micromolar THF solution; and photoluminescence spectra in thin-films.



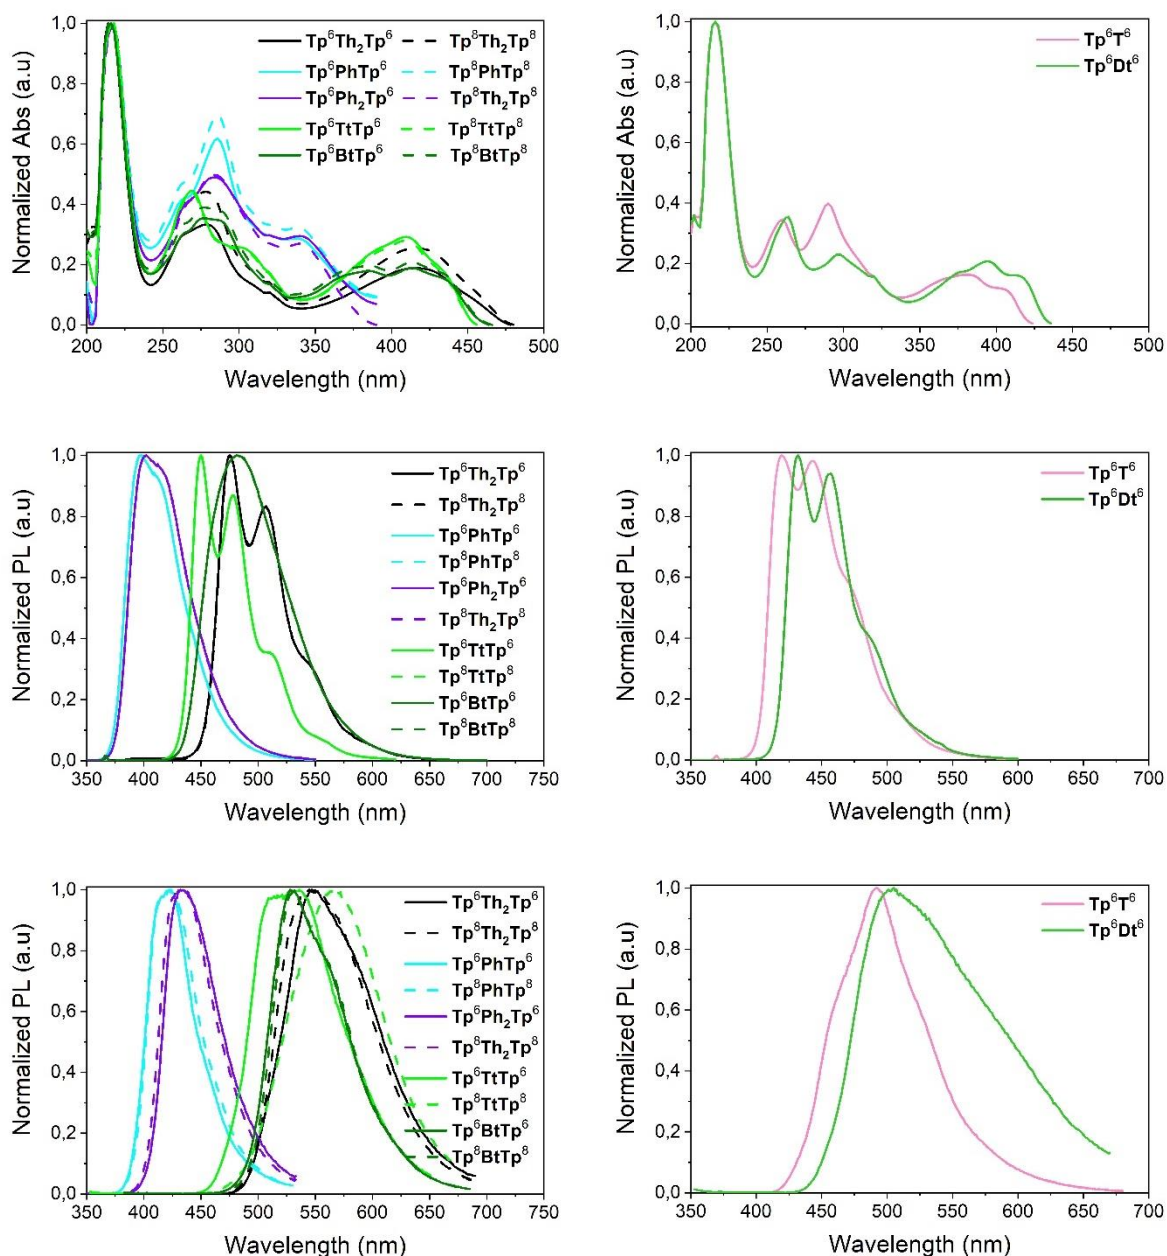

**Figure S51.** From top to bottom, and left to right: UV/Vis absorption spectra; photoluminescence spectra in micromolar THF solution; and photoluminescence spectra in thin-films of symmetrical dimeric compounds (effect of the chain-length,  $n = 6$  and  $8$ ) and for unsymmetrical dimers  $\text{Tp}^6\text{T}^6$  and  $\text{Tp}^6\text{Dt}^6$  (effect of the chain-length).

**Table S2.** Summary of the UV/vis absorption<sup>[a]</sup> and fluorescence spectroscopic properties of the unsymmetrical dimeric compounds in solution<sup>[b]</sup> and films<sup>[c]</sup>.

| Compound                | $\lambda_{\text{abs}}^{\text{[a]}}$ | $\epsilon^{\text{[a]}}$ | $\lambda_{\text{em}}^{\text{[b]}}$ | $\lambda_{\text{em}}^{\text{[c]}}$ | QY <sup>[d]</sup> [%]<br>solution |
|-------------------------|-------------------------------------|-------------------------|------------------------------------|------------------------------------|-----------------------------------|
| $\text{Tp}^6\text{T}^6$ | 216                                 | 28.01                   |                                    |                                    | 26.82                             |
|                         | 260                                 | 9.68                    | 419                                |                                    |                                   |
|                         | 290                                 | 11.16                   | 443                                | 492                                |                                   |
|                         | 320                                 | 4.43                    | 472                                |                                    |                                   |
|                         | 382                                 | 4.57                    |                                    |                                    |                                   |
|                         | 404                                 | 3.28                    |                                    |                                    |                                   |

|                                     |     |       |     |     |       |
|-------------------------------------|-----|-------|-----|-----|-------|
|                                     | 216 | 27.20 |     |     |       |
|                                     | 264 | 9.68  |     |     |       |
|                                     | 296 | 6.31  | 432 |     |       |
| <b>Tp<sup>6</sup>Dt<sup>6</sup></b> | 320 | 4.33  | 457 | 505 | 45.12 |
|                                     | 376 | 4.72  | 487 |     |       |
|                                     | 394 | 5.70  |     |     |       |
|                                     | 414 | 4.43  |     |     |       |

[a] UV-vis absorption measured in THF solution with a concentration of  $1 \times 10^{-5}$  mol L<sup>-1</sup> ( $\lambda_{\text{abs}}$  in nm, absorption coefficient,  $\epsilon$ , in  $\times 10^4$  L mol<sup>-1</sup>cm<sup>-1</sup>). [b] Emission ( $\lambda_{\text{em}}$  in nm) in THF solutions with solution concentration of  $1 \times 10^{-5}$  mol L<sup>-1</sup>. Excitation wavelength: 370 nm for **Tp<sup>6</sup>T<sup>6</sup>**; 270 nm for **Tp<sup>6</sup>Dt<sup>6</sup>**. [c] Emission ( $\lambda_{\text{em}}$  in nm) in thin films. The thin films were obtained by drop-casting dilute THF solution and evaporation of solvent. Excitation wavelength: 370 nm for **Tp<sup>6</sup>T<sup>6</sup>**; 340 nm for **Tp<sup>6</sup>Dt<sup>6</sup>**. [d] Quantum yields (QY) in % were measured with solution concentration of  $1 \times 10^{-5}$  mol L<sup>-1</sup> in THF excited at different wavelengths (with the same excitation wavelengths used for [b]).

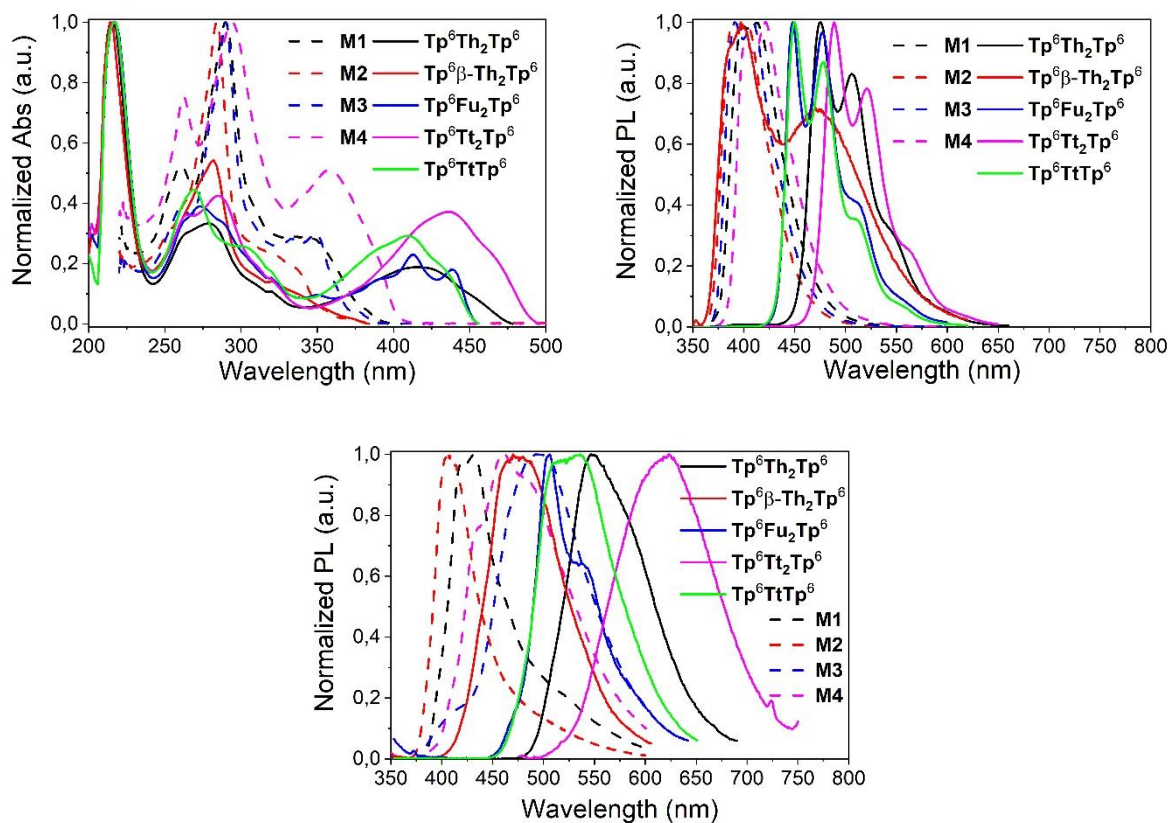

**Figure S52.** Comparison of the absorption and photoluminescence (solution and film) of the monomeric precursors and corresponding p-bridged dimers.

## 6. Gels and xerogels

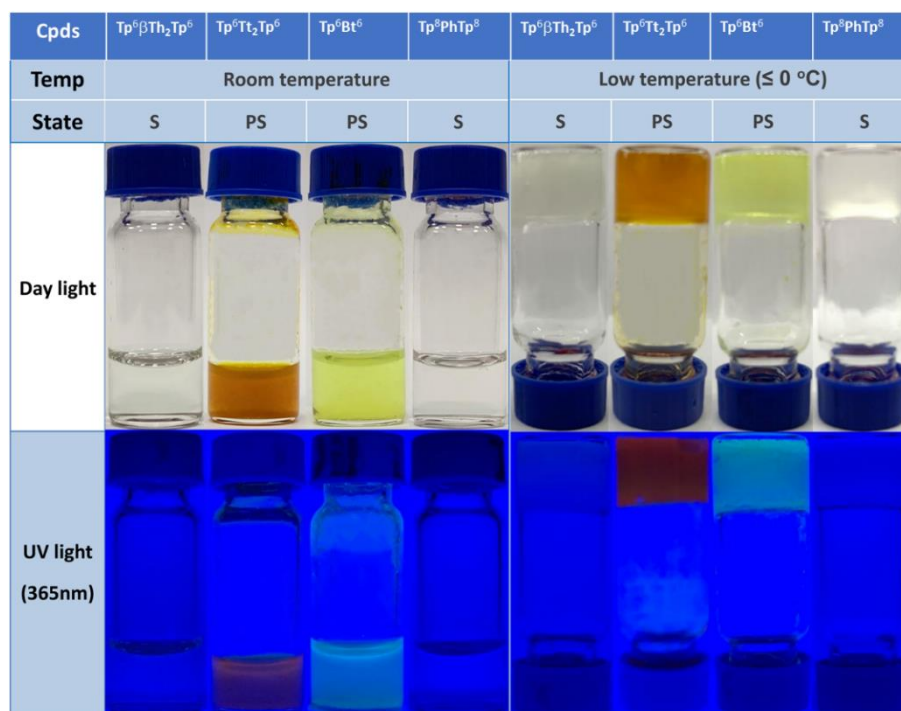

**Figure S53.** Effect of temperature on gel formation in day light (top) and under UV irradiation (365 nm, bottom). S and PS indicate the state of the mixture corresponding to solution and poor solution, respectively. The numbers in brackets correspond to the critical (minimum) gelation concentration (CGC/MGC) in mg mL<sup>-1</sup>.

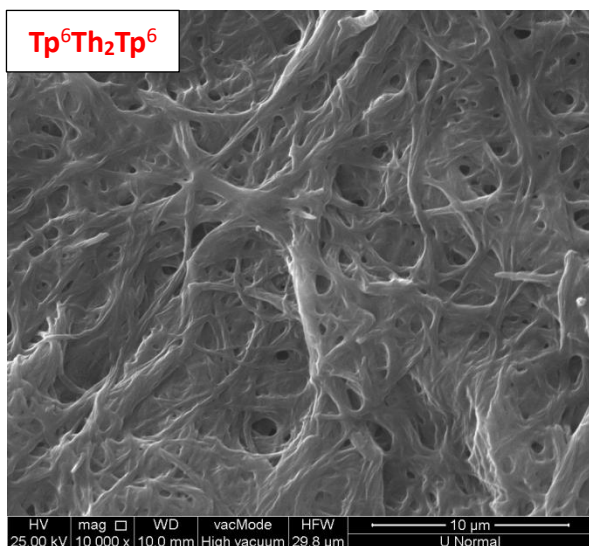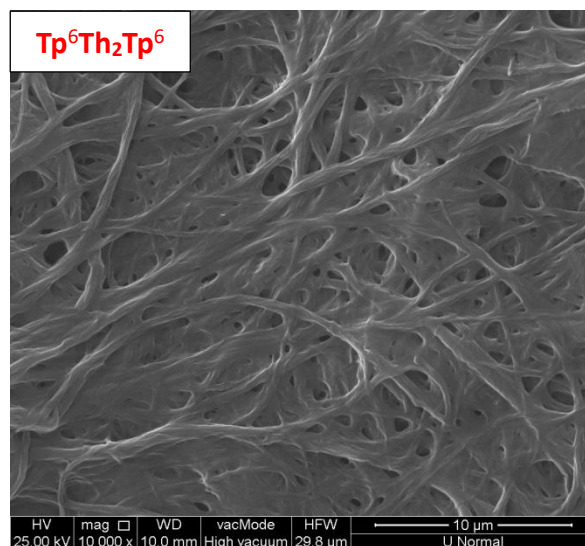

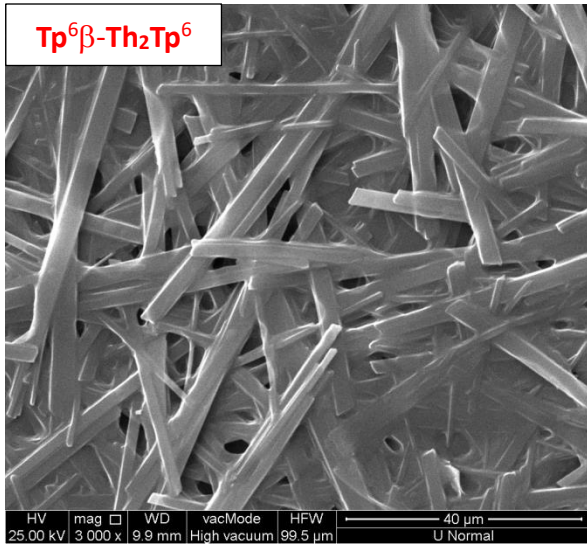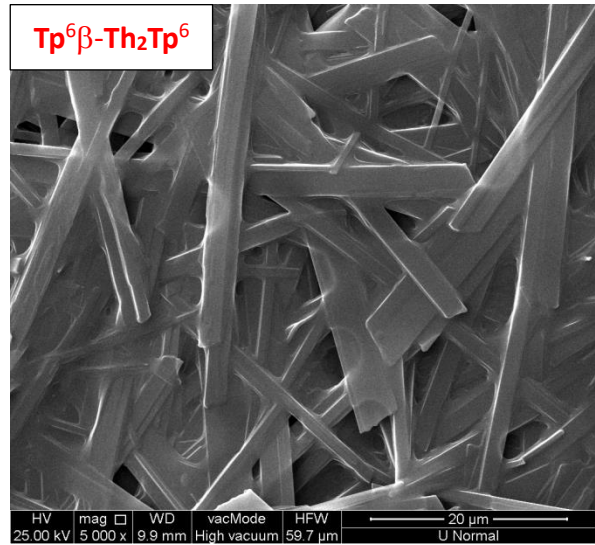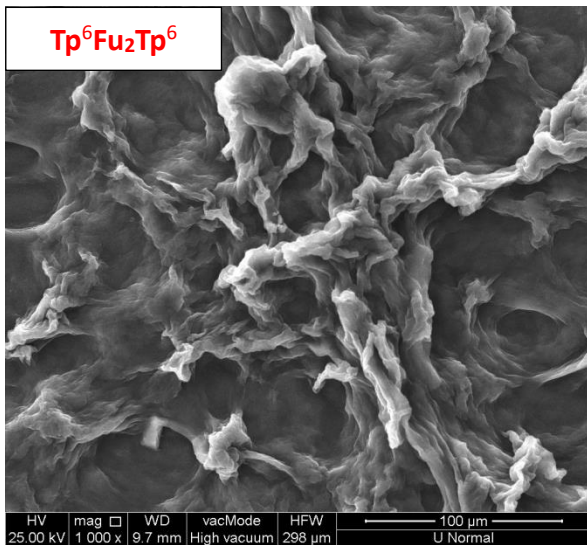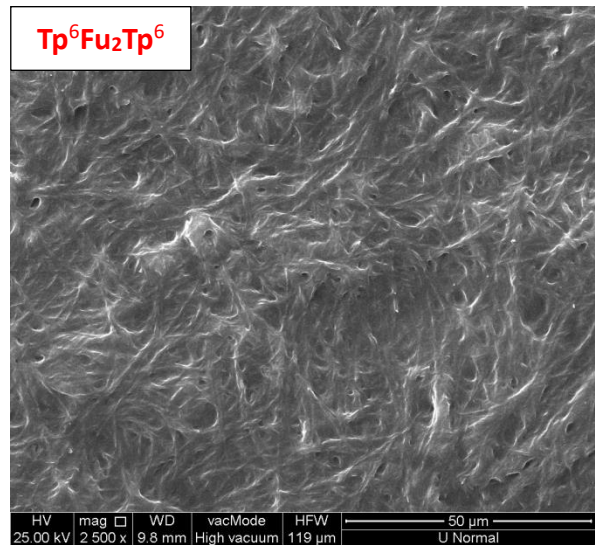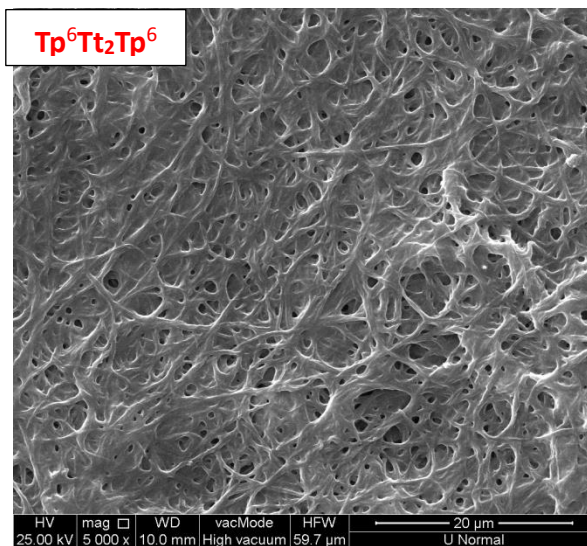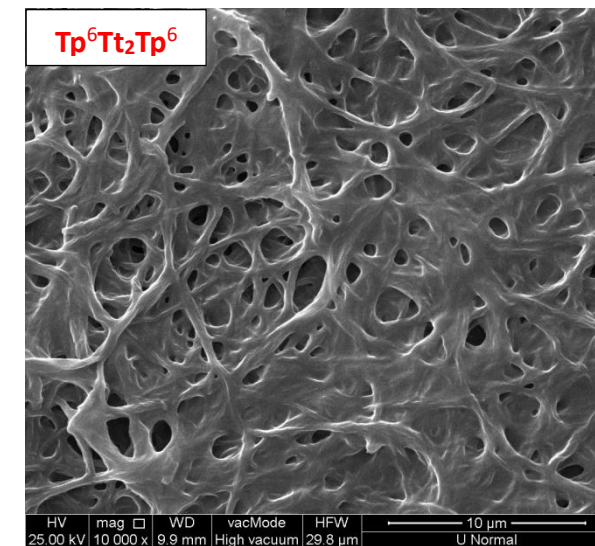

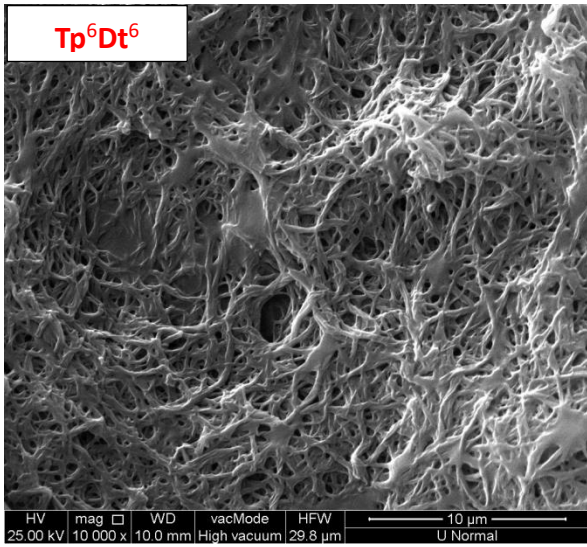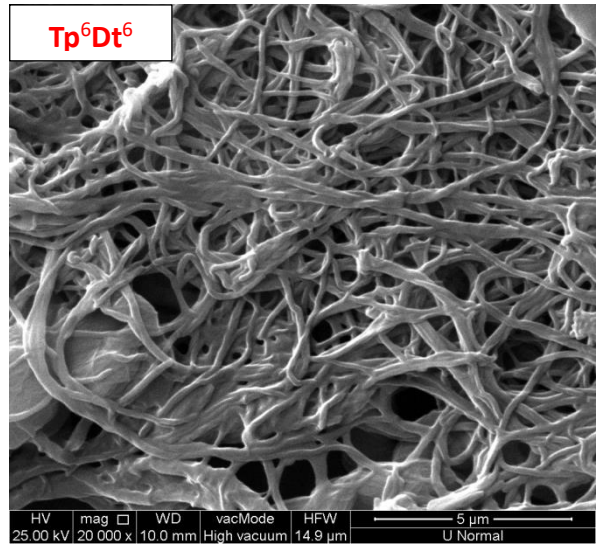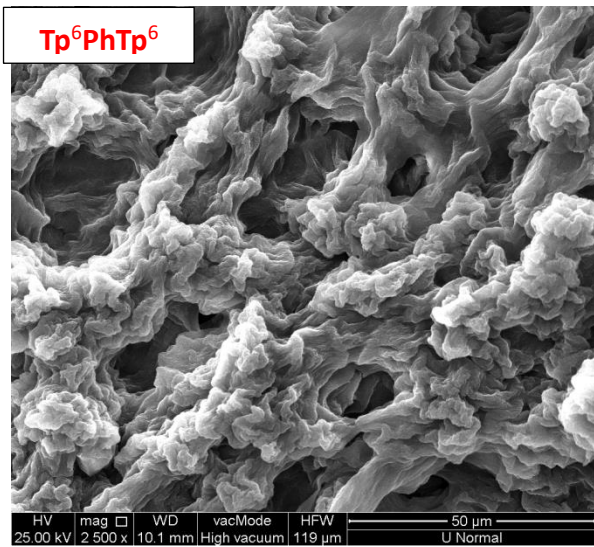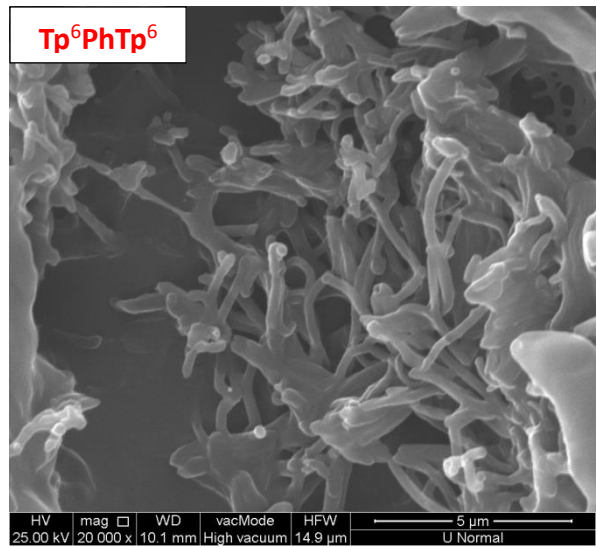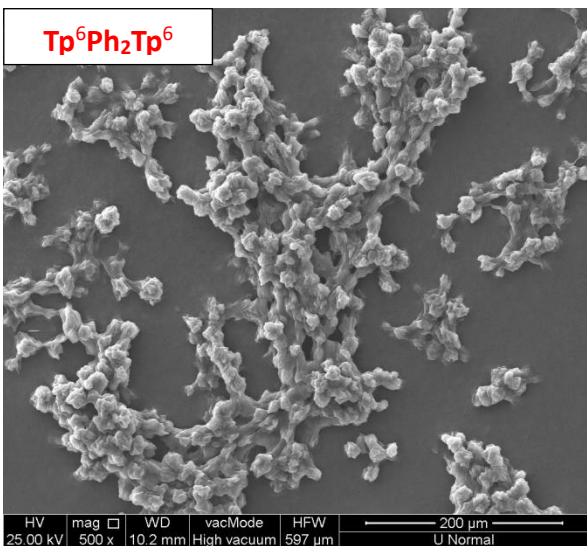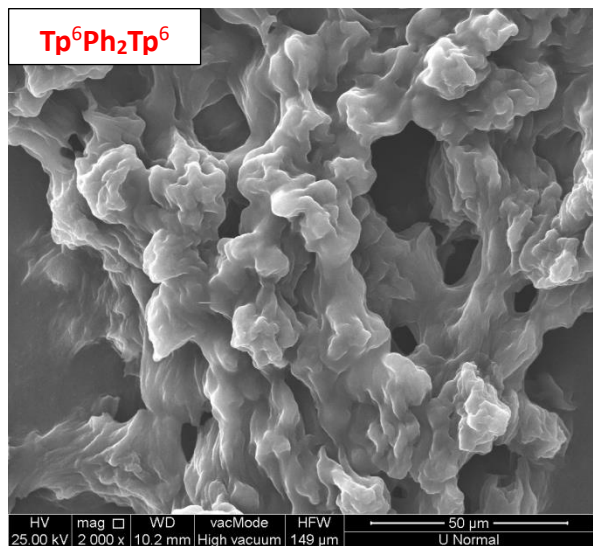

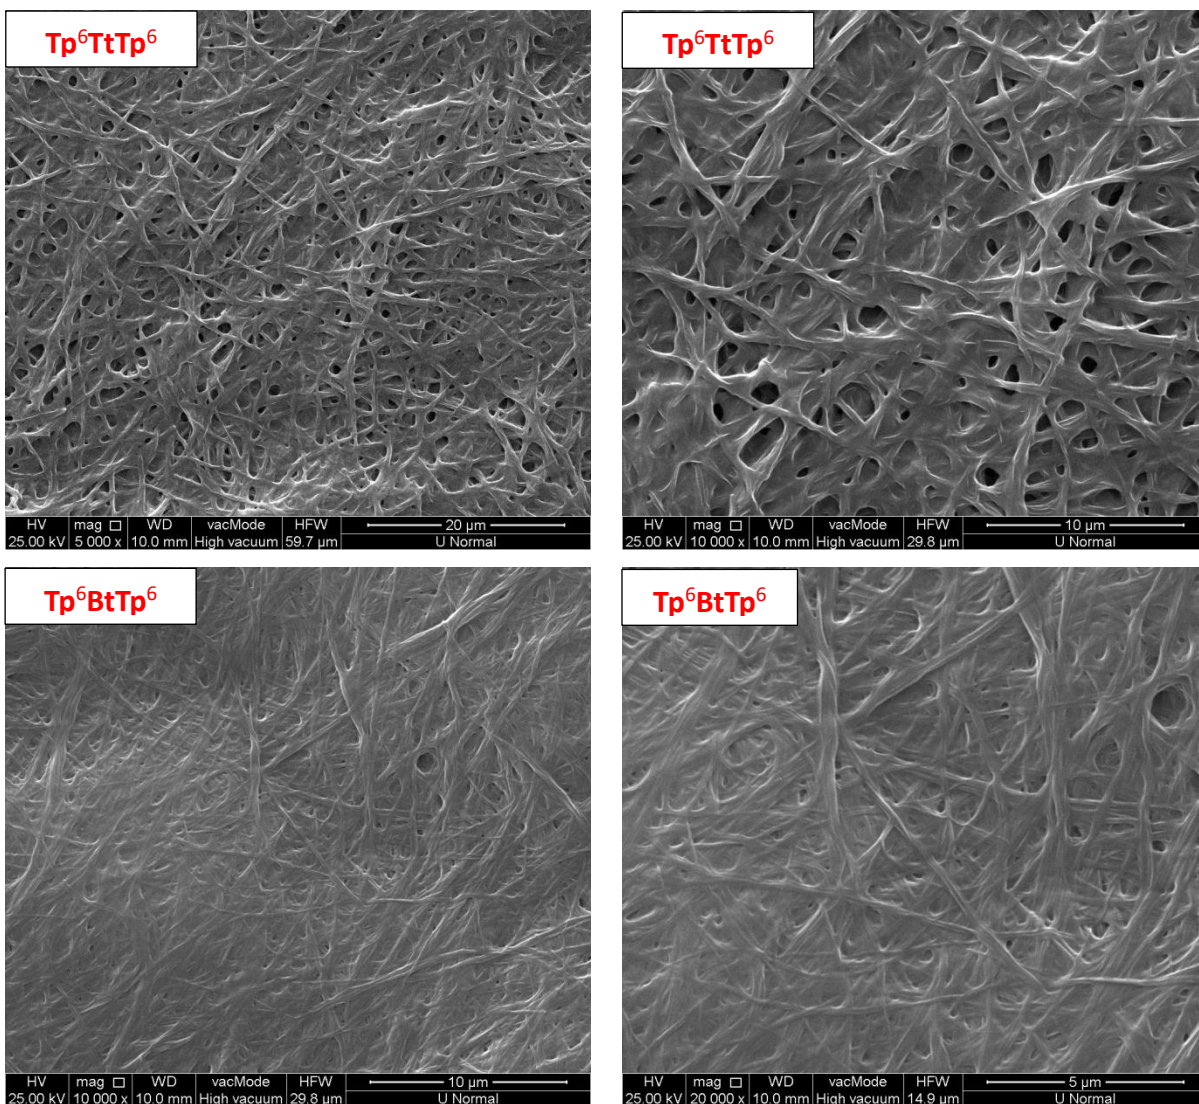

**Figure S54.** Xero-gel SEM images of representative target dimeric compounds in different solvents.  $\text{Tp}^6\text{Th}_2\text{Tp}^6$ ,  $\text{Tp}^6\beta\text{-Th}_2\text{Tp}^6$ ,  $\text{Tp}^6\text{Fu}_2\text{Tp}^6$ ,  $\text{Tp}^6\text{PhTp}^6$ ,  $\text{Tp}^6\text{Ph}_2\text{Tp}^6$ ,  $\text{Tp}^6\text{TtTp}^6$ ,  $\text{Tp}^6\text{BtTp}^6$  in ethyl acetate and ethanol;  $\text{Tp}^6\text{Tt}_2\text{Tp}^6$ ,  $\text{Tp}^6\text{Dt}^6$  in toluene and light petroleum.

## 7. DFT

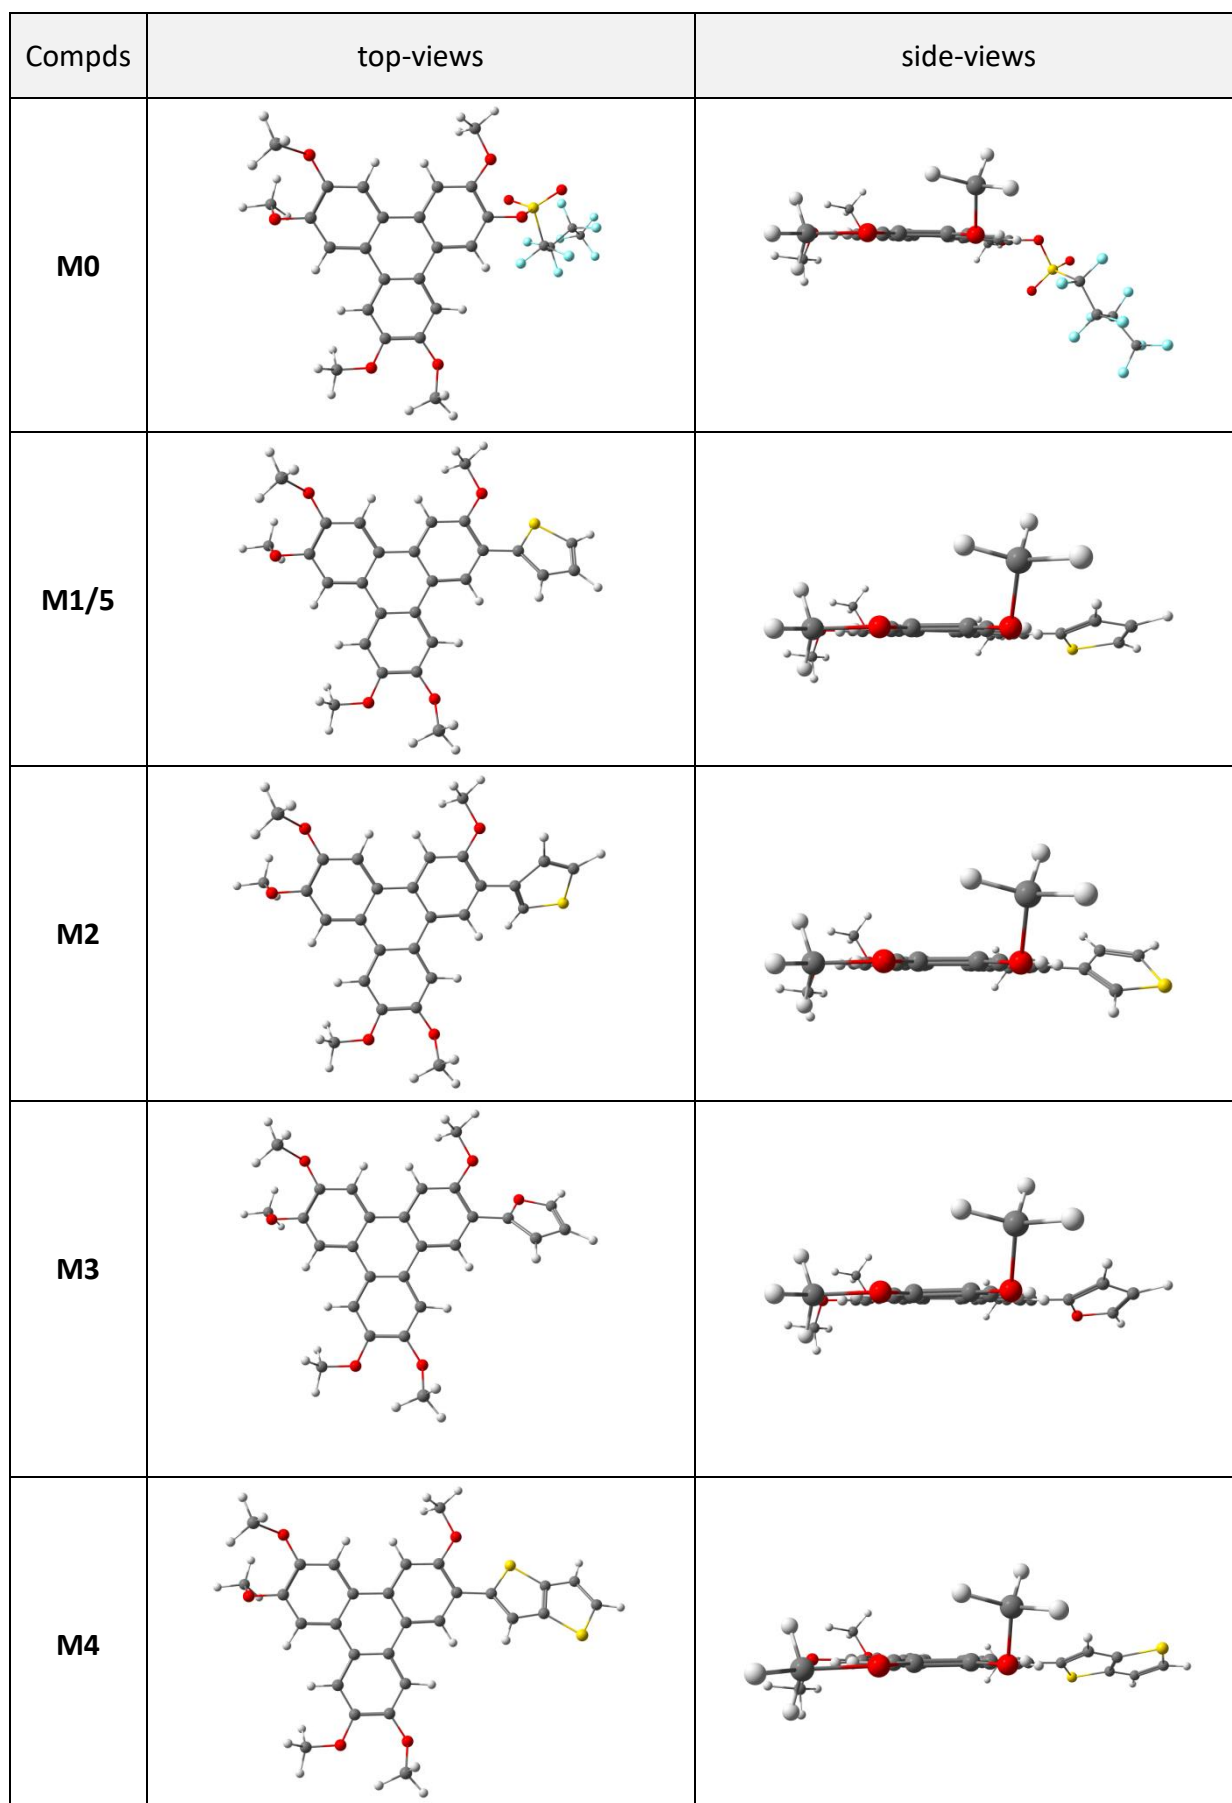

**Figure S55.** Calculated optimized molecular structures of the methoxy homologues of **M0-M5**.

**Table S3.** List of selected molecular orbital energies for the methoxy homologues of **M0-M5** and their HOMO-LUMO energy gaps ( $\Delta E$ ).

|             | HOMO-2<br>(eV) | HOMO-1<br>(eV) | HOMO<br>(eV) | $\Delta E$<br>(eV) | LUMO<br>(eV) | LUMO+1<br>(eV) | LUMO+2<br>(eV) |
|-------------|----------------|----------------|--------------|--------------------|--------------|----------------|----------------|
| <b>M0</b>   | -6.40          | -5.77          | -5.47        | 4.22               | -1.25        | -0.95          | -0.72          |
| <b>M1/5</b> | -5.95          | -5.33          | -5.15        | 3.98               | -1.17        | -0.75          | -0.45          |
| <b>M2</b>   | -6.01          | -5.40          | -5.19        | 4.19               | -1.00        | -0.74          | -0.43          |
| <b>M3</b>   | -5.90          | -5.31          | -5.10        | 4.06               | -1.04        | -0.73          | -0.41          |
| <b>M4</b>   | -5.85          | -5.33          | -5.09        | 3.76               | -1.33        | -0.78          | -0.50          |

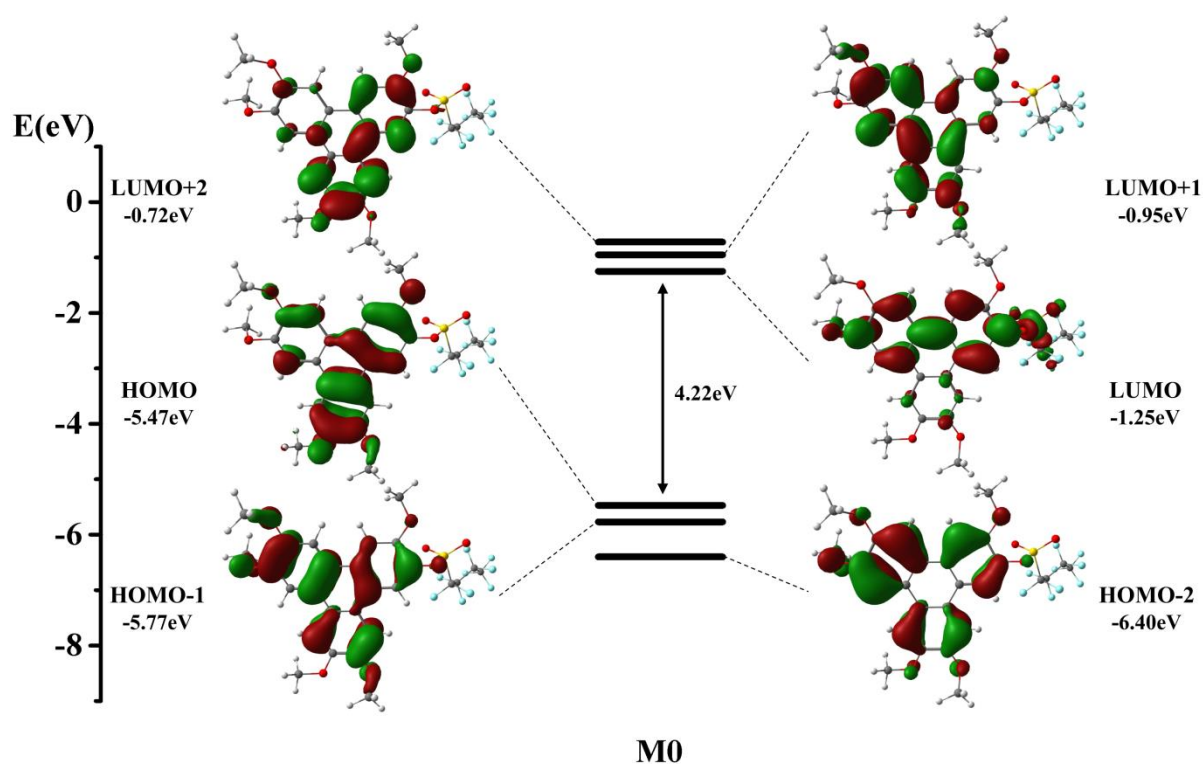



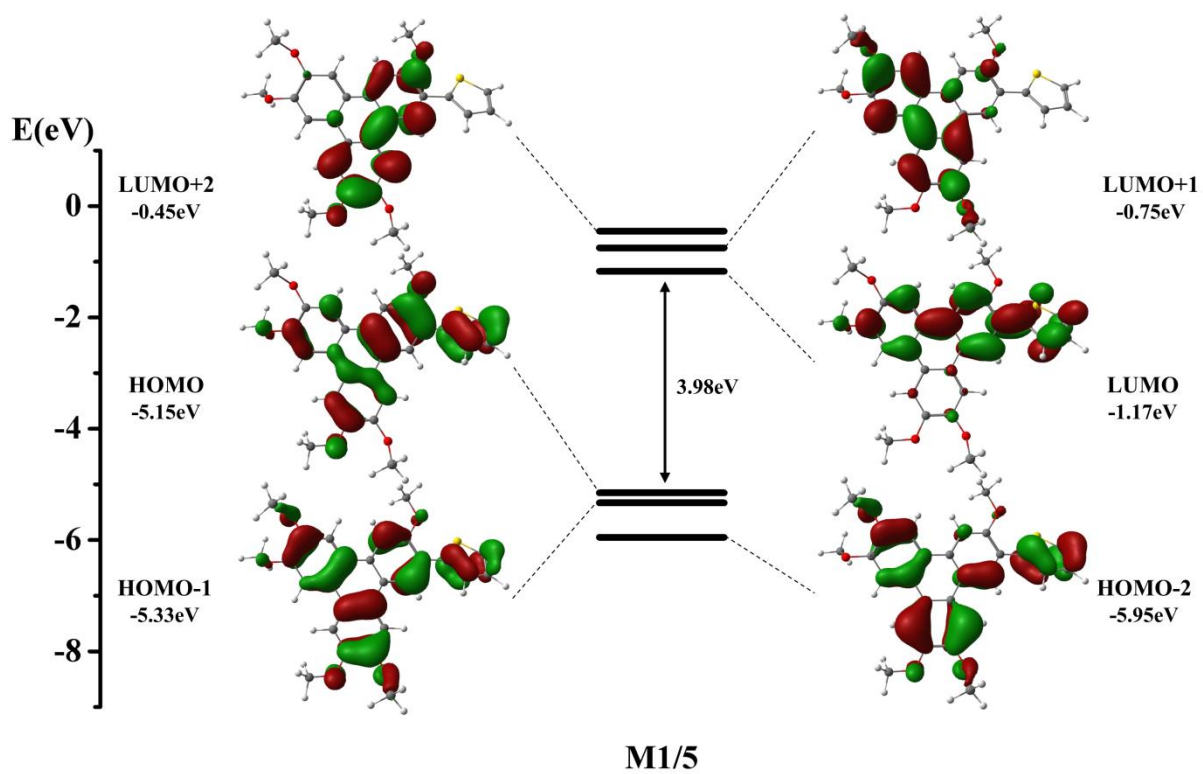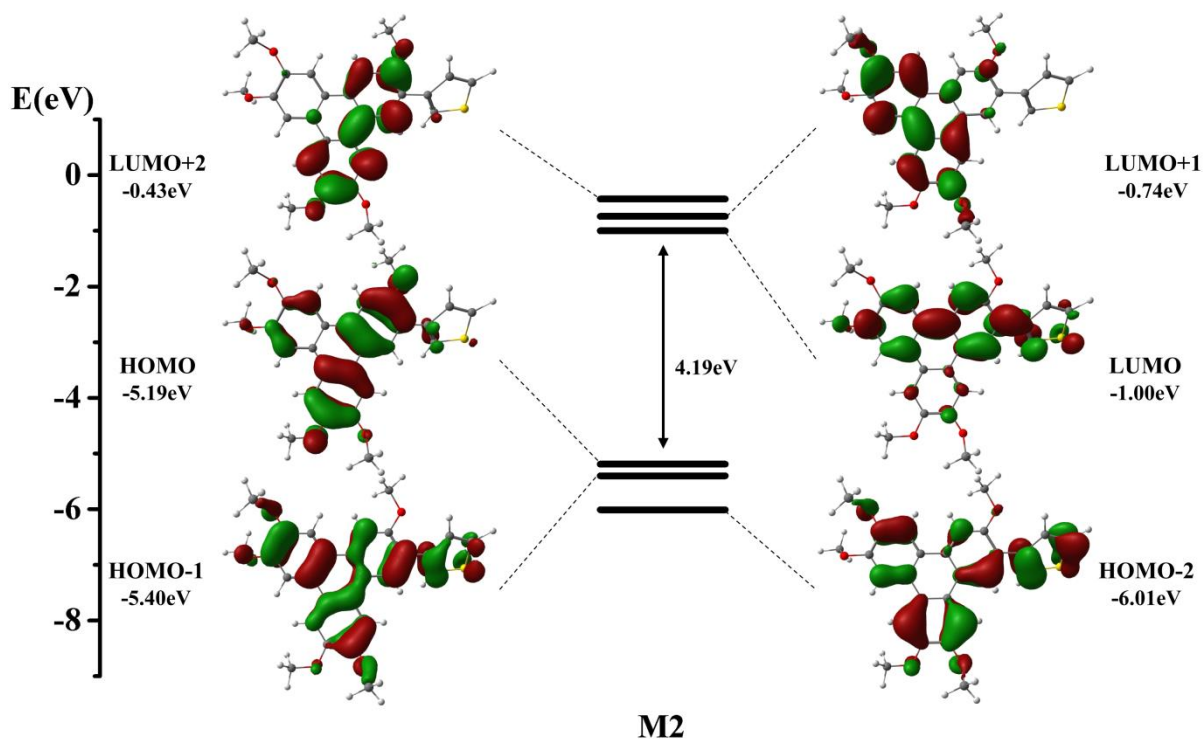

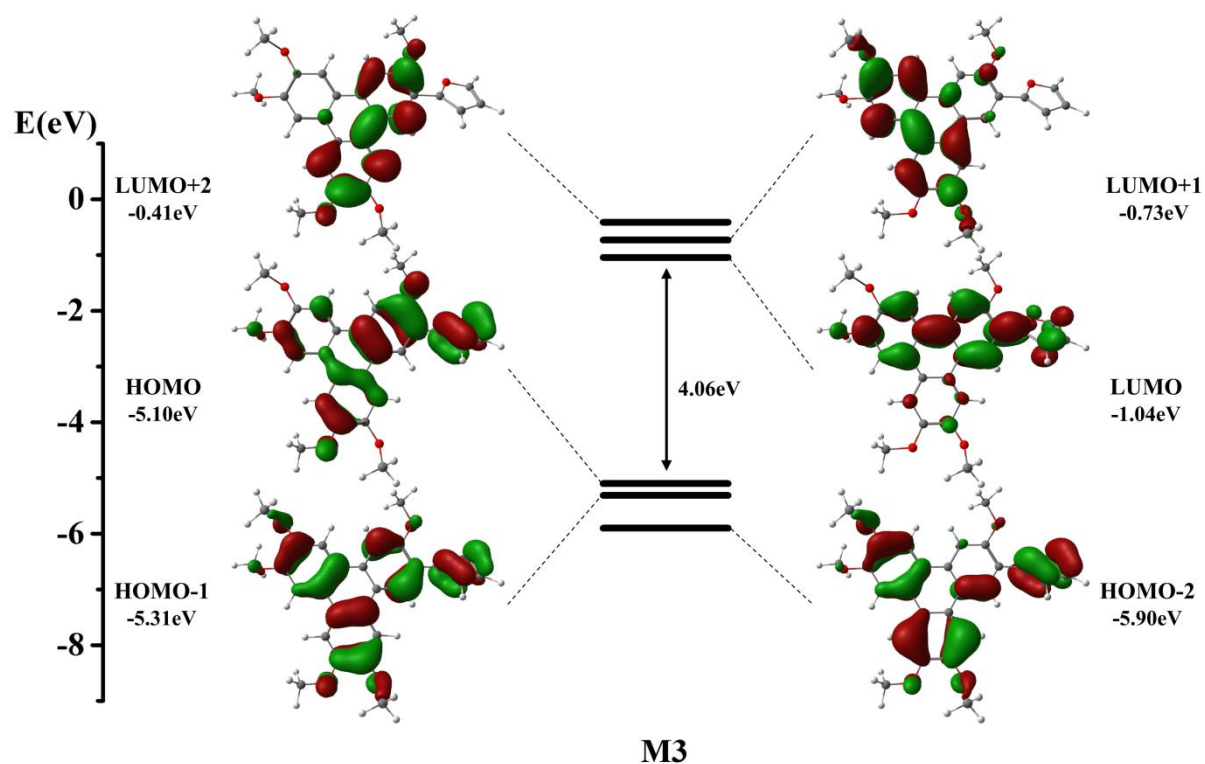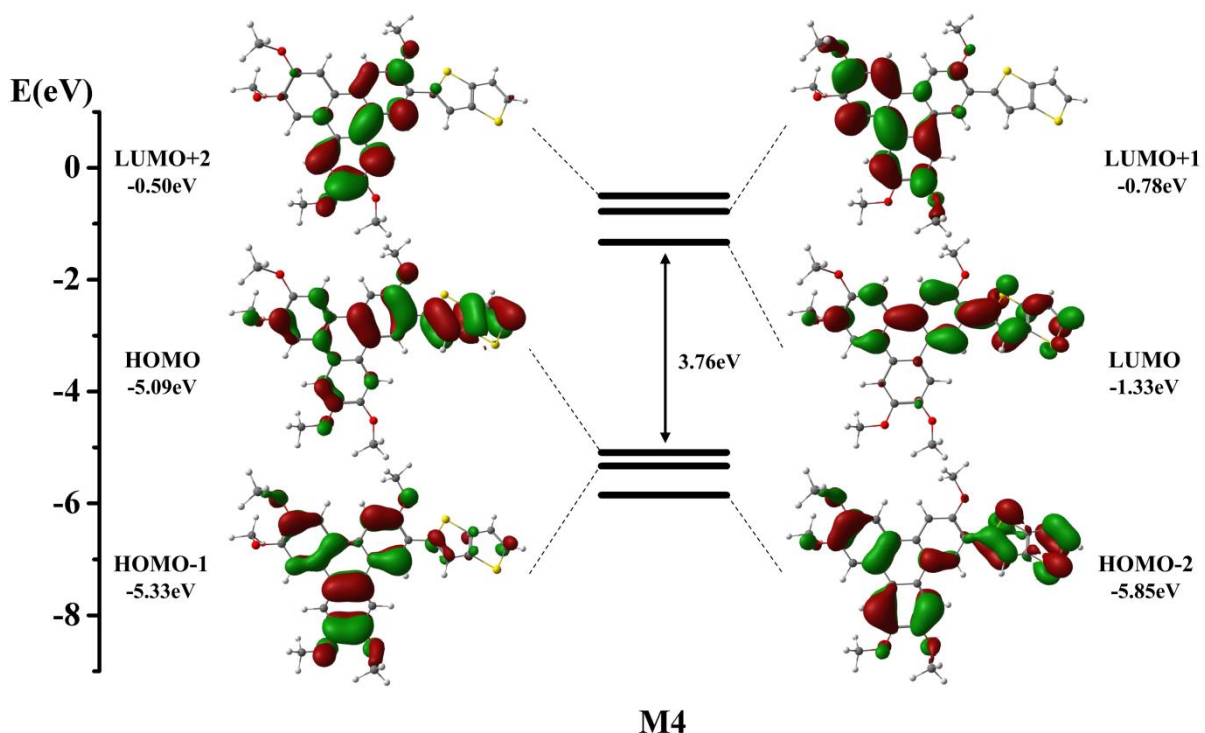

**Figure S56.** Partial molecular orbital diagram for the methoxy homologues of **M0-M5** with some selected isodensity frontier molecular orbital mainly involved in the electronic transitions. All the DFT energy values are given in electronvolts. The arrows are intended to highlight the HOMO-LUMO energy gaps.

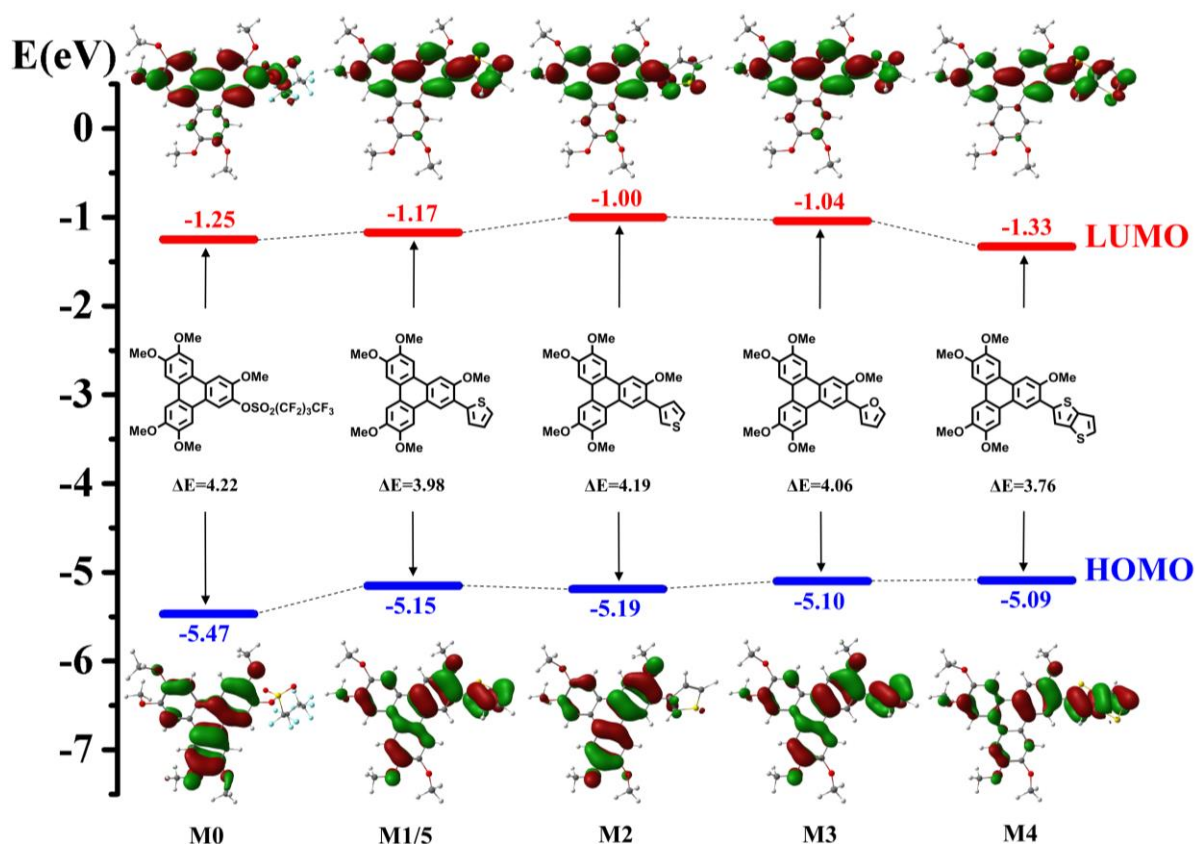

**Figure S57.** Comparison of HOMO-LUMO energy levels for the methoxy homologues of **M0-M5**.

**Table S4.** Selected calculated excitation energies ( $\Delta E$ ), oscillator strengths ( $f$ ), main orbital components, and assignment for the methoxy homologues of **M0-M5** in THF solution.<sup>a</sup>

| Compd.    | $\lambda_{exc}/nm$ | $\Delta E/eV$ | $f$                                                      | Transitions (Percentage Contribution)                                                 |
|-----------|--------------------|---------------|----------------------------------------------------------|---------------------------------------------------------------------------------------|
| <b>M0</b> | 341.7              | 3.63          | 0.0401                                                   | H-0 $\rightarrow$ L+0(+65%), H-1 $\rightarrow$ L+1(+25%)                              |
|           | 319.2              | 3.88          | 0.0102                                                   | H-1 $\rightarrow$ L+0(+50%)                                                           |
|           | 305.7              | 4.06          | 0.0159                                                   | H-0 $\rightarrow$ L+2(+49%), H-1 $\rightarrow$ L+0(+30%), H-1 $\rightarrow$ L+1(+26%) |
|           | 294.3              | 4.21          | 0.2736                                                   | H-0 $\rightarrow$ L+1(+33%), H-2 $\rightarrow$ L+0(+28%), H-1 $\rightarrow$ L+0(+27%) |
|           | 273.6              | 4.53          | 0.6569                                                   | H-1 $\rightarrow$ L+2(+34%), H-1 $\rightarrow$ L+0(+27%), H-0 $\rightarrow$ L+1(+26%) |
|           | 271.7              | 4.56          | 0.4261                                                   | H-1 $\rightarrow$ L+2(+43%), H-0 $\rightarrow$ L+2(+24%), H-0 $\rightarrow$ L+0(+21%) |
|           | 262.2              | 4.73          | 0.2838                                                   | H-2 $\rightarrow$ L+0(+57%), H-1 $\rightarrow$ L+2(+27%), H-1 $\rightarrow$ L+1(+17%) |
|           | 255.7              | 4.85          | 0.2454                                                   | H-0 $\rightarrow$ L+3(+56%), H-2 $\rightarrow$ L+1(+30%), H-1 $\rightarrow$ L+1(+20%) |
|           | 253.1              | 4.90          | 0.2327                                                   | H-2 $\rightarrow$ L+1(+45%), H-3 $\rightarrow$ L+0(+35%), H-1 $\rightarrow$ L+1(+12%) |
|           | 244.8              | 5.06          | 0.0039                                                   | H-2 $\rightarrow$ L+2(+46%), H-2 $\rightarrow$ L+1(+22%), H-4 $\rightarrow$ L+0(+18%) |
|           | 239.9              | 5.17          | 0.0448                                                   | H-3 $\rightarrow$ L+0(+45%), H-2 $\rightarrow$ L+2(+41%), H-0 $\rightarrow$ L+3(+11%) |
|           | 237.9              | 5.21          | 0.0395                                                   | H-1 $\rightarrow$ L+3(+62%), H-2 $\rightarrow$ L+2(+18%)                              |
|           | 234.1              | 5.30          | 0.0502                                                   | H-4 $\rightarrow$ L+0(+63%), H-3 $\rightarrow$ L+1(+11%)                              |
|           | 230.9              | 5.37          | 0.0675                                                   | H-3 $\rightarrow$ L+1(+61%), H-2 $\rightarrow$ L+2(+17%), H-1 $\rightarrow$ L+3(+13%) |
|           | 227.9              | 5.44          | 0.0526                                                   | H-5 $\rightarrow$ L+0(+49%), H-4 $\rightarrow$ L+1(+35%), H-4 $\rightarrow$ L+0(+11%) |
| 226.4     | 5.48               | 0.0083        | H-4 $\rightarrow$ L+1(+41%), H-0 $\rightarrow$ L+5(+12%) |                                                                                       |

|             |       |      |        |                                             |
|-------------|-------|------|--------|---------------------------------------------|
|             | 222.3 | 5.58 | 0.0244 | H-3→L+2(+51%), H-0→L+4(+20%), H-5→L+1(+11%) |
|             | 220.9 | 5.61 | 0.0442 | H-5→L+1(+40%), H-6→L+0(+27%), H-0→L+5(+25%) |
|             | 220.4 | 5.63 | 0.0511 | H-5→L+1(+37%), H-7→L+0(+14%), H-3→L+1(+12%) |
|             | 219.0 | 5.66 | 0.0195 | H-0→L+5(+40%), H-0→L+4(+15%)                |
|             | 218.4 | 5.68 | 0.0011 | H-0→L+4(+63%), H-0→L+6(+18%), H-6→L+0(+17%) |
|             | 216.2 | 5.74 | 0.0434 | H-7→L+0(+38%), H-7→L+1(+19%), H-6→L+1(+19%) |
|             | 213.9 | 5.80 | 0.0426 | H-2→L+3(+61%), H-6→L+1(+18%), H-1→L+5(+18%) |
|             | 212.6 | 5.83 | 0.0339 | H-1→L+5(+35%), H-1→L+7(+12%)                |
|             | 211.7 | 5.86 | 0.0097 | H-4→L+2(+33%), H-6→L+1(+31%), H-1→L+6(+22%) |
|             | 208.6 | 5.95 | 0.0099 | H-6→L+1(+40%), H-1→L+4(+18%), H-5→L+1(+13%) |
|             | 208.0 | 5.96 | 0.0023 | H-0→L+7(+58%), H-0→L+6(+11%)                |
|             | 207.4 | 5.98 | 0.0028 | H-1→L+4(+60%), H-0→L+7(+25%), H-7→L+1(+10%) |
|             | 205.2 | 6.04 | 0.0071 | H-1→L+6(+42%), H-6→L+2(+26%), H-7→L+2(+20%) |
|             | 203.8 | 6.08 | 0.0272 | H-7→L+1(+34%), H-1→L+6(+21%), H-7→L+2(+20%) |
| <b>M1/5</b> | 356.7 | 3.48 | 0.0986 | H-0→L+0(+55%), H-0→L+1(+17%), H-1→L+1(+16%) |
|             | 338.2 | 3.67 | 0.3264 | H-1→L+0(+51%), H-0→L+0(+37%), H-1→L+1(+11%) |
|             | 316.9 | 3.91 | 0.1035 | H-0→L+1(+56%), H-1→L+0(+29%), H-0→L+2(+25%) |
|             | 304.5 | 4.07 | 0.1969 | H-1→L+1(+49%), H-0→L+2(+33%), H-1→L+2(+22%) |
|             | 292.5 | 4.24 | 0.4972 | H-2→L+0(+53%), H-1→L+1(+27%)                |
|             | 289.9 | 4.28 | 0.2971 | H-0→L+2(+46%), H-2→L+1(+26%), H-0→L+0(+10%) |
|             | 280.0 | 4.43 | 0.0503 | H-1→L+2(+47%), H-2→L+0(+36%), H-0→L+3(+17%) |
|             | 268.3 | 4.62 | 0.0833 | H-3→L+0(+52%), H-0→L+3(+38%), H-2→L+1(+15%) |
|             | 259.4 | 4.78 | 0.1730 | H-0→L+3(+44%), H-5→L+0(+12%), H-0→L+2(+12%) |
|             | 256.4 | 4.83 | 0.0127 | H-4→L+0(+68%)                               |
|             | 255.1 | 4.86 | 0.5475 | H-2→L+1(+57%), H-1→L+2(+19%), H-1→L+1(+12%) |
|             | 253.4 | 4.89 | 0.0207 | H-3→L+1(+36%), H-5→L+0(+36%), H-1→L+3(+30%) |
|             | 249.1 | 4.98 | 0.0685 | H-2→L+2(+59%), H-5→L+0(+26%), H-5→L+1(+13%) |
|             | 244.0 | 5.08 | 0.0063 | H-1→L+3(+42%), H-0→L+3(+19%), H-6→L+0(+19%) |
|             | 241.0 | 5.14 | 0.0290 | H-5→L+0(+39%), H-6→L+0(+25%), H-7→L+0(+11%) |
|             | 235.8 | 5.26 | 0.0010 | H-6→L+0(+53%), H-3→L+1(+24%)                |
|             | 233.6 | 5.31 | 0.0494 | H-3→L+2(+58%), H-6→L+0(+21%), H-0→L+4(+11%) |
|             | 231.7 | 5.35 | 0.0004 | H-4→L+1(+67%)                               |
|             | 229.5 | 5.40 | 0.0362 | H-5→L+1(+54%), H-3→L+2(+21%), H-7→L+1(+15%) |
|             | 227.3 | 5.46 | 0.0221 | H-7→L+0(+60%), H-2→L+3(+22%), H-1→L+4(+11%) |
|             | 225.4 | 5.50 | 0.0232 | H-6→L+1(+46%), H-1→L+4(+20%), H-0→L+5(+12%) |
|             | 223.4 | 5.55 | 0.0153 | H-4→L+2(+47%), H-4→L+1(+13%), H-8→L+0(+10%) |
|             | 223.0 | 5.56 | 0.0181 | H-4→L+2(+47%), H-0→L+5(+34%), H-4→L+1(+16%) |
|             | 221.9 | 5.59 | 0.0287 | H-2→L+3(+54%)                               |
|             | 220.8 | 5.62 | 0.0402 | H-0→L+6(+42%), H-1→L+6(+17%), H-2→L+3(+16%) |
|             | 218.7 | 5.67 | 0.0167 | H-7→L+1(+44%), H-0→L+5(+20%)                |
|             | 217.3 | 5.71 | 0.0591 | H-5→L+2(+41%), H-7→L+1(+30%), H-8→L+0(+24%) |
|             | 216.6 | 5.72 | 0.0021 | H-8→L+0(+45%), H-9→L+0(+27%), H-8→L+1(+23%) |
|             | 214.3 | 5.78 | 0.0131 | H-1→L+5(+48%), H-9→L+0(+19%), H-5→L+2(+17%) |
|             | 214.0 | 5.79 | 0.0800 | H-7→L+1(+32%), H-0→L+4(+21%), H-6→L+1(+21%) |

|           |       |        |                                             |                                             |
|-----------|-------|--------|---------------------------------------------|---------------------------------------------|
| <b>M2</b> | 344.5 | 3.60   | 0.0503                                      | H-0→L+0(+60%), H-1→L+1(+24%), H-0→L+1(+13%) |
|           | 325.3 | 3.81   | 0.0615                                      | H-0→L+1(+49%)                               |
|           | 308.8 | 4.02   | 0.1127                                      | H-1→L+0(+42%), H-0→L+2(+37%), H-0→L+1(+36%) |
|           | 297.8 | 4.16   | 0.2643                                      | H-1→L+1(+44%), H-1→L+2(+29%), H-0→L+2(+24%) |
|           | 283.0 | 4.38   | 0.6194                                      | H-0→L+2(+44%)                               |
|           | 278.9 | 4.45   | 0.5019                                      | H-1→L+2(+39%), H-2→L+0(+29%), H-0→L+0(+25%) |
|           | 271.9 | 4.56   | 0.0194                                      | H-2→L+0(+52%), H-0→L+3(+19%)                |
|           | 266.0 | 4.66   | 0.0115                                      | H-0→L+3(+49%), H-3→L+0(+41%), H-1→L+2(+16%) |
|           | 260.4 | 4.76   | 0.1872                                      | H-0→L+3(+44%)                               |
|           | 255.5 | 4.85   | 0.4318                                      | H-2→L+1(+50%), H-4→L+0(+34%), H-0→L+2(+22%) |
|           | 251.3 | 4.94   | 0.1121                                      | H-4→L+0(+51%), H-1→L+3(+31%), H-3→L+1(+10%) |
|           | 248.4 | 4.99   | 0.0375                                      | H-3→L+1(+36%), H-1→L+3(+28%), H-2→L+1(+22%) |
|           | 246.2 | 5.04   | 0.0699                                      | H-2→L+2(+52%), H-1→L+3(+31%), H-5→L+0(+18%) |
|           | 243.5 | 5.09   | 0.0124                                      | H-3→L+1(+38%), H-5→L+0(+26%), H-2→L+2(+26%) |
|           | 237.4 | 5.22   | 0.0203                                      | H-5→L+0(+47%), H-4→L+1(+25%), H-3→L+2(+17%) |
|           | 236.4 | 5.24   | 0.0018                                      | H-3→L+2(+41%), H-4→L+1(+40%), H-2→L+2(+21%) |
|           | 233.0 | 5.32   | 0.0231                                      | H-3→L+2(+47%), H-4→L+2(+15%), H-3→L+1(+12%) |
|           | 231.7 | 5.35   | 0.0168                                      | H-6→L+0(+46%), H-3→L+2(+18%), H-3→L+1(+15%) |
|           | 228.5 | 5.43   | 0.0481                                      | H-5→L+1(+41%), H-6→L+0(+40%), H-0→L+4(+20%) |
|           | 226.1 | 5.48   | 0.0329                                      | H-0→L+4(+46%), H-4→L+2(+17%), H-2→L+2(+10%) |
|           | 225.1 | 5.51   | 0.0356                                      | H-4→L+2(+50%), H-7→L+1(+17%), H-5→L+1(+16%) |
|           | 224.4 | 5.52   | 0.0051                                      | H-4→L+2(+38%), H-0→L+5(+32%), H-6→L+1(+31%) |
|           | 223.3 | 5.55   | 0.0036                                      | H-7→L+0(+44%), H-3→L+3(+14%)                |
|           | 221.1 | 5.61   | 0.0052                                      | H-2→L+3(+45%), H-7→L+0(+38%), H-1→L+6(+14%) |
|           | 220.9 | 5.61   | 0.0247                                      | H-1→L+4(+35%), H-7→L+0(+18%), H-5→L+1(+14%) |
|           | 217.7 | 5.70   | 0.0306                                      | H-5→L+2(+36%), H-6→L+1(+23%), H-0→L+6(+21%) |
| 217.3     | 5.70  | 0.0051 | H-1→L+4(+42%), H-0→L+6(+31%), H-1→L+6(+22%) |                                             |
| 216.8     | 5.72  | 0.0433 | H-7→L+1(+49%), H-5→L+2(+35%), H-1→L+5(+17%) |                                             |
| 215.0     | 5.77  | 0.0072 | H-8→L+0(+35%), H-8→L+1(+29%), H-9→L+0(+25%) |                                             |
| 212.1     | 5.84  | 0.1039 | H-8→L+0(+43%), H-5→L+2(+27%), H-1→L+5(+17%) |                                             |
| <b>M3</b> | 350.7 | 3.54   | 0.0841                                      | H-0→L+0(+54%), H-0→L+1(+20%), H-1→L+1(+18%) |
|           | 332.9 | 3.72   | 0.2012                                      | H-1→L+0(+44%), H-0→L+0(+36%), H-1→L+1(+14%) |
|           | 315.6 | 3.93   | 0.1316                                      | H-0→L+1(+49%), H-1→L+0(+37%), H-0→L+2(+30%) |
|           | 302.7 | 4.10   | 0.2734                                      | H-1→L+1(+49%), H-0→L+2(+32%), H-1→L+2(+24%) |
|           | 291.0 | 4.26   | 0.3387                                      | H-0→L+2(+45%), H-2→L+1(+25%), H-2→L+0(+21%) |
|           | 290.0 | 4.28   | 0.3594                                      | H-2→L+0(+47%), H-1→L+1(+34%)                |
|           | 277.8 | 4.46   | 0.0515                                      | H-1→L+2(+45%), H-2→L+0(+39%), H-0→L+1(+14%) |
|           | 262.5 | 4.72   | 0.4073                                      | H-3→L+0(+50%), H-2→L+1(+31%), H-1→L+2(+15%) |
|           | 255.3 | 4.86   | 0.5326                                      | H-2→L+1(+50%), H-1→L+2(+19%), H-0→L+3(+13%) |
|           | 251.9 | 4.92   | 0.0157                                      | H-3→L+1(+47%), H-4→L+0(+11%)                |
|           | 249.6 | 4.97   | 0.0776                                      | H-4→L+0(+43%), H-2→L+2(+39%), H-3→L+1(+25%) |
|           | 245.2 | 5.06   | 0.0156                                      | H-0→L+3(+48%), H-2→L+2(+29%), H-3→L+1(+18%) |
|           | 239.1 | 5.19   | 0.0374                                      | H-4→L+0(+41%), H-0→L+3(+29%), H-5→L+0(+14%) |
|           | 235.4 | 5.27   | 0.0340                                      | H-3→L+2(+64%), H-4→L+0(+13%)                |

|           |       |      |        |                                             |
|-----------|-------|------|--------|---------------------------------------------|
|           | 234.1 | 5.30 | 0.0101 | H-1→L+3(+42%), H-0→L+3(+24%), H-0→L+4(+18%) |
|           | 232.8 | 5.33 | 0.0459 | H-5→L+0(+56%), H-3→L+2(+12%), H-0→L+4(+11%) |
|           | 228.7 | 5.42 | 0.0173 | H-4→L+1(+46%), H-1→L+3(+27%), H-5→L+0(+19%) |
|           | 225.4 | 5.50 | 0.0256 | H-5→L+1(+46%), H-1→L+4(+23%)                |
|           | 224.6 | 5.52 | 0.0108 | H-6→L+0(+59%), H-4→L+1(+14%), H-0→L+4(+11%) |
|           | 221.6 | 5.60 | 0.0284 | H-7→L+0(+41%), H-4→L+2(+32%), H-0→L+4(+23%) |
|           | 219.3 | 5.65 | 0.0227 | H-7→L+0(+31%), H-6→L+1(+31%), H-6→L+0(+19%) |
|           | 218.1 | 5.68 | 0.0221 | H-4→L+2(+37%), H-6→L+1(+36%)                |
|           | 215.6 | 5.75 | 0.0349 | H-8→L+0(+39%), H-8→L+1(+25%), H-5→L+1(+21%) |
|           | 214.6 | 5.78 | 0.0372 | H-0→L+5(+36%), H-4→L+2(+29%), H-7→L+0(+20%) |
|           | 212.9 | 5.82 | 0.0184 | H-1→L+4(+31%), H-2→L+3(+25%), H-0→L+4(+25%) |
|           | 211.6 | 5.86 | 0.1292 | H-2→L+3(+49%), H-8→L+0(+28%), H-1→L+5(+21%) |
|           | 209.7 | 5.91 | 0.0032 | H-1→L+4(+36%), H-8→L+0(+36%), H-1→L+5(+11%) |
|           | 207.3 | 5.98 | 0.0222 | H-5→L+2(+50%), H-7→L+1(+15%), H-8→L+2(+12%) |
|           | 206.5 | 6.00 | 0.0157 | H-1→L+5(+45%), H-8→L+1(+21%)                |
|           | 205.3 | 6.04 | 0.0101 | H-1→L+5(+34%), H-9→L+0(+33%), H-8→L+0(+15%) |
| <b>M4</b> | 368.4 | 3.37 | 0.3877 | H-0→L+0(+58%), H-0→L+1(+14%)                |
|           | 354.5 | 3.50 | 0.4581 | H-1→L+0(+56%), H-0→L+0(+37%)                |
|           | 323.1 | 3.84 | 0.0565 | H-0→L+1(+59%), H-1→L+0(+21%), H-0→L+2(+15%) |
|           | 309.0 | 4.01 | 0.1875 | H-1→L+1(+49%), H-0→L+2(+43%), H-4→L+0(+15%) |
|           | 307.8 | 4.03 | 0.1412 | H-2→L+0(+60%), H-1→L+1(+17%), H-0→L+1(+14%) |
|           | 297.9 | 4.16 | 0.1307 | H-0→L+2(+39%), H-3→L+0(+23%), H-2→L+1(+20%) |
|           | 294.3 | 4.21 | 0.1295 | H-3→L+0(+62%), H-1→L+2(+15%), H-2→L+0(+11%) |
|           | 290.2 | 4.27 | 0.1346 | H-0→L+3(+46%), H-2→L+1(+16%), H-3→L+0(+12%) |
|           | 282.3 | 4.39 | 0.0086 | H-4→L+0(+46%), H-2→L+1(+19%)                |
|           | 271.1 | 4.57 | 0.1184 | H-1→L+3(+61%), H-1→L+1(+12%)                |
|           | 263.6 | 4.70 | 0.1284 | H-4→L+0(+42%), H-0→L+3(+25%)                |
|           | 259.7 | 4.77 | 0.4490 | H-2→L+1(+48%), H-1→L+2(+30%), H-1→L+3(+25%) |
|           | 255.8 | 4.85 | 0.1139 | H-3→L+1(+53%), H-4→L+1(+13%), H-4→L+0(+12%) |
|           | 254.5 | 4.87 | 0.2063 | H-2→L+2(+50%), H-5→L+0(+32%), H-3→L+1(+23%) |
|           | 253.7 | 4.89 | 0.0104 | H-5→L+0(+40%), H-4→L+1(+28%), H-0→L+3(+15%) |
|           | 248.7 | 4.99 | 0.0365 | H-4→L+1(+42%), H-3→L+2(+23%), H-2→L+2(+11%) |
|           | 247.4 | 5.01 | 0.0011 | H-0→L+5(+64%), H-1→L+5(+16%), H-0→L+4(+15%) |
|           | 244.8 | 5.07 | 0.0195 | H-3→L+2(+63%), H-2→L+3(+16%), H-3→L+1(+13%) |
|           | 240.5 | 5.15 | 0.0053 | H-6→L+0(+56%), H-4→L+1(+13%)                |
|           | 239.3 | 5.18 | 0.0198 | H-2→L+3(+43%), H-4→L+1(+29%), H-0→L+4(+13%) |
|           | 237.6 | 5.22 | 0.0230 | H-0→L+4(+49%), H-4→L+2(+20%)                |
|           | 236.6 | 5.24 | 0.1287 | H-4→L+2(+51%), H-3→L+3(+30%), H-6→L+0(+21%) |
|           | 234.8 | 5.28 | 0.0399 | H-3→L+3(+58%), H-5→L+1(+15%), H-0→L+4(+14%) |
|           | 233.1 | 5.32 | 0.0084 | H-0→L+7(+51%), H-1→L+7(+11%)                |
|           | 231.0 | 5.37 | 0.0439 | H-5→L+1(+46%), H-8→L+0(+32%), H-4→L+2(+18%) |
|           | 230.3 | 5.38 | 0.0239 | H-8→L+0(+38%), H-1→L+4(+16%), H-3→L+3(+11%) |
|           | 226.0 | 5.49 | 0.0133 | H-6→L+1(+43%), H-1→L+6(+28%), H-1→L+4(+13%) |
|           | 225.2 | 5.51 | 0.0053 | H-1→L+4(+39%), H-0→L+6(+25%), H-5→L+1(+21%) |

|                                                     |       |      |        |                                             |
|-----------------------------------------------------|-------|------|--------|---------------------------------------------|
|                                                     | 223.1 | 5.56 | 0.0430 | H-6→L+1(+26%), H-8→L+0(+25%), H-0→L+6(+22%) |
|                                                     | 222.3 | 5.58 | 0.0105 | H-3→L+5(+54%), H-2→L+5(+28%), H-3→L+4(+13%) |
| ³H = HOMO, L = LUMO, H-n = HOMO-n and L+n = LUMO+n. |       |      |        |                                             |

| Compounds                                           | top-views                                                                           | side-views                                                                           |
|-----------------------------------------------------|-------------------------------------------------------------------------------------|--------------------------------------------------------------------------------------|
| <b>Tp<sup>1</sup>Th<sub>2</sub>Tp<sup>1</sup></b>   | 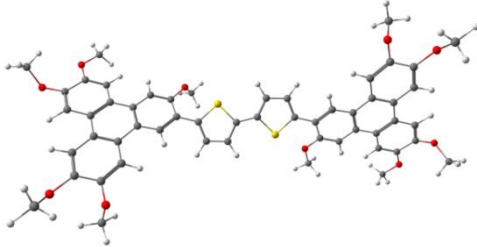   |    |
| <b>Tp<sup>1</sup>β-Th<sub>2</sub>Tp<sup>1</sup></b> |   |   |
| <b>Tp<sup>1</sup>Fu<sub>2</sub>Tp<sup>1</sup></b>   |  |  |
| <b>Tp<sup>1</sup>Tt<sub>2</sub>Tp<sup>1</sup></b>   |  |  |
| <b>Tp<sup>1</sup>T<sup>1</sup></b>                  |  |  |

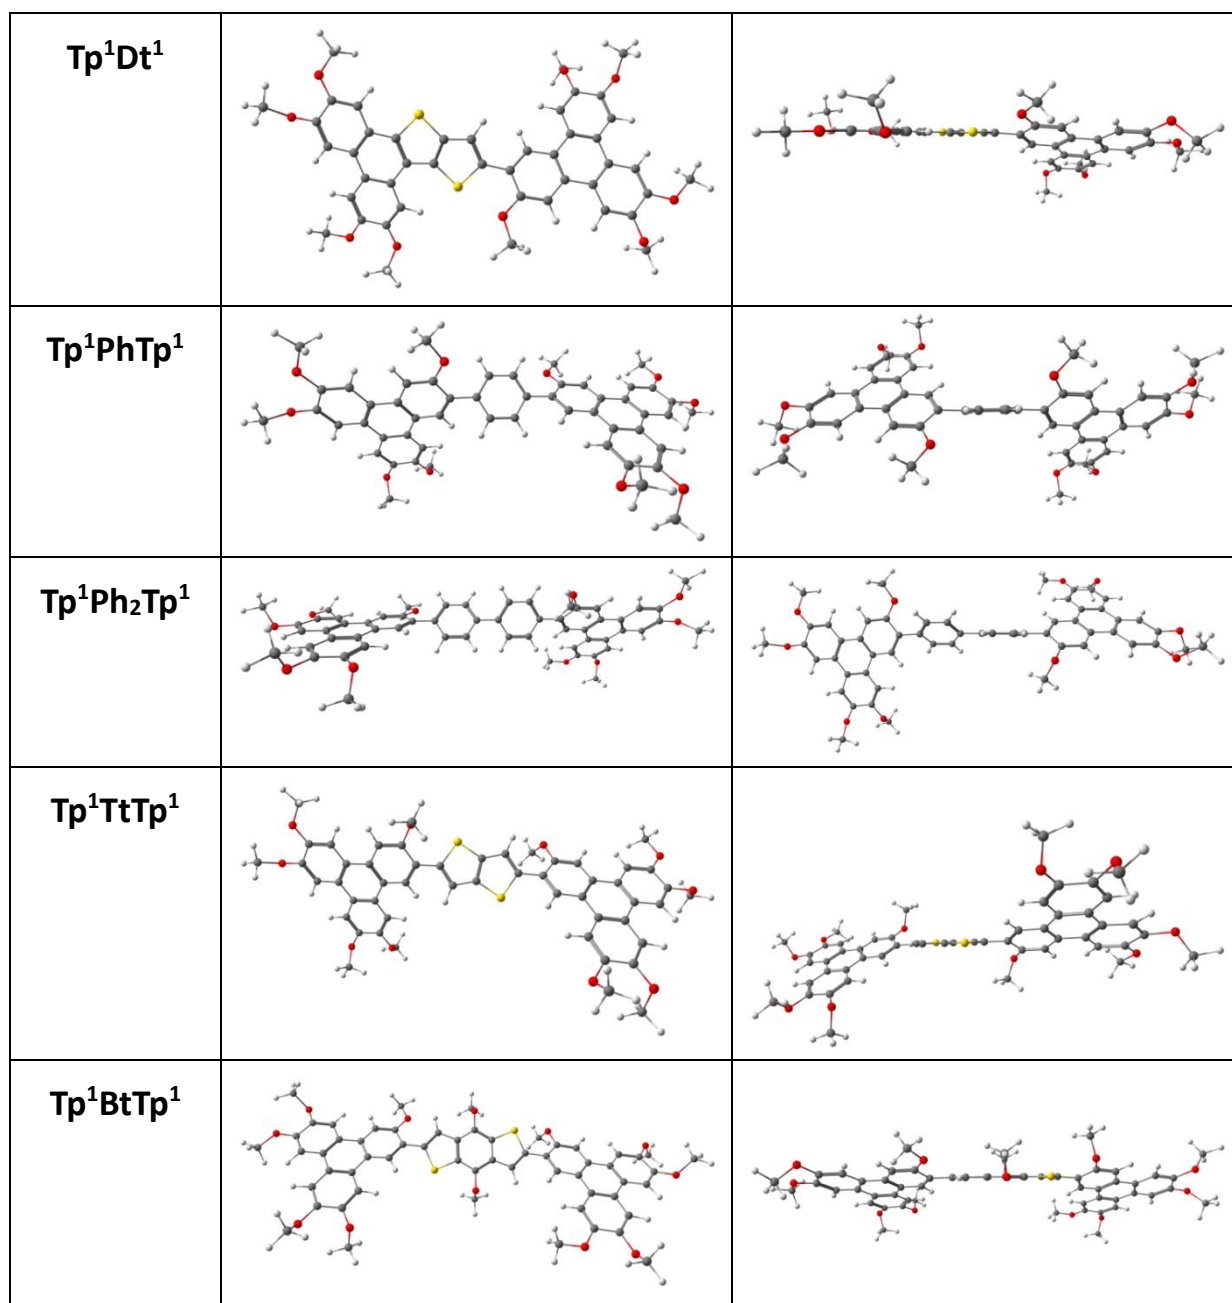

**Figure S58.** DFT calculated optimized molecular structures of the methoxy homologues of the dimeric compounds.



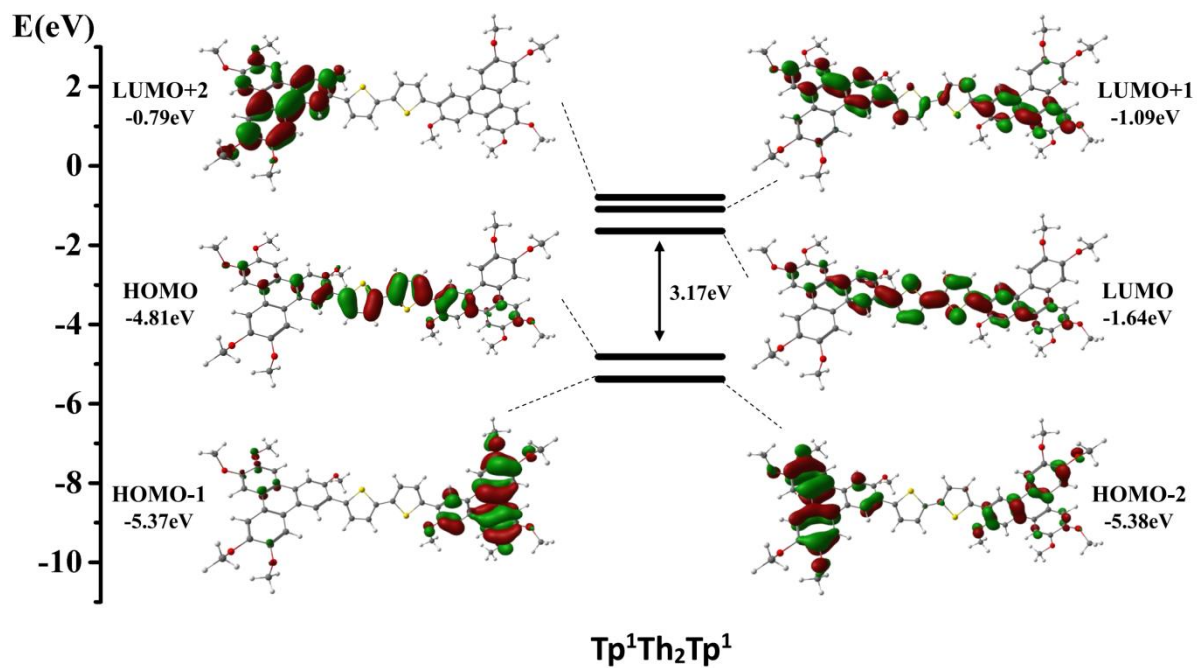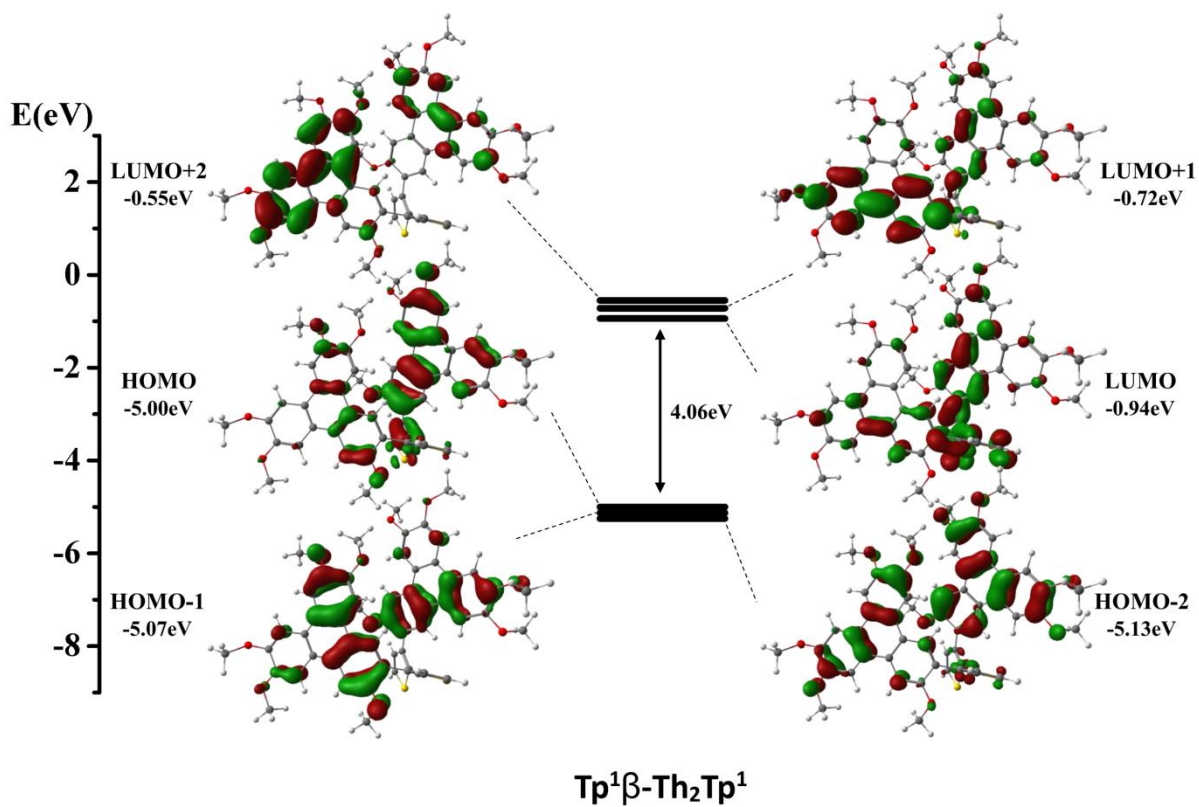

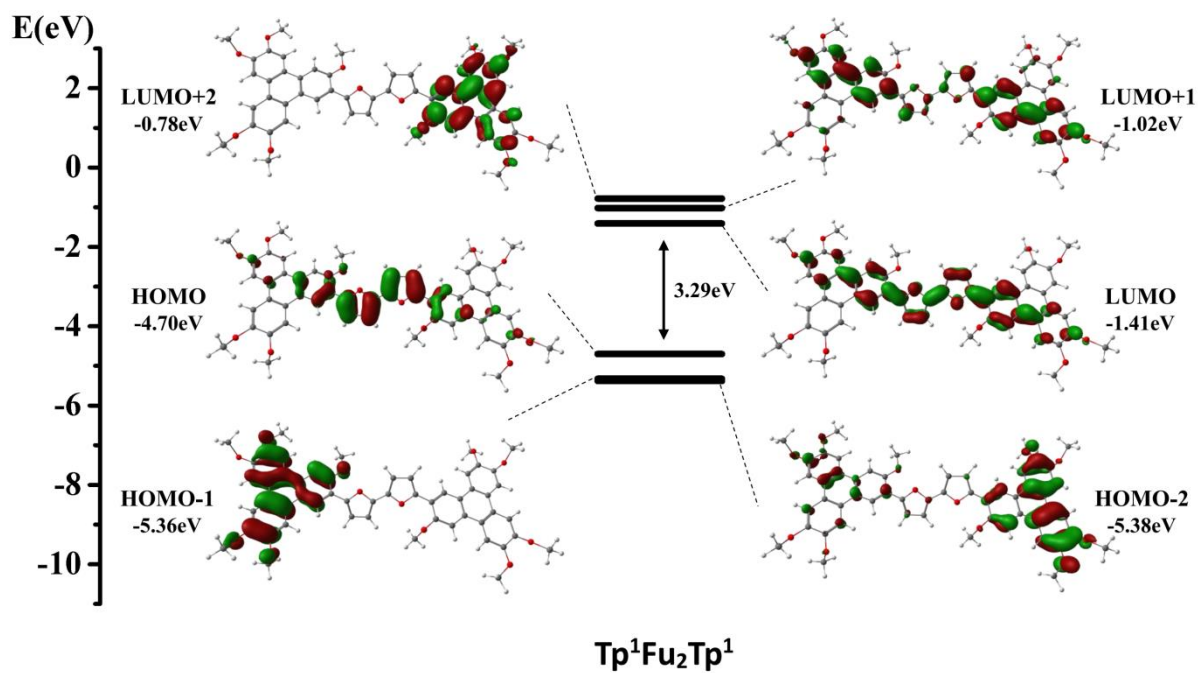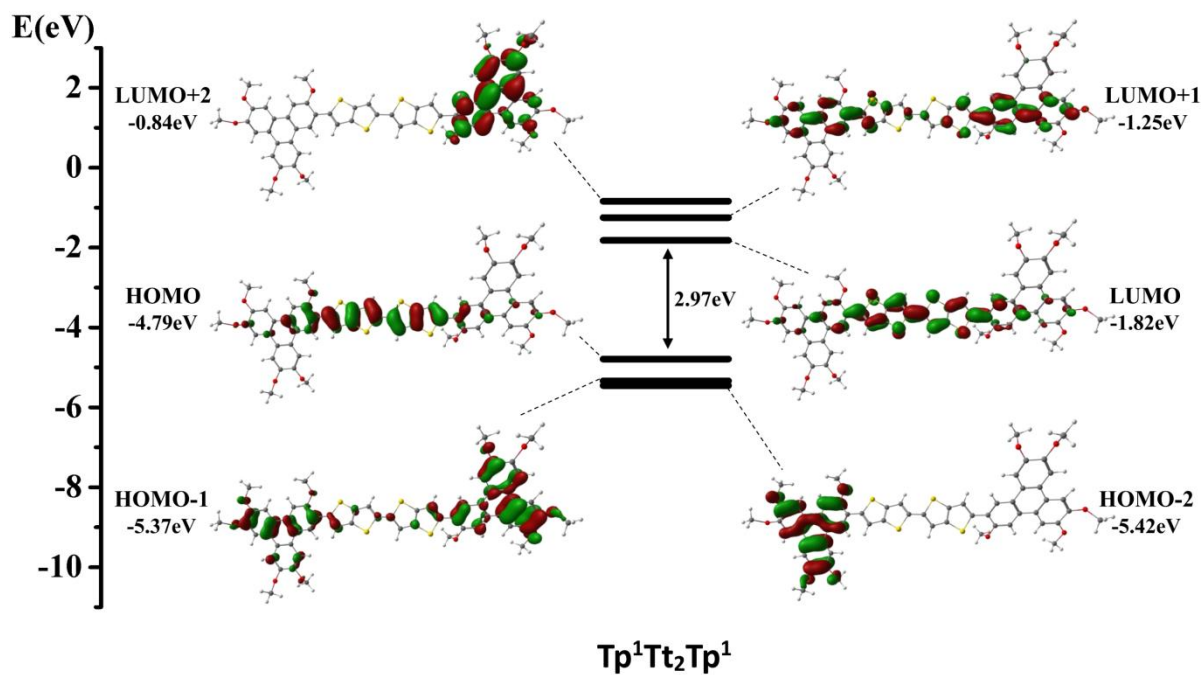

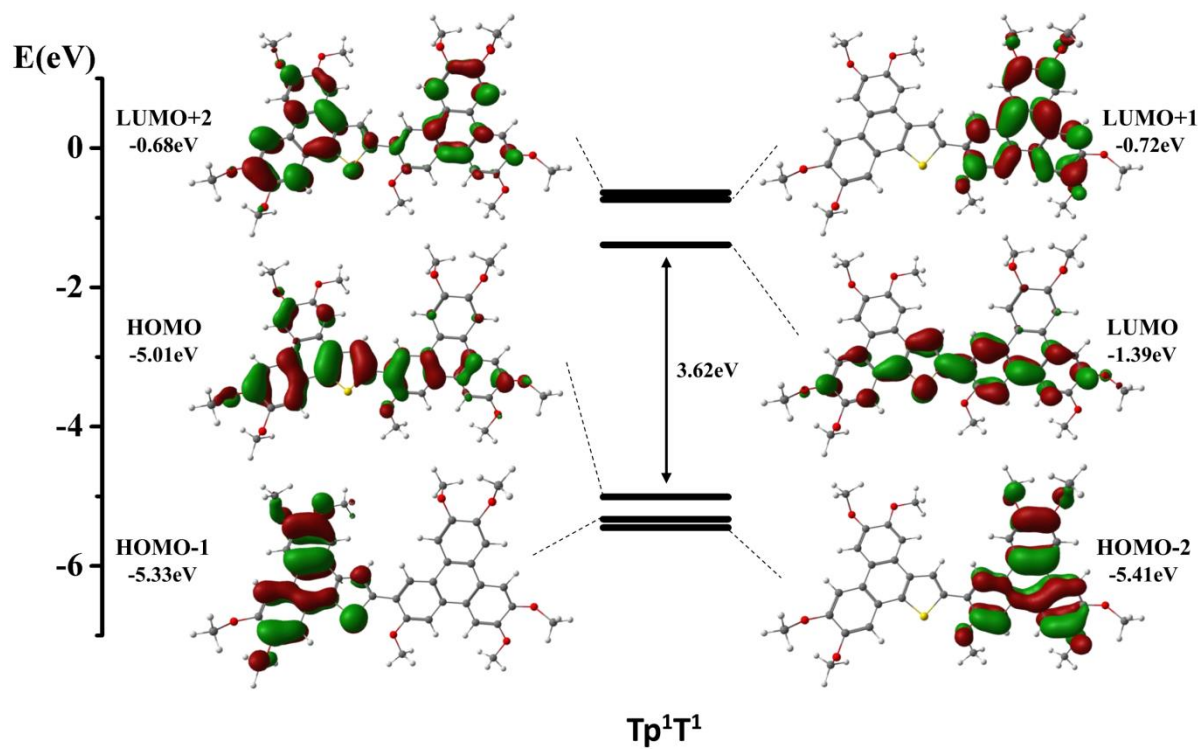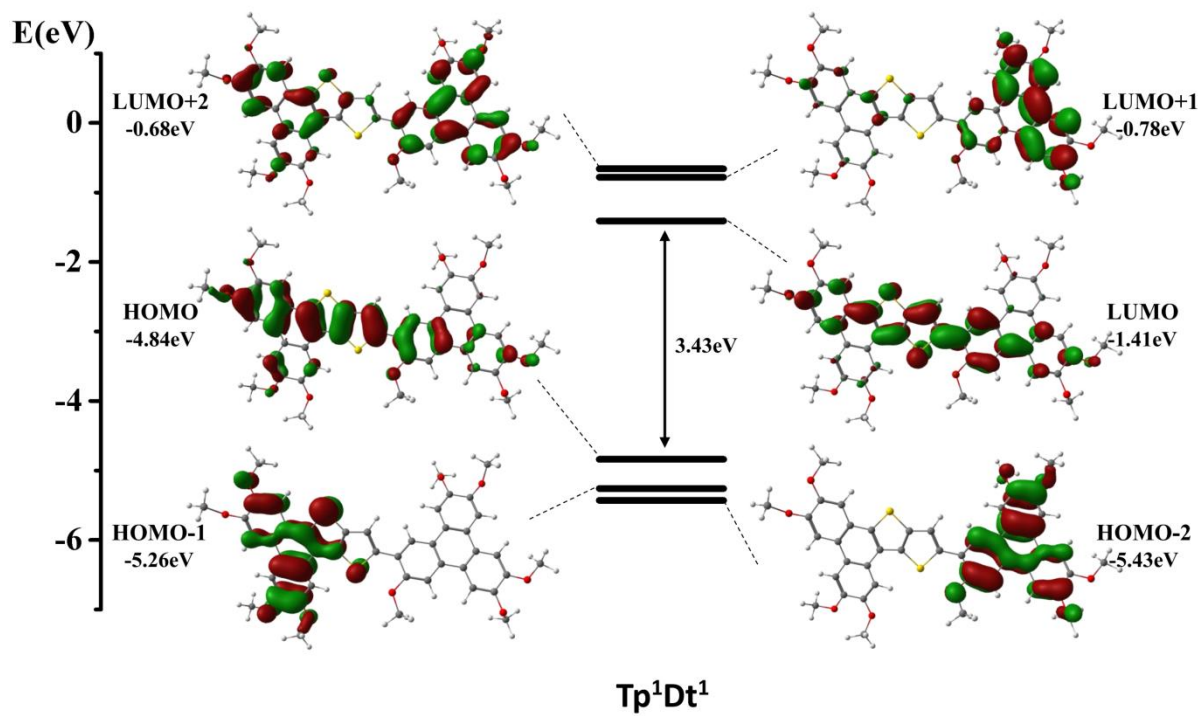

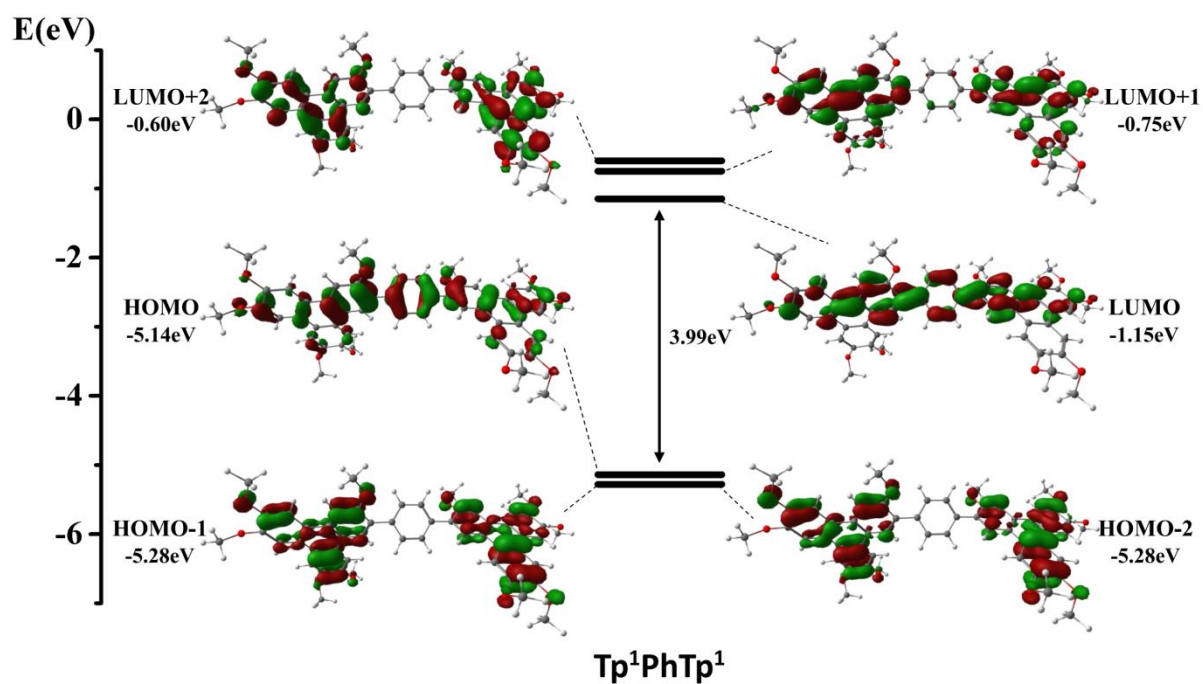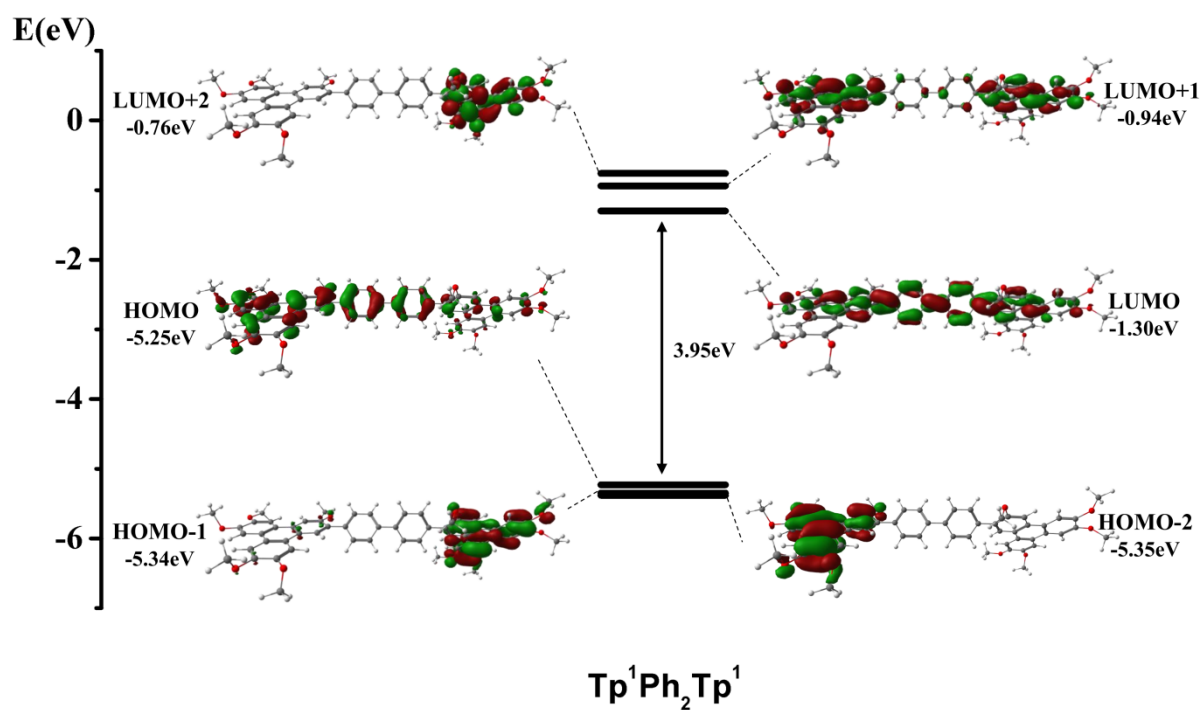

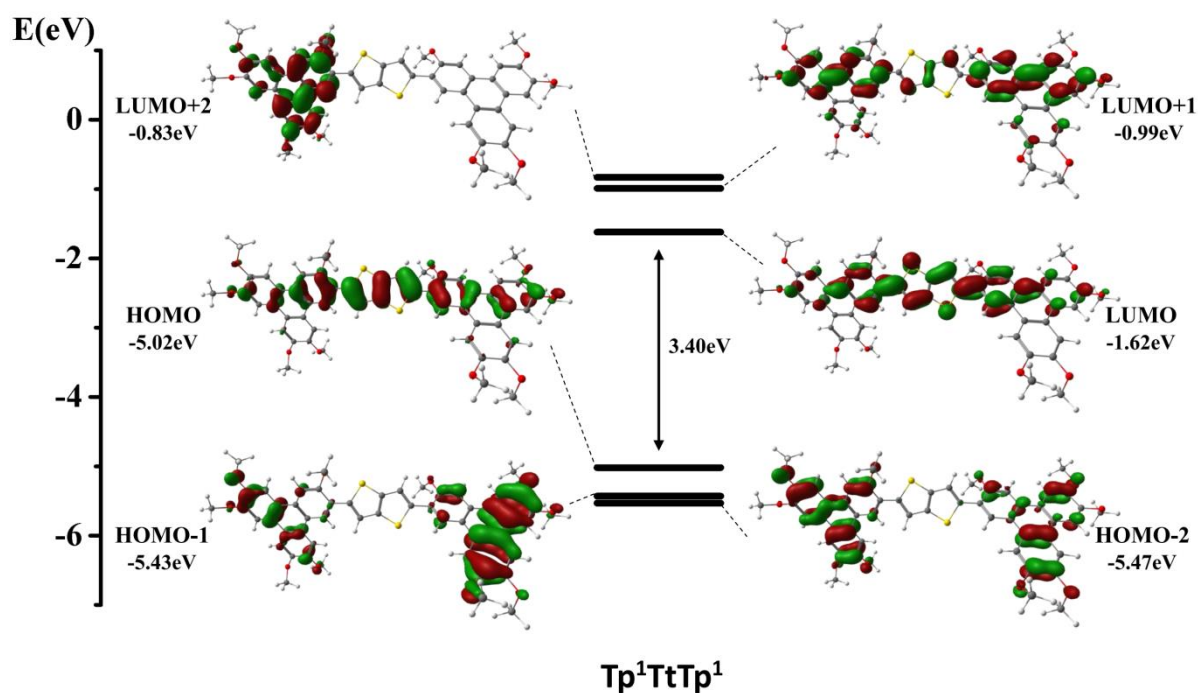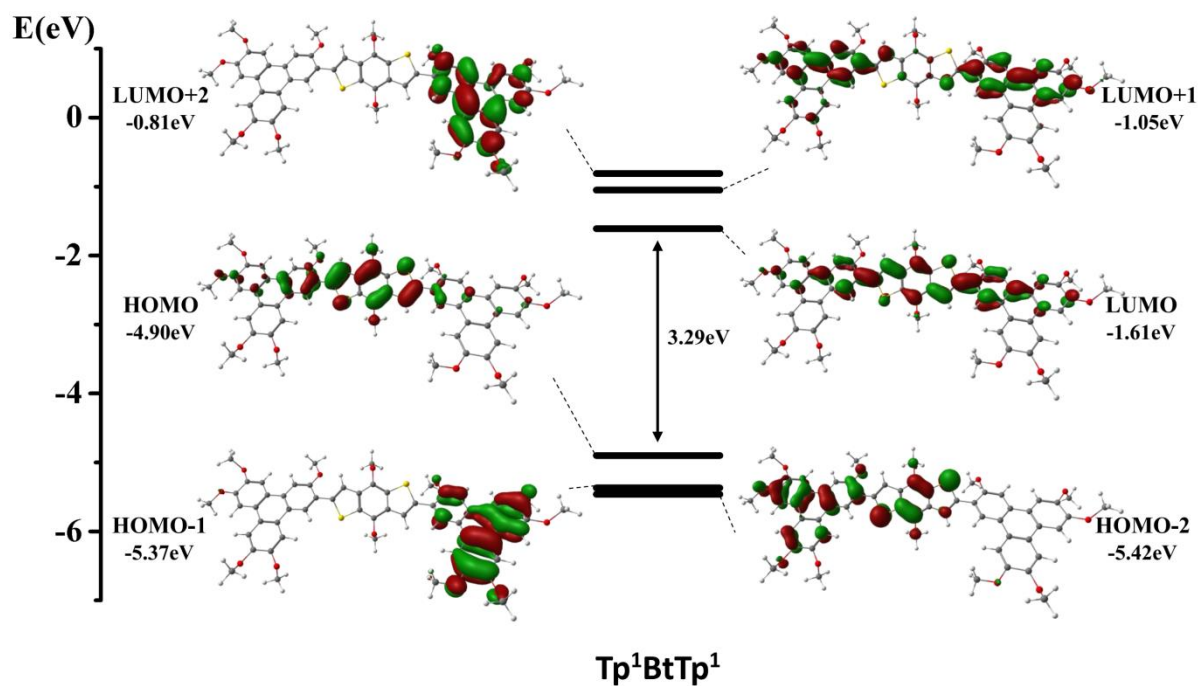

**Figure S59.** Partial molecular orbital diagram for the methoxy homologues of the dimers with some selected isodensity frontier molecular orbital mainly involved in the electronic transitions. All the DFT energy values are given in electronvolts. The arrows are intended to highlight the HOMO-LUMO energy gaps.

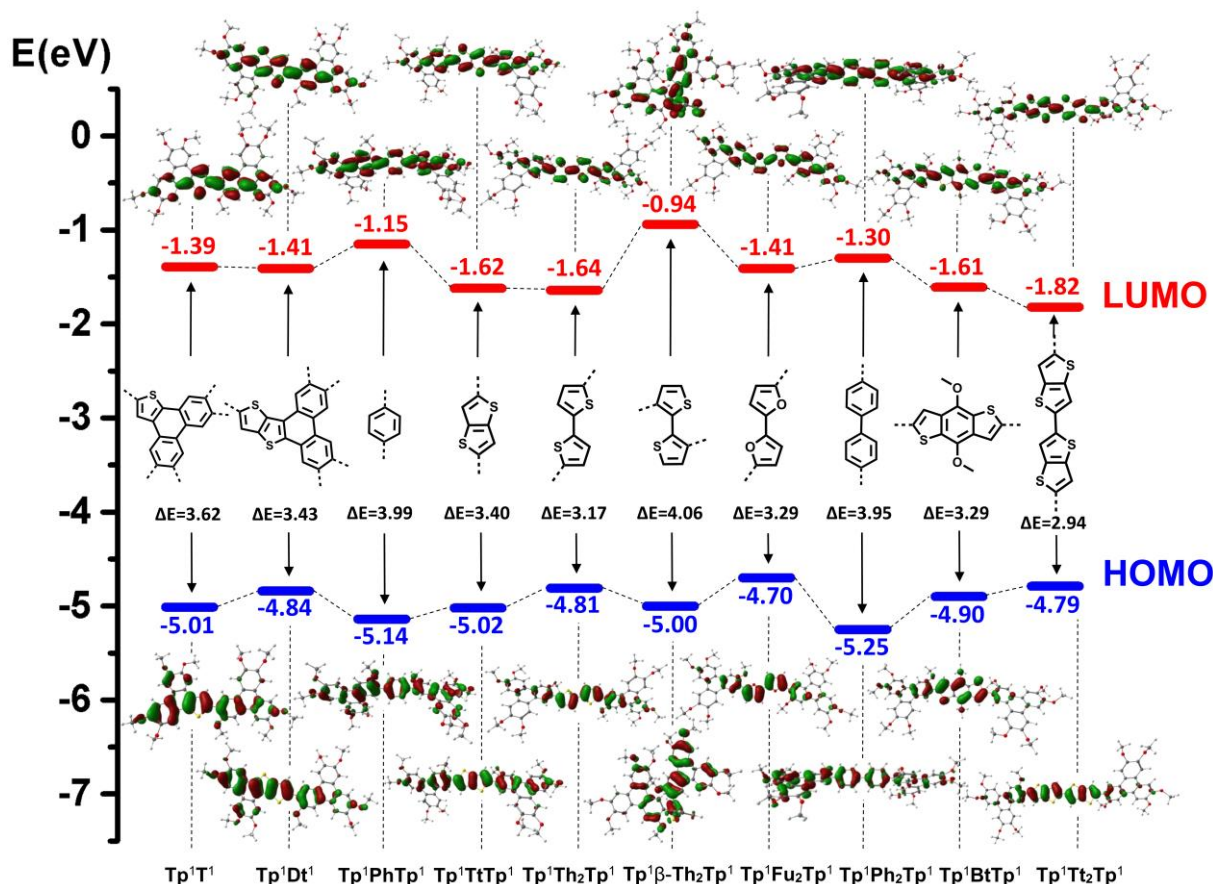

**Figure S60.** Comparison of HOMO-LUMO energy levels for the methoxy homologues of the dimeric compounds.

**Table S5.** List of selected molecular orbital energies for the methoxy homologues of the dimeric compounds and their HOMO-LUMO energy gaps ( $\Delta E$ ).

|                      | HOMO-2<br>(eV) | HOMO-1<br>(eV) | HOMO<br>(eV) | $\Delta E$<br>(eV) | LUMO<br>(eV) | LUMO+1<br>(eV) | LUMO+2<br>(eV) |
|----------------------|----------------|----------------|--------------|--------------------|--------------|----------------|----------------|
| $Tp^1Th_2Tp^1$       | -5.38          | -5.37          | -4.81        | 3.17               | -1.64        | -1.09          | -0.79          |
| $Tp^1\beta-Th_2Tp^1$ | -5.13          | -5.07          | -5.00        | 4.06               | -0.94        | -0.72          | -0.55          |
| $Tp^1Fu_2Tp^1$       | -5.38          | -5.36          | -4.70        | 3.29               | -1.41        | -1.02          | -0.78          |
| $Tp^1Tt_2Tp^1$       | -5.42          | -5.37          | -4.79        | 2.97               | -1.82        | -1.25          | -0.84          |
| $Tp^1T^1$            | -5.41          | -5.33          | -5.01        | 3.62               | -1.39        | -0.72          | -0.68          |
| $Tp^1Dt^1$           | -5.43          | -5.26          | -4.84        | 3.43               | -1.41        | -0.78          | -0.68          |
| $Tp^1PhTp^1$         | -5.28          | -5.28          | -5.14        | 3.99               | -1.15        | -0.75          | -0.60          |
| $Tp^1Ph_2Tp^1$       | -5.35          | -5.34          | -5.25        | 3.95               | -1.30        | -0.94          | -0.76          |
| $Tp^1TtTp^1$         | -5.47          | -5.43          | -5.02        | 3.40               | -1.62        | -0.99          | -0.83          |
| $Tp^1BtTp^1$         | -5.42          | -5.37          | -4.90        | 3.29               | -1.61        | -1.05          | -0.81          |

**Table S6.** Selected calculated excitation energies ( $\Delta E$ ), oscillator strengths (f), main orbital components, and assignment for the methoxy homologues of the dimers in THF solution.<sup>a</sup>

| Compounds      | $\lambda_{exc}/nm$ | $\Delta E/eV$ | f      | Transitions (Percentage Contribution)                                                 |
|----------------|--------------------|---------------|--------|---------------------------------------------------------------------------------------|
| $Tp^1Th_2Tp^1$ | 442.9              | 2.80          | 2.0778 | H-0 $\rightarrow$ L+0(+70%)                                                           |
|                | 374.4              | 3.31          | 0.0138 | H-1 $\rightarrow$ L+0(+57%), H-0 $\rightarrow$ L+3(+19%), H-1 $\rightarrow$ L+1(+15%) |
|                | 370.5              | 3.35          | 0.0029 | H-2 $\rightarrow$ L+0(+48%), H-1 $\rightarrow$ L+0(+21%)                              |
|                | 365.2              | 3.40          | 0.0073 | H-0 $\rightarrow$ L+1(+46%), H-2 $\rightarrow$ L+0(+17%)                              |
|                | 355.2              | 3.49          | 0.0062 | H-3 $\rightarrow$ L+0(+40%), H-2 $\rightarrow$ L+0(+32%), H-0 $\rightarrow$ L+1(+31%) |

|                                                     |                                                   |       |        |                                             |               |
|-----------------------------------------------------|---------------------------------------------------|-------|--------|---------------------------------------------|---------------|
|                                                     | 340.9                                             | 3.64  | 0.0237 | H-0→L+2(+51%), H-2→L+0(+13%)                |               |
|                                                     | 334.1                                             | 3.71  | 0.0121 | H-0→L+3(+51%), H-1→L+1(+19%), H-3→L+0(+13%) |               |
|                                                     | 330.8                                             | 3.75  | 0.0158 | H-4→L+0(+53%), H-0→L+2(+21%), H-0→L+3(+21%) |               |
|                                                     | 323.3                                             | 3.83  | 0.0142 | H-0→L+4(+49%), H-5→L+0(+12%), H-2→L+1(+11%) |               |
|                                                     | 323.2                                             | 3.84  | 0.0360 | H-0→L+5(+46%), H-0→L+4(+37%), H-1→L+3(+16%) |               |
|                                                     | 315.1                                             | 3.94  | 0.0124 | H-2→L+1(+47%), H-1→L+1(+30%), H-4→L+2(+10%) |               |
|                                                     | 312.5                                             | 3.97  | 0.0412 | H-1→L+1(+46%), H-3→L+3(+10%)                |               |
|                                                     | 310.6                                             | 3.99  | 0.0077 | H-3→L+1(+37%), H-2→L+2(+36%), H-0→L+2(+18%) |               |
|                                                     | 307.8                                             | 4.03  | 0.1809 | H-0→L+6(+54%), H-2→L+1(+21%), H-3→L+1(+19%) |               |
|                                                     | 302.3                                             | 4.10  | 0.0223 | H-3→L+1(+38%), H-4→L+1(+18%), H-1→L+5(+12%) |               |
|                                                     | 300.7                                             | 4.12  | 0.0028 | H-5→L+0(+58%), H-0→L+5(+17%), H-3→L+2(+12%) |               |
|                                                     | 299.1                                             | 4.14  | 0.0129 | H-1→L+5(+41%), H-5→L+0(+17%), H-1→L+1(+14%) |               |
|                                                     | 295.2                                             | 4.20  | 0.1360 | H-6→L+0(+49%), H-0→L+4(+15%), H-2→L+3(+13%) |               |
|                                                     | 293.0                                             | 4.23  | 0.0024 | H-4→L+1(+36%), H-3→L+2(+21%), H-3→L+4(+13%) |               |
|                                                     | 284.0                                             | 4.37  | 0.0161 | H-4→L+1(+42%), H-5→L+0(+23%), H-3→L+4(+19%) |               |
|                                                     | 281.7                                             | 4.40  | 0.0005 | H-1→L+2(+65%)                               |               |
|                                                     | 279.5                                             | 4.44  | 0.1474 | H-3→L+2(+31%), H-6→L+0(+31%), H-4→L+1(+22%) |               |
|                                                     | 278.4                                             | 4.45  | 0.2253 | H-7→L+0(+39%), H-2→L+4(+21%), H-2→L+2(+21%) |               |
|                                                     | 277.8                                             | 4.46  | 0.0359 | H-7→L+0(+39%), H-2→L+5(+28%), H-6→L+0(+21%) |               |
|                                                     | 276.4                                             | 4.49  | 0.1791 | H-2→L+3(+44%), H-1→L+5(+19%), H-1→L+3(+15%) |               |
|                                                     | 275.9                                             | 4.49  | 0.5920 | H-3→L+4(+26%), H-7→L+0(+21%), H-6→L+0(+21%) |               |
|                                                     | 274.7                                             | 4.51  | 0.0131 | H-2→L+5(+29%), H-3→L+5(+22%), H-3→L+4(+19%) |               |
|                                                     | 272.2                                             | 4.56  | 0.0035 | H-8→L+0(+43%), H-2→L+3(+24%), H-3→L+4(+18%) |               |
|                                                     | 271.2                                             | 4.57  | 0.0170 | H-1→L+4(+34%), H-2→L+3(+32%), H-1→L+6(+20%) |               |
|                                                     | 268.6                                             | 4.62  | 0.0742 | H-9→L+0(+47%), H-5→L+0(+21%), H-0→L+7(+12%) |               |
| <b>TP<sup>1</sup>β-Th<sub>2</sub>TP<sup>1</sup></b> | 350.8                                             | 3.53  | 0.1647 | H-0→L+0(+67%)                               |               |
|                                                     | 347.7                                             | 3.57  | 0.0245 | H-1→L+0(+56%), H-2→L+0(+24%), H-0→L+3(+16%) |               |
|                                                     | 340.3                                             | 3.64  | 0.0117 | H-2→L+0(+53%), H-1→L+1(+20%), H-0→L+3(+16%) |               |
|                                                     | 329.7                                             | 3.76  | 0.0045 | H-0→L+1(+54%), H-2→L+1(+15%), H-2→L+0(+11%) |               |
|                                                     | 327.5                                             | 3.79  | 0.0212 | H-1→L+1(+40%), H-0→L+2(+22%), H-2→L+1(+12%) |               |
|                                                     | 322.4                                             | 3.85  | 0.0398 | H-0→L+1(+34%), H-1→L+1(+27%), H-3→L+0(+24%) |               |
|                                                     | 316.0                                             | 3.92  | 0.0096 | H-3→L+0(+48%), H-2→L+1(+40%), H-1→L+1(+22%) |               |
|                                                     | 315.3                                             | 3.93  | 0.0136 | H-1→L+2(+36%), H-0→L+3(+35%), H-2→L+1(+15%) |               |
|                                                     | 310.2                                             | 4.00  | 0.0125 | H-0→L+2(+43%), H-0→L+4(+20%), H-3→L+0(+16%) |               |
|                                                     | 306.9                                             | 4.01  | 0.0232 | H-0→L+4(+39%), H-1→L+3(+26%), H-0→L+5(+24%) |               |
|                                                     | 304.4                                             | 4.07  | 0.0097 | H-0→L+2(+38%), H-1→L+2(+36%), H-0→L+5(+15%) |               |
|                                                     | 303.4                                             | 4.09  | 0.0040 | H-1→L+4(+34%), H-0→L+4(+31%), H-3→L+1(+20%) |               |
|                                                     | 302.6                                             | 4.10  | 0.0384 | H-2→L+2(+32%), H-1→L+4(+19%), H-2→L+4(+19%) |               |
|                                                     | 300.6                                             | 4.12  | 0.0073 | H-4→L+0(+51%), H-1→L+3(+18%), H-1→L+2(+13%) |               |
|                                                     | 299.3                                             | 4.14  | 0.0120 | H-1→L+3(+31%), H-3→L+1(+28%), H-1→L+2(+23%) |               |
|                                                     | 296.5                                             | 4.18  | 0.0982 | H-3→L+1(+31%), H-2→L+3(+28%), H-0→L+3(+15%) |               |
|                                                     | 294.0                                             | 4.22  | 0.0363 | H-2→L+2(+47%), H-1→L+2(+10%)                |               |
|                                                     | 292.9                                             | 4.23  | 0.0538 | H-2→L+3(+32%), H-2→L+4(+18%), H-2→L+2(+17%) |               |
|                                                     | 291.6                                             | 4.25  | 0.0490 | H-2→L+4(+28%), H-0→L+6(+18%), H-3→L+3(+16%) |               |
|                                                     | 288.4                                             | 4.30  | 0.1400 | H-1→L+5(+47%), H-2→L+4(+32%), H-1→L+6(+17%) |               |
|                                                     | 287.4                                             | 4.31  | 0.0632 | H-0→L+6(+50%), H-4→L+1(+25%), H-3→L+2(+23%) |               |
|                                                     | 286.7                                             | 4.32  | 0.2200 | H-0→L+6(+33%), H-2→L+5(+26%), H-1→L+3(+13%) |               |
|                                                     | 285.8                                             | 4.34  | 0.1592 | H-2→L+5(+41%), H-1→L+6(+36%), H-3→L+1(+16%) |               |
|                                                     | 282.7                                             | 4.39  | 0.1867 | H-4→L+1(+47%), H-2→L+5(+13%), H-0→L+3(+10%) |               |
|                                                     | 280.5                                             | 4.42  | 0.0198 | H-3→L+3(+50%), H-2→L+6(+19%), H-1→L+5(+19%) |               |
|                                                     | 278.6                                             | 4.45  | 0.0189 | H-5→L+0(+51%), H-0→L+7(+23%), H-3→L+3(+15%) |               |
|                                                     | 276.5                                             | 4.48  | 0.0150 | H-2→L+6(+54%), H-0→L+7(+16%), H-4→L+3(+11%) |               |
|                                                     | 275.8                                             | 4.50  | 0.1091 | H-3→L+4(+42%), H-5→L+0(+18%), H-3→L+3(+15%) |               |
|                                                     | 275.1                                             | 4.51  | 0.2961 | H-3→L+4(+34%), H-1→L+6(+25%), H-4→L+3(+18%) |               |
|                                                     | 274.5                                             | 4.52  | 0.2571 | H-3→L+5(+43%), H-3→L+4(+14%), H-3→L+6(+14%) |               |
|                                                     | <b>TP<sup>1</sup>Fu<sub>2</sub>TP<sup>1</sup></b> | 427.5 | 2.90   | 1.9861                                      | H-0→L+0(+70%) |

|                                                   |       |      |        |                                             |
|---------------------------------------------------|-------|------|--------|---------------------------------------------|
|                                                   | 368.8 | 3.36 | 0.0005 | H-0→L+1(+67%), H-2→L+0(+13%), H-0→L+2(+13%) |
|                                                   | 362.1 | 3.42 | 0.0036 | H-0→L+2(+51%), H-2→L+0(+23%), H-3→L+0(+21%) |
|                                                   | 361.3 | 3.43 | 0.0080 | H-1→L+0(+48%), H-0→L+3(+34%)                |
|                                                   | 342.2 | 3.62 | 0.0138 | H-2→L+0(+59%), H-0→L+4(+13%)                |
|                                                   | 335.9 | 3.69 | 0.0352 | H-3→L+0(+37%), H-0→L+3(+30%), H-0→L+4(+27%) |
|                                                   | 333.7 | 3.72 | 0.0206 | H-0→L+3(+43%)                               |
|                                                   | 330.5 | 3.75 | 0.0151 | H-0→L+5(+62%)                               |
|                                                   | 329.1 | 3.77 | 0.0268 | H-0→L+4(+53%), H-0→L+2(+22%)                |
|                                                   | 319.1 | 3.89 | 0.0168 | H-4→L+0(+50%), H-2→L+2(+27%), H-2→L+1(+19%) |
|                                                   | 311.9 | 3.98 | 0.0166 | H-1→L+1(+57%), H-0→L+3(+20%), H-1→L+0(+19%) |
|                                                   | 308.6 | 4.02 | 0.0134 | H-2→L+1(+52%), H-3→L+1(+13%), H-3→L+4(+13%) |
|                                                   | 305.3 | 4.06 | 0.1086 | H-0→L+6(+36%), H-4→L+0(+32%), H-3→L+1(+16%) |
|                                                   | 300.7 | 4.12 | 0.4523 | H-0→L+6(+45%), H-2→L+1(+18%)                |
|                                                   | 299.6 | 4.14 | 0.0155 | H-1→L+5(+42%), H-1→L+1(+23%)                |
|                                                   | 298.5 | 4.15 | 0.0405 | H-1→L+5(+28%), H-3→L+1(+27%), H-0→L+6(+17%) |
|                                                   | 293.4 | 4.23 | 0.0015 | H-5→L+0(+38%), H-2→L+4(+31%), H-3→L+2(+24%) |
|                                                   | 290.3 | 4.27 | 0.0821 | H-6→L+0(+38%), H-3→L+2(+23%), H-1→L+3(+20%) |
|                                                   | 287.8 | 4.31 | 0.0122 | H-4→L+1(+46%), H-3→L+4(+20%), H-3→L+0(+16%) |
|                                                   | 282.7 | 4.39 | 0.0021 | H-1→L+2(+70%)                               |
|                                                   | 278.0 | 4.46 | 0.1616 | H-3→L+2(+42%), H-4→L+4(+10%)                |
|                                                   | 276.3 | 4.49 | 0.0656 | H-4→L+1(+38%), H-5→L+0(+37%), H-1→L+3(+13%) |
|                                                   | 275.1 | 4.51 | 0.1243 | H-2→L+3(+36%), H-2→L+5(+34%), H-1→L+3(+17%) |
|                                                   | 274.1 | 4.52 | 0.1579 | H-2→L+3(+47%), H-3→L+5(+21%), H-4→L+4(+11%) |
|                                                   | 273.7 | 4.53 | 0.0014 | H-3→L+4(+38%), H-3→L+2(+22%), H-2→L+6(+14%) |
|                                                   | 270.2 | 4.59 | 0.0556 | H-1→L+4(+46%), H-1→L+6(+14%)                |
|                                                   | 269.0 | 4.61 | 0.1861 | H-1→L+4(+48%), H-3→L+3(+44%)                |
|                                                   | 268.2 | 4.62 | 0.5421 | H-6→L+0(+49%), H-4→L+0(+10%)                |
|                                                   | 265.9 | 4.66 | 0.1418 | H-4→L+2(+50%), H-6→L+2(+10%), H-3→L+2(+10%) |
|                                                   | 263.8 | 4.70 | 0.1013 | H-2→L+5(+42%), H-3→L+5(+40%), H-4→L+2(+27%) |
| <b>TP<sup>1</sup>Tt<sub>2</sub>TP<sup>1</sup></b> | 470.4 | 2.64 | 2.6883 | H-0→L+0(+70%)                               |
|                                                   | 387.8 | 3.20 | 0.0045 | H-0→L+1(+52%)                               |
|                                                   | 383.7 | 3.23 | 0.0116 | H-2→L+0(+65%), H-2→L+1(+17%), H-0→L+4(+14%) |
|                                                   | 377.4 | 3.28 | 0.0059 | H-1→L+0(+42%), H-0→L+1(+35%)                |
|                                                   | 369.7 | 3.35 | 0.0072 | H-3→L+0(+50%), H-1→L+0(+30%), H-0→L+1(+30%) |
|                                                   | 349.9 | 3.54 | 0.0133 | H-4→L+0(+50%), H-0→L+2(+33%), H-0→L+3(+22%) |
|                                                   | 343.2 | 3.61 | 0.0133 | H-0→L+2(+51%), H-3→L+0(+18%)                |
|                                                   | 339.9 | 3.65 | 0.0092 | H-0→L+4(+50%), H-2→L+1(+30%), H-1→L+4(+13%) |
|                                                   | 332.7 | 3.73 | 0.0370 | H-0→L+3(+58%), H-0→L+4(+13%), H-2→L+4(+12%) |
|                                                   | 327.0 | 3.79 | 0.0006 | H-5→L+0(+43%), H-0→L+6(+27%), H-1→L+6(+12%) |
|                                                   | 326.2 | 3.80 | 0.1036 | H-1→L+1(+58%)                               |
|                                                   | 324.4 | 3.82 | 0.0015 | H-5→L+0(+47%), H-6→L+0(+33%), H-0→L+5(+23%) |
|                                                   | 322.6 | 3.84 | 0.0416 | H-0→L+6(+40%), H-0→L+5(+33%), H-1→L+1(+30%) |
|                                                   | 319.9 | 3.88 | 0.0308 | H-2→L+1(+51%)                               |
|                                                   | 317.7 | 3.90 | 0.0236 | H-3→L+1(+44%), H-4→L+2(+13%)                |
|                                                   | 314.7 | 3.94 | 0.0498 | H-7→L+0(+53%), H-0→L+5(+15%), H-5→L+0(+13%) |
|                                                   | 312.9 | 3.96 | 0.0043 | H-7→L+0(+43%), H-6→L+0(+37%), H-3→L+1(+18%) |
|                                                   | 308.3 | 4.02 | 0.0158 | H-1→L+2(+32%), H-4→L+1(+27%), H-3→L+1(+22%) |
|                                                   | 302.3 | 4.10 | 0.0469 | H-8→L+0(+35%), H-2→L+4(+24%), H-2→L+3(+15%) |
|                                                   | 301.3 | 4.11 | 0.0022 | H-8→L+0(+44%), H-2→L+6(+28%), H-1→L+4(+16%) |
|                                                   | 299.2 | 4.14 | 0.0143 | H-4→L+1(+36%), H-4→L+2(+17%), H-2→L+5(+13%) |
|                                                   | 294.8 | 4.21 | 0.0057 | H-9→L+0(+41%), H-4→L+1(+30%), H-3→L+2(+21%) |
|                                                   | 292.1 | 4.24 | 0.0010 | H-0→L+7(+34%), H-9→L+0(+30%)                |
|                                                   | 287.2 | 4.32 | 0.4720 | H-2→L+4(+34%), H-1→L+1(+17%), H-3→L+3(+16%) |
|                                                   | 285.3 | 4.35 | 0.0170 | H-1→L+3(+31%), H-0→L+7(+30%), H-0→L+8(+23%) |
|                                                   | 285.0 | 4.35 | 0.0275 | H-2→L+3(+45%), H-2→L+6(+35%), H-2→L+1(+17%) |
|                                                   | 284.4 | 4.36 | 0.1028 | H-1→L+5(+37%), H-3→L+1(+16%), H-9→L+0(+14%) |



|                                    |                                     |       |        |                                             |                              |
|------------------------------------|-------------------------------------|-------|--------|---------------------------------------------|------------------------------|
|                                    | 283.2                               | 4.38  | 0.1355 | H-5→L+1(+51%), H-1→L+2(+17%), H-0→L+7(+13%) |                              |
|                                    | 281.4                               | 4.41  | 0.1054 | H-5→L+1(+29%), H-9→L+0(+25%), H-1→L+6(+16%) |                              |
|                                    | 279.7                               | 4.43  | 0.0097 | H-0→L+8(+55%), H-2→L+2(+14%)                |                              |
| <b>Тр<sup>1</sup>Т<sup>1</sup></b> | 383.6                               | 3.23  | 1.0294 | H-0→L+0(+70%)                               |                              |
|                                    | 358.6                               | 3.46  | 0.0082 | H-1→L+0(+62%), H-0→L+3(+14%)                |                              |
|                                    | 357.7                               | 3.47  | 0.0232 | H-2→L+0(+59%), H-0→L+1(+25%), H-1→L+0(+19%) |                              |
|                                    | 327.7                               | 3.78  | 0.0027 | H-3→L+0(+62%), H-0→L+3(+15%), H-2→L+1(+14%) |                              |
|                                    | 321.9                               | 3.85  | 0.0219 | H-0→L+2(+46%), H-1→L+0(+26%), H-0→L+1(+22%) |                              |
|                                    | 319.1                               | 3.89  | 0.0160 | H-0→L+3(+36%), H-0→L+1(+30%), H-0→L+2(+20%) |                              |
|                                    | 316.0                               | 3.92  | 0.0469 | H-0→L+1(+41%), H-3→L+0(+20%), H-2→L+1(+18%) |                              |
|                                    | 313.7                               | 3.95  | 0.0257 | H-0→L+4(+47%), H-0→L+3(+35%), H-0→L+1(+15%) |                              |
|                                    | 298.4                               | 4.16  | 0.1409 | H-2→L+3(+36%), H-2→L+2(+29%), H-2→L+4(+13%) |                              |
|                                    | 294.1                               | 4.22  | 0.6569 | H-2→L+1(+36%), H-4→L+0(+27%), H-2→L+3(+19%) |                              |
|                                    | 292.3                               | 4.24  | 0.0020 | H-4→L+0(+54%), H-2→L+2(+11%)                |                              |
|                                    | 290.2                               | 4.27  | 0.0072 | H-1→L+1(+65%)                               |                              |
|                                    | 288.8                               | 4.29  | 0.0211 | H-1→L+2(+43%), H-4→L+0(+21%), H-0→L+3(+18%) |                              |
|                                    | 287.0                               | 4.32  | 0.1379 | H-5→L+0(+41%), H-1→L+4(+30%), H-0→L+2(+20%) |                              |
|                                    | 283.6                               | 4.37  | 0.0159 | H-2→L+2(+44%), H-2→L+1(+25%), H-1→L+2(+10%) |                              |
|                                    | 280.0                               | 4.43  | 0.0529 | H-1→L+3(+46%), H-1→L+4(+37%), H-1→L+1(+20%) |                              |
|                                    | 277.7                               | 4.47  | 0.1595 | H-1→L+3(+36%), H-5→L+0(+32%), H-1→L+5(+12%) |                              |
|                                    | 272.4                               | 4.55  | 0.0145 | H-2→L+4(+58%), H-2→L+2(+21%), H-3→L+1(+13%) |                              |
|                                    | 269.6                               | 4.60  | 0.0902 | H-3→L+2(+42%), H-3→L+3(+41%), H-3→L+4(+12%) |                              |
|                                    | 267.2                               | 4.64  | 0.3332 | H-3→L+2(+42%), H-3→L+1(+24%), H-2→L+2(+12%) |                              |
|                                    | 265.4                               | 4.67  | 0.2697 | H-3→L+1(+35%), H-3→L+3(+34%), H-2→L+3(+23%) |                              |
|                                    | 261.7                               | 4.74  | 0.0824 | H-3→L+4(+41%), H-2→L+1(+14%), H-1→L+5(+10%) |                              |
|                                    | 258.4                               | 4.80  | 0.1950 | H-3→L+4(+36%), H-0→L+5(+32%), H-6→L+0(+27%) |                              |
|                                    | 256.1                               | 4.84  | 0.0965 | H-6→L+0(+41%), H-4→L+1(+21%), H-5→L+2(+12%) |                              |
|                                    | 254.1                               | 4.88  | 0.3780 | H-7→L+0(+34%), H-5→L+1(+19%), H-4→L+4(+18%) |                              |
|                                    | 251.4                               | 4.93  | 0.0255 | H-7→L+0(+45%), H-6→L+0(+30%), H-1→L+5(+18%) |                              |
|                                    | 250.5                               | 4.95  | 0.0427 | H-4→L+1(+34%), H-4→L+2(+17%), H-3→L+4(+12%) |                              |
|                                    | 249.7                               | 4.97  | 0.0388 | H-4→L+1(+40%), H-8→L+0(+36%), H-7→L+0(+19%) |                              |
|                                    | 248.1                               | 5.00  | 0.1295 | H-4→L+2(+51%), H-1→L+5(+20%), H-9→L+0(+19%) |                              |
|                                    | 246.8                               | 5.02  | 0.0683 | H-8→L+0(+38%), H-4→L+3(+12%)                |                              |
|                                    | <b>Тр<sup>1</sup>Dt<sup>1</sup></b> | 404.3 | 3.07   | 1.4008                                      | H-0→L+0(+70%)                |
|                                    |                                     | 366.6 | 3.38   | 0.0265                                      | H-1→L+0(+63%), H-0→L+2(+13%) |
| 358.8                              |                                     | 3.46  | 0.0126 | H-2→L+0(+57%)                               |                              |
| 339.0                              |                                     | 3.66  | 0.0211 | H-3→L+0(+50%), H-0→L+1(+36%), H-2→L+0(+12%) |                              |
| 334.8                              |                                     | 3.70  | 0.0673 | H-0→L+1(+43%), H-1→L+0(+18%), H-2→L+0(+14%) |                              |
| 329.8                              |                                     | 3.76  | 0.0164 | H-0→L+3(+41%), H-3→L+0(+31%), H-1→L+0(+21%) |                              |
| 325.4                              |                                     | 3.81  | 0.0213 | H-0→L+2(+43%), H-2→L+0(+21%), H-0→L+3(+14%) |                              |
| 324.2                              |                                     | 3.82  | 0.0325 | H-0→L+4(+47%), H-0→L+3(+36%), H-2→L+0(+25%) |                              |
| 306.1                              |                                     | 4.05  | 0.1799 | H-4→L+0(+61%), H-1→L+2(+14%), H-3→L+1(+11%) |                              |
| 303.2                              |                                     | 4.09  | 0.0387 | H-2→L+1(+40%), H-3→L+1(+25%), H-3→L+2(+21%) |                              |
| 300.9                              |                                     | 4.12  | 0.1990 | H-1→L+2(+32%), H-5→L+0(+13%), H-3→L+1(+12%) |                              |
| 296.3                              |                                     | 4.18  | 0.1031 | H-1→L+1(+35%), H-1→L+4(+32%), H-3→L+1(+18%) |                              |
| 294.8                              |                                     | 4.21  | 0.0085 | H-5→L+0(+46%), H-2→L+2(+20%), H-2→L+1(+16%) |                              |
| 291.1                              |                                     | 4.26  | 0.0327 | H-1→L+2(+46%), H-1→L+1(+44%), H-1→L+3(+18%) |                              |
| 286.5                              |                                     | 4.33  | 0.1090 | H-5→L+0(+32%), H-1→L+3(+11%), H-3→L+4(+10%) |                              |
| 284.2                              |                                     | 4.36  | 0.0232 | H-1→L+3(+35%), H-1→L+4(+34%), H-2→L+2(+13%) |                              |
| 282.4                              |                                     | 4.39  | 0.0176 | H-2→L+4(+33%), H-1→L+3(+28%), H-2→L+3(+26%) |                              |
| 280.7                              |                                     | 4.42  | 0.0295 | H-6→L+0(+55%), H-3→L+4(+16%)                |                              |
| 277.5                              |                                     | 4.47  | 0.1752 | H-3→L+2(+46%), H-1→L+4(+15%), H-3→L+3(+14%) |                              |
| 274.8                              |                                     | 4.51  | 0.0534 | H-3→L+3(+47%), H-3→L+4(+37%), H-0→L+5(+17%) |                              |
| 273.5                              |                                     | 4.53  | 0.4020 | H-3→L+1(+37%), H-2→L+2(+36%), H-3→L+2(+28%) |                              |
| 270.5                              |                                     | 4.58  | 0.0475 | H-2→L+3(+47%), H-3→L+2(+17%)                |                              |
| 267.5                              |                                     | 4.63  | 0.1555 | H-0→L+5(+45%), H-6→L+0(+16%), H-1→L+4(+15%) |                              |

|                                                   |       |      |        |                                             |
|---------------------------------------------------|-------|------|--------|---------------------------------------------|
|                                                   | 267.0 | 4.64 | 0.2656 | H-3→L+4(+44%), H-2→L+3(+19%), H-0→L+6(+13%) |
|                                                   | 264.8 | 4.68 | 0.0014 | H-0→L+7(+68%)                               |
|                                                   | 261.7 | 4.74 | 0.0340 | H-6→L+0(+52%), H-3→L+4(+19%), H-4→L+2(+14%) |
|                                                   | 258.6 | 4.79 | 0.0988 | H-4→L+1(+49%), H-7→L+0(+25%), H-4→L+4(+19%) |
|                                                   | 257.4 | 4.82 | 0.0669 | H-1→L+5(+29%), H-8→L+0(+26%), H-4→L+3(+24%) |
|                                                   | 255.4 | 4.85 | 0.0710 | H-4→L+2(+48%), H-4→L+1(+33%), H-4→L+3(+20%) |
|                                                   | 254.4 | 4.87 | 0.0442 | H-8→L+0(+55%)                               |
| <b>TP<sup>1</sup>PhTP<sup>1</sup></b>             | 351.6 | 3.53 | 1.0767 | H-0→L+0(+67%)                               |
|                                                   | 344.1 | 3.60 | 0.0123 | H-1→L+0(+59%), H-2→L+1(+22%)                |
|                                                   | 342.9 | 3.62 | 0.1577 | H-2→L+0(+58%), H-0→L+2(+23%), H-1→L+1(+22%) |
|                                                   | 324.2 | 3.82 | 0.0019 | H-3→L+0(+60%), H-1→L+2(+20%)                |
|                                                   | 312.3 | 3.97 | 0.0018 | H-0→L+1(+50%), H-3→L+0(+22%), H-1→L+0(+21%) |
|                                                   | 309.8 | 4.00 | 0.0149 | H-1→L+1(+36%), H-0→L+2(+32%), H-3→L+3(+20%) |
|                                                   | 308.1 | 4.02 | 0.0065 | H-0→L+3(+30%), H-1→L+0(+27%), H-1→L+4(+20%) |
|                                                   | 301.8 | 4.11 | 0.3299 | H-0→L+4(+36%), H-2→L+2(+33%), H-3→L+1(+25%) |
|                                                   | 299.2 | 4.14 | 0.1753 | H-0→L+4(+38%), H-3→L+5(+20%), H-1→L+3(+18%) |
|                                                   | 297.6 | 4.17 | 0.0011 | H-0→L+5(+55%), H-3→L+4(+23%), H-5→L+0(+23%) |
|                                                   | 293.9 | 4.22 | 0.0472 | H-1→L+1(+40%), H-2→L+4(+34%), H-4→L+2(+11%) |
|                                                   | 293.6 | 4.22 | 0.0010 | H-2→L+1(+42%), H-1→L+4(+33%), H-5→L+2(+10%) |
|                                                   | 286.4 | 4.33 | 0.1466 | H-0→L+3(+55%), H-2→L+1(+26%), H-2→L+5(+13%) |
|                                                   | 286.3 | 4.33 | 0.1580 | H-0→L+2(+54%), H-2→L+4(+13%), H-4→L+2(+12%) |
|                                                   | 282.5 | 4.39 | 0.0005 | H-1→L+2(+36%), H-0→L+5(+29%), H-0→L+1(+26%) |
|                                                   | 282.0 | 4.40 | 0.6260 | H-4→L+0(+52%), H-0→L+4(+23%)                |
|                                                   | 280.1 | 4.43 | 0.3870 | H-3→L+1(+40%), H-1→L+3(+30%), H-0→L+4(+30%) |
|                                                   | 278.0 | 4.46 | 0.0169 | H-2→L+3(+51%), H-1→L+2(+47%)                |
|                                                   | 278.0 | 4.46 | 0.0227 | H-2→L+2(+51%), H-1→L+3(+46%)                |
|                                                   | 271.2 | 4.57 | 0.1694 | H-1→L+5(+44%), H-3→L+5(+26%), H-2→L+4(+22%) |
|                                                   | 270.9 | 4.58 | 0.0002 | H-3→L+4(+36%), H-1→L+4(+36%), H-2→L+5(+35%) |
|                                                   | 270.2 | 4.59 | 0.3564 | H-3→L+2(+48%), H-2→L+5(+30%), H-2→L+1(+22%) |
|                                                   | 269.7 | 4.60 | 0.3023 | H-3→L+3(+45%), H-2→L+4(+30%), H-3→L+5(+27%) |
|                                                   | 268.6 | 4.62 | 0.0411 | H-7→L+0(+43%), H-0→L+7(+37%), H-5→L+0(+20%) |
|                                                   | 268.1 | 4.62 | 0.0488 | H-3→L+5(+47%)                               |
|                                                   | 267.7 | 4.63 | 0.1254 | H-1→L+4(+31%), H-7→L+0(+27%), H-2→L+5(+20%) |
|                                                   | 266.0 | 4.66 | 0.0000 | H-5→L+0(+54%), H-0→L+1(+13%), H-1→L+2(+13%) |
|                                                   | 260.5 | 4.76 | 0.1698 | H-6→L+0(+56%), H-0→L+6(+26%), H-3→L+5(+21%) |
|                                                   | 259.2 | 4.78 | 0.0273 | H-4→L+1(+64%)                               |
|                                                   | 252.3 | 4.91 | 0.2537 | H-4→L+3(+50%), H-8→L+0(+22%), H-1→L+4(+15%) |
| <b>TP<sup>1</sup>Ph<sub>2</sub>TP<sup>1</sup></b> | 353.6 | 3.51 | 1.4897 | H-0→L+0(+67%), H-3→L+1(+12%), H-2→L+0(+10%) |
|                                                   | 347.3 | 3.57 | 0.0205 | H-1→L+0(+56%), H-3→L+2(+18%), H-2→L+0(+17%) |
|                                                   | 346.2 | 3.58 | 0.2023 | H-2→L+0(+55%), H-2→L+1(+20%), H-0→L+3(+19%) |
|                                                   | 328.6 | 3.77 | 0.0270 | H-3→L+0(+58%), H-0→L+1(+20%), H-1→L+0(+10%) |
|                                                   | 314.6 | 3.94 | 0.0090 | H-0→L+1(+39%), H-2→L+1(+27%), H-0→L+3(+21%) |
|                                                   | 312.9 | 3.96 | 0.0671 | H-1→L+1(+33%), H-1→L+0(+29%), H-0→L+2(+27%) |
|                                                   | 311.4 | 3.98 | 0.0225 | H-0→L+1(+44%), H-2→L+0(+22%)                |
|                                                   | 307.4 | 4.03 | 0.4355 | H-1→L+2(+38%), H-3→L+1(+29%), H-1→L+1(+23%) |
|                                                   | 300.3 | 4.13 | 0.0060 | H-0→L+4(+42%), H-3→L+5(+21%), H-5→L+1(+16%) |
|                                                   | 299.1 | 4.15 | 0.0037 | H-0→L+5(+35%), H-1→L+1(+26%), H-5→L+0(+21%) |
|                                                   | 297.5 | 4.17 | 0.0132 | H-2→L+4(+36%), H-2→L+5(+26%), H-1→L+5(+16%) |
|                                                   | 296.6 | 4.18 | 0.0284 | H-1→L+5(+24%), H-3→L+1(+18%), H-4→L+0(+18%) |
|                                                   | 290.7 | 4.26 | 0.4718 | H-4→L+0(+39%), H-0→L+2(+33%), H-1→L+2(+12%) |
|                                                   | 287.9 | 4.31 | 0.3079 | H-0→L+2(+44%), H-3→L+1(+31%), H-3→L+2(+16%) |
|                                                   | 284.9 | 4.35 | 0.0324 | H-2→L+3(+39%), H-0→L+5(+25%), H-0→L+1(+24%) |
|                                                   | 282.4 | 4.39 | 0.2694 | H-0→L+3(+51%)                               |
|                                                   | 281.3 | 4.41 | 0.2199 | H-2→L+2(+30%), H-0→L+4(+27%), H-3→L+1(+23%) |
|                                                   | 280.9 | 4.41 | 0.0610 | H-2→L+2(+60%), H-1→L+2(+23%)                |
|                                                   | 277.5 | 4.47 | 0.2379 | H-3→L+2(+41%), H-1→L+5(+21%), H-1→L+1(+18%) |

|                                       |                                       |       |        |                                              |                              |
|---------------------------------------|---------------------------------------|-------|--------|----------------------------------------------|------------------------------|
|                                       | 275.6                                 | 4.50  | 0.0358 | H-5→L+0(+51%), H-1→L+3(+13%)                 |                              |
|                                       | 275.1                                 | 4.51  | 0.0432 | H-1→L+3(+57%), H-0→L+6(+21%)                 |                              |
|                                       | 274.8                                 | 4.51  | 0.0156 | H-1→L+3(+35%), H-6→L+0(+32%), H-0→L+4(+28%)  |                              |
|                                       | 271.1                                 | 4.57  | 0.0003 | H-0→L+7(+50%), H-0→L+8(+14%), H-7→L+0(+13%)  |                              |
|                                       | 269.8                                 | 4.59  | 0.1712 | H-3→L+3(+52%)                                |                              |
|                                       | 268.6                                 | 4.62  | 0.0374 | H-1→L+4(+50%), H-1→L+5(+30%)                 |                              |
|                                       | 268.0                                 | 4.63  | 0.0267 | H-3→L+4(+38%), H-2→L+4(+14%), H-1→L+4(+11%)  |                              |
|                                       | 266.8                                 | 4.65  | 0.0390 | H-4→L+1(+36%), H-2→L+4(+33%), H-5→L+0(+17%)  |                              |
|                                       | 266.6                                 | 4.65  | 0.0026 | H-0→L+8(+41%), H-10→L+0(+26%), H-7→L+0(+26%) |                              |
|                                       | 265.7                                 | 4.67  | 0.0318 | H-4→L+1(+38%), H-2→L+5(+21%), H-3→L+4(+16%)  |                              |
|                                       | 264.7                                 | 4.68  | 0.0136 | H-3→L+5(+41%), H-3→L+4(+37%), H-2→L+5(+14%)  |                              |
| <b>TP<sup>1</sup>TtTP<sup>1</sup></b> | 410.7                                 | 3.02  | 1.9236 | H-0→L+0(+70%)                                |                              |
|                                       | 366.2                                 | 3.39  | 0.0153 | H-1→L+0(+62%), H-0→L+3(+18%), H-3→L+0(+14%)  |                              |
|                                       | 363.9                                 | 3.41  | 0.0176 | H-2→L+0(+61%), H-0→L+2(+20%), H-1→L+0(+11%)  |                              |
|                                       | 346.1                                 | 3.58  | 0.0049 | H-3→L+0(+56%), H-0→L+2(+21%), H-0→L+3(+14%)  |                              |
|                                       | 337.9                                 | 3.67  | 0.0204 | H-0→L+1(+65%), H-1→L+3(+11%), H-0→L+2(+11%)  |                              |
|                                       | 331.7                                 | 3.74  | 0.0861 | H-0→L+3(+43%), H-2→L+0(+27%), H-1→L+2(+10%)  |                              |
|                                       | 326.5                                 | 3.80  | 0.0194 | H-0→L+2(+44%), H-0→L+3(+29%), H-2→L+1(+14%)  |                              |
|                                       | 318.7                                 | 3.89  | 0.0514 | H-4→L+0(+55%), H-0→L+3(+23%), H-2→L+0(+10%)  |                              |
|                                       | 314.5                                 | 3.94  | 0.1085 | H-0→L+4(+42%), H-0→L+5(+31%), H-2→L+3(+17%)  |                              |
|                                       | 313.9                                 | 3.95  | 0.0125 | H-0→L+5(+42%), H-6→L+0(+18%), H-2→L+2(+16%)  |                              |
|                                       | 307.6                                 | 4.03  | 0.0301 | H-5→L+0(+66%)                                |                              |
|                                       | 303.9                                 | 4.08  | 0.0235 | H-1→L+1(+52%), H-4→L+0(+20%), H-3→L+2(+16%)  |                              |
|                                       | 303.2                                 | 4.09  | 0.0346 | H-2→L+2(+29%), H-1→L+2(+26%), H-0→L+4(+22%)  |                              |
|                                       | 302.2                                 | 4.10  | 0.0276 | H-1→L+3(+33%), H-0→L+5(+27%), H-0→L+4(+23%)  |                              |
|                                       | 297.7                                 | 4.16  | 0.0103 | H-2→L+1(+50%), H-2→L+2(+19%), H-6→L+0(+16%)  |                              |
|                                       | 293.5                                 | 4.22  | 0.0004 | H-6→L+0(+53%), H-1→L+4(+16%), H-1→L+5(+13%)  |                              |
|                                       | 292.1                                 | 4.24  | 0.0104 | H-3→L+1(+37%), H-1→L+5(+29%), H-7→L+0(+15%)  |                              |
|                                       | 289.5                                 | 4.28  | 0.0059 | H-7→L+0(+51%)                                |                              |
|                                       | 286.1                                 | 4.33  | 0.3945 | H-3→L+1(+42%), H-3→L+2(+16%), H-3→L+3(+13%)  |                              |
|                                       | 283.6                                 | 4.37  | 0.0039 | H-6→L+0(+30%), H-4→L+1(+27%), H-2→L+5(+18%)  |                              |
|                                       | 281.2                                 | 4.41  | 0.0335 | H-1→L+2(+56%)                                |                              |
|                                       | 279.4                                 | 4.44  | 0.0543 | H-2→L+3(+53%), H-1→L+3(+38%), H-2→L+5(+11%)  |                              |
|                                       | 274.7                                 | 4.51  | 0.0809 | H-4→L+1(+32%), H-3→L+2(+29%), H-1→L+4(+15%)  |                              |
|                                       | 273.3                                 | 4.54  | 0.1047 | H-3→L+2(+32%), H-3→L+3(+31%), H-3→L+5(+29%), |                              |
|                                       | 271.8                                 | 4.56  | 0.2146 | H-1→L+4(+26%), H-4→L+1(+26%), H-7→L+0(+18%)  |                              |
|                                       | 271.3                                 | 4.57  | 0.1932 | H-1→L+5(+36%), H-4→L+1(+35%), H-3→L+3(+27%)  |                              |
|                                       | 269.2                                 | 4.61  | 0.1370 | H-3→L+4(+30%), H-5→L+1(+29%), H-3→L+2(+19%)  |                              |
|                                       | 267.9                                 | 4.63  | 0.2762 | H-0→L+6(+29%), H-2→L+4(+28%), H-7→L+0(+27%)  |                              |
|                                       | 266.5                                 | 4.65  | 0.0846 | H-5→L+1(+55%), H-1→L+4(+17%), H-2→L+5(+13%)  |                              |
|                                       | 266.1                                 | 4.66  | 0.0594 | H-2→L+5(+36%), H-1→L+4(+34%), H-4→L+3(+30%)  |                              |
|                                       | <b>TP<sup>1</sup>BtTP<sup>1</sup></b> | 423.2 | 2.93   | 1.6740                                       | H-0→L+0(+70%)                |
|                                       |                                       | 371.2 | 3.34   | 0.0233                                       | H-1→L+0(+64%), H-1→L+1(+16%) |
|                                       |                                       | 368.4 | 3.37   | 0.3360                                       | H-2→L+0(+66%)                |
| 364.2                                 |                                       | 3.40  | 0.0527 | H-3→L+0(+61%), H-2→L+3(+11%)                 |                              |
| 356.5                                 |                                       | 3.48  | 0.0583 | H-0→L+1(+63%)                                |                              |
| 348.3                                 |                                       | 3.56  | 0.0338 | H-4→L+0(+56%), H-0→L+1(+24%), H-0→L+2(+18%)  |                              |
| 334.7                                 |                                       | 3.70  | 0.0448 | H-0→L+2(+60%), H-1→L+0(+17%)                 |                              |
| 331.6                                 |                                       | 3.74  | 0.0222 | H-0→L+3(+59%), H-3→L+0(+27%), H-3→L+1(+15%)  |                              |
| 324.8                                 |                                       | 3.82  | 0.0055 | H-0→L+4(+62%), H-5→L+0(+19%), H-3→L+0(+10%)  |                              |
| 317.2                                 |                                       | 3.91  | 0.2016 | H-5→L+0(+49%), H-0→L+2(+12%), H-2→L+2(+10%)  |                              |
| 316.5                                 |                                       | 3.92  | 0.0024 | H-1→L+1(+46%)                                |                              |
| 314.1                                 |                                       | 3.95  | 0.0008 | H-2→L+1(+63%), H-3→L+3(+17%), H-0→L+3(+13%)  |                              |
| 311.7                                 |                                       | 3.98  | 0.0222 | H-0→L+5(+48%), H-1→L+1(+32%), H-0→L+2(+17%)  |                              |
| 310.1                                 |                                       | 4.00  | 0.0163 | H-3→L+1(+45%), H-3→L+0(+11%), H-2→L+1(+11%)  |                              |
| 305.6                                 |                                       | 4.06  | 0.0097 | H-5→L+0(+35%), H-1→L+2(+28%), H-4→L+1(+27%)  |                              |

|  |       |      |        |                                             |
|--|-------|------|--------|---------------------------------------------|
|  | 300.6 | 4.12 | 0.0020 | H-1→L+5(+32%), H-3→L+3(+28%), H-4→L+1(+22%) |
|  | 300.1 | 4.13 | 0.0031 | H-6→L+0(+40%), H-1→L+5(+27%), H-4→L+1(+19%) |
|  | 297.1 | 4.17 | 0.0534 | H-3→L+4(+35%), H-3→L+1(+33%), H-4→L+1(+24%) |
|  | 296.3 | 4.18 | 0.0309 | H-7→L+0(+45%), H-2→L+4(+20%), H-0→L+4(+14%) |
|  | 294.5 | 4.21 | 0.5067 | H-0→L+6(+47%), H-4→L+1(+31%), H-2→L+1(+12%) |
|  | 289.8 | 4.28 | 0.0666 | H-6→L+0(+37%), H-3→L+3(+26%), H-4→L+2(+19%) |
|  | 287.0 | 4.32 | 0.0212 | H-2→L+2(+61%), H-4→L+1(+11%)                |
|  | 284.9 | 4.35 | 0.0251 | H-2→L+4(+52%), H-3→L+3(+22%), H-3→L+4(+17%) |
|  | 283.4 | 4.37 | 0.2069 | H-2→L+3(+49%), H-3→L+1(+20%), H-7→L+0(+17%) |
|  | 280.9 | 4.41 | 0.0181 | H-1→L+3(+59%), H-4→L+2(+18%), H-1→L+5(+16%) |
|  | 279.8 | 4.43 | 0.1156 | H-1→L+3(+30%), H-7→L+0(+23%), H-4→L+5(+23%) |
|  | 278.4 | 4.45 | 0.3152 | H-3→L+2(+32%), H-1→L+3(+16%), H-2→L+5(+15%) |
|  | 277.4 | 4.47 | 0.1068 | H-3→L+2(+57%), H-4→L+2(+28%), H-1→L+5(+15%) |
|  | 277.2 | 4.47 | 0.5535 | H-0→L+7(+41%), H-4→L+5(+24%), H-5→L+1(+15%) |
|  | 274.8 | 4.51 | 0.0860 | H-8→L+0(+30%), H-2→L+6(+21%), H-0→L+7(+20%) |

<sup>a</sup>H = HOMO, L = LUMO, H-n = HOMO-n and L+n = LUMO+n.

## 8. POM

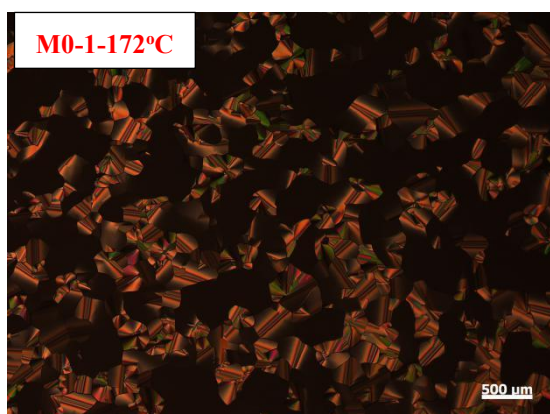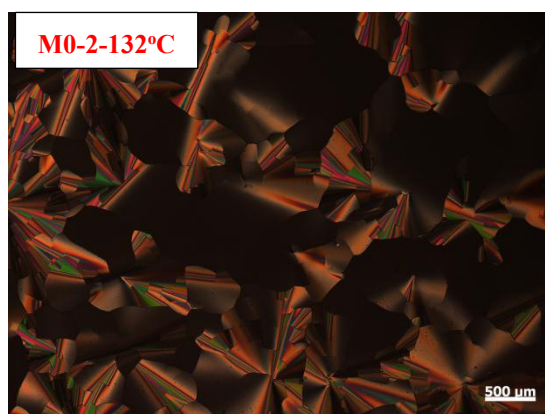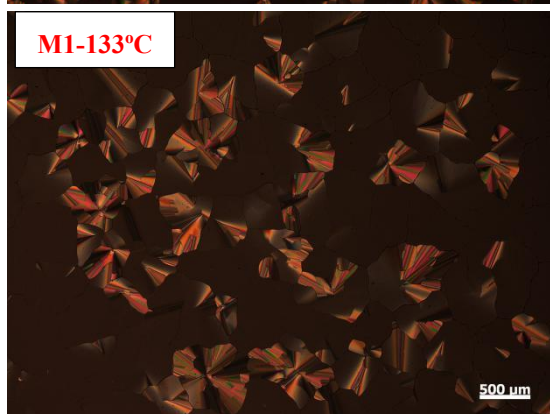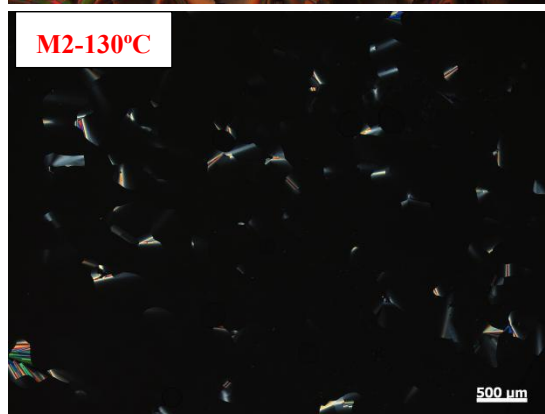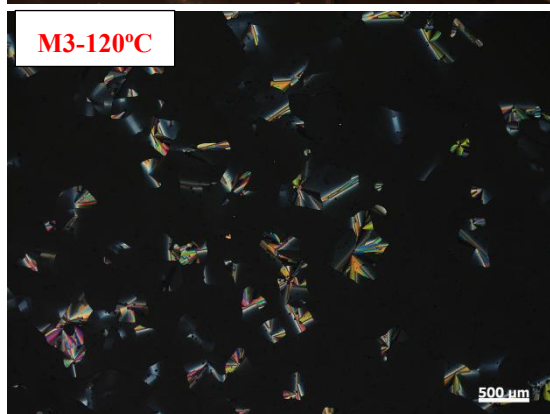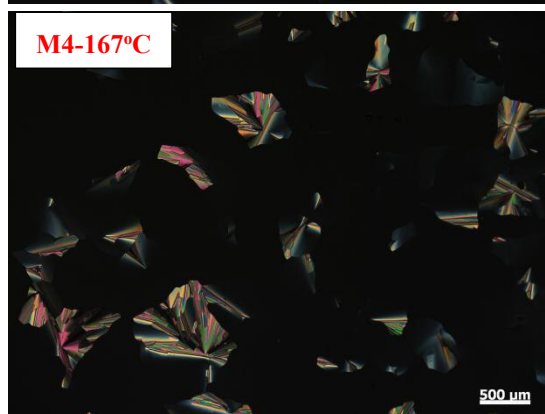

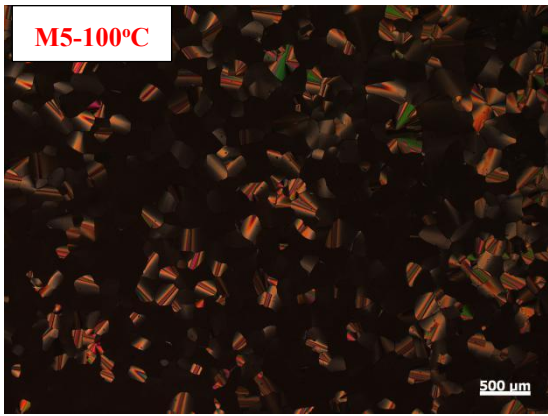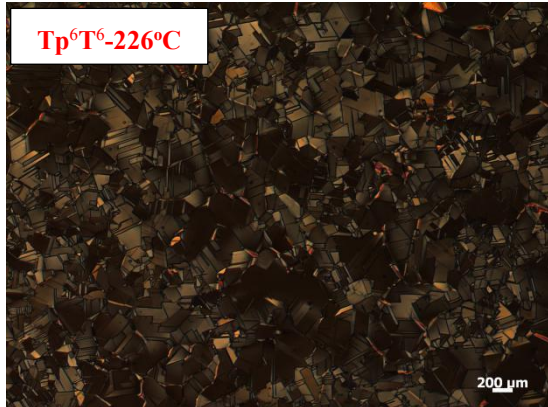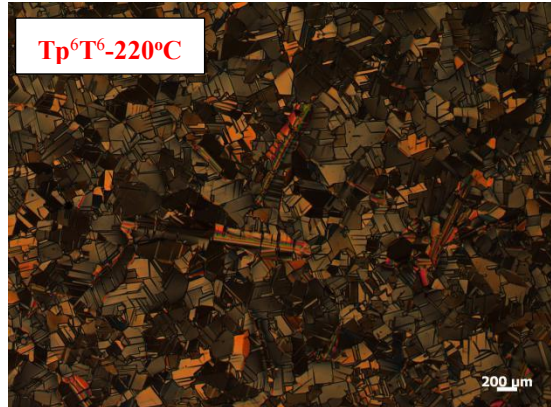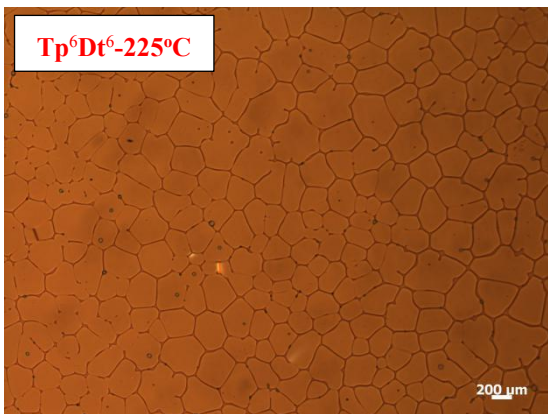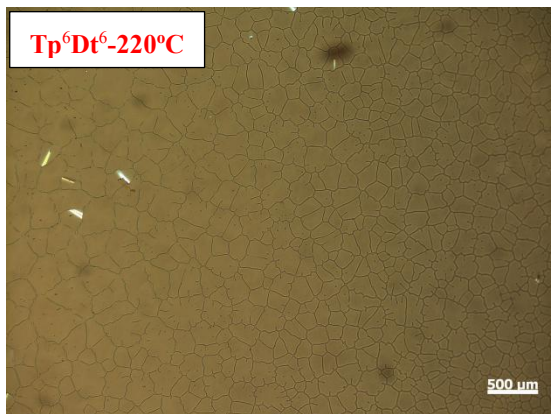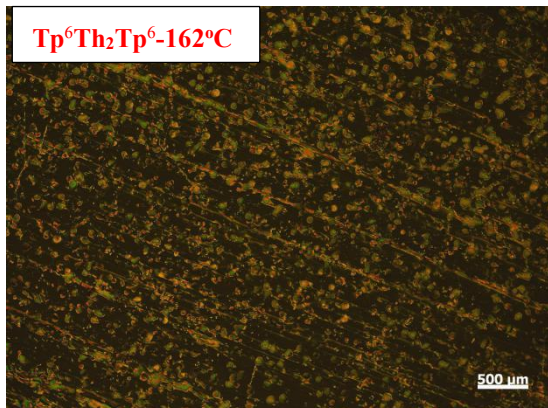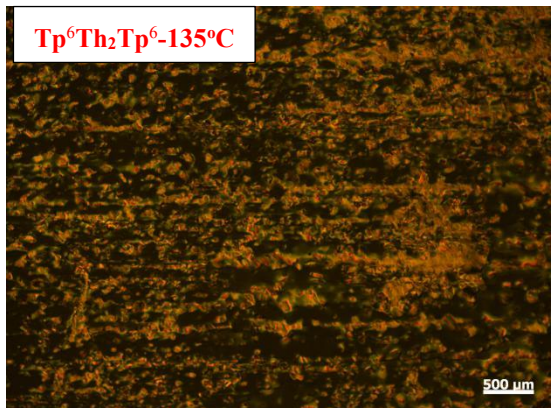

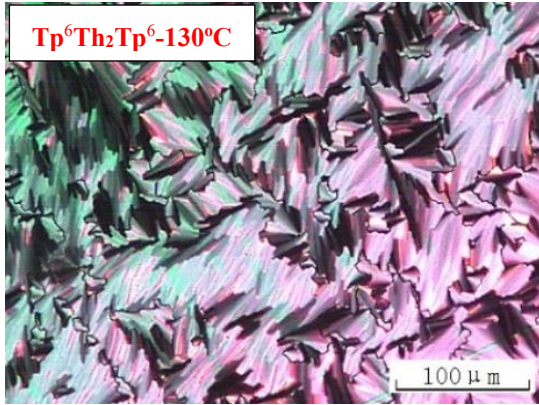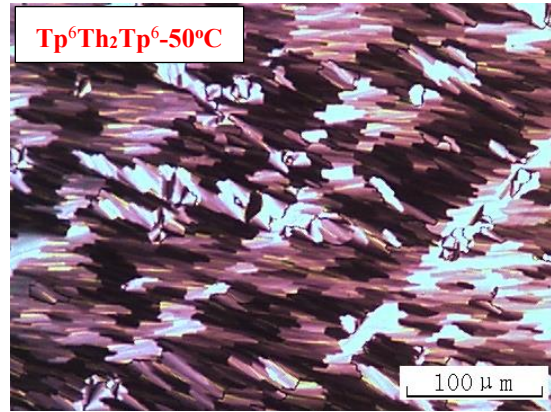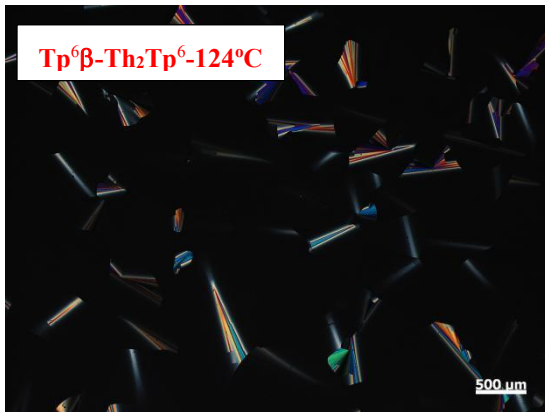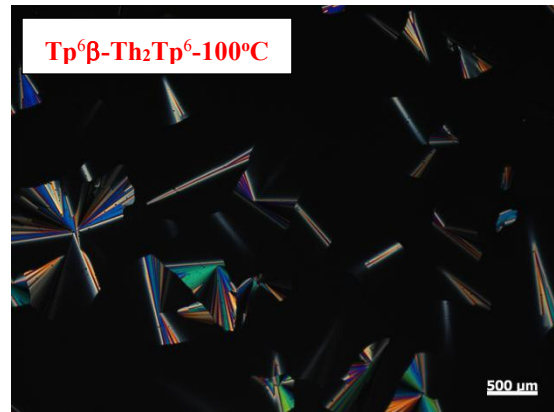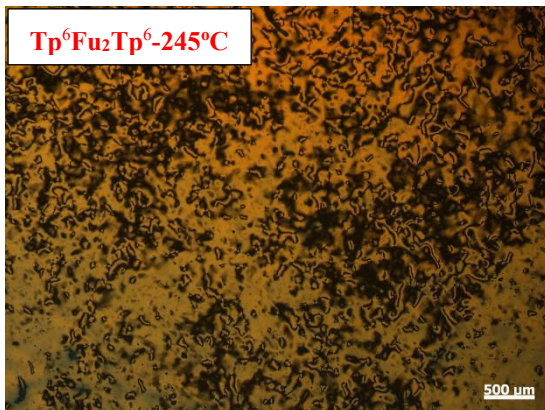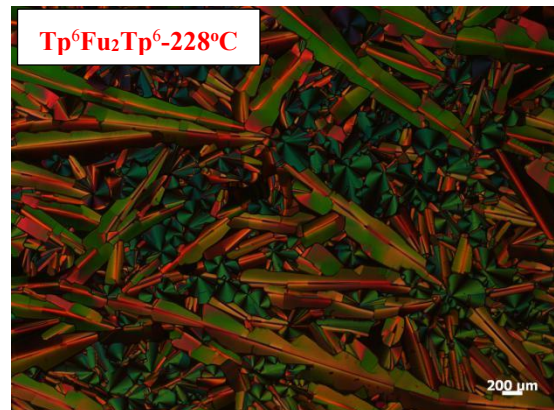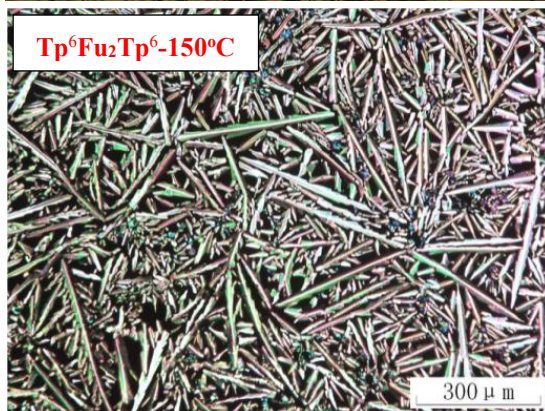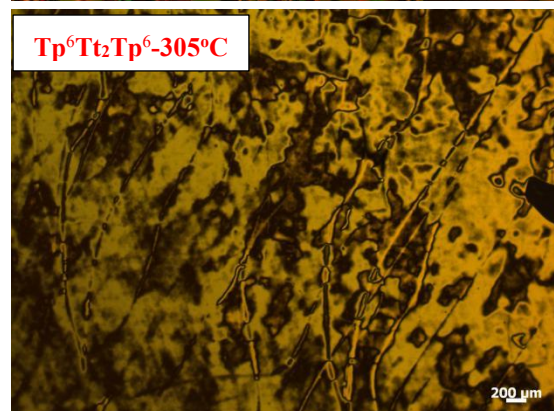

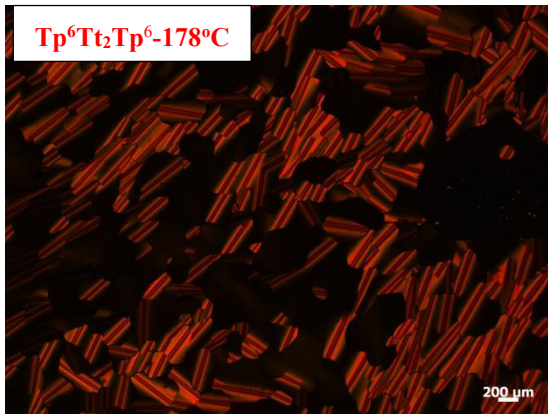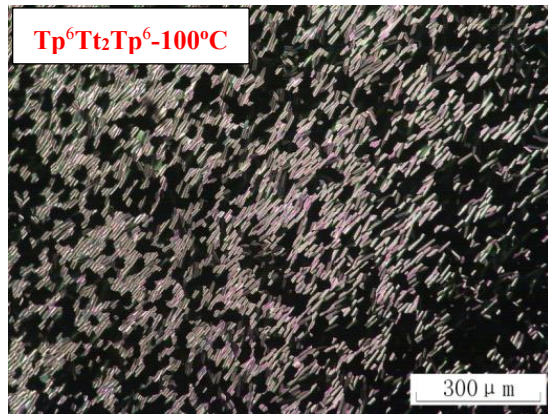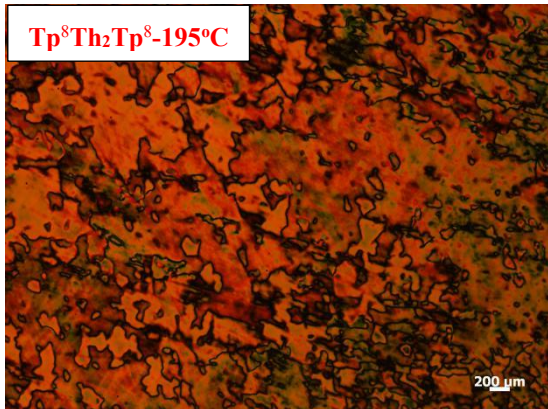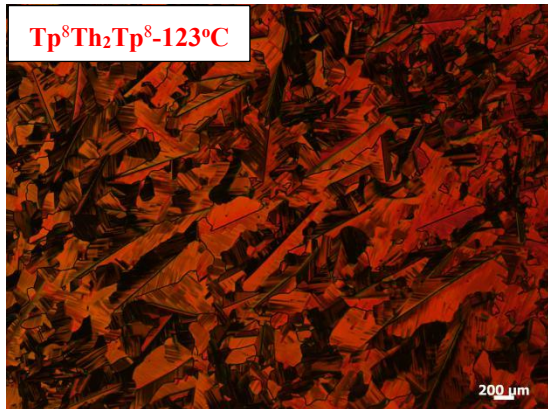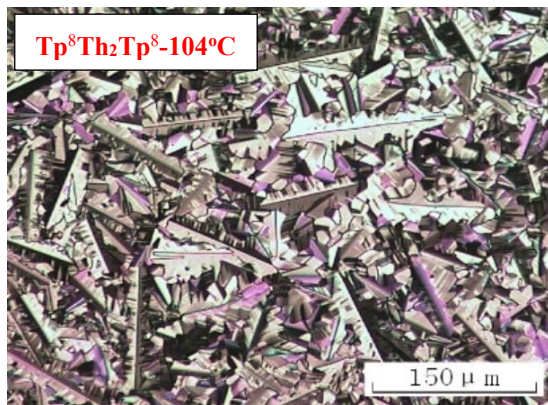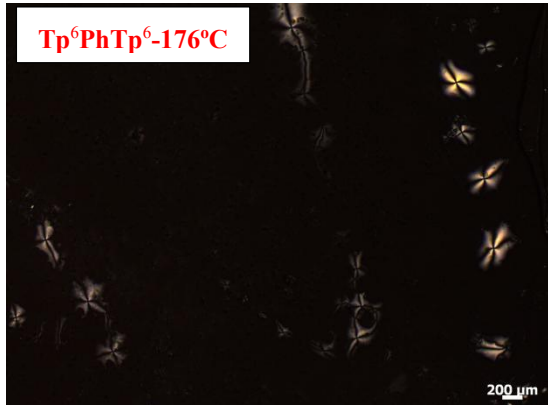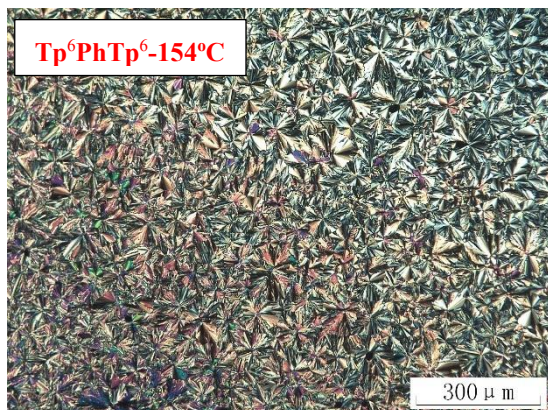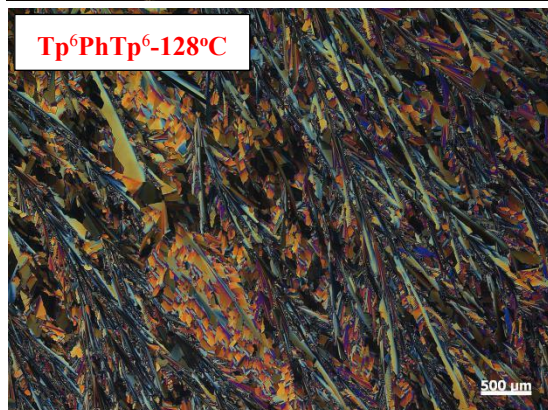

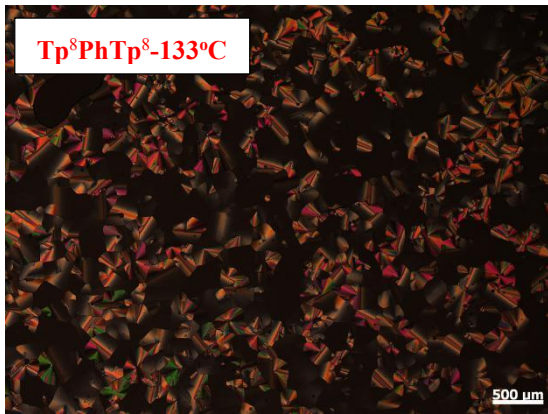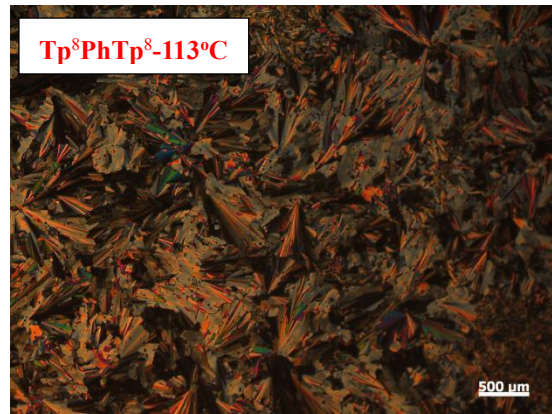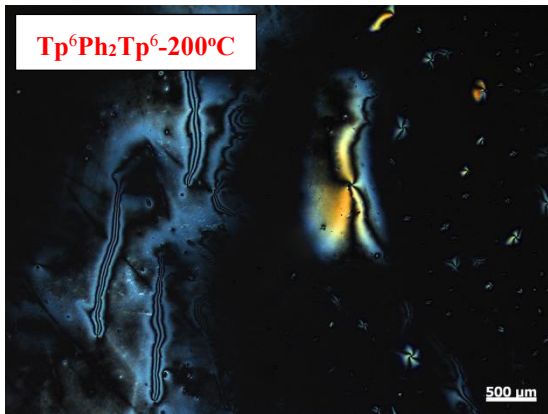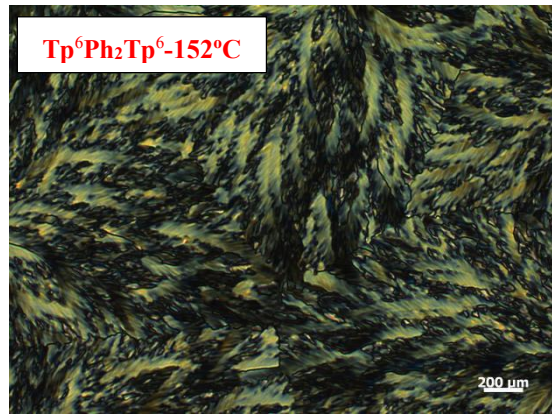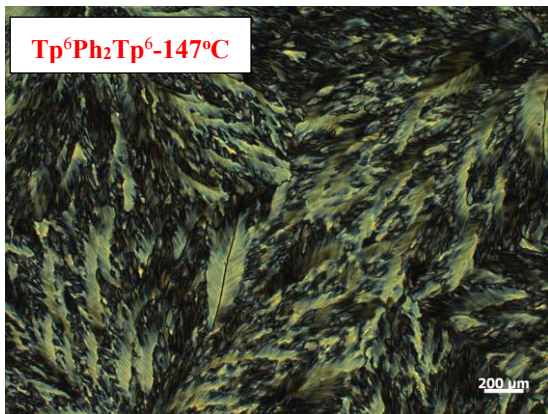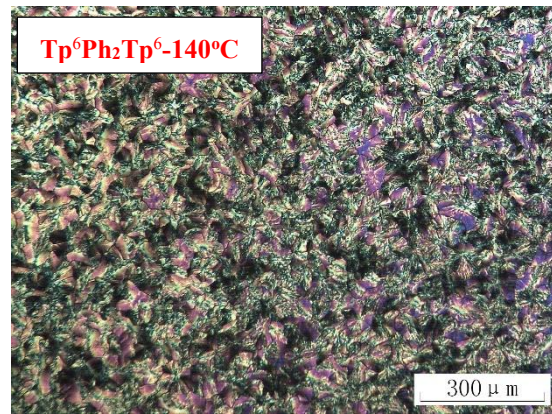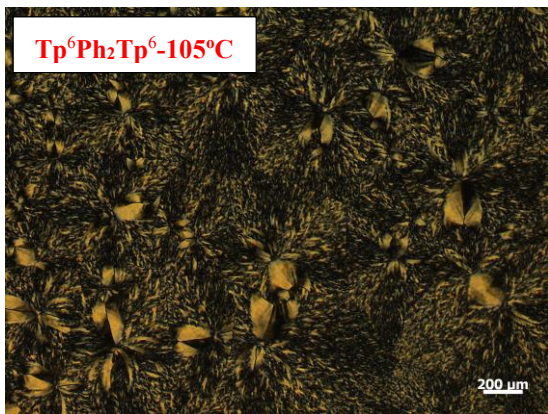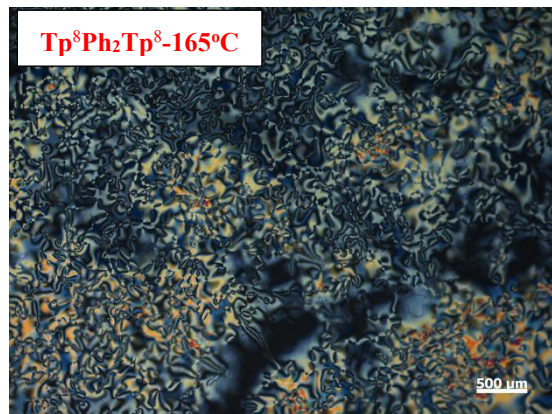



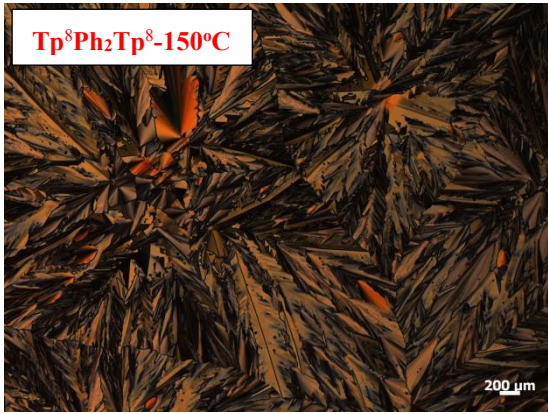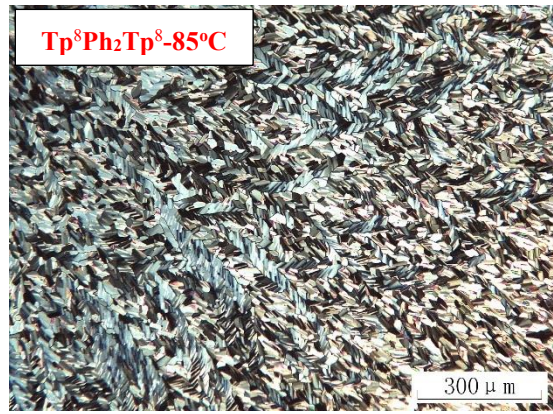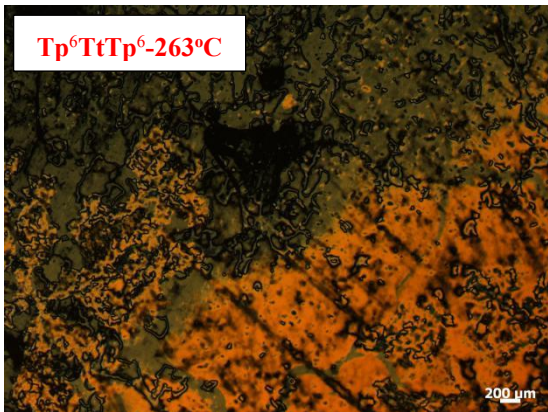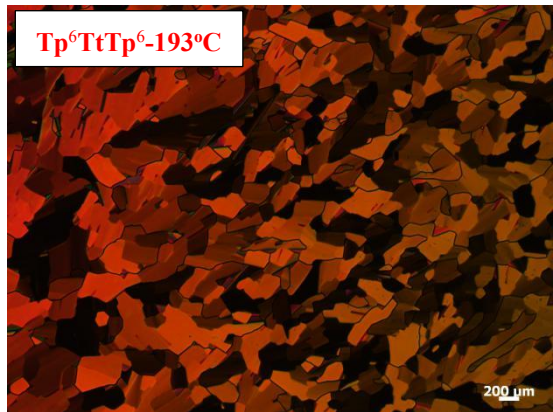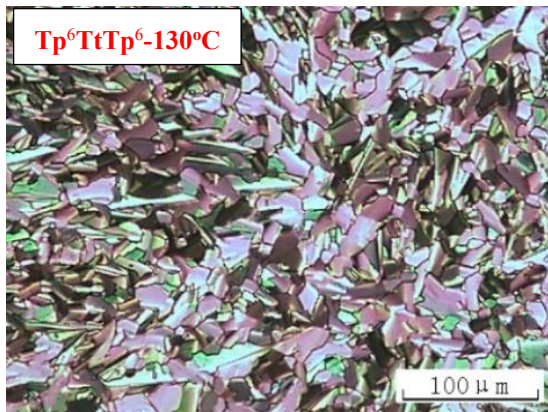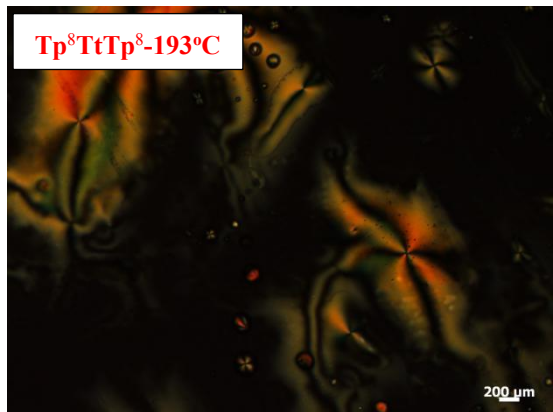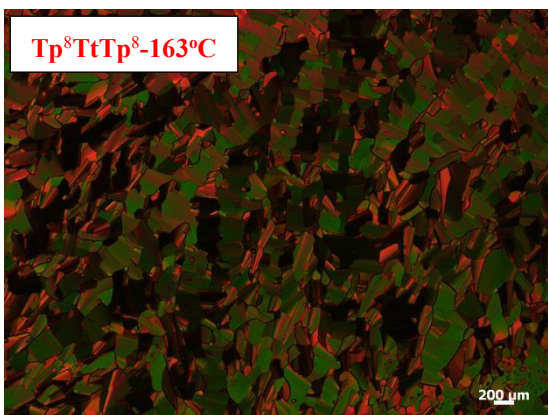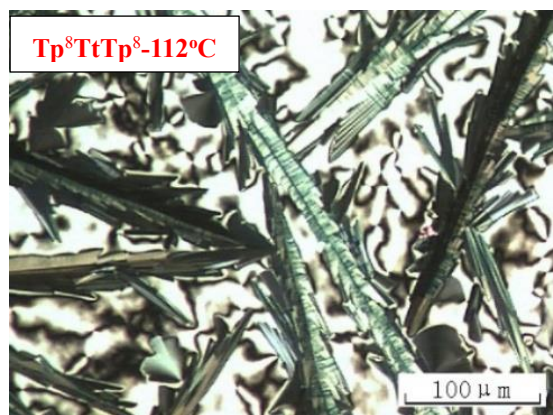

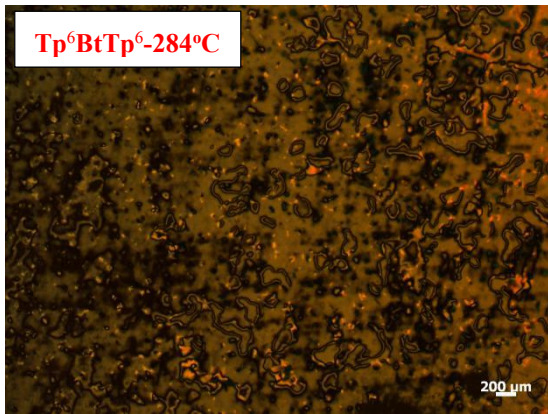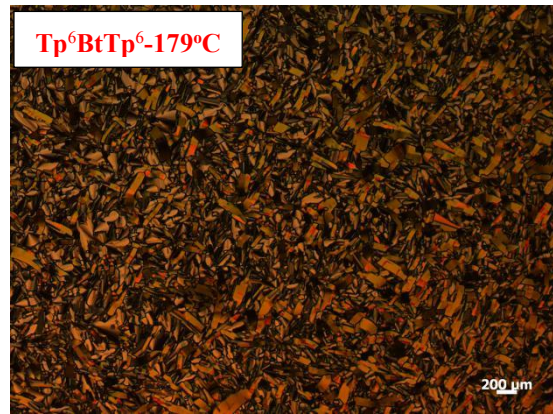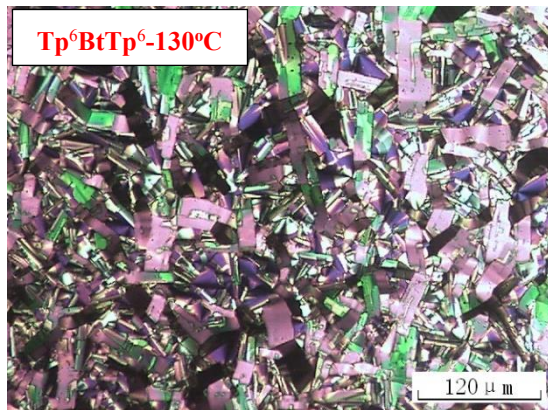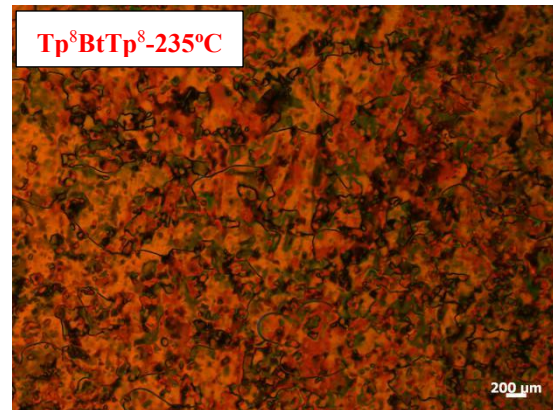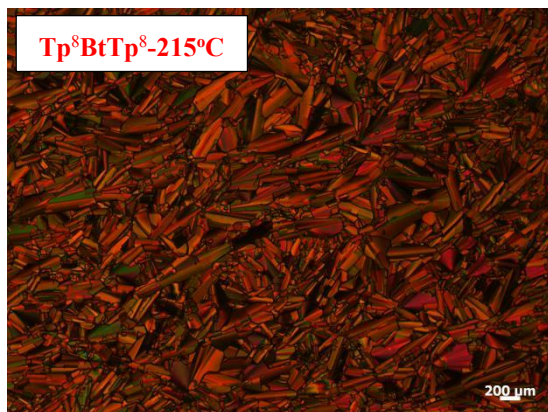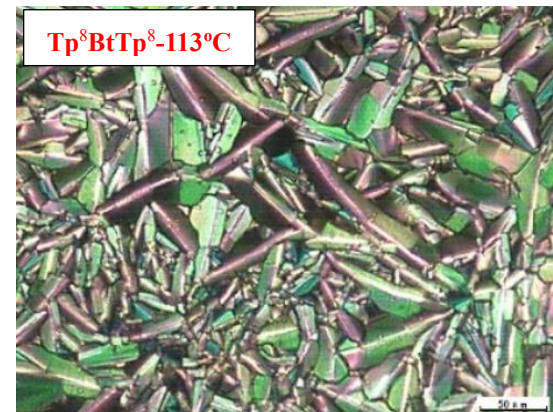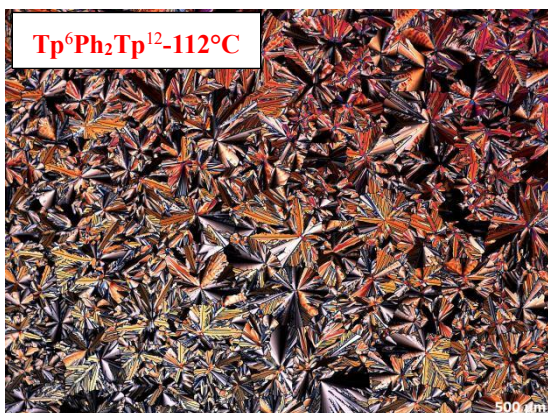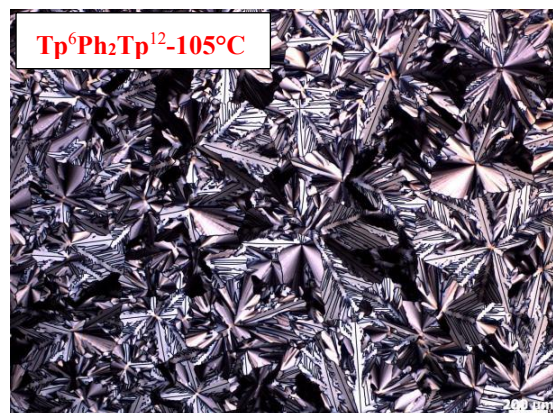

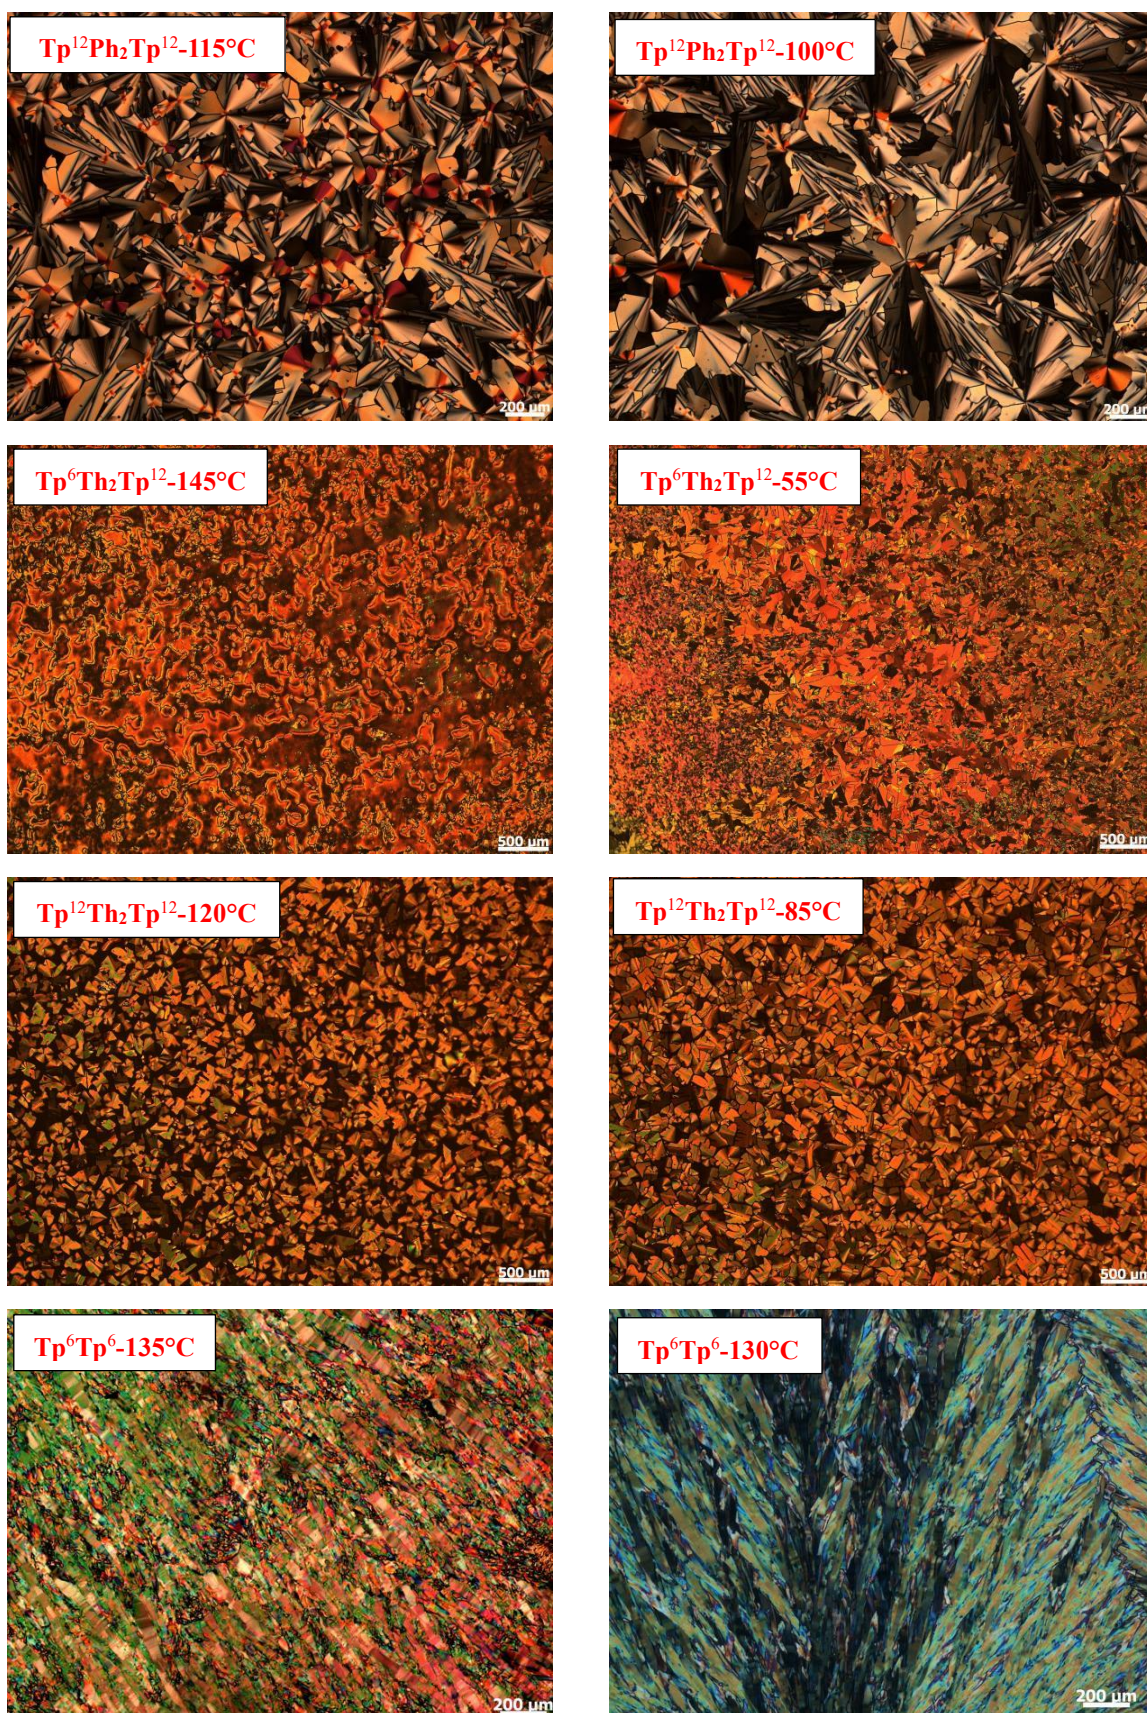

**Figure S61.** POM images of the mesophases of the triphenylene-based precursors, monomers, unsymmetrical dimers and  $\pi$ -bridged dimers, at various temperatures. Note that some temperature shifts may occur due to small variations in the calibration of the measuring devices (DSC and POM). All these microscopic observations were made on slow cooling from the isotropic liquid.

## 9. TGA

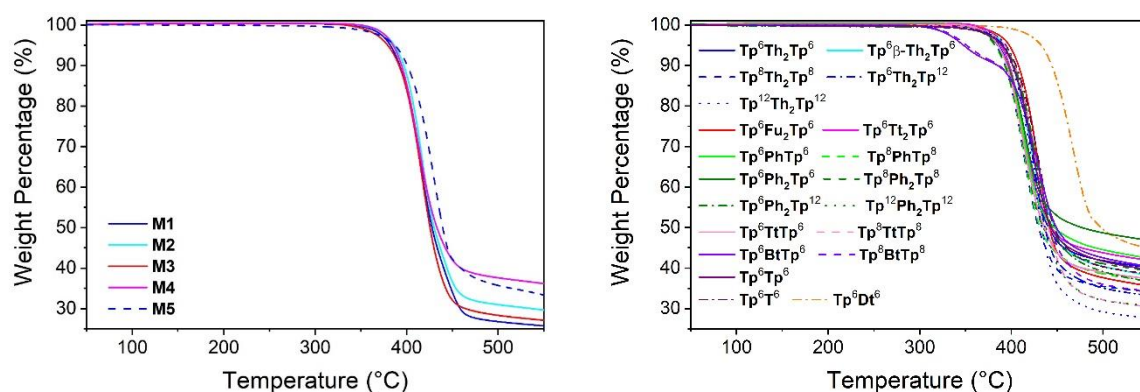

Figure S62. From top to bottom, TGA curves of monomeric (M1-M5) and dimeric compounds.

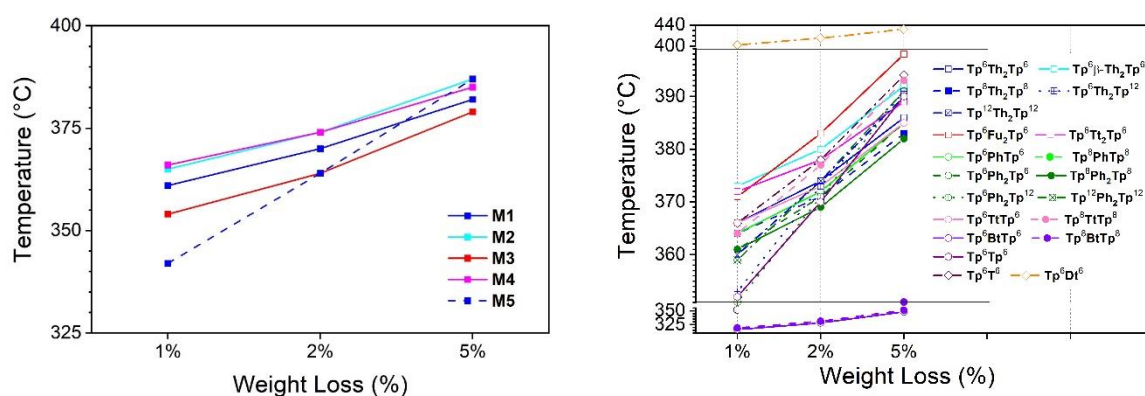

Figure S63. From top to bottom, weight loss % variation with temperature of monomeric (M1-M5) and dimeric compounds.

Table S7. Decomposition temperatures (TGA) of M1-M5 monomers and dimeric DLCs.

| Compound                                          | T <sub>dec.</sub> /°C (1% loss) | T <sub>dec.</sub> /°C (2% loss) | T <sub>dec.</sub> /°C (5% loss) |
|---------------------------------------------------|---------------------------------|---------------------------------|---------------------------------|
| M1                                                | 361                             | 370                             | 382                             |
| M2                                                | 365                             | 374                             | 387                             |
| M3                                                | 354                             | 364                             | 379                             |
| M4                                                | 366                             | 374                             | 385                             |
| M5                                                | 342                             | 364                             | 387                             |
| Tp <sup>6</sup> Th <sub>2</sub> Tp <sup>6</sup>   | 366                             | 374                             | 386                             |
| Tp <sup>6</sup> β-Th <sub>2</sub> Tp <sup>6</sup> | 373                             | 380                             | 392                             |
| Tp <sup>6</sup> Fu <sub>2</sub> Tp <sup>6</sup>   | 371                             | 383                             | 398                             |
| Tp <sup>6</sup> Tt <sub>2</sub> Tp <sup>6</sup>   | 372                             | 378                             | 389                             |
| Tp <sup>8</sup> Th <sub>2</sub> Tp <sup>8</sup>   | 364                             | 371                             | 383                             |
| Tp <sup>6</sup> T <sup>6</sup>                    | 366                             | 378                             | 394                             |
| Tp <sup>6</sup> Dt <sup>6</sup>                   | 402                             | 415                             | 432                             |
| Tp <sup>6</sup> PhTp <sup>6</sup>                 | 364                             | 372                             | 385                             |
| Tp <sup>8</sup> PhTp <sup>8</sup>                 | 361                             | 369                             | 382                             |
| Tp <sup>6</sup> Ph <sub>2</sub> Tp <sup>6</sup>   | 361                             | 371                             | 385                             |
| Tp <sup>8</sup> Ph <sub>2</sub> Tp <sup>8</sup>   | 361                             | 369                             | 382                             |
| Tp <sup>6</sup> TtTp <sup>6</sup>                 | 366                             | 373                             | 385                             |
| Tp <sup>8</sup> TtTp <sup>8</sup>                 | 364                             | 377                             | 393                             |
| Tp <sup>6</sup> BtTp <sup>6</sup>                 | 316                             | 328                             | 348                             |
| Tp <sup>8</sup> BtTp <sup>8</sup>                 | 319                             | 331                             | 351                             |
| Tp <sup>6</sup> Ph <sub>2</sub> Tp <sup>12</sup>  | 351                             | 371                             | 391                             |
| T <sup>12</sup> Ph <sub>2</sub> Tp <sup>12</sup>  | 359                             | 374                             | 391                             |
| Tp <sup>6</sup> Th <sub>2</sub> Tp <sup>12</sup>  | 353                             | 373                             | 391                             |
| T <sup>12</sup> Th <sub>2</sub> Tp <sup>12</sup>  | 360                             | 374                             | 390                             |
| Tp <sup>6</sup> Tp <sup>6</sup>                   | 352                             | 370                             | 390                             |

T<sub>dec.</sub>: Temperature at 1, 2 and 5% weight-loss.

10. DSC (heating/cooling rate 10 °C/min)

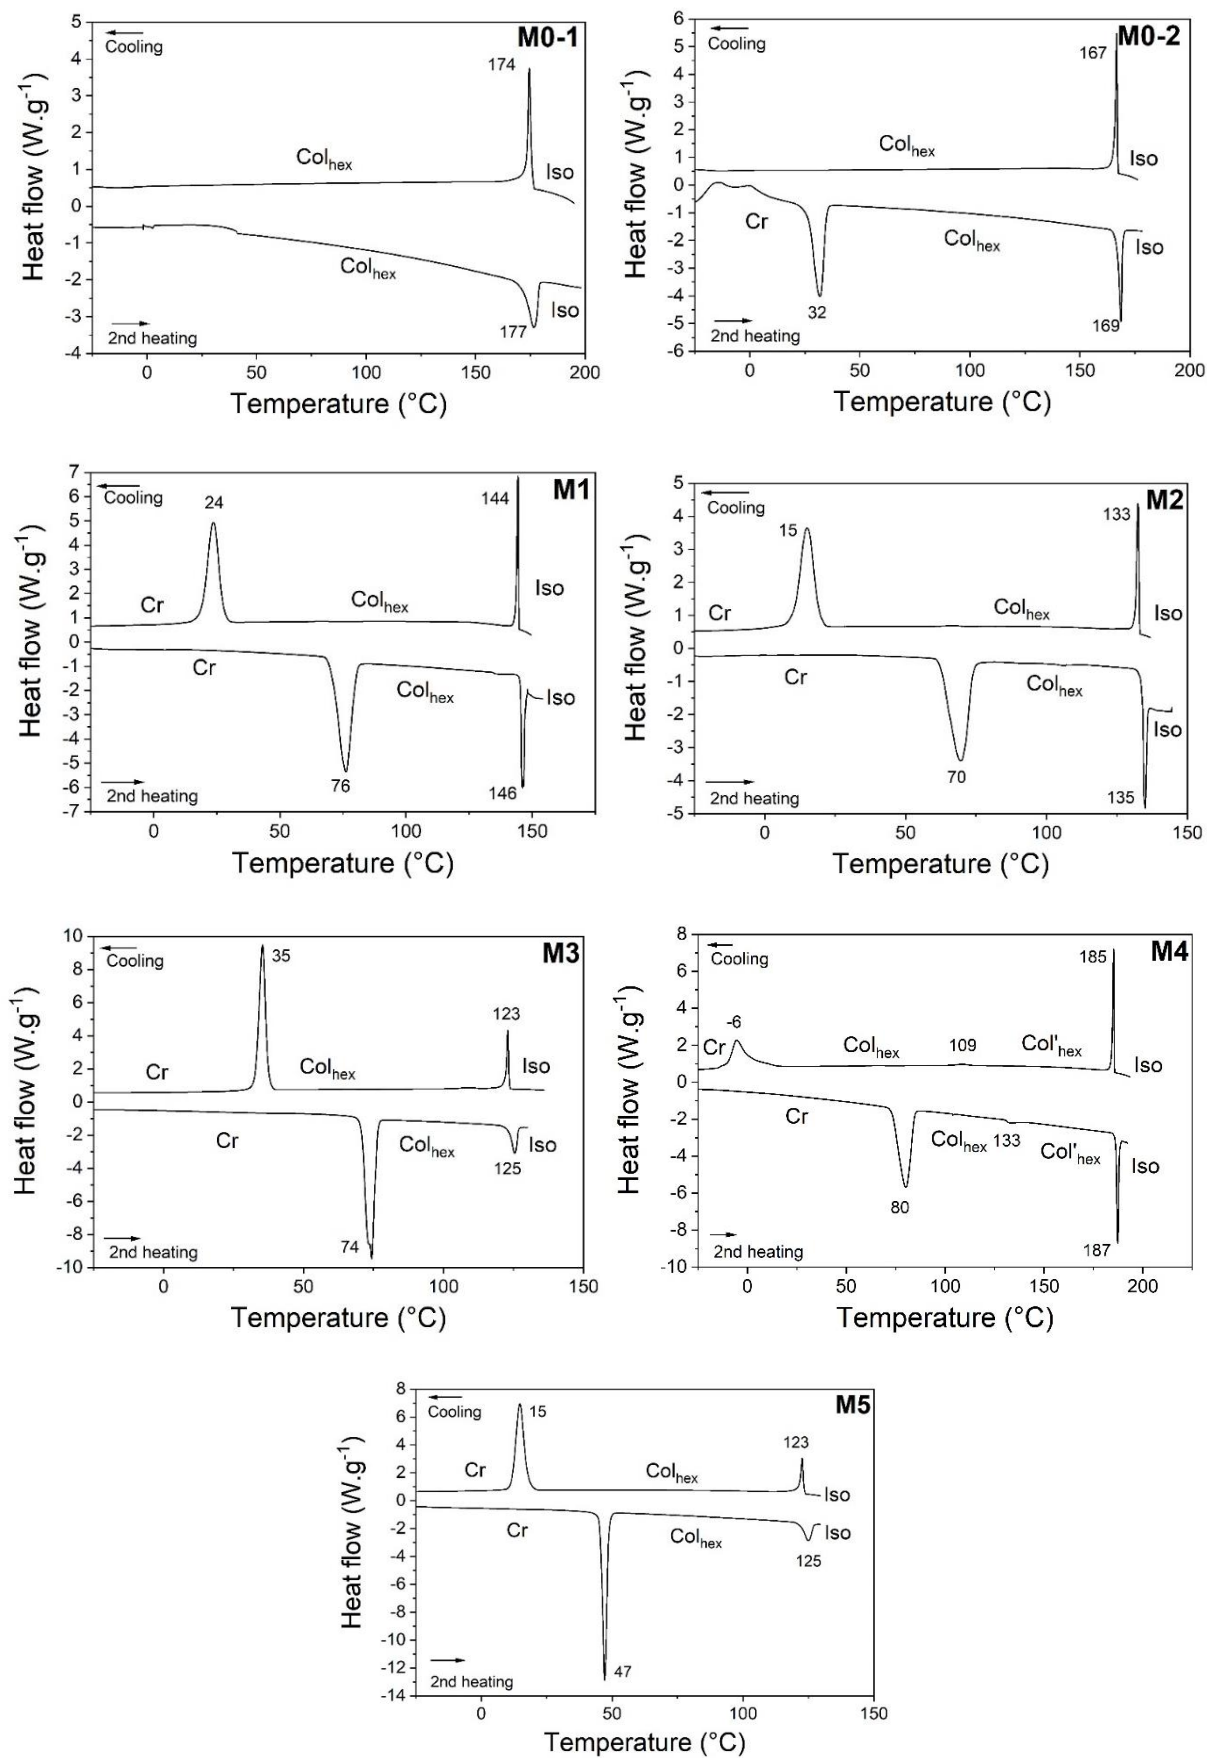

Figure S64. DSC curves of intermediates M0 and monomers M1-M5.

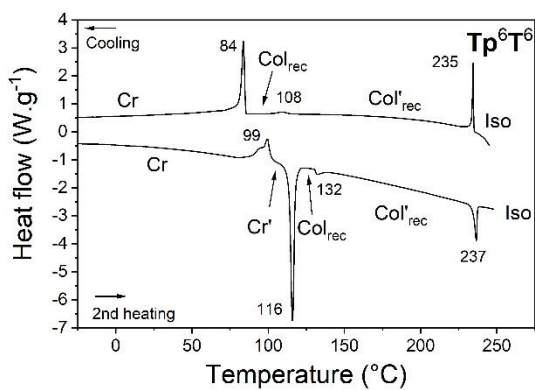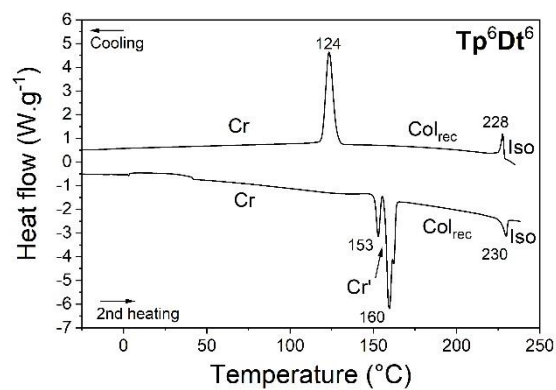

Figure S65. DSC curves of the unsymmetrical dimeric compounds  $\text{Tp}^6\text{T}^6$  and  $\text{Tp}^6\text{Dt}^6$ .

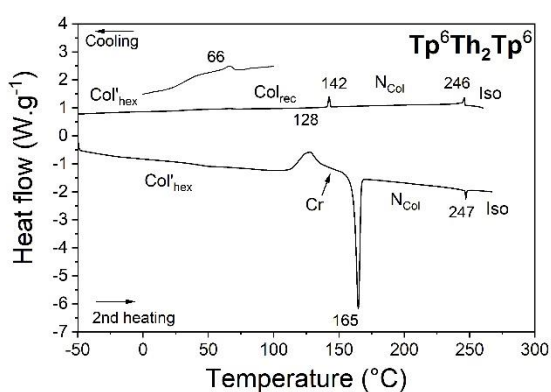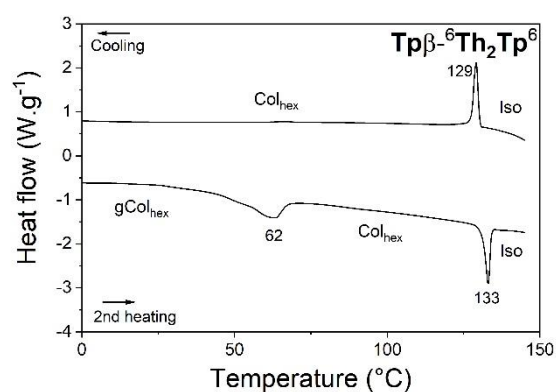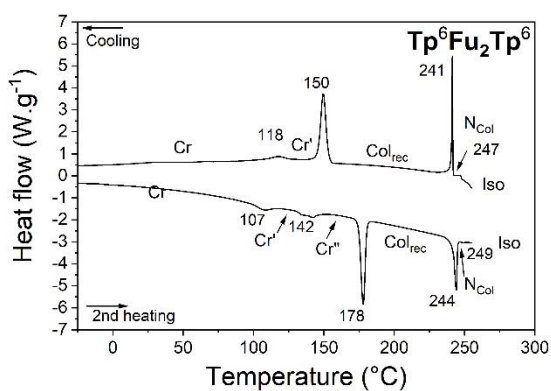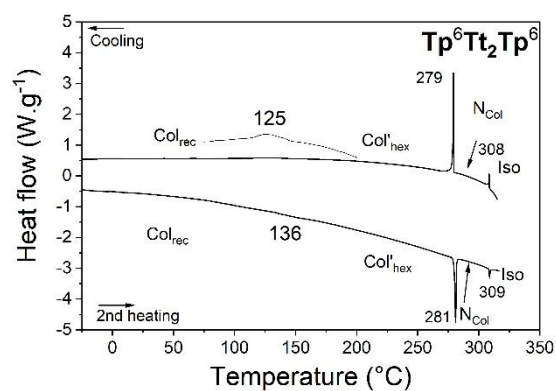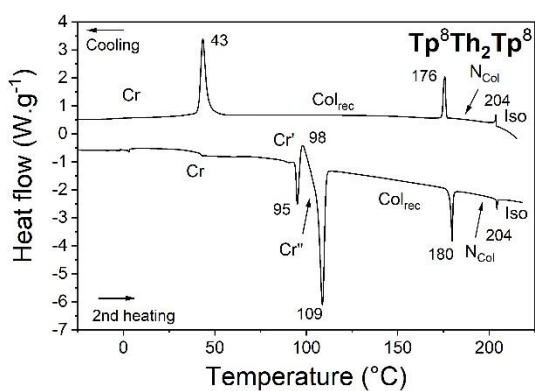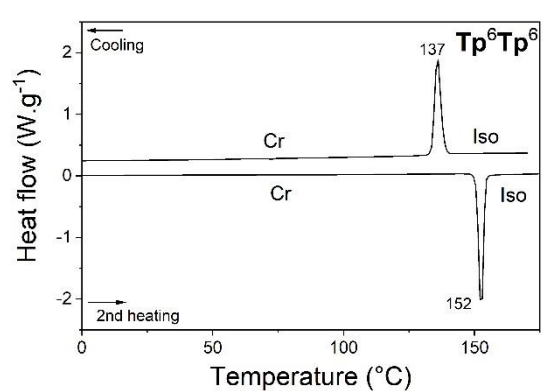

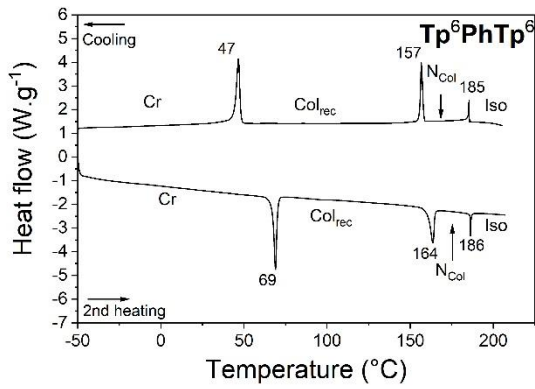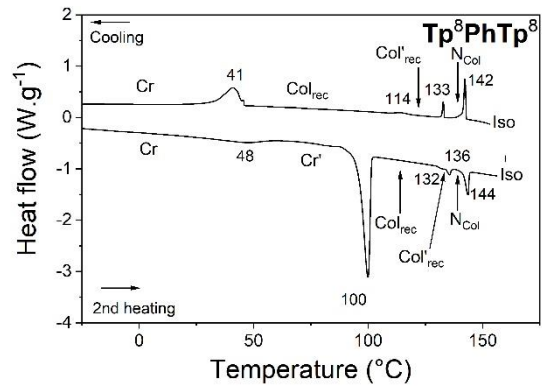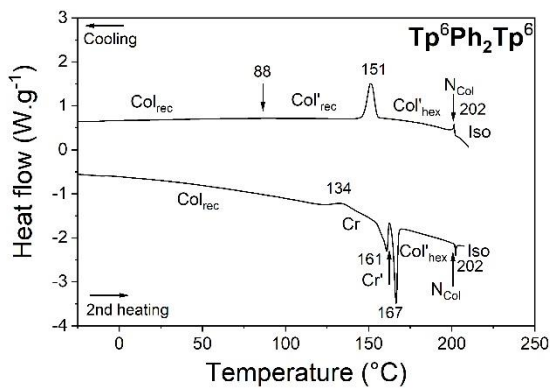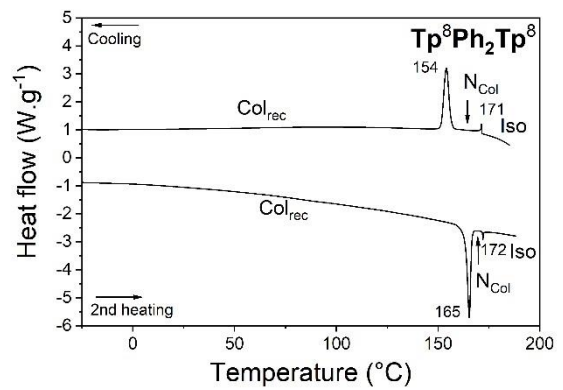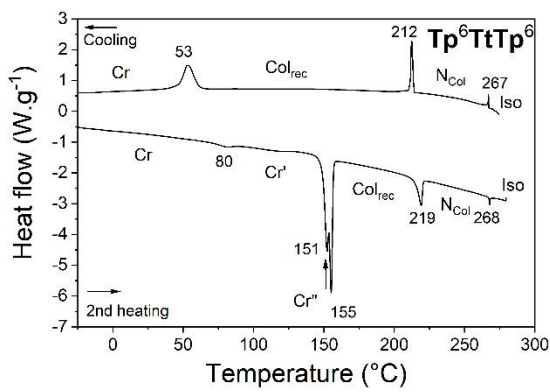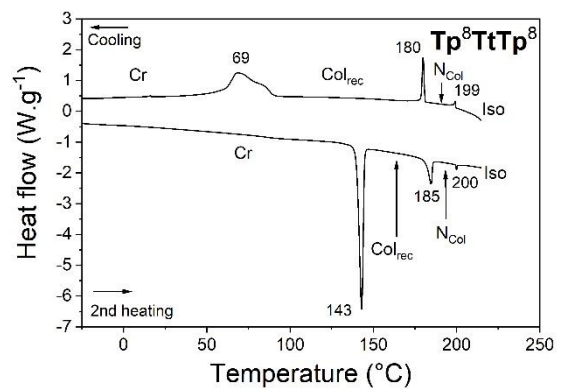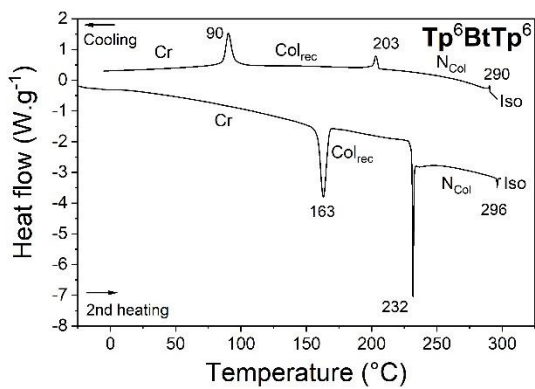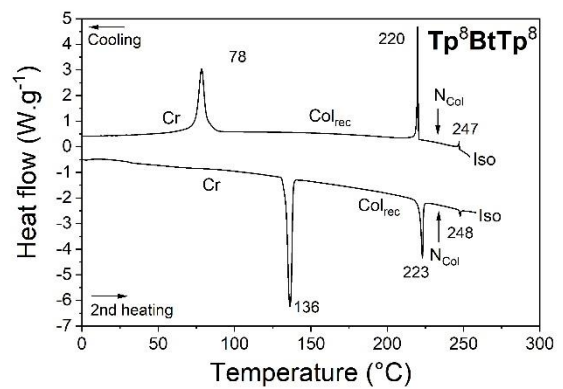

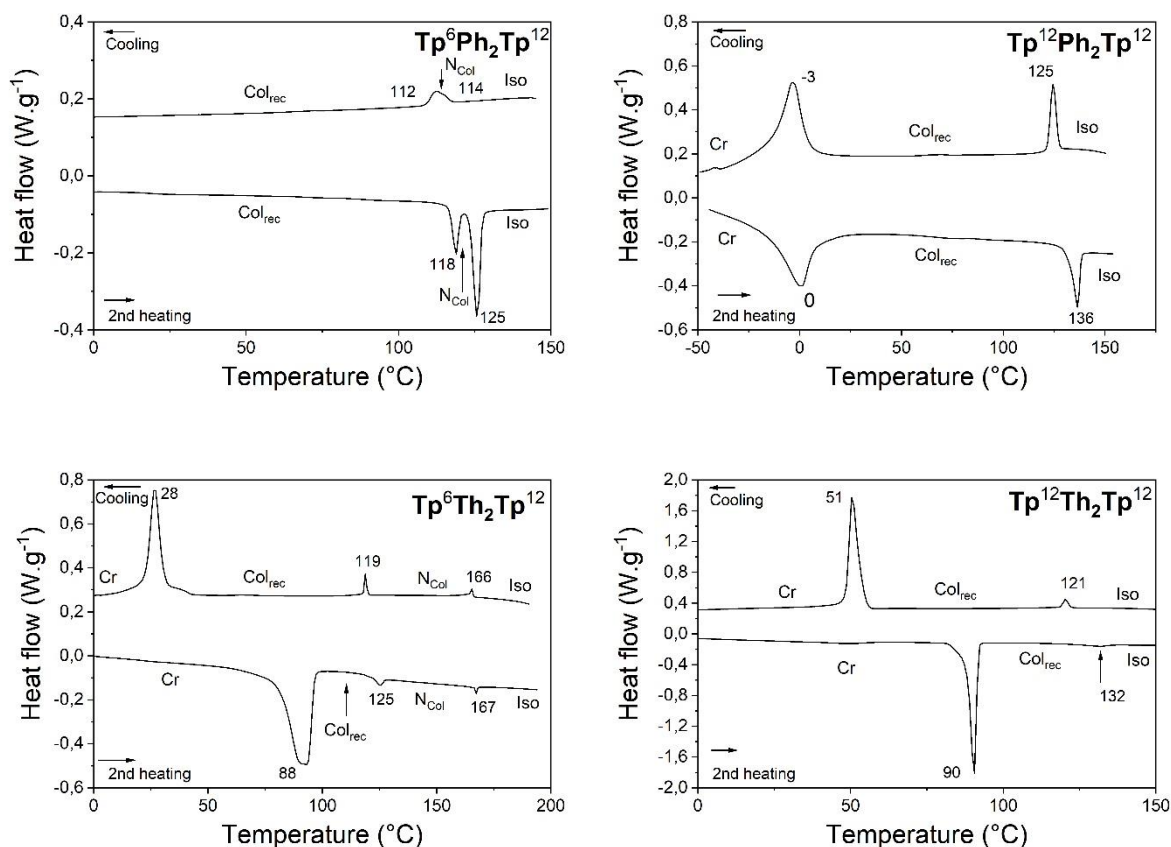

**Figure S66.** DSC curves of dimeric DLC compounds.

**Table S8.** Phase transition temperatures and associated enthalpy changes of monomeric precursors (**M0-M5**) and dimeric  $\sigma$ - and  $\pi$ -bridged triphenylenes (heating and cooling rates of 10°C/min).

| Cpds                                                                 | Second heating {First heating}<br>/ °C ( $\Delta H$ , kJ·mol <sup>-1</sup> ; $\Delta C_p$ , kJ·mol <sup>-1</sup> K <sup>-1</sup> )* | First cooling<br>/ °C ( $\Delta H$ , kJ·mol <sup>-1</sup> )                                                         |
|----------------------------------------------------------------------|-------------------------------------------------------------------------------------------------------------------------------------|---------------------------------------------------------------------------------------------------------------------|
| <b>M0-1</b>                                                          | Col <sub>hex</sub> 177 (11.6) I                                                                                                     | I 174 (-12.0) Col <sub>hex</sub>                                                                                    |
| <b>M0-2</b>                                                          | Cr 32 (38.1) Col <sub>hex</sub> 169 (13.2) I                                                                                        | I 167 (-13.6) Col <sub>hex</sub>                                                                                    |
| <b>M1</b>                                                            | Cr 76 (37.8) Col <sub>hex</sub> 146 (8.9) I                                                                                         | I 144 (-8.1) Col <sub>hex</sub> 24 (-31.8) Cr                                                                       |
| <b>M2</b>                                                            | Cr 70 (35.1) Col <sub>hex</sub> 135 (7.1) I                                                                                         | I 133 (-6.9) Col <sub>hex</sub> 15 (-28.2) Cr                                                                       |
| <b>M3</b>                                                            | Cr 74 (43.8) Col <sub>hex</sub> 125 (5.1) I                                                                                         | I 123 (-5.0) Col <sub>hex</sub> 35 (-36.6) Cr                                                                       |
| <b>M4</b>                                                            | Cr 80 (40.5) Col <sub>hex</sub> 133 (-) Col <sub>hex</sub> ' 187 (10.4) I                                                           | I 185 (-10.0) Col <sub>hex</sub> ' 109 (-) Col <sub>hex</sub> -6 (-21.3) Cr                                         |
| <b>M5</b>                                                            | Cr 47 (42.6) Col <sub>hex</sub> 125 (6.4) I                                                                                         | I 123 (-6.5) Col <sub>hex</sub> 15 (-38.5) Cr                                                                       |
| <b>Tp<sup>6</sup>T<sup>6</sup></b>                                   | Cr 99 (-14.9) Cr' 116 (47.2) Col <sub>rec</sub> 132 (1.6) Col <sub>rec</sub> ' 237 (7.3) I                                          | I 235 (-6.8) Col <sub>rec</sub> ' 108 (-1.4) Col <sub>rec</sub> 84 (-20.9) Cr                                       |
| <b>Tp<sup>6</sup>Dt<sup>6</sup></b>                                  | Cr 153 (11.1) Cr' 160 (50.1) Col <sub>rec</sub> 230 (5.5) I                                                                         | I 228 (-5.8) Col <sub>rec</sub> 124 (-51.5) Cr                                                                      |
| <b>Tp<sup>6</sup>Th<sub>2</sub>Tp<sup>6</sup></b>                    | Col <sub>hex</sub> ' 128 (-26.7) Cr 165 (49.6) N <sub>Col</sub> 247 (0.9) I                                                         | I 246 (-1.4) N <sub>Col</sub> 142 (-1.5) Col <sub>rec</sub> 66 (-0.5) Col <sub>hex</sub>                            |
| <b>Tp<sup>6</sup><math>\beta</math>-Th<sub>2</sub>Tp<sup>6</sup></b> | gCol <sub>hex</sub> 62 (0.03)* Col <sub>hex</sub> 133 (7.2) I                                                                       | I 129 (-7.5) Col <sub>hex</sub>                                                                                     |
| <b>Tp<sup>6</sup>Fu<sub>2</sub>Tp<sup>6</sup></b>                    | Cr 107 (4.8) Cr' 142 (6.3) Cr'' 178 (43.2) Col <sub>rec</sub> 244 (17.0) <sup>†</sup> N <sub>Col</sub> 249 (-) I                    | I 247 (-1.0) N <sub>Col</sub> 241 (-16.6) Col <sub>rec</sub> 150 (-44.9) Cr' 118 (-4.8) Cr                          |
| <b>Tp<sup>6</sup>Tt<sub>2</sub>Tp<sup>6</sup></b>                    | Col <sub>rec</sub> 136 (-) Col <sub>hex</sub> ' 281 (9.1) N <sub>Col</sub> 309 (0.7) I                                              | I 308 (-0.8) N <sub>Col</sub> 279 (-8.4) Col <sub>hex</sub> ' 125 (-) Col <sub>rec</sub>                            |
| <b>Tp<sup>6</sup>PhTp<sup>6</sup></b>                                | Cr 69 (13.5) Col <sub>rec</sub> 164 (7.7) N <sub>Col</sub> 186 (1.1) I                                                              | I 185 (-1.7) N <sub>Col</sub> 157 (-7.0) Col <sub>rec</sub> 47 (-15.3) Cr                                           |
| <b>Tp<sup>6</sup>Ph<sub>2</sub>Tp<sup>6</sup></b>                    | Col <sub>rec</sub> 134 (-6.3) Cr 161 (6.2) Cr' 167 (10.6) Col <sub>hex</sub> ' 200 (-) N <sub>Col</sub> 202 (0.9) <sup>†</sup> I    | I 202 (-0.8) N <sub>Col</sub> 200 (-) Col <sub>hex</sub> ' 151 (-10.3) Col <sub>rec</sub> 88 (-) Col <sub>rec</sub> |
| <b>Tp<sup>6</sup>TtTp<sup>6</sup></b>                                | Cr 80 (-) Cr' 151 (-) Cr'' 155 (57.3) Col <sub>rec</sub> 219 (8.8) N <sub>Col</sub> 268 (0.4) I                                     | I 267 (-0.7) N <sub>Col</sub> 212 (-8.2) Col <sub>rec</sub> 53 (-21.5) Cr                                           |
| <b>Tp<sup>6</sup>BtTp<sup>6</sup></b>                                | Cr 163 (44.2) Col <sub>rec</sub> 232 (17.4) N <sub>Col</sub> 296 (0.7) I                                                            | I 290 (-1.2) N <sub>Col</sub> 203 (-4.9) Col <sub>rec</sub> 90 (-23.2) Cr                                           |
| <b>Tp<sup>8</sup>Th<sub>2</sub>Tp<sup>8</sup></b>                    | Cr 95 (12.1) Cr' 98 (9.0) Cr'' 109 (77.9) Col <sub>rec</sub> 180 (9.4) N <sub>Col</sub> 204 (0.9) I                                 | I 204 (-1.0) N <sub>Col</sub> 176 (-8.9) Col <sub>rec</sub> 43 (-37.4) Cr                                           |
| <b>Tp<sup>8</sup>PhTp<sup>8</sup></b>                                | Cr 48 (-) Cr' 100 (81.8) Col <sub>rec</sub> 132 (-) Col <sub>rec</sub> ' 136 (2.3) N <sub>Col</sub> 144 (7.2) I                     | I 144 (-8.6) N <sub>Col</sub> 133 (-2.2) Col <sub>rec</sub> ' 114 (-) Col <sub>rec</sub> 41                         |



| I                                                                                                             | (-25.5) Cr                                                                 |
|---------------------------------------------------------------------------------------------------------------|----------------------------------------------------------------------------|
| $\text{Tp}^8\text{P90h}_2\text{Tp}^8$ Col <sub>rec</sub> 165 (19.2) N <sub>Col</sub> 172 (0.4) I              | I 171 (-0.5) N <sub>Col</sub> 154 (-18.2) Col <sub>rec</sub>               |
| $\text{Tp}^8\text{TtTp}^8$ Cr 143 (64.7) Col <sub>rec</sub> 185 (8.6) N <sub>Col</sub> 200 (0.5) I            | I 199 (-0.8) N <sub>Col</sub> 180 (-8.6) Col <sub>rec</sub> 69 (-60.9) Cr  |
| $\text{Tp}^8\text{BtTp}^8$ Cr 136 (66.3) Col <sub>rec</sub> 223 (15.9) N <sub>Col</sub> 248 (0.6) I           | I 247 (-0.8) N <sub>Col</sub> 220 (-16.2) Col <sub>rec</sub> 78 (-58.1) Cr |
| $\text{Tp}^6\text{Ph}_2\text{Tp}^{12}$ Col <sub>rec</sub> 118 (2.6) N <sub>Col</sub> 125 (8.4) I              | I 114 (-) N <sub>Col</sub> 113 (-7.4) <sup>†</sup> Col <sub>rec</sub>      |
| $\text{Tp}^{12}\text{Ph}_2\text{Tp}^{12}$ Cr 0 (71.7) Col <sub>rec</sub> 136 (15.7) I                         | I 125 (-15.0) Col <sub>rec</sub> -3 (-76.9) Cr                             |
| $\text{Tp}^6\text{Th}_2\text{Tp}^{12}$ Cr 88 (48.2) Col <sub>rec</sub> 125 (1.8) N <sub>Col</sub> 167 (0.4) I | I 166 (-0.9) N <sub>Col</sub> 119 (-1.4) Col <sub>rec</sub> 28 (-37.1) Cr  |
| $\text{Tp}^{12}\text{Th}_2\text{Tp}^{12}$ Cr 90 (71.7) Col <sub>rec</sub> 132 (2.8) I                         | I 121 (-3.2) Col <sub>rec</sub> 51 (-77.7) Cr                              |
| $\text{Tp}^6\text{Tp}^6$ Cr 152 (45.1) I                                                                      | I 137 (-39.4) Cr                                                           |

Cr, Cr', Cr'': crystalline phases; Col<sub>hex</sub>, Col'<sub>hex</sub> hexagonal columnar phases; Col<sub>rec</sub> and Col'<sub>rec</sub>: (multi)columnar rectangular mesophases (see main text and Table 3 for details); N<sub>Col</sub>: nematic columnar phase; I: isotropic liquid. <sup>†</sup>Cumulated enthalpy.

## 11. SWAXS patterns and indexation tables

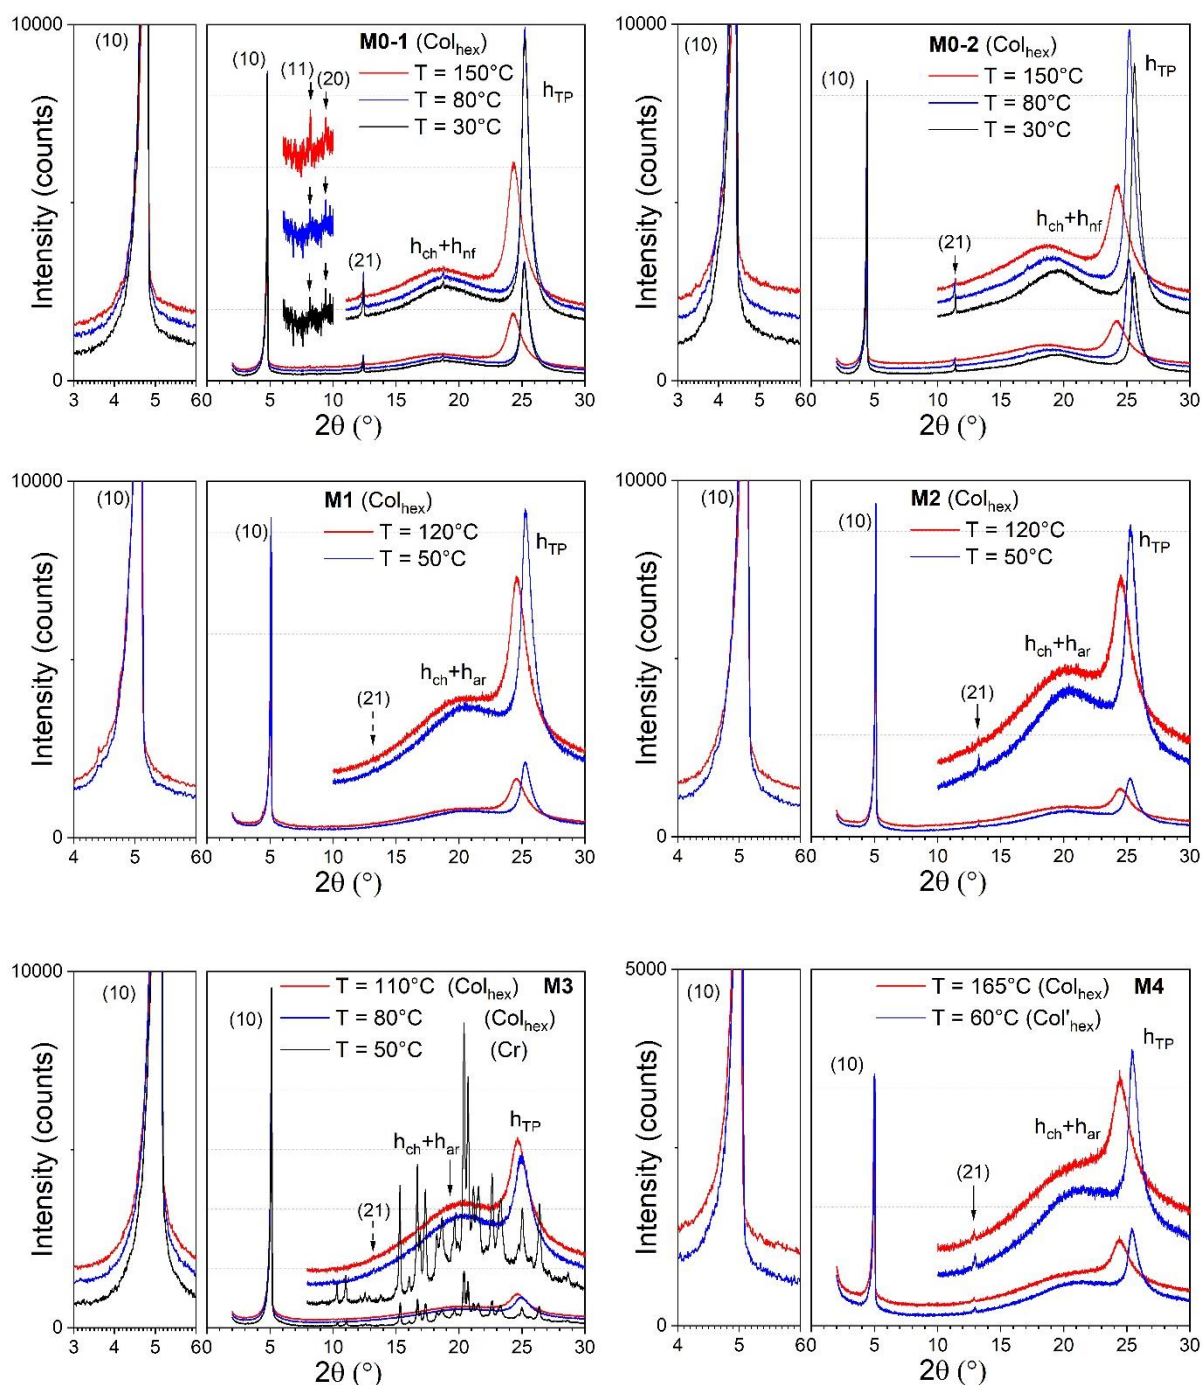

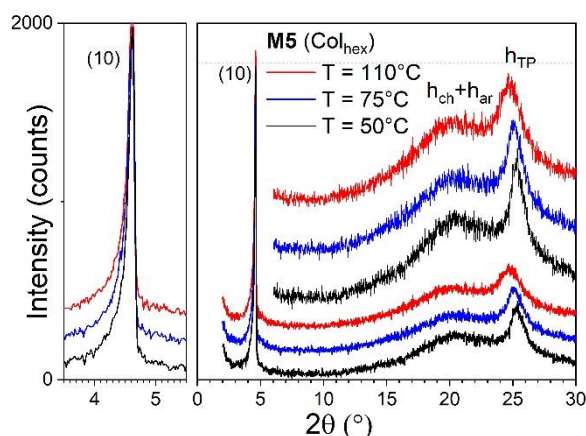

**Figure S67.** SWAXS patterns of monomeric precursors, **M0-M5**

**Table S9.** Table of indexation of mesophases of monomeric species **M0-M5**.

| $2\theta_{\text{exp}}$                                                    | $d_{\text{exp.}}$ | $I$ [%] | $hk$                          | Line shape ( $\xi$ ) | $d_{\text{calc.}}$ | $\Delta$ |
|---------------------------------------------------------------------------|-------------------|---------|-------------------------------|----------------------|--------------------|----------|
| <b>M0-1 (T = 150°C): Col<sub>hex</sub>-p6mm; a<sub>hex</sub> = 21.75Å</b> |                   |         |                               |                      |                    |          |
| 4.68(6)                                                                   | 18.84             | VS      | 10                            | sh                   | 18.84              | 0.00     |
| 8.15(0)                                                                   | 10.83             | W       | 11                            | sh                   | 10.87              | 0.04     |
| 9.37(2)                                                                   | 9.43              | W       | 20                            | sh                   | 9.42               | 0.01     |
| 12.39(1)                                                                  | 7.14              | M       | 21                            | sh                   | 7.12               | 0.02     |
| 18.69                                                                     | 4.74              | VS      | $h_{\text{ch}}$               | br                   | -                  | -        |
| 24.34                                                                     | 3.65              | VS      | $h_{\text{TP}}$               | sh (46)              | -                  | -        |
| <b>M0-1 (T = 80°C): Col<sub>hex</sub>-p6mm; a<sub>hex</sub> = 21.71Å</b>  |                   |         |                               |                      |                    |          |
| 4.69(6)                                                                   | 18.80             | VS      | 10                            | sh                   | 18.80              | 0.00     |
| 8.14(2)                                                                   | 10.85             | W       | 11                            | sh                   | 10.85              | 0.00     |
| 9.42(0)                                                                   | 9.38              | W       | 20                            | sh                   | 9.40               | 0.02     |
| 12.42(1)                                                                  | 7.12              | M       | 21                            | sh                   | 7.11               | 0.01     |
| 18.71                                                                     | 4.74              | VS      | $h_{\text{ch}}$               | br                   | -                  | -        |
| 25.24                                                                     | 3.53              | VS      | $h_{\text{TP}}$               | sh (99)              | -                  | -        |
| <b>M0-1 (T = 30°C): Col<sub>hex</sub>-p6mm; a<sub>hex</sub> = 21.68Å</b>  |                   |         |                               |                      |                    |          |
| 4.70(1)                                                                   | 18.78             | VS      | 10                            | sh                   | 18.78              | 0.00     |
| 8.14(9)                                                                   | 10.84             | W       | 11                            | sh                   | 10.84              | 0.00     |
| 9.40(0)                                                                   | 9.40              | W       | 20                            | sh                   | 9.39               | 0.01     |
| 12.47(4)                                                                  | 7.09              | M       | 21                            | sh                   | 7.10               | 0.01     |
| 18.82                                                                     | 4.71              | VS      | $h_{\text{ch}}$               | br                   | -                  | -        |
| 25.24                                                                     | 3.53              | VS      | $h_{\text{TP}}$               | sh (99)              | -                  | -        |
| <b>M0-2 (T = 150°C): Col<sub>hex</sub>-p6mm; a<sub>hex</sub> = 23.55Å</b> |                   |         |                               |                      |                    |          |
| 4.32(5)                                                                   | 20.41             | VS      | 10                            | sh                   | 20.40              | 0.00     |
| 11.46(7)                                                                  | 7.71              | M       | 21                            | sh                   | 7.71               | 0.00     |
| 18.84                                                                     | 4.70              | VS      | $h_{\text{ch}}$               | br                   | -                  | -        |
| 24.19                                                                     | 3.67              | VS      | $h_{\text{TP}}$               | sh (35)              | -                  | -        |
| <b>M0-2 (T = 80°C): Col<sub>hex</sub>-p6mm; a<sub>hex</sub> = 23.68Å</b>  |                   |         |                               |                      |                    |          |
| 4.30(5)                                                                   | 20.51             | VS      | 10                            | sh                   | 20.51              | 0.00     |
| 11.40(7)                                                                  | 7.75              | M       | 21                            | sh                   | 7.75               | 0.00     |
| 18.76                                                                     | 4.72              | VS      | $h_{\text{ch}}$               | br                   | -                  | -        |
| 25.20                                                                     | 3.53              | VS      | $h_{\text{TP}}$               | sh (88)              | -                  | -        |
| <b>M0-2 (T = 30°C): Col<sub>hex</sub>-p6mm; a<sub>hex</sub> = 23.60Å</b>  |                   |         |                               |                      |                    |          |
| 4.32(1)                                                                   | 20.43             | VS      | 10                            | sh                   | 20.44              | 0.00     |
| 11.44(3)                                                                  | 7.73              | M       | 21                            | sh                   | 7.72               | 0.01     |
| 19.75                                                                     | 4.49              | VS      | $h_{\text{ch}}$               | br                   | -                  | -        |
| 25.63                                                                     | 3.47              | VS      | $h_{\text{TP}}$               | sh (101)             | -                  | -        |
| <b>M1 (T = 120°C): Col<sub>hex</sub>-p6mm; a<sub>hex</sub> = 20.46Å</b>   |                   |         |                               |                      |                    |          |
| 4.98(3)                                                                   | 17.72             | VS      | 10                            | sh                   | 17.72              | 0.00     |
| 13.20(3)                                                                  | 6.70              | VW      | 21                            | sh                   | 6.70               | 0.00     |
| 19.76                                                                     | 4.49              | VS      | $h_{\text{ch}}+h_{\text{ar}}$ | br                   | -                  | -        |
| 24.57                                                                     | 3.62              | VS      | $h_{\text{TP}}$               | sh (36)              | -                  | -        |
| <b>M1 (T = 50°C): Col<sub>hex</sub>-p6mm; a<sub>hex</sub> = 20.44Å</b>    |                   |         |                               |                      |                    |          |
| 4.98(3)                                                                   | 17.71             | VS      | 10                            | sh                   | 17.70              | 0.00     |
| 13.21(1)                                                                  | 6.69              | VW      | 21                            | sh                   | 6.69               | 0.00     |
| 20.48                                                                     | 4.33              | VS      | $h_{\text{ch}}+h_{\text{ar}}$ | br                   | -                  | -        |
| 25.31                                                                     | 3.52              | VS      | $h_{\text{TP}}$               | sh (64)              | -                  | -        |
| <b>M2 (T = 120°C): Col<sub>hex</sub>-p6mm; a<sub>hex</sub> = 20.40Å</b>   |                   |         |                               |                      |                    |          |

|                                                                         |       |    |                 |         |       |      |
|-------------------------------------------------------------------------|-------|----|-----------------|---------|-------|------|
| 4.99(7)                                                                 | 17.67 | VS | 10              | sh      | 17.67 | 0.00 |
| 13.24(8)                                                                | 6.68  | M  | 21              | sh      | 6.68  | 0.00 |
| 19.96                                                                   | 4.44  | VS | $h_{ch}+h_{ar}$ | br      | -     | -    |
| 24.46                                                                   | 3.64  | VS | $h_{TP}$        | sh (30) | -     | -    |
| <b>M2 (T = 50°C): Col<sub>hex</sub>-p6mm; a<sub>hex</sub> = 20.38Å</b>  |       |    |                 |         |       |      |
| 5.00(2)                                                                 | 17.65 | VS | 10              | sh      | 17.65 | 0.00 |
| 13.26(0)                                                                | 6.67  | M  | 21              | sh      | 6.67  | 0.00 |
| 20.31                                                                   | 4.39  | VS | $h_{ch}+h_{ar}$ | br      | -     | -    |
| 25.29                                                                   | 3.52  | VS | $h_{TP}$        | sh (58) | -     | -    |
| <b>M3 (T = 110°C): Col<sub>hex</sub>-p6mm; a<sub>hex</sub> = 20.44Å</b> |       |    |                 |         |       |      |
| 5.98(8)                                                                 | 17.70 | VS | 10              | sh      | 17.70 | 0.00 |
| 13.21(3)                                                                | 6.69  | VW | 21              | sh      | 6.69  | 0.00 |
| 20.45                                                                   | 4.33  | VS | $h_{ch}+h_{ar}$ | br      | -     | -    |
| 24.59                                                                   | 3.62  | VS | $h_{TP}$        | sh (27) | -     | -    |
| <b>M3 (T = 80°C): Col<sub>hex</sub>-p6mm; a<sub>hex</sub> = 20.35Å</b>  |       |    |                 |         |       |      |
| 5.01(1)                                                                 | 17.62 | VS | 10              | sh      | 17.62 | 0.00 |
| 13.27(4)                                                                | 6.66  | VW | 21              | sh      | 6.66  | 0.00 |
| 19.74                                                                   | 4.49  | VS | $h_{ch}+h_{ar}$ | br      | -     | -    |
| 24.89                                                                   | 3.57  | VS | $h_{TP}$        | sh (31) | -     | -    |
| <b>M4 (T = 165°C): Col<sub>hex</sub>-p6mm; a<sub>hex</sub> = 20.96Å</b> |       |    |                 |         |       |      |
| 4.86(5)                                                                 | 18.15 | VS | 10              | sh      | 18.15 | 0.00 |
| 12.90(1)                                                                | 6.86  | M  | 21              | sh      | 6.86  | 0.00 |
| 19.85                                                                   | 4.47  | VS | $h_{ch}+h_{ar}$ | br      | -     | -    |
| 24.41                                                                   | 3.64  | VS | $h_{TP}$        | sh (30) | -     | -    |
| <b>M4 (T = 60°C): Col'<sub>hex</sub>-p6mm; a<sub>hex</sub> = 20.86Å</b> |       |    |                 |         |       |      |
| 4.88(6)                                                                 | 18.07 | VS | 10              | sh      | 18.07 | 0.00 |
| 12.94(1)                                                                | 6.83  | M  | 21              | sh      | 6.93  | 0.00 |
| 20.60                                                                   | 4.31  | VS | $h_{ch}+h_{ar}$ | br      | -     | -    |
| 25.47                                                                   | 3.49  | VS | $h_{TP}$        | sh (69) | -     | -    |
| <b>M5 (T = 110°C): Col<sub>hex</sub>-p6mm; a<sub>hex</sub> = 22.18Å</b> |       |    |                 |         |       |      |
| 4.59(5)                                                                 | 19.21 | VS | 10              | sh      | -     | -    |
| 20.00                                                                   | 4.44  | VS | $h_{ch}+h_{ar}$ | br      | -     | -    |
| 24.66                                                                   | 3.60  | VS | $h_{TP}$        | sh (25) | -     | -    |
| <b>M5 (T = 75°C): Col<sub>hex</sub>-p6mm; a<sub>hex</sub> = 22.20Å</b>  |       |    |                 |         |       |      |
| 4.59(2)                                                                 | 19.23 | VS | 10              | sh      | -     | -    |
| 20.25                                                                   | 4.38  | VS | $h_{ch}+h_{ar}$ | br      | -     | -    |
| 25.09                                                                   | 3.55  | VS | $h_{TP}$        | sh (45) | -     | -    |
| <b>M5 (T = 50°C): Col<sub>hex</sub>-p6mm; a<sub>hex</sub> = 22.22Å</b>  |       |    |                 |         |       |      |
| 4.58(8)                                                                 | 19.24 | VS | 10              | sh      | -     | -    |
| 20.25                                                                   | 4.38  | VS | $h_{ch}+h_{ar}$ | br      | -     | -    |
| 25.31                                                                   | 3.51  | VS | $h_{TP}$        | sh (46) | -     | -    |

$2\theta_{exp}$  (°),  $d_{exp}$  (Å),  $d_{calc}$  (Å): experimental and calculated angles and d-spacings from peak position of maximum;  $|\Delta| = |d_{exp} - d_{calc}|$ ; I: intensity of reflection, signal intensity code: VS = very strong, S = strong, M = medium, W = weak, VW = very weak; (hk) are the Miller indices of reflections from the columnar lattice; Line shape of reflections: sh stands for sharp and br for broad,  $\xi$  (Å): correlation length from peak width using the Debye-Scherrer equation with shape factor K = 0.9 (no indication: long-range periodicity from sharp reflection);  $h_{ch}$  (Å): liquid-like lateral distances between molten chains;  $h_{ar}$  (Å): liquid-like distance between grafted aromatic parts;  $h_{TP}$  (Å): average piling distance along triphenylene columns;  $a_{hex}$ : hexagonal lattice parameter.

**Table S10.** Structural and geometrical parameters of the monomers mesophases at various temperatures.

| Cpds        | T <sup>a</sup> | Phase <sup>b</sup>        | V <sub>mol</sub> <sup>c</sup> | $\rho^c$ | $a_{hex}^d$ | A <sup>d</sup> | $h_{mol}^e$ | $h_{TP}$ (ξ) <sup>f</sup> | $\psi^g$ | D <sub>TP</sub> <sup>h</sup> | S <sub>ch</sub> <sup>i</sup> | q <sup>j</sup> |
|-------------|----------------|---------------------------|-------------------------------|----------|-------------|----------------|-------------|---------------------------|----------|------------------------------|------------------------------|----------------|
| <b>M0-1</b> | 150            | Col <sub>hex</sub> -p6mm  | 1609                          | 1.061    | 21.75       | 409.68         | 3.92        | 3.65 (46)                 | 21       | 11.58                        | 23.76                        | 0.94           |
|             | 80             | Col <sub>hex</sub> -p6mm  | 1490                          | 1.129    | 21.71       | 408.18         | 3.65        | 3.53 (99)                 | 15       | 11.80                        | 22.54                        | 0.94           |
|             | 30             | Col <sub>hex</sub> -p6mm  | 1436                          | 1.188    | 21.68       | 407.05         | 3.53        | 3.53 (99)                 | 0        | 11.80                        | 21.82                        | 0.94           |
| <b>M0-2</b> | 150            | Col <sub>hex</sub> -p6mm  | 1903                          | 1.019    | 23.55       | 480.30         | 3.96        | 3.67 (35)                 | 22       | 11.52                        | 23.92                        | 0.95           |
|             | 80             | Col <sub>hex</sub> -p6mm  | 1771                          | 1.081    | 23.68       | 485.62         | 3.65        | 3.53 (88)                 | 16       | 11.80                        | 22.55                        | 0.94           |
|             | 30             | Col <sub>hex</sub> -p6mm  | 1684                          | 1.136    | 23.60       | 482.34         | 3.49        | 3.47 (101)                | 6        | 11.87                        | 21.69                        | 0.94           |
| <b>M1</b>   | 120            | Col <sub>hex</sub> -p6mm  | 1442                          | 0.934    | 20.46       | 362.53         | 3.98        | 3.62 (36)                 | 24       | 11.26                        | 23.46                        | 1.03           |
|             | 50             | Col <sub>hex</sub> -p6mm  | 1394                          | 0.966    | 20.44       | 361.82         | 3.85        | 3.52 (64)                 | 24       | 11.28                        | 22.75                        | 1.05           |
| <b>M2</b>   | 120            | Col <sub>hex</sub> -p6mm  | 1442                          | 0.934    | 20.40       | 360.40         | 4.00        | 3.64 (30)                 | 24       | 11.23                        | 23.51                        | 1.03           |
|             | 50             | Col <sub>hex</sub> -p6mm  | 1394                          | 0.966    | 20.38       | 359.70         | 3.88        | 3.52 (58)                 | 25       | 11.25                        | 22.84                        | 1.05           |
| <b>M3</b>   | 110            | Col <sub>hex</sub> -p6mm  | 1420                          | 0.930    | 20.44       | 361.82         | 3.92        | 3.62 (27)                 | 22       | 11.31                        | 23.22                        | 1.02           |
|             | 80             | Col <sub>hex</sub> -p6mm  | 1383                          | 0.954    | 20.35       | 358.64         | 3.86        | 3.57 (31)                 | 22       | 11.35                        | 22.91                        | 1.03           |
| <b>M4</b>   | 165            | Col' <sub>hex</sub> -p6mm | 1558                          | 0.925    | 20.96       | 380.46         | 4.09        | 3.64 (30)                 | 27       | 11.19                        | 24.00                        | 1.02           |
|             | 60             | Col <sub>hex</sub> -p6mm  | 1413                          | 1.019    | 20.86       | 376.84         | 3.75        | 3.49 (69)                 | 21       | 11.60                        | 22.76                        | 1.04           |
| <b>M5</b>   | 110            | Col <sub>hex</sub> -p6mm  | 1728                          | 0.914    | 22.18       | 426.11         | 4.06        | 3.60 (25)                 | 27       | 11.13                        | 23.65                        | 1.04           |

|    |                          |      |       |       |        |      |           |    |       |       |      |
|----|--------------------------|------|-------|-------|--------|------|-----------|----|-------|-------|------|
| 75 | Col <sub>hex</sub> -p6mm | 1667 | 0.947 | 22.20 | 427.00 | 3.90 | 3.55 (45) | 25 | 11.26 | 23.03 | 1.04 |
| 50 | Col <sub>hex</sub> -p6mm | 1635 | 0.966 | 22.22 | 427.44 | 3.82 | 3.51 (46) | 23 | 11.33 | 22.69 | 1.04 |

<sup>a</sup>Temperature of experiment (°C); <sup>b</sup>Mesophase type and symmetry; <sup>c</sup>Molecular volume (Å<sup>3</sup>) and density (g.cm<sup>-3</sup>) calculated by additivity of partial elementary volumes; <sup>d</sup>Hexagonal lattice parameter  $a_{\text{hex}}$  (Å) and cross-section areas  $A$  (Å<sup>2</sup>) of the Col<sub>hex</sub>:  $A = a_{\text{hex}}^2 \sin \gamma$ , where  $\gamma = 120^\circ$  (number of TP columns per lattice,  $Z = 1$ ); <sup>e</sup>Columnar slice thickness:  $h_{\text{mol}} = V_{\text{mol}} / (A/Z)$  in Å; <sup>f</sup>Face-to-face  $\pi$ - $\pi$  stacking distance,  $h_{\text{TP}}$ , (Å) from scattering maximum from SWAXS pattern, and  $\zeta$ , correlation length (Å) determined by the Debye-Scherrer formula; <sup>g</sup>Out-of-plane tilt angle  $\psi$  (°) of TP-based mesogen cores inside columns:  $\psi = \arcsin(h_{\text{TP}}/h_{\text{mol}})$ . <sup>h</sup>Diameter of triphenylene core,  $D_{\text{TP}} = (\chi_{\text{TP}} 4A / \pi)^{1/2}$ , where  $\chi_{\text{TP}}$  is the volume fraction of triphenylene core ( $V_{\text{TP}}/V_{\text{mol}}$ ); <sup>i</sup> $\langle S_{\text{ch}} \rangle$  is the average cross-section chain area:  $\langle S_{\text{ch}} \rangle = \pi D_{\text{TP}} \times h_{\text{mol}} / 6$ ; <sup>j</sup>Chain packing ratio:  $\langle q \rangle = \langle S_{\text{ch}} \rangle / \sigma_{\text{ch}}$ ,  $\sigma_{\text{ch}}$  being the available cross-sectional area for a molten chain. For **M0-1** and **M0-2**,  $\langle q \rangle = (\pi D_{\text{TP}} \times h_{\text{mol}}) / (5\sigma_{\text{ch}} + 1\sigma_{\text{cf}})$ , where  $\sigma_{\text{cf}}$  being the available cross-sectional area for a molten fluorinated chain.<sup>1</sup>

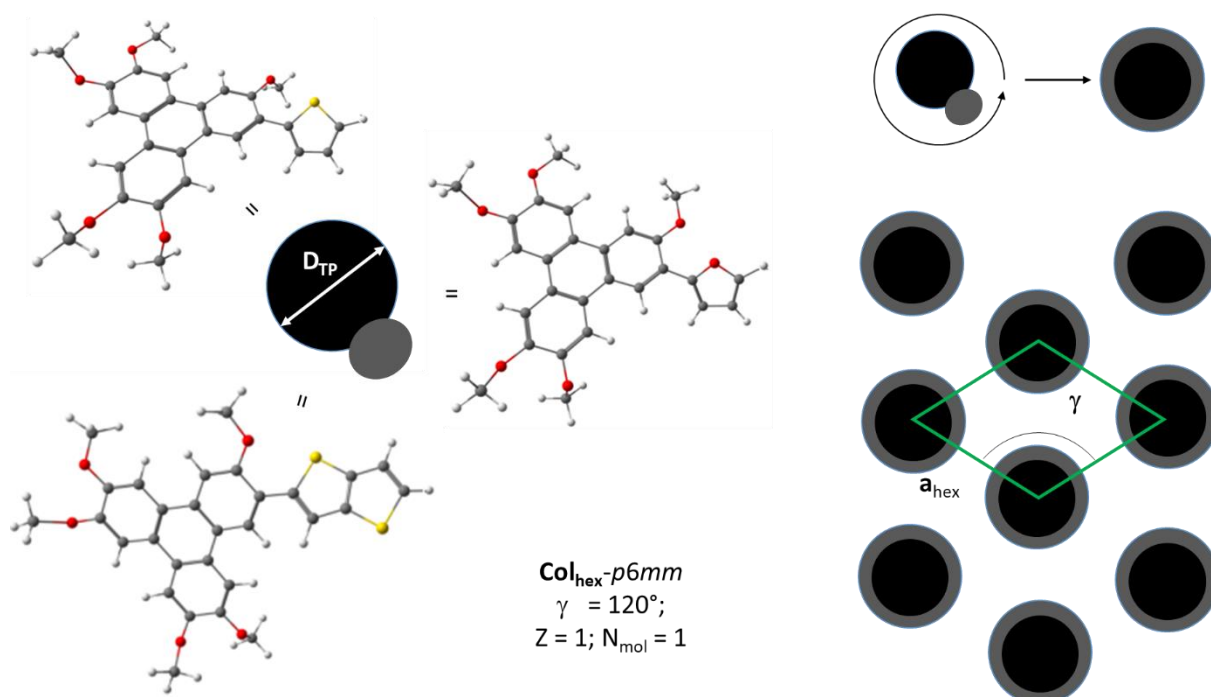

**Figure S68.** Schematic representations of the molecular self-assemblies and supramolecular organizations in the hexagonal mesophase of **M1**, **M3** and **M4**;  $a_{\text{hex}}$ ,  $\gamma$ : lattice parameter and angle,  $Z$ : number of columns per lattice and  $N_{\text{mol}}$ : number of mesogens per lattice (the chains are not represented for clarity).  $D_{\text{TP}}$  defined above.

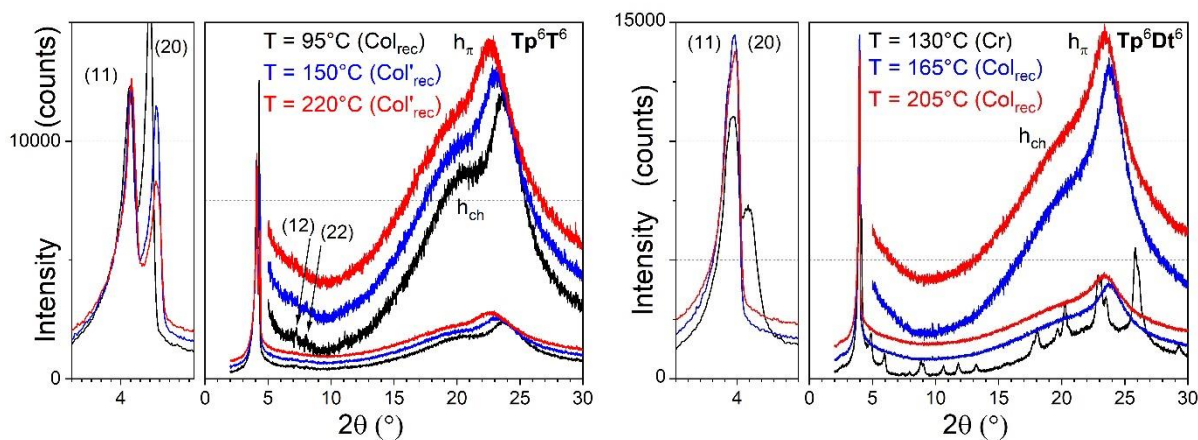

**Figure S69.** SWAXS patterns of the unsymmetrical dimers, **Tp<sup>6</sup>T<sup>6</sup>** - **Tp<sup>6</sup>Dt<sup>6</sup>**

<sup>1</sup> B. Alameddine, O. F. Aebischer, B. Heinrich, D. Guillon, B. Donnio, T. A. Jenny, *Supramol. Chem.* **2014**, *26*, 125-137.

**Table S11.** Table of indexation of mesophases of the unsymmetrical dimers  $\text{Tp}^6\text{T}^6$  -  $\text{Tp}^6\text{Dt}^6$ .

| $2\theta_{\text{exp}}$                                                                                                                                                                                                                                                                                | $d_{\text{exp}}$ | $l$ [%] | Line shape ( $\xi$ ) | $hk$            | $d_{\text{calc}}$ | $\Delta$ |
|-------------------------------------------------------------------------------------------------------------------------------------------------------------------------------------------------------------------------------------------------------------------------------------------------------|------------------|---------|----------------------|-----------------|-------------------|----------|
| <b><math>\text{Tp}^6\text{T}^6</math> (T = 220°C): <math>\text{Col}'_{\text{rec}}\text{-c}2mm</math>; <math>a_{\text{rec}} = 40.66\text{\AA}</math>; <math>b_{\text{rec}} = 25.64\text{\AA}</math> / <math>a_{\text{rec}} = 43.38\text{\AA}</math>; <math>b_{\text{rec}} = 23.01\text{\AA}</math></b> |                  |         |                      |                 |                   |          |
| 4.06(9)                                                                                                                                                                                                                                                                                               | 21.69            | VS      | sh                   | 11/20           | -                 | -        |
| 4.34(2)                                                                                                                                                                                                                                                                                               | 20.33            | VS      | sh                   | 20/11           | -                 | -        |
| 17.84                                                                                                                                                                                                                                                                                                 | 4.97             | VS      | br                   | $h_{\text{ch}}$ | -                 | -        |
| 22.69                                                                                                                                                                                                                                                                                                 | 3.92             | VS      | sh (10)              | $h_{\text{TP}}$ | -                 | -        |
| <b><math>\text{Tp}^6\text{T}^6</math> (T = 150°C): <math>\text{Col}'_{\text{rec}}\text{-c}2mm</math>; <math>a_{\text{rec}} = 40.72\text{\AA}</math>; <math>b_{\text{rec}} = 25.73\text{\AA}</math> / <math>a_{\text{rec}} = 43.50\text{\AA}</math>; <math>b_{\text{rec}} = 23.04\text{\AA}</math></b> |                  |         |                      |                 |                   |          |
| 4.05(9)                                                                                                                                                                                                                                                                                               | 21.75            | VS      | sh                   | 11/20           | -                 | -        |
| 4.33(7)                                                                                                                                                                                                                                                                                               | 20.36            | VS      | sh                   | 20/11           | -                 | -        |
| 18.49                                                                                                                                                                                                                                                                                                 | 4.79             | VS      | br                   | $h_{\text{ch}}$ | -                 | -        |
| 23.17                                                                                                                                                                                                                                                                                                 | 3.84             | VS      | sh (11)              | $h_{\text{TP}}$ | -                 | -        |
| <b><math>\text{Tp}^6\text{T}^6</math> (T = 95°C): <math>\text{Col}_{\text{rec}}\text{-p}2gg</math>; <math>a_{\text{rec}} = 41.10\text{\AA}</math>; <math>b_{\text{rec}} = 25.62\text{\AA}</math></b>                                                                                                  |                  |         |                      |                 |                   |          |
| 4.06(1)                                                                                                                                                                                                                                                                                               | 21.74            | VS      | sh                   | 11              | -                 | -        |
| 4.29(5)                                                                                                                                                                                                                                                                                               | 20.55            | VS      | sh                   | 20              | -                 | -        |
| 7.21(3)                                                                                                                                                                                                                                                                                               | 12.24            | VW      | sh                   | 12              | 12.23             | 0.01     |
| 8.13(3)                                                                                                                                                                                                                                                                                               | 10.86            | VW      | sh                   | 22              | 10.87             | 0.01     |
| 19.44                                                                                                                                                                                                                                                                                                 | 4.56             | VS      | br                   | $h_{\text{ch}}$ | -                 | -        |
| 23.89                                                                                                                                                                                                                                                                                                 | 3.72             | VS      | sh (15)              | $h_{\text{TP}}$ | -                 | -        |
| <b><math>\text{Tp}^6\text{Dt}^6</math> (T = 205°C): <math>\text{Col}_{\text{rec}}\text{-c}2mm</math>; <math>a_{\text{rec}} = 44.32\text{\AA}</math>; <math>b_{\text{rec}} = 25.79\text{\AA}</math> / <math>a_{\text{rec}} = 44.58\text{\AA}</math>; <math>b_{\text{rec}} = 25.54\text{\AA}</math></b> |                  |         |                      |                 |                   |          |
| 3.96(0)                                                                                                                                                                                                                                                                                               | 22.29            | VS      | sh                   | 11/20           | -                 | -        |
| 3.99(0)                                                                                                                                                                                                                                                                                               | 22.16            | VS      | sh                   | 20/11           | -                 | -        |
| 18.48                                                                                                                                                                                                                                                                                                 | 4.79             | S       | br                   | $h_{\text{ch}}$ | -                 | -        |
| 23.36                                                                                                                                                                                                                                                                                                 | 3.80             | S       | sh (12)              | $h_{\text{TP}}$ | -                 | -        |
| <b><math>\text{Tp}^6\text{Dt}^6</math> (T = 165°C): <math>\text{Col}_{\text{rec}}\text{-c}2mm</math>; <math>a_{\text{rec}} = 44.30\text{\AA}</math>; <math>b_{\text{rec}} = 25.98\text{\AA}</math> / <math>a_{\text{rec}} = 44.82\text{\AA}</math>; <math>b_{\text{rec}} = 25.48\text{\AA}</math></b> |                  |         |                      |                 |                   |          |
| 3.93(9)                                                                                                                                                                                                                                                                                               | 22.41            | VS      | sh                   | 11/20           | -                 | -        |
| 3.98(5)                                                                                                                                                                                                                                                                                               | 22.15            | VS      | sh                   | 20/11           | -                 | -        |
| 19.18                                                                                                                                                                                                                                                                                                 | 4.62             | VS      | br                   | $h_{\text{ch}}$ | -                 | -        |
| 23.77                                                                                                                                                                                                                                                                                                 | 3.74             | VS      | sh (14)              | $h_{\text{TP}}$ | -                 | -        |

As **Table S9** above. Rectangular lattice parameters:  $a_{\text{rec}}$  and  $b_{\text{rec}}$ .

**Table S12.** Structural and geometrical parameters of the mesophases of  $\text{Tp}^6\text{T}^6$  and  $\text{Tp}^6\text{Dt}^6$  at various temperatures.

| Cpds                     | $T^a$                                 | Phase <sup>b</sup>                     | $V_{\text{mol}}^c$ | $\rho^c$ | $a_{\text{rec}}^d$ | $b_{\text{rec}}^d$ | $a_{\text{rec}}/b_{\text{rec}}$ | $A^d$   | $\gamma, Z^d$ | $h_{\text{mol}}^e$ | $h_{\text{TP}} (\xi)^f$ | $\psi^g$ |
|--------------------------|---------------------------------------|----------------------------------------|--------------------|----------|--------------------|--------------------|---------------------------------|---------|---------------|--------------------|-------------------------|----------|
| $\text{Tp}^6\text{T}^6$  | 220                                   | $\text{Col}'_{\text{rec}}\text{-c}2mm$ | 2667               | 0.848    | 40.66              | 25.64              | 1.58                            | 1042.52 | 90, 2         | 5.11               | 3.92 (10)               | 40       |
|                          | -                                     | -                                      | -                  | -        | 43.38              | 23.01              | 1.88                            | 998.17  | -, -          | 5.34               | -                       | 43       |
|                          | 150                                   | $\text{Col}'_{\text{rec}}\text{-c}2mm$ | 2489               | 0.909    | 40.72              | 25.73              | 1.58                            | 1047.72 | 90, 2         | 4.75               | 3.84 (11)               | 36       |
|                          | -                                     | -                                      | -                  | -        | 43.50              | 23.04              | 1.89                            | 1002.24 | -, -          | 4.97               | -                       | 41       |
| 95                       | $\text{Col}_{\text{rec}}\text{-p}2gg$ | 2367                                   | 0.955              | 41.10    | 25.62              | 1.60               | 1052.99                         | 90, 2   | 4.49          | 3.72 (15)          | 34                      |          |
| $\text{Tp}^6\text{Dt}^6$ | 205                                   | $\text{Col}_{\text{rec}}\text{-c}2mm$  | 2646               | 0.899    | 44.32              | 25.79              | 1.72                            | 1143.01 | 90, 2         | 4.63               | 3.80 (12)               | 35       |
|                          | -                                     | -                                      | -                  | -        | 44.58              | 25.54              | 1.74                            | 1138.57 | -, -          | 4.65               | -                       | 35       |
|                          | 165                                   | $\text{Col}_{\text{rec}}\text{-c}2mm$  | 2548               | 0.906    | 44.30              | 25.98              | 1.70                            | 1150.9  | 90, 2         | 4.43               | 3.74 (14)               | 32       |
| -                        | -                                     | -                                      | -                  | 44.82    | 25.48              | 1.76               | 1142.01                         | -, -    | 4.46          | -                  | 33                      |          |

<sup>a,b,c,e,f,g</sup> As in **Tables S10** <sup>d</sup>Lattice parameters  $a_{\text{rec}}$ ,  $b_{\text{rec}}$  and  $\gamma$  ( $^\circ$ ), number of TP columns per lattice ( $Z$ ) and cross-section areas  $A$  ( $\text{\AA}^2$ ) of the  $\text{Col}_{\text{rec}}$ :  $A = a \times b \sin \gamma$ . The two possible rectangular lattices, when applicable, are considered.

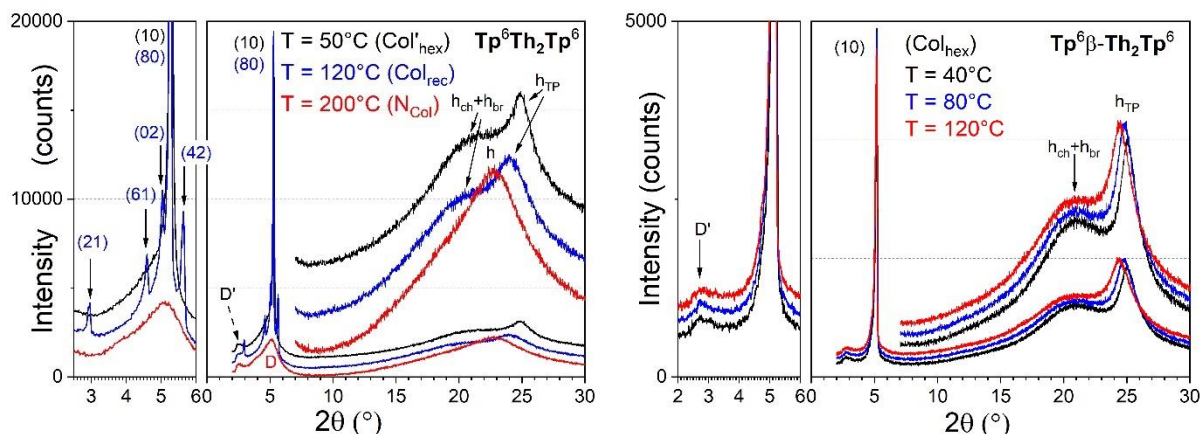

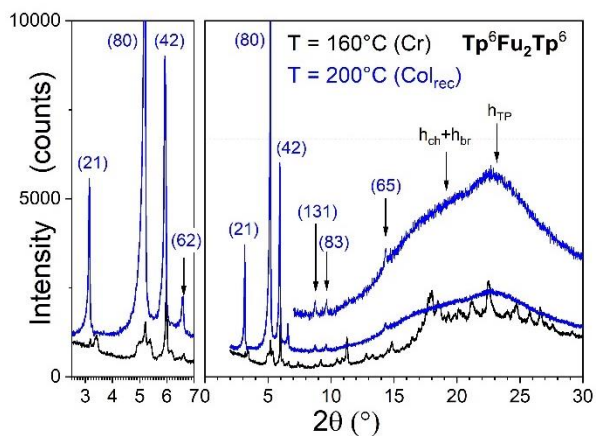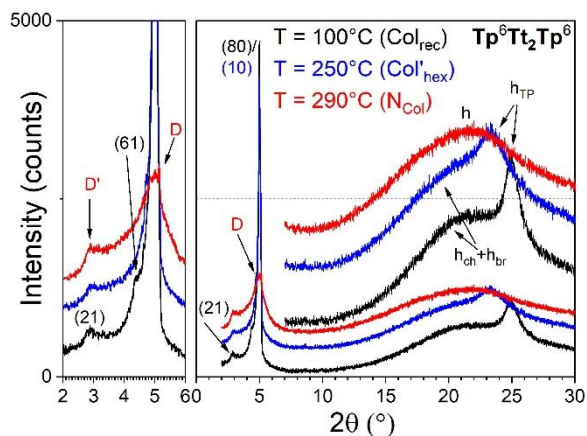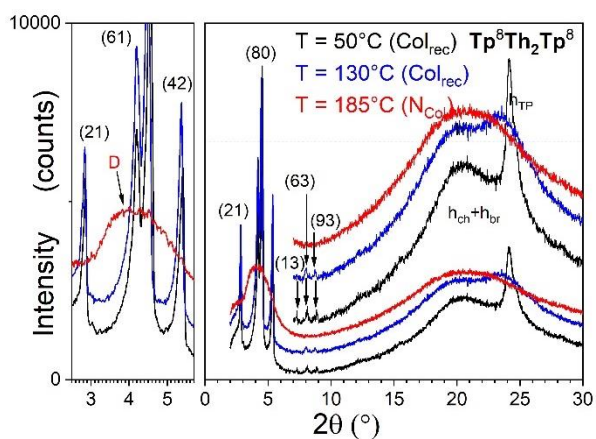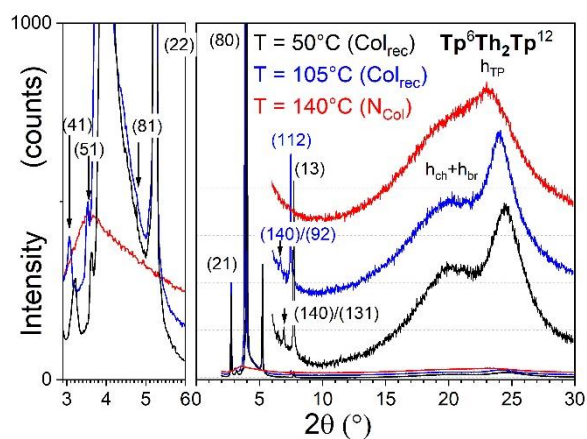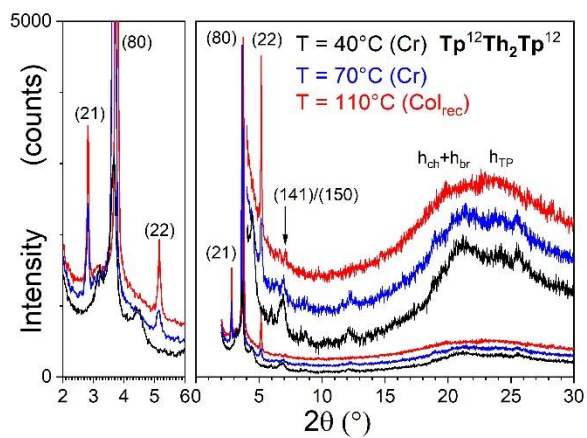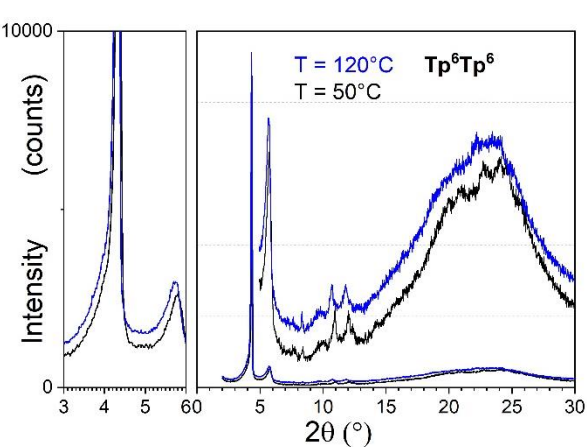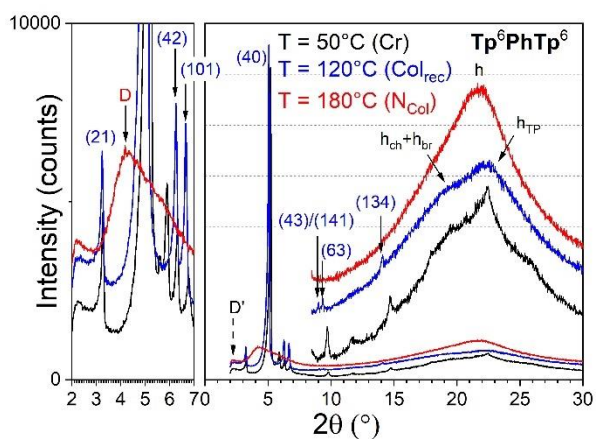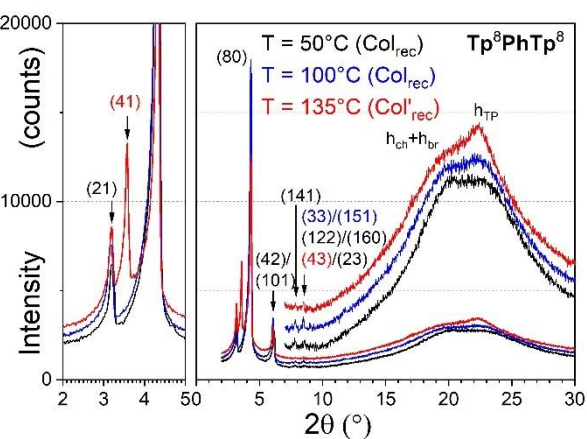

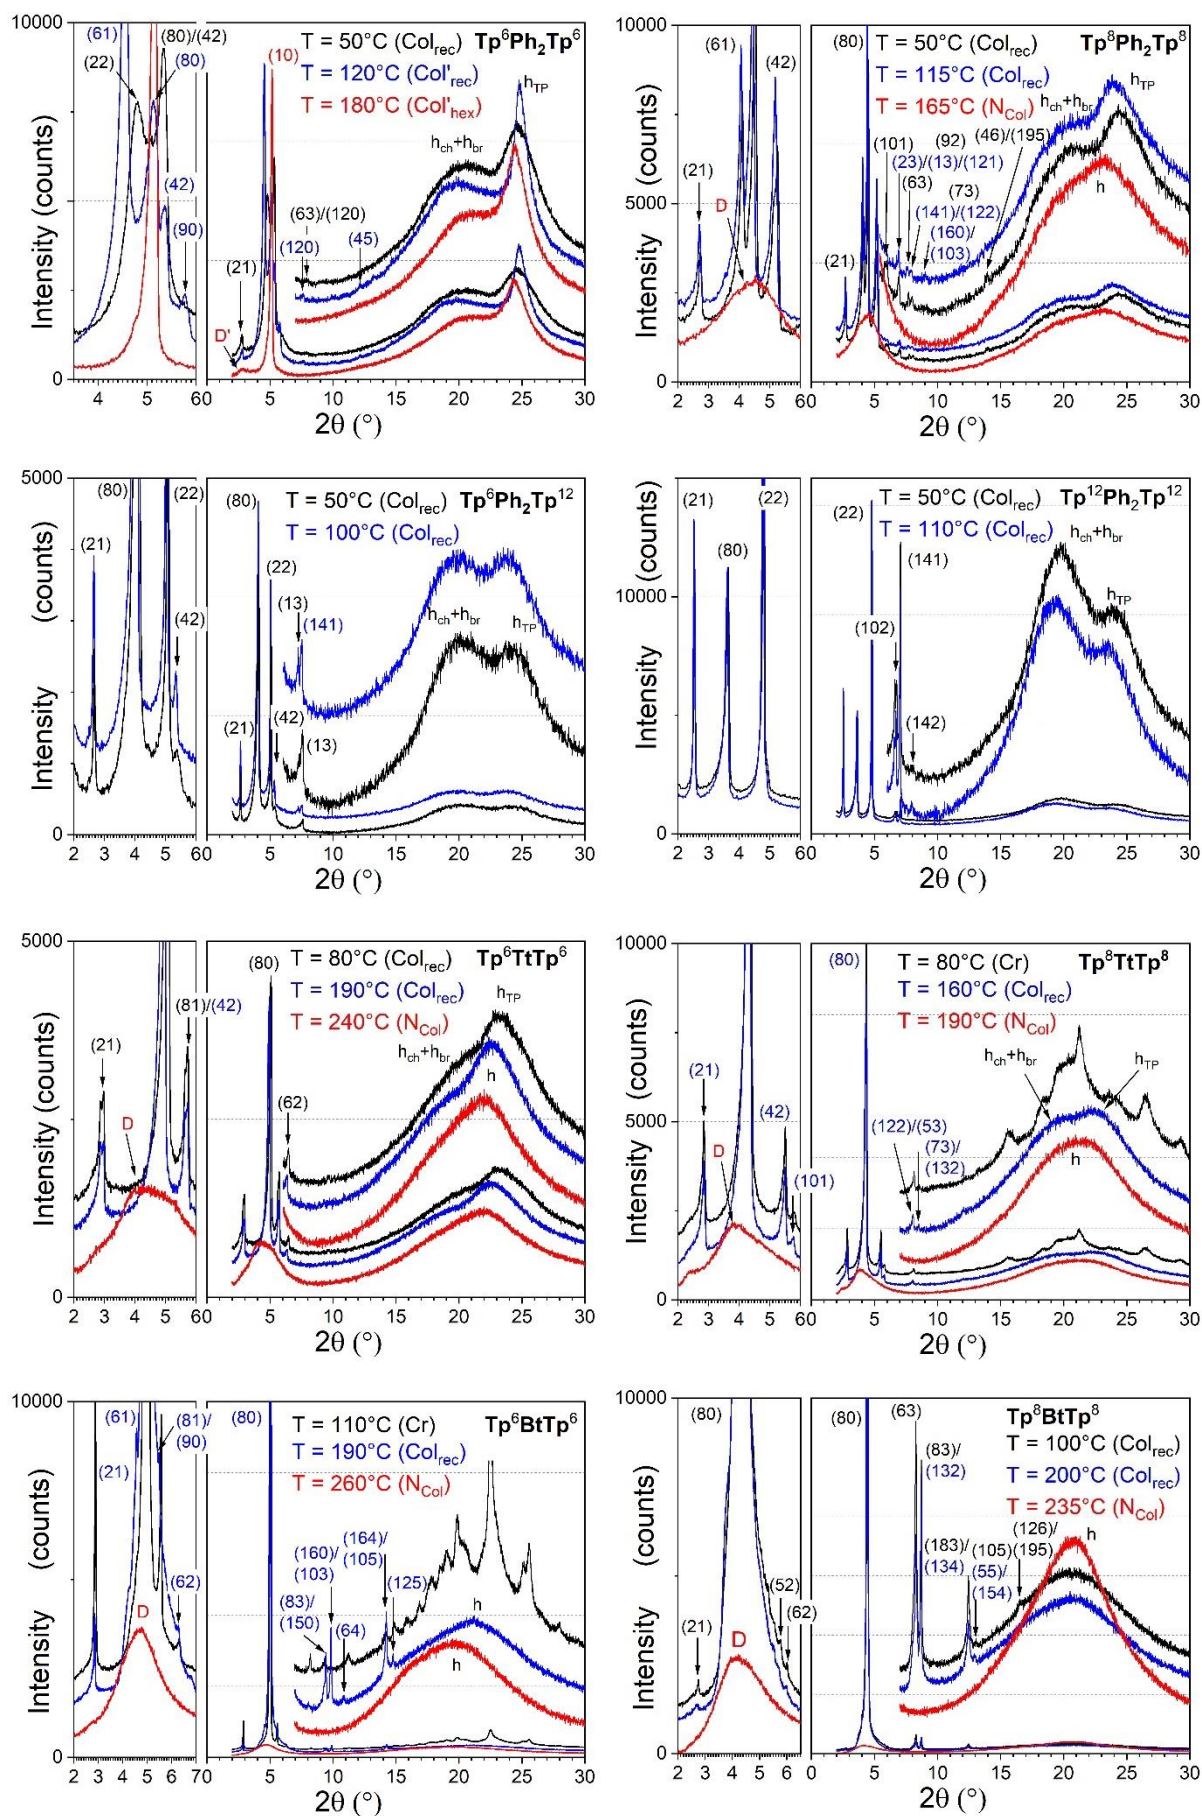

**Figure S70.** SWAXS patterns of the mesophases of the dimeric compounds (recorded on cooling), with indexations (considering the small lattice).

**Table S13.** Table of indexation of mesophases of the  $\pi$ -bridged dimeric compounds.

| $2\theta_{exp}$                                                                                                                                                                                                                        | $d_{exp}$ | l  | Line shape<br>( $\xi$ ) | Single lattice  |                          | Double lattice  |            | $\Delta$  |
|----------------------------------------------------------------------------------------------------------------------------------------------------------------------------------------------------------------------------------------|-----------|----|-------------------------|-----------------|--------------------------|-----------------|------------|-----------|
|                                                                                                                                                                                                                                        |           |    |                         | hk              | $d_{calc}$               | hk              | $d_{calc}$ |           |
| <b><math>Tp^6Th_2Tp^6</math> (T = 200°C): <math>N_{Col}</math>;</b><br>D = 17.96Å                                                                                                                                                      |           |    |                         |                 |                          |                 |            |           |
| 2.45                                                                                                                                                                                                                                   | 36.03     | VW | br                      |                 | D'~2D                    |                 | -          | -         |
| 4.92                                                                                                                                                                                                                                   | 17.94     | S  | br (33)                 |                 | D                        |                 | -          | -         |
| 22.43                                                                                                                                                                                                                                  | 3.96      | VS | br (6)                  |                 | $h=h_{ch}+h_{br}+h_{TP}$ |                 | -          | -         |
| <b><math>Tp^6Th_2Tp^6</math> (T = 120°C): <math>Col_{rec}</math>;</b><br>$a_{rec} = 67.00\text{Å}$ ; $b_{rec} = 35.01\text{Å}$ ; $\gamma = 90^\circ$<br>→ $a_{rec} = 134.00\text{Å}$ ; $b_{rec} = 35.01\text{Å}$ ; $\gamma = 90^\circ$ |           |    |                         |                 |                          |                 |            |           |
| 2.84(5)                                                                                                                                                                                                                                | 31.03     | M  | sh                      | 11              | 31.03                    | 21              | 31.03      | 0.00      |
| 4.66(1)                                                                                                                                                                                                                                | 18.94     | M  | sh                      | 31              | 18.83                    | 61              | 18.83      | 0.11      |
| 5.03(9)                                                                                                                                                                                                                                | 17.52     | S  | sh                      | 02              | 17.51                    | 02              | 17.51      | 0.01      |
| 5.27(1)                                                                                                                                                                                                                                | 16.75     | VS | sh                      | 40              | 16.75                    | 80              | 16.75      | 0.00      |
| 5.68(2)                                                                                                                                                                                                                                | 15.54     | S  | sh                      | 22              | 15.51                    | 42              | 15.51      | 0.03      |
| 18.98                                                                                                                                                                                                                                  | 4.68      | VS | br                      | $h_{ch}+h_{br}$ | -                        | $h_{ch}+h_{br}$ | -          | -         |
| 23.89                                                                                                                                                                                                                                  | 3.72      | VS | sh (9)                  | $h_{TP}$        | -                        | $h_{TP}$        | -          | -         |
| <b><math>Tp^6Th_2Tp^6</math> (T = 50°C): <math>Col'_{hex}</math>;</b><br>$a_{hex} = 19.64\text{Å}$ ; $\gamma = 120^\circ$                                                                                                              |           |    |                         |                 |                          |                 |            |           |
| 2.63                                                                                                                                                                                                                                   | 33.57     | VW | br                      |                 | sp                       |                 | -          | -         |
| 5.19(1)                                                                                                                                                                                                                                | 17.01     | VS | sh                      |                 | 10                       |                 | 17.01      | -         |
| 20.40                                                                                                                                                                                                                                  | 4.35      | VS | br                      |                 | $h_{ch}+h_{br}$          |                 | -          | -         |
| 24.84                                                                                                                                                                                                                                  | 3.58      | VS | sh (15)                 |                 | $h_{TP}$                 |                 | -          | -         |
| <b><math>Tp^6\beta-Th_2Tp^6</math> (T = 120°C): <math>Col_{hex}</math>;</b><br>$a_{hex} = 19.87\text{Å}$ ; $\gamma = 120^\circ$                                                                                                        |           |    |                         |                 |                          |                 |            |           |
| 2.96                                                                                                                                                                                                                                   | 29.81     | W  | br                      |                 | D'                       |                 | -          | -         |
| 5.13(0)                                                                                                                                                                                                                                | 17.21     | VS | sh                      |                 | 10                       |                 | 17.21      | -         |
| 20.24                                                                                                                                                                                                                                  | 4.38      | VS | br                      |                 | $h_{ch}+h_{br}$          |                 | -          | -         |
| 24.52                                                                                                                                                                                                                                  | 3.63      | VS | sh (23)                 |                 | $h_{TP}$                 |                 | -          | -         |
| <b><math>Tp^6\beta-Th_2Tp^6</math> (T = 80°C): <math>Col_{hex}</math>;</b><br>$a_{hex} = 19.81\text{Å}$ ; $\gamma = 120^\circ$                                                                                                         |           |    |                         |                 |                          |                 |            |           |
| 2.97                                                                                                                                                                                                                                   | 29.70     | W  | br                      |                 | D'                       |                 | -          | -         |
| 5.14(7)                                                                                                                                                                                                                                | 17.15     | VS | sh                      |                 | 10                       |                 | 17.15      | 0.00      |
| 20.65                                                                                                                                                                                                                                  | 4.30      | VS | br                      |                 | $h_{ch}+h_{br}$          |                 | -          | -         |
| 24.99                                                                                                                                                                                                                                  | 3.58      | VS | sh (31)                 |                 | $h_{TP}$                 |                 | -          | -         |
| <b><math>Tp^6\beta-Th_2Tp^6</math> (T = 40°C): <math>Col_{hex}</math>;</b><br>$a_{hex} = 19.73\text{Å}$ ; $\gamma = 120^\circ$                                                                                                         |           |    |                         |                 |                          |                 |            |           |
| 2.98                                                                                                                                                                                                                                   | 29.58     | W  | br                      |                 | D'                       |                 | -          | -         |
| 5.16(8)                                                                                                                                                                                                                                | 17.08     | VS | sh                      |                 | 10                       |                 | 17.08      | 0.00      |
| 20.84                                                                                                                                                                                                                                  | 4.26      | VS | br                      |                 | $h_{ch}+h_{br}$          |                 | -          | -         |
| 25.11                                                                                                                                                                                                                                  | 3.54      | VS | sh (33)                 |                 | $h_{TP}$                 |                 | -          | -         |
| <b><math>Tp^6Fu_2Tp^6</math> (T = 200°C): <math>Col_{rec}</math>;</b><br>$a_{rec} = 69.56\text{Å}$ ; $b_{rec} = 32.08\text{Å}$ ; $\gamma = 90^\circ$<br>→ $a_{rec} = 139.12\text{Å}$ ; $b_{rec} = 32.08\text{Å}$ ; $\gamma = 90^\circ$ |           |    |                         |                 |                          |                 |            |           |
| 3.03(0)                                                                                                                                                                                                                                | 29.13     | S  | sh                      | 11              | 29.13                    | 21              | 29.13      | 0.00      |
| 5.08(8)                                                                                                                                                                                                                                | 17.39     | VS | sh                      | 40              | 17.39                    | 80              | 17.39      | 0.00      |
| 6.06(5)                                                                                                                                                                                                                                | 14.56     | S  | sh                      | 22              | 14.56                    | 42              | 14.56      | 0.00      |
| 6.62(9)                                                                                                                                                                                                                                | 13.32     | M  | sh                      | 32              | 13.19                    | 62              | 13.19      | 0.13      |
| 8.74(2)                                                                                                                                                                                                                                | 10.11     | M  | sh                      | 23              | 10.22                    | 131             | 10.15      | 0.11/0.04 |
| 9.64(9)                                                                                                                                                                                                                                | 9.16      | M  | sh                      | 43              | 9.11                     | 83              | 9.11       | 0.05      |
| 14.28(9)                                                                                                                                                                                                                               | 6.19      | M  | sh                      | 35/111          | 6.18/6.20                | 65              | 6.18       | 0.01      |
| 18.87                                                                                                                                                                                                                                  | 4.70      | VS | br                      | $h_{ch}+h_{br}$ | -                        | $h_{ch}+h_{br}$ | -          | -         |
| 22.70                                                                                                                                                                                                                                  | 3.91      | VS | br                      | $h_{TP}$        | -                        | $h_{TP}$        | -          | -         |
| <b><math>Tp^6Tt_2Tp^6</math> (T = 290°C): <math>N_{Col}</math>;</b><br>D = 18.15Å                                                                                                                                                      |           |    |                         |                 |                          |                 |            |           |
| 2.81                                                                                                                                                                                                                                   | 31.44     | W  | br                      |                 | D'                       |                 | -          | -         |
| 4.86                                                                                                                                                                                                                                   | 18.15     | S  | br (46)                 |                 | D                        |                 | -          | -         |
| 21.84                                                                                                                                                                                                                                  | 4.06      | VS | br                      |                 | $h=h_{ch}+h_{br}+h_{TP}$ |                 | -          | -         |
| <b><math>Tp^6Tt_2Tp^6</math> (T = 250°C): <math>Col'_{hex}</math>;</b><br>$a_{hex} = 20.95\text{Å}$                                                                                                                                    |           |    |                         |                 |                          |                 |            |           |
| 2.87                                                                                                                                                                                                                                   | 30.76     | W  | br                      |                 | D'                       |                 | -          | 0.00      |
| 4.86(4)                                                                                                                                                                                                                                | 18.15     | VS | sh                      |                 | 10                       |                 | 18.15      | 0.00      |
| 20.22                                                                                                                                                                                                                                  | 4.39      | VS | br                      |                 | $h_{ch}+h_{br}$          |                 | -          | -         |
| 23.05                                                                                                                                                                                                                                  | 3.85      | VS | sh (13)                 |                 | $h_{TP}$                 |                 | -          | -         |
| <b><math>Tp^6Tt_2Tp^6</math> (T = 100°C): <math>Col_{rec}</math>;</b><br>$a_{rec} = 70.64\text{Å}$ ; $b_{rec} = 33.98\text{Å}$ ; $\gamma = 90^\circ$<br>→ $a_{rec} = 141.28\text{Å}$ ; $b_{rec} = 33.98\text{Å}$ ; $\gamma = 90^\circ$ |           |    |                         |                 |                          |                 |            |           |



|                                                                                                                                                                                                                                        |       |    |         |                          |             |                 |             |           |
|----------------------------------------------------------------------------------------------------------------------------------------------------------------------------------------------------------------------------------------|-------|----|---------|--------------------------|-------------|-----------------|-------------|-----------|
| 2.88                                                                                                                                                                                                                                   | 30.62 | W  | br      | 11                       | 30.62       | 21              | 30.62       | 0.00      |
| 4.54                                                                                                                                                                                                                                   | 19.45 | W  | sh      | 31                       | 19.35       | 61              | 19.35       | 0.10      |
| 5.00(0)                                                                                                                                                                                                                                | 17.66 | VS | sh      | 40                       | 17.66       | 80              | 17.66       | 0.00      |
| 20.85                                                                                                                                                                                                                                  | 4.26  | VS | br      | $h_{ch}+h_{br}$          | -           | $h_{ch}+h_{br}$ | -           | -         |
| 25.02                                                                                                                                                                                                                                  | 3.55  | VS | sh (35) | $h_{TP}$                 | -           | $h_{TP}$        | -           | -         |
| <b><math>Tp^8Th_2Tp^8</math> (T = 185°C): <math>N_{Col}</math>;</b><br>D = 21.38Å                                                                                                                                                      |       |    |         |                          |             |                 |             |           |
| 4.13                                                                                                                                                                                                                                   | 21.38 | VS | br (24) | D                        |             |                 | -           | -         |
| 21.54                                                                                                                                                                                                                                  | 4.12  | VS | br      | $h=h_{ch}+h_{br}+h_{TP}$ |             |                 | -           | -         |
| <b><math>Tp^8Th_2Tp^8</math> (T = 130°C): <math>Col_{rec}</math>;</b><br>$a_{rec} = 78.84\text{Å}$ ; $b_{rec} = 36.15\text{Å}$ ; $\gamma = 90^\circ$<br>→ $a_{rec} = 157.68\text{Å}$ ; $b_{rec} = 36.15\text{Å}$ ; $\gamma = 90^\circ$ |       |    |         |                          |             |                 |             |           |
| 2.68(6)                                                                                                                                                                                                                                | 32.86 | S  | sh      | 11                       | 32.86       | 21              | 32.86       | 0.00      |
| 4.16(0)                                                                                                                                                                                                                                | 21.22 | S  | sh      | 31                       | 21.26       | 61              | 21.26       | 0.04      |
| 4.47(9)                                                                                                                                                                                                                                | 19.71 | VS | sh      | 40                       | 19.71       | 80              | 19.71       | 0.00      |
| 5.37(3)                                                                                                                                                                                                                                | 16.43 | S  | sh      | 22                       | 16.43       | 42              | 16.43       | 0.00      |
| 8.04(0)                                                                                                                                                                                                                                | 10.99 | W  | sh      | 33                       | 10.95       | 63              | 10.95       | 0.04      |
| 8.722(0)                                                                                                                                                                                                                               | 9.98  | W  | sh      | 80                       | 9.86        | 93              | 9.93        | 0.12/0.05 |
| 19.88                                                                                                                                                                                                                                  | 4.46  | VS | br      | $h_{ch}+h_{br}$          | -           | $h_{ch}+h_{br}$ | -           | -         |
| 23.44                                                                                                                                                                                                                                  | 3.79  | M  | br      | $h_{TP}$                 | -           | $h_{TP}$        | -           | -         |
| <b><math>Tp^8Th_2Tp^8</math> (T = 50°C): <math>Col_{rec}</math>;</b><br>$a_{rec} = 77.80\text{Å}$ ; $b_{rec} = 35.93\text{Å}$ ; $\gamma = 90^\circ$<br>→ $a_{rec} = 155.60\text{Å}$ ; $b_{rec} = 35.93\text{Å}$ ; $\gamma = 90^\circ$  |       |    |         |                          |             |                 |             |           |
| 2.85(5)                                                                                                                                                                                                                                | 32.62 | S  | sh      | 11                       | 32.62       | 21              | 32.62       | 0.00      |
| 4.20(0)                                                                                                                                                                                                                                | 21.02 | S  | sh      | 31                       | 21.03       | 61              | 21.03       | 0.01      |
| 4.54(0)                                                                                                                                                                                                                                | 19.45 | VS | sh      | 40                       | 19.45       | 80              | 19.45       | 0.00      |
| 5.41(3)                                                                                                                                                                                                                                | 16.31 | S  | sh      | 22                       | 16.31       | 42              | 16.31       | 0.00      |
| 7.41(5)                                                                                                                                                                                                                                | 11.91 | W  | sh      | 13/03                    | 11.84/11.98 | 13/130          | 11.94/11.97 | 0.07/0.03 |
| 8.14(2)                                                                                                                                                                                                                                | 10.85 | W  | sh      | 33                       | 10.87       | 63              | 10.87       | 0.02      |
| 8.97(6)                                                                                                                                                                                                                                | 9.84  | W  | sh      | 80                       | 9.72        | 93              | 9.84        | 0.12/0.00 |
| 20.06                                                                                                                                                                                                                                  | 4.42  | VS | br      | $h_{ch}+h_{br}$          | -           | $h_{ch}+h_{br}$ | -           | -         |
| 24.20                                                                                                                                                                                                                                  | 3.67  | VS | sh (67) | $h_{TP}$                 | -           | $h_{TP}$        | -           | -         |
| <b><math>Tp^6PhTp^6</math> (T = 180 °C): <math>N_{Col}</math>;</b><br>D = 21.12Å                                                                                                                                                       |       |    |         |                          |             |                 |             |           |
| 2.20                                                                                                                                                                                                                                   | 40.15 | VW | br      | D'                       |             |                 | -           | -         |
| 4.18                                                                                                                                                                                                                                   | 21.12 | S  | br      | D                        |             |                 | -           | -         |
| 21.58                                                                                                                                                                                                                                  | 4.11  | VS | br      | $h=h_{ch}+h_{br}+h_{TP}$ |             |                 | -           | -         |
| <b><math>Tp^6PhTp^6</math> (T = 120°C): <math>Col_{rec}</math>;</b><br>$a_{rec} = 72.28\text{Å}$ ; $b_{rec} = 30.47\text{Å}$ ; $\gamma = 90^\circ$<br>→ $a_{rec} = 144.56\text{Å}$ ; $b_{rec} = 30.47\text{Å}$ ; $\gamma = 90^\circ$   |       |    |         |                          |             |                 |             |           |
| 2.94(0)                                                                                                                                                                                                                                | 28.08 | S  | sh      | 11                       | 28.08       | 21              | 28.08       | 0.00      |
| 4.88(7)                                                                                                                                                                                                                                | 18.07 | VS | sh      | 40                       | 18.07       | 80              | 18.07       | 0.00      |
| 6.27(7)                                                                                                                                                                                                                                | 14.07 | S  | sh      | 22                       | 14.04       | 42              | 14.04       | 0.03      |
| 6.75(2)                                                                                                                                                                                                                                | 13.08 | S  | sh      | 51                       | 13.06       | 101             | 13.06       | 0.02      |
| 9.06(3)                                                                                                                                                                                                                                | 9.75  | W  | sh      | 71                       | 9.78        | 43/141          | 9.78        | 0.03      |
| 9.45(3)                                                                                                                                                                                                                                | 9.35  | W  | sh      | 33                       | 9.36        | 63              | 9.36        | 0.01      |
| 14.12(3)                                                                                                                                                                                                                               | 6.26  | W  | sh      | 93                       | 6.30        | 183/134         | 6.30/6.28   | 0.04/0.02 |
| 19.41                                                                                                                                                                                                                                  | 4.57  | VS | br      | $h_{ch}+h_{br}$          | -           | $h_{ch}+h_{br}$ | -           | -         |
| 22.55                                                                                                                                                                                                                                  | 3.94  | VS | br      | $h_{TP}$                 | -           | $h_{TP}$        | -           | -         |
| <b><math>Tp^6PhTp^8</math> (T = 135°C): <math>Col_{rec}</math>;</b><br>$a_{rec} = 81.72\text{Å}$ ; $b_{rec} = 32.15\text{Å}$ ; $\gamma = 90^\circ$<br>→ $a_{rec} = 163.44\text{Å}$ ; $b_{rec} = 32.15\text{Å}$ ; $\gamma = 90^\circ$   |       |    |         |                          |             |                 |             |           |
| 2.95(0)                                                                                                                                                                                                                                | 29.92 | S  | sh      | 11                       | 29.92       | 21              | 29.92       | 0.00      |
| 3.50(6)                                                                                                                                                                                                                                | 25.18 | S  | sh      | 21                       | 25.27       | 41              | 25.27       | 0.09      |
| 4.32(0)                                                                                                                                                                                                                                | 20.43 | VS | sh      | 40                       | 20.43       | 80              | 20.43       | 0.00      |
| 6.06(3)                                                                                                                                                                                                                                | 14.57 | S  | sh      | 51                       | 14.57       | 101             | 14.57       | 0.00      |
| 8.00(0)                                                                                                                                                                                                                                | 11.04 | W  | sh      | 71                       | 10.97       | 141             | 10.97       | 0.07      |
| 8.48(8)                                                                                                                                                                                                                                | 10.39 | W  | sh      | 62/23                    | 10.39/10.37 | 122/43          | 10.39/10.37 | 0.02/0.00 |
| 19.11                                                                                                                                                                                                                                  | 4.64  | VS | br      | $h_{ch}+h_{br}$          | -           | $h_{ch}+h_{br}$ | -           | -         |
| 22.40                                                                                                                                                                                                                                  | 3.96  | VS | br      | $h_{TP}$                 | -           | $h_{TP}$        | -           | -         |
| <b><math>Tp^6PhTp^8</math> (T = 100°C): <math>Col_{rec}</math>;</b><br>$a_{rec} = 82.08\text{Å}$ ; $b_{rec} = 31.59\text{Å}$ ; $\gamma = 90^\circ$<br>→ $a_{rec} = 164.16\text{Å}$ ; $b_{rec} = 31.59\text{Å}$ ; $\gamma = 90^\circ$   |       |    |         |                          |             |                 |             |           |

|                                                                                                                                                                                                                                                                            |       |    |         |                          |             |                 |             |           |
|----------------------------------------------------------------------------------------------------------------------------------------------------------------------------------------------------------------------------------------------------------------------------|-------|----|---------|--------------------------|-------------|-----------------|-------------|-----------|
| 2.99(4)                                                                                                                                                                                                                                                                    | 29.48 | S  | sh      | 11                       | 29.48       | 21              | 29.48       | 0.00      |
| 4.30(1)                                                                                                                                                                                                                                                                    | 20.52 | VS | sh      | 40                       | 20.52       | 80              | 20.52       | 0.00      |
| 6.06(2)                                                                                                                                                                                                                                                                    | 14.57 | S  | sh      | 51                       | 14.57       | 101             | 14.57       | 0.00      |
| 7.95(1)                                                                                                                                                                                                                                                                    | 11.11 | W  | sh      | 71                       | 10.99       | 141             | 10.99       | 0.12      |
| 8.56(7)                                                                                                                                                                                                                                                                    | 10.31 | W  | sh      | 62                       | 10.34       | 33/122/151      | 10.34       | 0.03      |
| 19.62                                                                                                                                                                                                                                                                      | 4.52  | VS | br      | $h_{ch}+h_{br}$          | -           | $h_{ch}+h_{br}$ | -           | -         |
| 22.46                                                                                                                                                                                                                                                                      | 3.95  | VS | br      | $h_{TP}$                 | -           | $h_{TP}$        | -           | -         |
| <b>TP<sup>8</sup>PhTP<sup>8</sup> (T = 50°C): Col<sub>rec</sub>;</b><br><b><math>a_{rec} = 81.96\text{Å}; b_{rec} = 30.97\text{Å}; \gamma = 90^\circ</math></b><br><b>→ <math>a_{rec} = 163.92\text{Å}; b_{rec} = 30.97\text{Å}; \gamma = 90^\circ</math></b>              |       |    |         |                          |             |                 |             |           |
| 3.04(7)                                                                                                                                                                                                                                                                    | 28.97 | S  | sh      | 11                       | 28.97       | 21              | 28.97       | 0.00      |
| 4.30(9)                                                                                                                                                                                                                                                                    | 20.49 | VS | sh      | 40                       | 20.49       | 80              | 20.49       | 0.00      |
| 6.09(7)                                                                                                                                                                                                                                                                    | 14.48 | S  | sh      | 22/51                    | 14.48/14.49 | 42/101          | 14.48/14.49 | 0.00/0.01 |
| 7.97(2)                                                                                                                                                                                                                                                                    | 11.08 | W  | sh      | 71                       | 10.95       | 141             | 10.95       | 0.13      |
| 8.61(5)                                                                                                                                                                                                                                                                    | 10.25 | W  | sh      | 13/80/62                 | 10.24       | 23/160/122      | 10.24       | 0.01      |
| 19.33                                                                                                                                                                                                                                                                      | 4.58  | VS | br      | $h_{ch}+h_{br}$          | -           | $h_{ch}+h_{br}$ | -           | -         |
| 22.87                                                                                                                                                                                                                                                                      | 3.88  | VS | br      | $h_{TP}$                 | -           | $h_{TP}$        | -           | -         |
| <b>TP<sup>6</sup>Ph<sub>2</sub>TP<sup>6</sup> (T = 180°C): Col<sub>hex</sub>;</b><br><b><math>a_{hex} = 19.92\text{Å}</math></b>                                                                                                                                           |       |    |         |                          |             |                 |             |           |
| 2.81                                                                                                                                                                                                                                                                       | 31.36 | W  | br      | D                        | -           | -               | -           | -         |
| 5.12(0)                                                                                                                                                                                                                                                                    | 17.25 | VS | sh      | 10                       | -           | 17.25           | -           | 0.00      |
| 20.18                                                                                                                                                                                                                                                                      | 3.40  | VS | br      | $h_{ch}+h_{br}$          | -           | -               | -           | -         |
| 24.32                                                                                                                                                                                                                                                                      | 3.66  | VS | sh (21) | $h_{TP}$                 | -           | -               | -           | -         |
| <b>TP<sup>6</sup>Ph<sub>2</sub>TP<sup>6</sup> (T = 120°C): Col<sub>rec</sub>;</b><br><b><math>a_{rec} = 68.84\text{Å}; b_{rec} = 37.51\text{Å}; \gamma = 90^\circ</math></b><br><b>→ <math>a_{rec} = 137.68\text{Å}; b_{rec} = 37.51\text{Å}; \gamma = 90^\circ</math></b> |       |    |         |                          |             |                 |             |           |
| 2.67(9)                                                                                                                                                                                                                                                                    | 32.94 | M  | sh      | 11                       | 32.94       | 21              | 32.94       | 0.00      |
| 4.51(4)                                                                                                                                                                                                                                                                    | 19.56 | VS | sh      | 31                       | 19.57       | 61              | 19.57       | 0.01      |
| 5.11(8)                                                                                                                                                                                                                                                                    | 17.21 | VS | sh      | 40                       | 17.21       | 80              | 17.21       | 0.00      |
| 5.36(0)                                                                                                                                                                                                                                                                    | 16.46 | S  | sh      | 22                       | 16.47       | 42              | 16.47       | 0.01      |
| 5.75(1)                                                                                                                                                                                                                                                                    | 15.35 | M  | sh      | 41                       | 15.64       | 90              | 15.30       | 0.29/0.05 |
| 7.67(2)                                                                                                                                                                                                                                                                    | 11.51 | W  | sh      | 60                       | 11.47       | 120             | 11.47       | 0.04      |
| 12.10(2)                                                                                                                                                                                                                                                                   | 7.31  | W  | sh      | 25                       | 7.33        | 45              | 7.33        | 0.02      |
| 20.21                                                                                                                                                                                                                                                                      | 4.39  | VS | br      | $h_{ch}+h_{br}$          | -           | $h_{ch}+h_{br}$ | -           | -         |
| 24.79                                                                                                                                                                                                                                                                      | 3.59  | VS | sh (42) | $h_{TP}$                 | -           | $h_{TP}$        | -           | -         |
| <b>TP<sup>6</sup>Ph<sub>2</sub>TP<sup>6</sup> (T = 50°C): Col<sub>rec</sub>;</b><br><b><math>a_{rec} = 66.16\text{Å}; b_{rec} = 38.19\text{Å}; \gamma = 90^\circ</math></b><br><b>→ <math>a_{rec} = 132.32\text{Å}; b_{rec} = 38.19\text{Å}; \gamma = 90^\circ</math></b>  |       |    |         |                          |             |                 |             |           |
| 2.66(8)                                                                                                                                                                                                                                                                    | 33.08 | M  | sh      | 11                       | 33.08       | 21              | 33.08       | 0.00      |
| 4.81(0)                                                                                                                                                                                                                                                                    | 18.36 | VS | sh      | 12                       | 18.35       | 22              | 18.35       | 0.01      |
| 5.34(0)                                                                                                                                                                                                                                                                    | 16.54 | VS | sh      | 40                       | 16.54       | 80/42           | 16.54       | 0.00      |
| 7.99(0)                                                                                                                                                                                                                                                                    | 11.04 | W  | sh      | 33                       | 11.02       | 63/120          | 11.02       | 0.02      |
| 19.90                                                                                                                                                                                                                                                                      | 4.46  | VS | br      | $h_{ch}+h_{br}$          | -           | $h_{ch}+h_{br}$ | -           | -         |
| 24.94                                                                                                                                                                                                                                                                      | 3.57  | VS | sh (32) | $h_{TP}$                 | -           | $h_{TP}$        | -           | -         |
| <b>TP<sup>8</sup>Ph<sub>2</sub>TP<sup>8</sup> (T = 165°C): N<sub>col</sub>;</b><br><b>D = 20.20Å</b>                                                                                                                                                                       |       |    |         |                          |             |                 |             |           |
| 4.37                                                                                                                                                                                                                                                                       | 20.20 | VS | br (23) | D                        | -           | -               | -           | -         |
| 22.92                                                                                                                                                                                                                                                                      | 3.88  | VS | br      | $h=h_{ch}+h_{br}+h_{TP}$ | -           | -               | -           | -         |
| <b>TP<sup>8</sup>Ph<sub>2</sub>TP<sup>8</sup> (T = 115°C): Col<sub>rec</sub>;</b><br><b><math>a_{rec} = 79.52\text{Å}; b_{rec} = 38.02\text{Å}; \gamma = 90^\circ</math></b><br><b>→ <math>a_{rec} = 159.04\text{Å}; b_{rec} = 38.02\text{Å}; \gamma = 90^\circ</math></b> |       |    |         |                          |             |                 |             |           |
| 2.57(3)                                                                                                                                                                                                                                                                    | 34.30 | S  | sh      | 11                       | 34.30       | 21              | 34.30       | 0.00      |
| 4.06(1)                                                                                                                                                                                                                                                                    | 21.74 | S  | sh      | 31                       | 21.74       | 61              | 21.74       | 0.00      |
| 4.44(1)                                                                                                                                                                                                                                                                    | 19.88 | VS | sh      | 40                       | 19.88       | 80              | 19.88       | 0.00      |
| 5.18(0)                                                                                                                                                                                                                                                                    | 17.05 | S  | sh      | 22                       | 17.15       | 42              | 17.15       | 0.10      |
| 7.02(2)                                                                                                                                                                                                                                                                    | 12.58 | M  | sh      | 13/61                    | 12.51       | 13/23/121       | 12.51/12.63 | 0.07/0.05 |
| 7.71(0)                                                                                                                                                                                                                                                                    | 11.46 | W  | sh      | 33                       | 11.43       | 63              | 11.43       | 0.03      |
| 8.06(7)                                                                                                                                                                                                                                                                    | 10.95 | W  | sh      | 71/62                    | 10.88/10.87 | 141/122         | 10.88/10.87 | 0.07/0.08 |
| 8.89(0)                                                                                                                                                                                                                                                                    | 9.93  | W  | sh      | 80/53                    | 9.94/9.91   | 160/103         | 9.94/9.91   | 0.01/0.02 |
| 20.08                                                                                                                                                                                                                                                                      | 4.42  | VS | br      | $h_{ch}+h_{br}$          | -           | $h_{ch}+h_{br}$ | -           | -         |
| 24.04                                                                                                                                                                                                                                                                      | 3.70  | VS | br (13) | $h_{TP}$                 | -           | $h_{TP}$        | -           | -         |
| <b>TP<sup>8</sup>Ph<sub>2</sub>TP<sup>8</sup> (T = 50°C): Col<sub>rec</sub>;</b><br><b><math>a_{rec} = 78.12\text{Å}; b_{rec} = 37.57\text{Å}; \gamma = 90^\circ</math></b><br><b>→ <math>a_{rec} = 156.24\text{Å}; b_{rec} = 37.57\text{Å}; \gamma = 90^\circ</math></b>  |       |    |         |                          |             |                 |             |           |
| 2.60(7)                                                                                                                                                                                                                                                                    | 33.86 | S  | sh      | 11                       | 33.86       | 21              | 33.86       | 0.00      |
| 4.12(3)                                                                                                                                                                                                                                                                    | 21.40 | S  | sh      | 31                       | 21.40       | 61              | 21.40       | 0.00      |
| 4.52(0)                                                                                                                                                                                                                                                                    | 19.53 | VS | sh      | 40                       | 19.53       | 80              | 19.53       | 0.00      |
| 5.20(2)                                                                                                                                                                                                                                                                    | 16.97 | S  | sh      | 22                       | 16.93       | 42              | 16.93       | 0.04      |
| 6.11(7)                                                                                                                                                                                                                                                                    | 14.44 | W  | sh      | 51                       | 14.43       | 101             | 14.43       | 0.01      |

|                                                                                                                                                                                                                      |       |    |         |                          |           |                 |             |           |  |
|----------------------------------------------------------------------------------------------------------------------------------------------------------------------------------------------------------------------|-------|----|---------|--------------------------|-----------|-----------------|-------------|-----------|--|
| 6.92(8)                                                                                                                                                                                                              | 12.75 | M  | sh      | x                        | x         | 92              | 12.75       | 0.01      |  |
| 7.83(0)                                                                                                                                                                                                              | 11.28 | W  | sh      | 33                       | 11.29     | 63              | 11.29       | 0.01      |  |
| 8.06(5)                                                                                                                                                                                                              | 10.95 | W  | sh      | x                        | x         | 73              | 10.92       | 0.03      |  |
| 14.31(9)                                                                                                                                                                                                             | 6.18  | W  | sh      | 26                       | 6.18      | 46/195          | 6.18        | 0.00      |  |
| 19.37                                                                                                                                                                                                                | 4.58  | VS | br      | $h_{ch}+h_{br}$          | -         | $h_{ch}+h_{br}$ | -           | -         |  |
| 24.56                                                                                                                                                                                                                | 3.62  | VS | br (6)  | $h_{TP}$                 | -         | $h_{TP}$        | -           | -         |  |
| <b>TP<sup>6</sup>TtTP<sup>6</sup> (T = 240°C): N<sub>col</sub>;</b><br>D = 19.46Å                                                                                                                                    |       |    |         |                          |           |                 |             |           |  |
| 4.54                                                                                                                                                                                                                 | 19.46 | VS | br (23) | D                        |           |                 | -           | -         |  |
| 21.75                                                                                                                                                                                                                | 4.08  | VS | br      | $h=h_{ch}+h_{br}+h_{TP}$ |           |                 | -           | -         |  |
| <b>TP<sup>6</sup>TtTP<sup>6</sup> (T = 190°C): Col<sub>rec</sub>;</b><br><b>a<sub>rec</sub> = 72.96Å; b<sub>rec</sub> = 33.85Å; γ = 90°</b><br><b>→ a<sub>rec</sub> = 145.92Å; b<sub>rec</sub> = 33.85Å; γ = 90°</b> |       |    |         |                          |           |                 |             |           |  |
| 2.86(5)                                                                                                                                                                                                              | 30.71 | S  | sh      | 11                       | 30.71     | 21              | 30.71       | 0.00      |  |
| 4.84(0)                                                                                                                                                                                                              | 18.24 | VS | sh      | 40                       | 18.24     | 80              | 18.24       | 0.00      |  |
| 5.75(1)                                                                                                                                                                                                              | 15.35 | S  | sh      | 22                       | 15.35     | 42              | 15.35       | 0.00      |  |
| 6.36(5)                                                                                                                                                                                                              | 13.87 | M  | sh      | 32                       | 13.89     | 62              | 13.89       | 0.02      |  |
| 19.36                                                                                                                                                                                                                | 4.58  | VS | br      | $h_{ch}+h_{br}$          | -         | $h_{ch}+h_{br}$ | -           | -         |  |
| 22.64                                                                                                                                                                                                                | 3.92  | VS | br (8)  | $h_{TP}$                 | -         | $h_{TP}$        | -           | -         |  |
| <b>TP<sup>6</sup>TtTP<sup>6</sup> (T = 80°C): Col<sub>rec</sub>;</b><br><b>a<sub>rec</sub> = 71.52Å; b<sub>rec</sub> = 32.67Å; γ = 90°</b><br><b>→ a<sub>rec</sub> = 143.04Å; b<sub>rec</sub> = 32.67Å; γ = 90°</b>  |       |    |         |                          |           |                 |             |           |  |
| 2.97(0)                                                                                                                                                                                                              | 29.72 | S  | sh      | 11                       | 29.72     | 21              | 29.72       | 0.00      |  |
| 4.93(8)                                                                                                                                                                                                              | 17.88 | VS | sh      | 40                       | 17.88     | 80              | 17.88       | 0.00      |  |
| 5.64(7)                                                                                                                                                                                                              | 15.64 | VS | sh      | 41                       | 15.68     | 81              | 15.68       | 0.04      |  |
| 6.55(2)                                                                                                                                                                                                              | 13.48 | S  | sh      | 32                       | 13.47     | 62              | 13.47       | 0.01      |  |
| 19.36                                                                                                                                                                                                                | 4.58  | VS | br      | $h_{ch}+h_{br}$          | -         | $h_{ch}+h_{br}$ | -           | -         |  |
| 23.25                                                                                                                                                                                                                | 3.81  | VS | br      | $h_{TP}$                 | -         | $h_{TP}$        | -           | -         |  |
| <b>TP<sup>8</sup>TtTP<sup>8</sup> (T = 190°C): N<sub>col</sub>;</b><br>D = 21.59Å                                                                                                                                    |       |    |         |                          |           |                 |             |           |  |
| 4.09                                                                                                                                                                                                                 | 21.59 | VS | br (31) | D                        |           |                 | -           | -         |  |
| 21.29                                                                                                                                                                                                                | 4.17  | VS | br      | $h=h_{ch}+h_{br}+h_{TP}$ |           |                 | -           | -         |  |
| <b>TP<sup>8</sup>TtTP<sup>8</sup> (T = 160°C): Col<sub>rec</sub>;</b><br><b>a<sub>rec</sub> = 85.24Å; b<sub>rec</sub> = 34.80Å; γ = 90°</b><br><b>→ a<sub>rec</sub> = 170.48Å; b<sub>rec</sub> = 34.80Å; γ = 90°</b> |       |    |         |                          |           |                 |             |           |  |
| 2.73(9)                                                                                                                                                                                                              | 32.22 | S  | sh      | 11                       | 32.22     | 21              | 32.22       | 0.00      |  |
| 4.14(3)                                                                                                                                                                                                              | 21.31 | VS | sh      | 40                       | 21.31     | 80              | 21.31       | 0.00      |  |
| 5.48(1)                                                                                                                                                                                                              | 16.11 | S  | sh      | 22                       | 16.11     | 42              | 16.11       | 0.00      |  |
| 5.77(3)                                                                                                                                                                                                              | 15.30 | M  | sh      | 51                       | 15.31     | 101             | 15.31       | 0.01      |  |
| 8.04(0)                                                                                                                                                                                                              | 10.99 | M  | sh      | 62                       | 11.00     | 122/53          | 11.00/10.98 | 0.01      |  |
| 8.38(8)                                                                                                                                                                                                              | 10.53 | W  | sh      | 80                       | 10.65     | 73/132          | 10.47       | 0.12/0.06 |  |
| 18.14                                                                                                                                                                                                                | 4.88  | VS | br      | $h_{ch}+h_{br}$          | -         | $h_{ch}+h_{br}$ | -           | -         |  |
| 23.20                                                                                                                                                                                                                | 3.83  | VS | br      | $h_{TP}$                 | -         | $h_{TP}$        | -           | -         |  |
| <b>TP<sup>6</sup>BtTP<sup>6</sup> (T = 260°C): N<sub>col</sub>;</b><br>D = 18.69Å                                                                                                                                    |       |    |         |                          |           |                 |             |           |  |
| 4.72                                                                                                                                                                                                                 | 18.69 | VS | br (35) | D                        |           |                 | -           | -         |  |
| 19.60                                                                                                                                                                                                                | 4.52  | VS | br      | $h=h_{ch}+h_{br}+h_{TP}$ |           |                 | -           | -         |  |
| <b>TP<sup>6</sup>BtTP<sup>6</sup> (T = 190°C): Col<sub>rec</sub>;</b><br><b>a<sub>rec</sub> = 71.52Å; b<sub>rec</sub> = 34.40Å; γ = 90°</b><br><b>→ a<sub>rec</sub> = 143.04Å; b<sub>rec</sub> = 34.40Å; γ = 90°</b> |       |    |         |                          |           |                 |             |           |  |
| 2.84(7)                                                                                                                                                                                                              | 31.00 | M  | sh      | 11                       | 31.00     | 21              | 31.00       | 0.00      |  |
| 4.53(0)                                                                                                                                                                                                              | 19.49 | S  | sh      | 31                       | 19.59     | 61              | 19.59       | 0.10      |  |
| 4.93(8)                                                                                                                                                                                                              | 17.88 | VS | sh      | 40                       | 17.88     | 80              | 17.88       | 0.00      |  |
| 5.56(0)                                                                                                                                                                                                              | 15.88 | M  | sh      | 41                       | 15.86     | 81/90           | 15.86/15.89 | 0.02/0.01 |  |
| 6.35(7)                                                                                                                                                                                                              | 13.89 | M  | sh      | 32                       | 13.95     | 62              | 13.95       | 0.06      |  |
| 9.28(6)                                                                                                                                                                                                              | 9.51  | W  | sh      | 43                       | 9.65      | 83/150          | 9.65/9.54   | 0.14/0.03 |  |
| 9.90(0)                                                                                                                                                                                                              | 8.96  | M  | sh      | 53/80                    | 8.95/8.94 | 103/160         | 8.95/8.94   | 0.01/0.02 |  |
| 10.94(0)                                                                                                                                                                                                             | 8.08  | W  | sh      | 34                       | 8.09      | 64              | 8.09        | 0.01      |  |
| 14.27(2)                                                                                                                                                                                                             | 6.20  | M  | sh      | 84/55                    | 6.20      | 164/105         | 6.20        | 0.00      |  |
| 14.84(9)                                                                                                                                                                                                             | 5.96  | W  | sh      | 120/65                   | 5.96      | 125             | 5.96        | 0.00      |  |
| 21.01                                                                                                                                                                                                                | 4.21  | VS | br      | $h=h_{ch}+h_{br}+h_{TP}$ | -         | h               | -           | -         |  |
| <b>TP<sup>8</sup>BtTP<sup>8</sup> (T = 235°C): N<sub>col</sub>; D = 20.24Å</b>                                                                                                                                       |       |    |         |                          |           |                 |             |           |  |
| 4.36                                                                                                                                                                                                                 | 20.24 | VS | br (35) | D                        |           |                 | -           | -         |  |
| 20.88                                                                                                                                                                                                                | 4.25  | VS | br      | $h=h_{ch}+h_{br}+h_{TP}$ |           |                 | -           | -         |  |
| <b>TP<sup>8</sup>BtTP<sup>8</sup> (T = 200°C): Col<sub>rec</sub>;</b><br><b>a<sub>rec</sub> = 81.92Å; b<sub>rec</sub> = 34.78Å; γ = 90°</b><br><b>→ a<sub>rec</sub> = 163.84Å; b<sub>rec</sub> = 34.78Å; γ = 90°</b> |       |    |         |                          |           |                 |             |           |  |

|                                                                                                                                                                                                                                    |       |     |    |                          |                |                 |             |           |
|------------------------------------------------------------------------------------------------------------------------------------------------------------------------------------------------------------------------------------|-------|-----|----|--------------------------|----------------|-----------------|-------------|-----------|
| 2.74(9)                                                                                                                                                                                                                            | 32.10 | VW  | sh | 11                       | 32.01          | 21              | 32.01       | 0.09      |
| 4.31(1)                                                                                                                                                                                                                            | 20.48 | VS  | sh | 40                       | 20.48          | 80              | 20.48       | 0.00      |
| 6.00(8)                                                                                                                                                                                                                            | 14.70 | W   | sh | 32                       | 14.67          | 62              | 14.67       | 0.03      |
| 8.29(0)                                                                                                                                                                                                                            | 10.66 | M   | sh | 33                       | 10.67          | 63              | 10.67       | 0.01      |
| 8.69(9)                                                                                                                                                                                                                            | 10.16 | M   | sh | 43/80                    | 10.09/10.24    | 83/132          | 10.09/10.20 | 0.07/0.04 |
| 12.37(7)                                                                                                                                                                                                                           | 7.14  | M   | sh | 93                       | 7.16           | 183/134         | 7.16        | 0.02      |
| 12.96(6)                                                                                                                                                                                                                           | 6.82  | W   | sh | 25/112                   | 6.86/6.85      | 55/154          | 6.80        | 0.04-0.02 |
| 20.65                                                                                                                                                                                                                              | 4.30  | VS  | br | $h=h_{ch}+h_{br}+h_{TP}$ | -              | h               | -           | -         |
| <b>TP<sup>8</sup>BtTP<sup>8</sup> (T = 100°C): Col<sub>rec</sub>;</b><br><b>a<sub>rec</sub> = 81.44Å; b<sub>rec</sub> = 34.81Å; γ = 90°</b><br><b>→ a<sub>rec</sub> = 162.88Å; b<sub>rec</sub> = 34.81Å; γ = 90°</b>               |       |     |    |                          |                |                 |             |           |
| 2.75(2)                                                                                                                                                                                                                            | 32.08 | VVW | sh | 11                       | 32.01          | 21              | 32.01       | 0.07      |
| 4.33(6)                                                                                                                                                                                                                            | 20.36 | VS  | sh | 40                       | 20.36          | 80              | 20.36       | 0.00      |
| 5.74(1)                                                                                                                                                                                                                            | 15.38 | W   | sh | x                        | x              | 52              | 15.35       | 0.03      |
| 6.01(5)                                                                                                                                                                                                                            | 14.68 | W   | sh | 32                       | 14.65          | 62              | 14.65       | 0.03      |
| 8.29(0)                                                                                                                                                                                                                            | 10.66 | S   | sh | 33                       | 10.67          | 63              | 10.67       | 0.01      |
| 8.73(0)                                                                                                                                                                                                                            | 10.12 | S   | sh | 43                       | 10.08          | 83              | 10.08       | 0.04      |
| 12.45(0)                                                                                                                                                                                                                           | 7.10  | M   | sh | 93                       | 7.13           | 183             | 7.13        | 0.03      |
| 13.07(2)                                                                                                                                                                                                                           | 6.41  | W   | sh | 55                       | 6.40           | 105             | 6.40        | 0.01      |
| 16.48(6)                                                                                                                                                                                                                           | 5.37  | VW  | sh | 66/124/151               | 5.33/5.35/5.36 | 195/126         | 5.40/5.33   | 0.03/0.04 |
| 20.74                                                                                                                                                                                                                              | 4.28  | VS  | br | $h=h_{ch}+h_{br}+h_{TP}$ | -              | h               | -           | -         |
| <b>TP<sup>6</sup>Ph<sub>2</sub>TP<sup>12</sup> (T = 100°C): Col<sub>rec</sub>;</b><br><b>a<sub>rec</sub> = 86.64Å; b<sub>rec</sub> = 35.96Å; γ = 90°</b><br><b>→ a<sub>rec</sub> = 173.28Å; b<sub>rec</sub> = 35.96Å; γ = 90°</b>  |       |     |    |                          |                |                 |             |           |
| 2.65(8)                                                                                                                                                                                                                            | 33.21 | S   | sh | 11                       | 33.21          | 21              | 33.21       | 0.00      |
| 4.07(5)                                                                                                                                                                                                                            | 21.66 | VS  | sh | 40                       | 21.66          | 80              | 21.66       | 0.00      |
| 5.02(9)                                                                                                                                                                                                                            | 17.56 | VS  | sh | 12                       | 17.60          | 22              | 17.60       | 0.04      |
| 5.32(0)                                                                                                                                                                                                                            | 16.60 | M   | sh | 22                       | 16.61          | 42              | 16.61       | 0.01      |
| 7.39(1)                                                                                                                                                                                                                            | 11.95 | W   | sh | 03                       | 11.99          | 13              | 11.96       | 0.04/0.01 |
| 7.51(5)                                                                                                                                                                                                                            | 11.70 | W   | sh | 71                       | 11.70          | 141             | 11.70       | 0.00      |
| 19.79                                                                                                                                                                                                                              | 4.48  | VS  | br | $h_{ch}+h_{br}$          | -              | $h_{ch}+h_{br}$ | -           | -         |
| 23.83                                                                                                                                                                                                                              | 3.72  | VS  | br | $h_{TP}$                 | -              | $h_{TP}$        | -           | -         |
| <b>TP<sup>6</sup>Ph<sub>2</sub>TP<sup>12</sup> (T = 50°C): Col<sub>rec</sub>;</b><br><b>a<sub>rec</sub> = 86.56Å; b<sub>rec</sub> = 35.11Å; γ = 90°</b><br><b>→ a<sub>rec</sub> = 173.12Å; b<sub>rec</sub> = 35.11Å; γ = 90°</b>   |       |     |    |                          |                |                 |             |           |
| 2.71(3)                                                                                                                                                                                                                            | 32.54 | S   | sh | 11                       | 32.54          | 21              | 32.54       | 0.00      |
| 4.07(9)                                                                                                                                                                                                                            | 21.64 | VS  | sh | 40                       | 21.64          | 80              | 21.64       | 0.00      |
| 5.11(7)                                                                                                                                                                                                                            | 17.25 | VS  | sh | 12                       | 17.20          | 22              | 17.20       | 0.05      |
| 5.41(6)                                                                                                                                                                                                                            | 16.30 | M   | sh | 22                       | 16.27          | 42              | 16.27       | 0.02      |
| 7.55(8)                                                                                                                                                                                                                            | 11.69 | W   | sh | 03                       | 11.70          | 13              | 11.68       | 0.01      |
| 19.83                                                                                                                                                                                                                              | 4.47  | W   | br | $h_{ch}+h_{br}$          | -              | $h_{ch}+h_{br}$ | -           | -         |
| 24.56                                                                                                                                                                                                                              | 3.62  | VS  | br | $h_{TP}$                 | -              | $h_{TP}$        | -           | -         |
| <b>TP<sup>12</sup>Ph<sub>2</sub>TP<sup>12</sup> (T = 110°C): Col<sub>rec</sub>;</b><br><b>a<sub>rec</sub> = 97.20Å; b<sub>rec</sub> = 37.33Å; γ = 90°</b><br><b>→ a<sub>rec</sub> = 194.40Å; b<sub>rec</sub> = 37.33Å; γ = 90°</b> |       |     |    |                          |                |                 |             |           |
| 2.53(3)                                                                                                                                                                                                                            | 34.85 | S   | sh | 11                       | 34.85          | 21              | 34.85       | 0.00      |
| 3.63(2)                                                                                                                                                                                                                            | 24.30 | S   | sh | 40                       | 24.30          | 80              | 24.30       | 0.00      |
| 4.79(7)                                                                                                                                                                                                                            | 18.40 | VS  | sh | 12                       | 18.33          | 22              | 18.33       | 0.07      |
| 6.58(7)                                                                                                                                                                                                                            | 13.41 | W   | sh | 52                       | 13.46          | 102             | 13.46       | 0.05      |
| 6.74(9)                                                                                                                                                                                                                            | 13.08 | W   | br | 71                       | 13.01          | 141             | 13.01       | 0.07      |
| 7.89(6)                                                                                                                                                                                                                            | 11.19 | W   | sh | 72                       | 11.14          | 142             | 11.14       | 0.05      |
| 19.51                                                                                                                                                                                                                              | 4.55  | VS  | br | $h_{ch}+h_{br}$          | -              | $h_{ch}+h_{br}$ | -           | -         |
| 23.65                                                                                                                                                                                                                              | 3.76  | VS  | br | $h_{TP}$                 | -              | $h_{TP}$        | -           | -         |
| <b>TP<sup>12</sup>Ph<sub>2</sub>TP<sup>12</sup> (T = 50°C): Col<sub>rec</sub>;</b><br><b>a<sub>rec</sub> = 96.80Å; b<sub>rec</sub> = 37.26Å; γ = 90°</b><br><b>→ a<sub>rec</sub> = 193.60Å; b<sub>rec</sub> = 37.26Å; γ = 90°</b>  |       |     |    |                          |                |                 |             |           |
| 2.53(9)                                                                                                                                                                                                                            | 34.77 | S   | sh | 11                       | 34.77          | 21              | 34.77       | 0.00      |
| 3.64(8)                                                                                                                                                                                                                            | 24.20 | S   | sh | 40                       | 24.20          | 80              | 24.20       | 0.00      |
| 4.83(0)                                                                                                                                                                                                                            | 18.28 | VS  | sh | 12                       | 18.29          | 22              | 18.29       | 0.01      |
| 6.60(5)                                                                                                                                                                                                                            | 13.37 | W   | sh | 52                       | 13.42          | 102             | 13.42       | 0.05      |
| 6.78(9)                                                                                                                                                                                                                            | 13.01 | W   | br | 71                       | 12.96          | 141             | 12.96       | 0.05      |
| 19.82                                                                                                                                                                                                                              | 4.47  | VS  | br | $h_{ch}+h_{br}$          | -              | $h_{ch}+h_{br}$ | -           | -         |
| 24.32                                                                                                                                                                                                                              | 3.66  | VS  | br | $h_{TP}$                 | -              | $h_{TP}$        | -           | -         |
| <b>TP<sup>6</sup>Th<sub>2</sub>TP<sup>12</sup> (T = 50°C): Col<sub>rec</sub>;</b><br><b>a<sub>rec</sub> = 88.80Å; b<sub>rec</sub> = 34.39Å; γ = 90°</b><br><b>→ a<sub>rec</sub> = 177.60Å; b<sub>rec</sub> = 34.39Å; γ = 90°</b>   |       |     |    |                          |                |                 |             |           |
| 2.75(2)                                                                                                                                                                                                                            | 32.07 | S   | sh | 11                       | 32.07          | 21              | 32.07       | 0.00      |
| 3.24(0)                                                                                                                                                                                                                            | 27.24 | W   | sh | 21                       | 27.19          | 41              | 27.19       | 0.05      |
| 3.62(0)                                                                                                                                                                                                                            | 24.39 | W   | sh | x                        | x              | 51              | 24.71       | 0.32      |

|                                                                                                                                                                                                                                    |       |    |    |                 |       |                 |             |           |
|------------------------------------------------------------------------------------------------------------------------------------------------------------------------------------------------------------------------------------|-------|----|----|-----------------|-------|-----------------|-------------|-----------|
| 3.97(6)                                                                                                                                                                                                                            | 22.20 | VS | sh | 40              | 22.20 | 80              | 22.20       | 0.00      |
| 4.74(3)                                                                                                                                                                                                                            | 18.61 | W  | br | 41              | 18.65 | 81              | 18.65       | 0.04      |
| 5.23(8)                                                                                                                                                                                                                            | 16.86 | S  | sh | 12              | 16.88 | 22              | 16.88       | 0.02      |
| 6.99(1)                                                                                                                                                                                                                            | 12.63 | W  | sh | 70              | 12.68 | 140/131         | 12.69       | 0.05/0.06 |
| 7.71(2)                                                                                                                                                                                                                            | 11.45 | M  | sh | 03              | 11.46 | 13              | 11.44       | 0.01/0.01 |
| 20.08                                                                                                                                                                                                                              | 4.42  | VS | br | $h_{ch}+h_{br}$ | -     | $h_{ch}+h_{br}$ | -           | -         |
| 24.57                                                                                                                                                                                                                              | 3.62  | VS | br | $h_{TP}$        | -     | $h_{TP}$        | -           | -         |
| <b>Tp<sup>6</sup>Th<sub>2</sub>Tp<sup>12</sup> (T = 105°C): Col<sub>rec</sub>;</b><br><b>a<sub>rec</sub> = 91.40Å; b<sub>rec</sub> = 34.25Å; γ = 90°</b><br><b>→ a<sub>rec</sub> = 182.80Å; b<sub>rec</sub> = 34.25Å; γ = 90°</b>  |       |    |    |                 |       |                 |             |           |
| 2.75(2)                                                                                                                                                                                                                            | 32.07 | S  | sh | 11              | 32.07 | 21              | 32.07       | 0.00      |
| 3.15(9)                                                                                                                                                                                                                            | 27.94 | W  | sh | 21              | 27.41 | 41              | 27.41       | 0.53      |
| 3.53(2)                                                                                                                                                                                                                            | 24.99 | W  | sh | x               | x     | 51              | 25.00       | 0.01      |
| 3.86(3)                                                                                                                                                                                                                            | 22.85 | VS | sh | 40              | 22.85 | 80              | 22.85       | 0.00      |
| 5.23(8)                                                                                                                                                                                                                            | 16.86 | W  | br | 12              | 16.83 | 22              | 16.83       | 0.03      |
| 6.72(5)                                                                                                                                                                                                                            | 13.13 | S  | sh | 70              | 13.06 | 140/92          | 13.09       | 0.07/0.04 |
| 7.41(3)                                                                                                                                                                                                                            | 11.92 | W  | sh | 71              | 12.20 | 112             | 11.92       | 0.00      |
| 20.01                                                                                                                                                                                                                              | 4.43  | VS | br | $h_{ch}+h_{br}$ | -     | $h_{ch}+h_{br}$ | -           | -         |
| 24.15                                                                                                                                                                                                                              | 3.68  | VS | br | $h_{TP}$        | -     | $h_{TP}$        | -           | -         |
| <b>Tp<sup>12</sup>Th<sub>2</sub>Tp<sup>12</sup> (T = 110°C): Col<sub>rec</sub>;</b><br><b>a<sub>rec</sub> = 93.64Å; b<sub>rec</sub> = 34.42Å; γ = 90°</b><br><b>→ a<sub>rec</sub> = 187.28Å; b<sub>rec</sub> = 34.42Å; γ = 90°</b> |       |    |    |                 |       |                 |             |           |
| 2.73(2)                                                                                                                                                                                                                            | 32.31 | M  | sh | 11              | 32.31 | 21              | 32.31       | 0.00      |
| 3.77(1)                                                                                                                                                                                                                            | 23.41 | VS | sh | 40              | 23.41 | 80              | 23.41       | 0.00      |
| 5.20(3)                                                                                                                                                                                                                            | 16.97 | M  | sh | 12              | 16.93 | 22              | 16.93       | 0.04      |
| 7.06(8)                                                                                                                                                                                                                            | 12.49 | W  | sh | 71              | 12.47 | 141/150         | 12.47/12.48 | 0.02/0.01 |
| 20.17                                                                                                                                                                                                                              | 4.40  | VS | br | $h_{ch}+h_{br}$ | -     | $h_{ch}+h_{br}$ | -           | -         |
| 23.97                                                                                                                                                                                                                              | 3.71  | VS | br | $h_{TP}$        | -     | $h_{TP}$        | -           | -         |

As above for **Table S9**.

## 12. STM

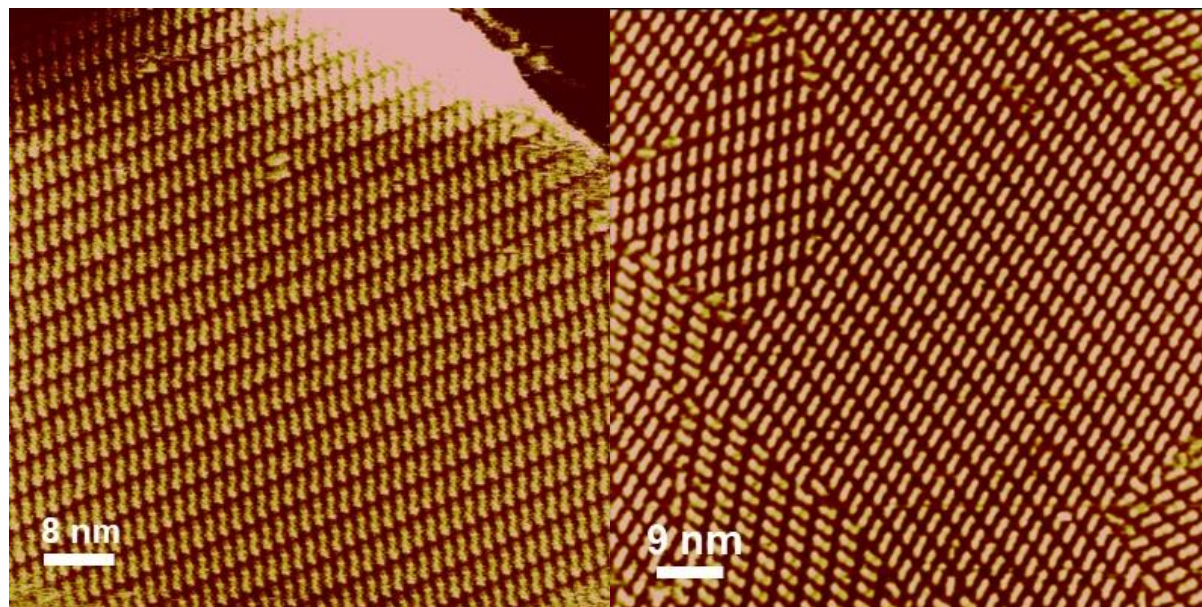

**Figure S71.** Large-scale STM images of the self-assembly of **Tp<sup>6</sup>Tt<sub>2</sub>Tp<sup>6</sup>** (left) and **Tp<sup>8</sup>Th<sub>2</sub>Tp<sup>8</sup>** (right) on the interface of 1-phenyloctane/HOPG. Conditions:  $I_{set} = 247.2$  pA,  $V_{bis} = 847.2$  mV and  $I_{set} = 271.6$  pA,  $V_{bis} = 770.0$  mV

### 13. Models' variations

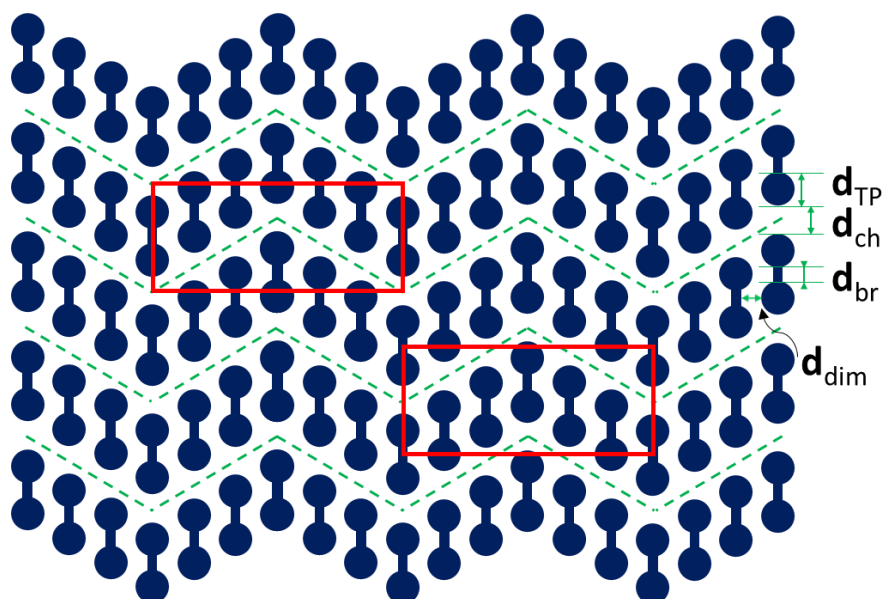

**Figure S72.** Parameters controlling the chevron columnar phase of symmetry  $pm$ :  $d_{TP}$  = diameter of cylinder (see Table 3);  $d_{br}$ , length of bridge;  $d_{ch}$ , chain separation;  $d_{dim}$ , distance between bridge and TP unit;  $b_{rec} = 2d_{TP} + d_{br} + d_{ch}$ . Single multicolumnar lattice shown in red.

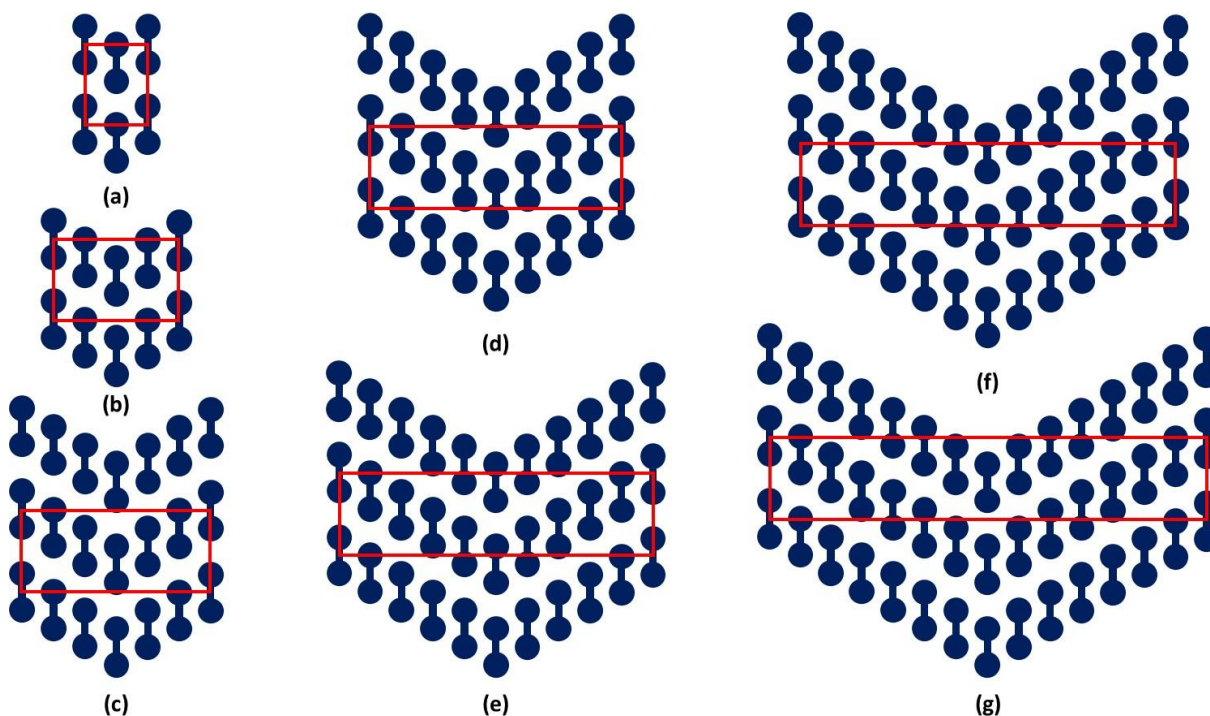

**Figure S73.** Idealized representations of the potentially extended family of  $pm$  chevron columnar phases containing increasing numbers of columns (and dimers) per rectangular superlattice: (a),  $Z = 4$ ,  $n_{mol} = 2$ ; (b),  $Z = 8$ ,  $n_{mol} = 4$ ; (c),  $Z = 12$ ,  $n_{mol} = 6$ ; (d),  $Z = 16$ ,  $n_{mol} = 8$ ; (e),  $Z = 20$ ,  $n_{mol} = 10$ ; (f),  $Z = 24$ ,  $n_{mol} = 12$ ; (g),  $Z = 28$ ,  $n_{mol} = 14$ .

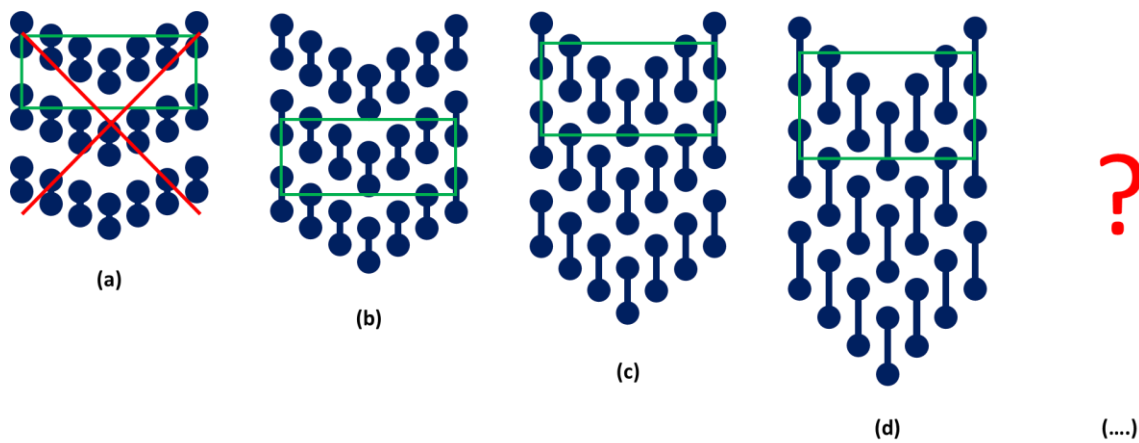

**Figure S74.** Effect of bridge length: induction of stacking faults and symmetry changes. (a),  $d_{br} = 0$  (not mesomorphous); (b),  $d_{br} = d_{TP}$  ( $Col_{rec-pm}$ ); (c),  $d_{br} = 2d_{TP}$  ( $Col_{rec-pm}$ ); (d),  $d_{br} = 3d_{TP}$  ( $Col_{rec-pm}$ ); ..... (?).
